# Supplementary material for: Unraveling the brain expression of BDNF in a mouse model of Anorexia Nervosa
Source: Research Square preprint supplement (doi:10.21203/rs.3.rs-6260210/v1), 2025-04-16
Supplement: Supplementary file 1 [file 204c68c51bfe4b3c7b3660f2.xlsx]

## Sheet: Supplementary Table 5
Supplementary Table 5. Functional Annotation of Differentially Expressed Genes in the prefrontal cortex from Table 2
external_gene_name	description	go_id	name_1006
Grm8	glutamate receptor, metabotropic 8 [Source:MGI Symbol;Acc:MGI:1351345]	GO:0004930	G protein-coupled receptor activity
Grm8	glutamate receptor, metabotropic 8 [Source:MGI Symbol;Acc:MGI:1351345]	GO:0007186	G protein-coupled receptor signaling pathway
Grm8	glutamate receptor, metabotropic 8 [Source:MGI Symbol;Acc:MGI:1351345]	GO:0016020	membrane
Grm8	glutamate receptor, metabotropic 8 [Source:MGI Symbol;Acc:MGI:1351345]	GO:0005886	plasma membrane
Grm8	glutamate receptor, metabotropic 8 [Source:MGI Symbol;Acc:MGI:1351345]	GO:0007154	cell communication
Grm8	glutamate receptor, metabotropic 8 [Source:MGI Symbol;Acc:MGI:1351345]	GO:0023052	signaling
Grm8	glutamate receptor, metabotropic 8 [Source:MGI Symbol;Acc:MGI:1351345]	GO:0008066	glutamate receptor activity
Grm8	glutamate receptor, metabotropic 8 [Source:MGI Symbol;Acc:MGI:1351345]	GO:0007193	adenylate cyclase-inhibiting G protein-coupled receptor signaling pathway
Grm8	glutamate receptor, metabotropic 8 [Source:MGI Symbol;Acc:MGI:1351345]	GO:0007196	adenylate cyclase-inhibiting G protein-coupled glutamate receptor signaling pathway
Grm8	glutamate receptor, metabotropic 8 [Source:MGI Symbol;Acc:MGI:1351345]	GO:0043025	neuronal cell body
Grm8	glutamate receptor, metabotropic 8 [Source:MGI Symbol;Acc:MGI:1351345]	GO:0098978	glutamatergic synapse
Grm8	glutamate receptor, metabotropic 8 [Source:MGI Symbol;Acc:MGI:1351345]	GO:0007268	chemical synaptic transmission
Grm8	glutamate receptor, metabotropic 8 [Source:MGI Symbol;Acc:MGI:1351345]	GO:0098982	GABA-ergic synapse
Grm8	glutamate receptor, metabotropic 8 [Source:MGI Symbol;Acc:MGI:1351345]	GO:0042734	presynaptic membrane
Grm8	glutamate receptor, metabotropic 8 [Source:MGI Symbol;Acc:MGI:1351345]	GO:0048787	presynaptic active zone membrane
Grm8	glutamate receptor, metabotropic 8 [Source:MGI Symbol;Acc:MGI:1351345]	GO:0035249	synaptic transmission, glutamatergic
Grm8	glutamate receptor, metabotropic 8 [Source:MGI Symbol;Acc:MGI:1351345]	GO:0046928	regulation of neurotransmitter secretion
Grm8	glutamate receptor, metabotropic 8 [Source:MGI Symbol;Acc:MGI:1351345]	GO:0050966	detection of mechanical stimulus involved in sensory perception of pain
Grm8	glutamate receptor, metabotropic 8 [Source:MGI Symbol;Acc:MGI:1351345]	GO:0099171	presynaptic modulation of chemical synaptic transmission
Grm8	glutamate receptor, metabotropic 8 [Source:MGI Symbol;Acc:MGI:1351345]	GO:0001642	group III metabotropic glutamate receptor activity
Grm8	glutamate receptor, metabotropic 8 [Source:MGI Symbol;Acc:MGI:1351345]	GO:0007216	G protein-coupled glutamate receptor signaling pathway
Grm8	glutamate receptor, metabotropic 8 [Source:MGI Symbol;Acc:MGI:1351345]	GO:0051966	regulation of synaptic transmission, glutamatergic
Grm8	glutamate receptor, metabotropic 8 [Source:MGI Symbol;Acc:MGI:1351345]	GO:0007165	signal transduction
Grm8	glutamate receptor, metabotropic 8 [Source:MGI Symbol;Acc:MGI:1351345]
Tacr1	tachykinin receptor 1 [Source:MGI Symbol;Acc:MGI:98475]
Tacr1	tachykinin receptor 1 [Source:MGI Symbol;Acc:MGI:98475]	GO:0004930	G protein-coupled receptor activity
Tacr1	tachykinin receptor 1 [Source:MGI Symbol;Acc:MGI:98475]	GO:0007186	G protein-coupled receptor signaling pathway
Tacr1	tachykinin receptor 1 [Source:MGI Symbol;Acc:MGI:98475]	GO:0016020	membrane
Tacr1	tachykinin receptor 1 [Source:MGI Symbol;Acc:MGI:98475]	GO:0005886	plasma membrane
Tacr1	tachykinin receptor 1 [Source:MGI Symbol;Acc:MGI:98475]	GO:0004995	tachykinin receptor activity
Tacr1	tachykinin receptor 1 [Source:MGI Symbol;Acc:MGI:98475]	GO:0048660	regulation of smooth muscle cell proliferation
Tacr1	tachykinin receptor 1 [Source:MGI Symbol;Acc:MGI:98475]	GO:0008217	regulation of blood pressure
Tacr1	tachykinin receptor 1 [Source:MGI Symbol;Acc:MGI:98475]	GO:0050679	positive regulation of epithelial cell proliferation
Tacr1	tachykinin receptor 1 [Source:MGI Symbol;Acc:MGI:98475]	GO:0071944	cell periphery
Tacr1	tachykinin receptor 1 [Source:MGI Symbol;Acc:MGI:98475]	GO:0009986	cell surface
Tacr1	tachykinin receptor 1 [Source:MGI Symbol;Acc:MGI:98475]	GO:0009725	response to hormone
Tacr1	tachykinin receptor 1 [Source:MGI Symbol;Acc:MGI:98475]	GO:0007204	positive regulation of cytosolic calcium ion concentration
Tacr1	tachykinin receptor 1 [Source:MGI Symbol;Acc:MGI:98475]	GO:0030425	dendrite
Tacr1	tachykinin receptor 1 [Source:MGI Symbol;Acc:MGI:98475]	GO:0044297	cell body
Tacr1	tachykinin receptor 1 [Source:MGI Symbol;Acc:MGI:98475]	GO:0014070	response to organic cyclic compound
Tacr1	tachykinin receptor 1 [Source:MGI Symbol;Acc:MGI:98475]	GO:0048266	behavioral response to pain
Tacr1	tachykinin receptor 1 [Source:MGI Symbol;Acc:MGI:98475]	GO:0045777	positive regulation of blood pressure
Tacr1	tachykinin receptor 1 [Source:MGI Symbol;Acc:MGI:98475]	GO:0035106	operant conditioning
Tacr1	tachykinin receptor 1 [Source:MGI Symbol;Acc:MGI:98475]	GO:0045778	positive regulation of ossification
Tacr1	tachykinin receptor 1 [Source:MGI Symbol;Acc:MGI:98475]	GO:0007611	learning or memory
Tacr1	tachykinin receptor 1 [Source:MGI Symbol;Acc:MGI:98475]	GO:0045471	response to ethanol
Tacr1	tachykinin receptor 1 [Source:MGI Symbol;Acc:MGI:98475]	GO:0042755	eating behavior
Tacr1	tachykinin receptor 1 [Source:MGI Symbol;Acc:MGI:98475]	GO:0045907	positive regulation of vasoconstriction
Tacr1	tachykinin receptor 1 [Source:MGI Symbol;Acc:MGI:98475]	GO:0043117	positive regulation of vascular permeability
Tacr1	tachykinin receptor 1 [Source:MGI Symbol;Acc:MGI:98475]	GO:0010634	positive regulation of epithelial cell migration
Tacr1	tachykinin receptor 1 [Source:MGI Symbol;Acc:MGI:98475]	GO:0008306	associative learning
Tacr1	tachykinin receptor 1 [Source:MGI Symbol;Acc:MGI:98475]	GO:0032230	positive regulation of synaptic transmission, GABAergic
Tacr1	tachykinin receptor 1 [Source:MGI Symbol;Acc:MGI:98475]	GO:0051496	positive regulation of stress fiber assembly
Tacr1	tachykinin receptor 1 [Source:MGI Symbol;Acc:MGI:98475]	GO:0002687	positive regulation of leukocyte migration
Tacr1	tachykinin receptor 1 [Source:MGI Symbol;Acc:MGI:98475]	GO:0048265	response to pain
Tacr1	tachykinin receptor 1 [Source:MGI Symbol;Acc:MGI:98475]	GO:0035094	response to nicotine
Tacr1	tachykinin receptor 1 [Source:MGI Symbol;Acc:MGI:98475]	GO:0007616	long-term memory
Tacr1	tachykinin receptor 1 [Source:MGI Symbol;Acc:MGI:98475]	GO:0032224	positive regulation of synaptic transmission, cholinergic
Tacr1	tachykinin receptor 1 [Source:MGI Symbol;Acc:MGI:98475]	GO:0070474	positive regulation of uterine smooth muscle contraction
Tacr1	tachykinin receptor 1 [Source:MGI Symbol;Acc:MGI:98475]	GO:0045760	positive regulation of action potential
Tacr1	tachykinin receptor 1 [Source:MGI Symbol;Acc:MGI:98475]	GO:0014910	regulation of smooth muscle cell migration
Tacr1	tachykinin receptor 1 [Source:MGI Symbol;Acc:MGI:98475]	GO:0050671	positive regulation of lymphocyte proliferation
Tacr1	tachykinin receptor 1 [Source:MGI Symbol;Acc:MGI:98475]	GO:0010996	response to auditory stimulus
Tacr1	tachykinin receptor 1 [Source:MGI Symbol;Acc:MGI:98475]	GO:0046887	positive regulation of hormone secretion
Tacr1	tachykinin receptor 1 [Source:MGI Symbol;Acc:MGI:98475]	GO:0002118	aggressive behavior
Tacr1	tachykinin receptor 1 [Source:MGI Symbol;Acc:MGI:98475]	GO:0042713	sperm ejaculation
Tacr1	tachykinin receptor 1 [Source:MGI Symbol;Acc:MGI:98475]	GO:0016496	substance P receptor activity
Tacr1	tachykinin receptor 1 [Source:MGI Symbol;Acc:MGI:98475]	GO:0003051	angiotensin-mediated drinking behavior
Tacr1	tachykinin receptor 1 [Source:MGI Symbol;Acc:MGI:98475]	GO:0007217	tachykinin receptor signaling pathway
Tacr1	tachykinin receptor 1 [Source:MGI Symbol;Acc:MGI:98475]	GO:0010193	response to ozone
Tacr1	tachykinin receptor 1 [Source:MGI Symbol;Acc:MGI:98475]	GO:0032355	response to estradiol
Tacr1	tachykinin receptor 1 [Source:MGI Symbol;Acc:MGI:98475]	GO:0032570	response to progesterone
Tacr1	tachykinin receptor 1 [Source:MGI Symbol;Acc:MGI:98475]	GO:0051602	response to electrical stimulus
Tacr1	tachykinin receptor 1 [Source:MGI Symbol;Acc:MGI:98475]	GO:0060083	smooth muscle contraction involved in micturition
Tacr1	tachykinin receptor 1 [Source:MGI Symbol;Acc:MGI:98475]	GO:0070472	regulation of uterine smooth muscle contraction
Tacr1	tachykinin receptor 1 [Source:MGI Symbol;Acc:MGI:98475]	GO:1902093	positive regulation of flagellated sperm motility
Tacr1	tachykinin receptor 1 [Source:MGI Symbol;Acc:MGI:98475]	GO:0097225	sperm midpiece
Tacr1	tachykinin receptor 1 [Source:MGI Symbol;Acc:MGI:98475]	GO:0036126	sperm flagellum
Tacr1	tachykinin receptor 1 [Source:MGI Symbol;Acc:MGI:98475]	GO:0045211	postsynaptic membrane
Tacr1	tachykinin receptor 1 [Source:MGI Symbol;Acc:MGI:98475]	GO:0061827	sperm head
Ddc	dopa decarboxylase [Source:MGI Symbol;Acc:MGI:94876]	GO:0030170	pyridoxal phosphate binding
Ddc	dopa decarboxylase [Source:MGI Symbol;Acc:MGI:94876]	GO:0006520	amino acid metabolic process
Ddc	dopa decarboxylase [Source:MGI Symbol;Acc:MGI:94876]	GO:0016830	carbon-carbon lyase activity
Ddc	dopa decarboxylase [Source:MGI Symbol;Acc:MGI:94876]	GO:0019752	carboxylic acid metabolic process
Ddc	dopa decarboxylase [Source:MGI Symbol;Acc:MGI:94876]	GO:0016831	carboxy-lyase activity
Ddc	dopa decarboxylase [Source:MGI Symbol;Acc:MGI:94876]	GO:0010467	gene expression
Ddc	dopa decarboxylase [Source:MGI Symbol;Acc:MGI:94876]	GO:0005737	cytoplasm
Ddc	dopa decarboxylase [Source:MGI Symbol;Acc:MGI:94876]	GO:0030424	axon
Ddc	dopa decarboxylase [Source:MGI Symbol;Acc:MGI:94876]	GO:0043025	neuronal cell body
Ddc	dopa decarboxylase [Source:MGI Symbol;Acc:MGI:94876]	GO:0001822	kidney development
Ddc	dopa decarboxylase [Source:MGI Symbol;Acc:MGI:94876]	GO:0019904	protein domain specific binding
Ddc	dopa decarboxylase [Source:MGI Symbol;Acc:MGI:94876]	GO:0042416	dopamine biosynthetic process
Ddc	dopa decarboxylase [Source:MGI Symbol;Acc:MGI:94876]	GO:0008021	synaptic vesicle
Ddc	dopa decarboxylase [Source:MGI Symbol;Acc:MGI:94876]	GO:0016597	amino acid binding
Ddc	dopa decarboxylase [Source:MGI Symbol;Acc:MGI:94876]	GO:0009636	response to toxic substance
Ddc	dopa decarboxylase [Source:MGI Symbol;Acc:MGI:94876]	GO:0004058	aromatic-L-amino-acid decarboxylase activity
Ddc	dopa decarboxylase [Source:MGI Symbol;Acc:MGI:94876]	GO:0036467	5-hydroxy-L-tryptophan decarboxylase activity
Ddc	dopa decarboxylase [Source:MGI Symbol;Acc:MGI:94876]	GO:0036468	L-dopa decarboxylase activity
Ddc	dopa decarboxylase [Source:MGI Symbol;Acc:MGI:94876]	GO:0006584	catecholamine metabolic process
Ddc	dopa decarboxylase [Source:MGI Symbol;Acc:MGI:94876]	GO:0015842	aminergic neurotransmitter loading into synaptic vesicle
Ddc	dopa decarboxylase [Source:MGI Symbol;Acc:MGI:94876]	GO:0042423	catecholamine biosynthetic process
Ddc	dopa decarboxylase [Source:MGI Symbol;Acc:MGI:94876]	GO:0042427	serotonin biosynthetic process
Ddc	dopa decarboxylase [Source:MGI Symbol;Acc:MGI:94876]	GO:0003824	catalytic activity
Ddc	dopa decarboxylase [Source:MGI Symbol;Acc:MGI:94876]	GO:0016829	lyase activity
Ddc	dopa decarboxylase [Source:MGI Symbol;Acc:MGI:94876]
Ddc	dopa decarboxylase [Source:MGI Symbol;Acc:MGI:94876]	GO:0019899	enzyme binding
Mmp9	matrix metallopeptidase 9 [Source:MGI Symbol;Acc:MGI:97011]
Mmp9	matrix metallopeptidase 9 [Source:MGI Symbol;Acc:MGI:97011]	GO:0008270	zinc ion binding
Mmp9	matrix metallopeptidase 9 [Source:MGI Symbol;Acc:MGI:97011]	GO:0006508	proteolysis
Mmp9	matrix metallopeptidase 9 [Source:MGI Symbol;Acc:MGI:97011]	GO:0008237	metallopeptidase activity
Mmp9	matrix metallopeptidase 9 [Source:MGI Symbol;Acc:MGI:97011]	GO:0004222	metalloendopeptidase activity
Mmp9	matrix metallopeptidase 9 [Source:MGI Symbol;Acc:MGI:97011]	GO:0031012	extracellular matrix
Mmp9	matrix metallopeptidase 9 [Source:MGI Symbol;Acc:MGI:97011]	GO:0048771	tissue remodeling
Mmp9	matrix metallopeptidase 9 [Source:MGI Symbol;Acc:MGI:97011]	GO:0045766	positive regulation of angiogenesis
Mmp9	matrix metallopeptidase 9 [Source:MGI Symbol;Acc:MGI:97011]	GO:0006915	apoptotic process
Mmp9	matrix metallopeptidase 9 [Source:MGI Symbol;Acc:MGI:97011]	GO:0007566	embryo implantation
Mmp9	matrix metallopeptidase 9 [Source:MGI Symbol;Acc:MGI:97011]	GO:0044877	protein-containing complex binding
Mmp9	matrix metallopeptidase 9 [Source:MGI Symbol;Acc:MGI:97011]	GO:0007507	heart development
Mmp9	matrix metallopeptidase 9 [Source:MGI Symbol;Acc:MGI:97011]	GO:0001501	skeletal system development
Mmp9	matrix metallopeptidase 9 [Source:MGI Symbol;Acc:MGI:97011]	GO:0046872	metal ion binding
Mmp9	matrix metallopeptidase 9 [Source:MGI Symbol;Acc:MGI:97011]	GO:0005615	extracellular space
Mmp9	matrix metallopeptidase 9 [Source:MGI Symbol;Acc:MGI:97011]	GO:0008233	peptidase activity
Mmp9	matrix metallopeptidase 9 [Source:MGI Symbol;Acc:MGI:97011]	GO:0005576	extracellular region
Mmp9	matrix metallopeptidase 9 [Source:MGI Symbol;Acc:MGI:97011]	GO:0009410	response to xenobiotic stimulus
Mmp9	matrix metallopeptidase 9 [Source:MGI Symbol;Acc:MGI:97011]	GO:0030198	extracellular matrix organization
Mmp9	matrix metallopeptidase 9 [Source:MGI Symbol;Acc:MGI:97011]	GO:0032991	protein-containing complex
Mmp9	matrix metallopeptidase 9 [Source:MGI Symbol;Acc:MGI:97011]	GO:0030163	protein catabolic process
Mmp9	matrix metallopeptidase 9 [Source:MGI Symbol;Acc:MGI:97011]	GO:0043065	positive regulation of apoptotic process
Mmp9	matrix metallopeptidase 9 [Source:MGI Symbol;Acc:MGI:97011]	GO:0062023	collagen-containing extracellular matrix
Mmp9	matrix metallopeptidase 9 [Source:MGI Symbol;Acc:MGI:97011]	GO:0030574	collagen catabolic process
Mmp9	matrix metallopeptidase 9 [Source:MGI Symbol;Acc:MGI:97011]	GO:0048147	negative regulation of fibroblast proliferation
Mmp9	matrix metallopeptidase 9 [Source:MGI Symbol;Acc:MGI:97011]	GO:0006979	response to oxidative stress
Mmp9	matrix metallopeptidase 9 [Source:MGI Symbol;Acc:MGI:97011]	GO:0001968	fibronectin binding
Mmp9	matrix metallopeptidase 9 [Source:MGI Symbol;Acc:MGI:97011]	GO:0002687	positive regulation of leukocyte migration
Mmp9	matrix metallopeptidase 9 [Source:MGI Symbol;Acc:MGI:97011]	GO:1904645	response to amyloid-beta
Mmp9	matrix metallopeptidase 9 [Source:MGI Symbol;Acc:MGI:97011]	GO:0048246	macrophage chemotaxis
Mmp9	matrix metallopeptidase 9 [Source:MGI Symbol;Acc:MGI:97011]	GO:0031915	positive regulation of synaptic plasticity
Mmp9	matrix metallopeptidase 9 [Source:MGI Symbol;Acc:MGI:97011]	GO:0004175	endopeptidase activity
Mmp9	matrix metallopeptidase 9 [Source:MGI Symbol;Acc:MGI:97011]	GO:0042802	identical protein binding
Mmp9	matrix metallopeptidase 9 [Source:MGI Symbol;Acc:MGI:97011]	GO:0016477	cell migration
Mmp9	matrix metallopeptidase 9 [Source:MGI Symbol;Acc:MGI:97011]	GO:0034614	cellular response to reactive oxygen species
Mmp9	matrix metallopeptidase 9 [Source:MGI Symbol;Acc:MGI:97011]	GO:0035987	endodermal cell differentiation
Mmp9	matrix metallopeptidase 9 [Source:MGI Symbol;Acc:MGI:97011]	GO:0043066	negative regulation of apoptotic process
Mmp9	matrix metallopeptidase 9 [Source:MGI Symbol;Acc:MGI:97011]	GO:0045742	positive regulation of epidermal growth factor receptor signaling pathway
Mmp9	matrix metallopeptidase 9 [Source:MGI Symbol;Acc:MGI:97011]	GO:0051549	positive regulation of keratinocyte migration
Mmp9	matrix metallopeptidase 9 [Source:MGI Symbol;Acc:MGI:97011]	GO:0071276	cellular response to cadmium ion
Mmp9	matrix metallopeptidase 9 [Source:MGI Symbol;Acc:MGI:97011]	GO:0071460	cellular response to cell-matrix adhesion
Mmp9	matrix metallopeptidase 9 [Source:MGI Symbol;Acc:MGI:97011]	GO:0071492	cellular response to UV-A
Mmp9	matrix metallopeptidase 9 [Source:MGI Symbol;Acc:MGI:97011]	GO:0090200	positive regulation of release of cytochrome c from mitochondria
Mmp9	matrix metallopeptidase 9 [Source:MGI Symbol;Acc:MGI:97011]	GO:1904707	positive regulation of vascular associated smooth muscle cell proliferation
Mmp9	matrix metallopeptidase 9 [Source:MGI Symbol;Acc:MGI:97011]	GO:2000697	negative regulation of epithelial cell differentiation involved in kidney development
Mmp9	matrix metallopeptidase 9 [Source:MGI Symbol;Acc:MGI:97011]	GO:2001243	negative regulation of intrinsic apoptotic signaling pathway
Ppp1r1b	protein phosphatase 1, regulatory inhibitor subunit 1B [Source:MGI Symbol;Acc:MGI:94860]
Ppp1r1b	protein phosphatase 1, regulatory inhibitor subunit 1B [Source:MGI Symbol;Acc:MGI:94860]	GO:0007165	signal transduction
Ppp1r1b	protein phosphatase 1, regulatory inhibitor subunit 1B [Source:MGI Symbol;Acc:MGI:94860]	GO:0004864	protein phosphatase inhibitor activity
Ppp1r1b	protein phosphatase 1, regulatory inhibitor subunit 1B [Source:MGI Symbol;Acc:MGI:94860]	GO:0005634	nucleus
Ppp1r1b	protein phosphatase 1, regulatory inhibitor subunit 1B [Source:MGI Symbol;Acc:MGI:94860]	GO:0005737	cytoplasm
Ppp1r1b	protein phosphatase 1, regulatory inhibitor subunit 1B [Source:MGI Symbol;Acc:MGI:94860]	GO:0007626	locomotory behavior
Ppp1r1b	protein phosphatase 1, regulatory inhibitor subunit 1B [Source:MGI Symbol;Acc:MGI:94860]	GO:0035556	intracellular signal transduction
Ppp1r1b	protein phosphatase 1, regulatory inhibitor subunit 1B [Source:MGI Symbol;Acc:MGI:94860]	GO:0043025	neuronal cell body
Ppp1r1b	protein phosphatase 1, regulatory inhibitor subunit 1B [Source:MGI Symbol;Acc:MGI:94860]	GO:0098978	glutamatergic synapse
Ppp1r1b	protein phosphatase 1, regulatory inhibitor subunit 1B [Source:MGI Symbol;Acc:MGI:94860]	GO:0007613	memory
Ppp1r1b	protein phosphatase 1, regulatory inhibitor subunit 1B [Source:MGI Symbol;Acc:MGI:94860]	GO:0008542	visual learning
Ppp1r1b	protein phosphatase 1, regulatory inhibitor subunit 1B [Source:MGI Symbol;Acc:MGI:94860]	GO:0006351	DNA-templated transcription
Ppp1r1b	protein phosphatase 1, regulatory inhibitor subunit 1B [Source:MGI Symbol;Acc:MGI:94860]	GO:0098794	postsynapse
Ppp1r1b	protein phosphatase 1, regulatory inhibitor subunit 1B [Source:MGI Symbol;Acc:MGI:94860]	GO:0042220	response to cocaine
Ppp1r1b	protein phosphatase 1, regulatory inhibitor subunit 1B [Source:MGI Symbol;Acc:MGI:94860]	GO:0044326	dendritic spine neck
Ppp1r1b	protein phosphatase 1, regulatory inhibitor subunit 1B [Source:MGI Symbol;Acc:MGI:94860]	GO:0048148	behavioral response to cocaine
Ppp1r1b	protein phosphatase 1, regulatory inhibitor subunit 1B [Source:MGI Symbol;Acc:MGI:94860]	GO:0035094	response to nicotine
Ppp1r1b	protein phosphatase 1, regulatory inhibitor subunit 1B [Source:MGI Symbol;Acc:MGI:94860]	GO:0001975	response to amphetamine
Ppp1r1b	protein phosphatase 1, regulatory inhibitor subunit 1B [Source:MGI Symbol;Acc:MGI:94860]	GO:0071314	cellular response to cocaine
Ppp1r1b	protein phosphatase 1, regulatory inhibitor subunit 1B [Source:MGI Symbol;Acc:MGI:94860]	GO:0043278	response to morphine
Ppp1r1b	protein phosphatase 1, regulatory inhibitor subunit 1B [Source:MGI Symbol;Acc:MGI:94860]	GO:0031752	D5 dopamine receptor binding
Ppp1r1b	protein phosphatase 1, regulatory inhibitor subunit 1B [Source:MGI Symbol;Acc:MGI:94860]	GO:0031748	D1 dopamine receptor binding
Ppp1r1b	protein phosphatase 1, regulatory inhibitor subunit 1B [Source:MGI Symbol;Acc:MGI:94860]	GO:0007621	negative regulation of female receptivity
Ppp1r1b	protein phosphatase 1, regulatory inhibitor subunit 1B [Source:MGI Symbol;Acc:MGI:94860]	GO:0031749	D2 dopamine receptor binding
Ppp1r1b	protein phosphatase 1, regulatory inhibitor subunit 1B [Source:MGI Symbol;Acc:MGI:94860]	GO:0044327	dendritic spine head
Ppp1r1b	protein phosphatase 1, regulatory inhibitor subunit 1B [Source:MGI Symbol;Acc:MGI:94860]	GO:0004865	protein serine/threonine phosphatase inhibitor activity
Ppp1r1b	protein phosphatase 1, regulatory inhibitor subunit 1B [Source:MGI Symbol;Acc:MGI:94860]	GO:0031750	D3 dopamine receptor binding
Ppp1r1b	protein phosphatase 1, regulatory inhibitor subunit 1B [Source:MGI Symbol;Acc:MGI:94860]	GO:0031751	D4 dopamine receptor binding
Pkp2	plakophilin 2 [Source:MGI Symbol;Acc:MGI:1914701]
Pkp2	plakophilin 2 [Source:MGI Symbol;Acc:MGI:1914701]	GO:0005515	protein binding
Pkp2	plakophilin 2 [Source:MGI Symbol;Acc:MGI:1914701]	GO:0098609	cell-cell adhesion
Pkp2	plakophilin 2 [Source:MGI Symbol;Acc:MGI:1914701]	GO:0008285	negative regulation of cell population proliferation
Pkp2	plakophilin 2 [Source:MGI Symbol;Acc:MGI:1914701]	GO:0007507	heart development
Pkp2	plakophilin 2 [Source:MGI Symbol;Acc:MGI:1914701]	GO:0005634	nucleus
Pkp2	plakophilin 2 [Source:MGI Symbol;Acc:MGI:1914701]	GO:0005737	cytoplasm
Pkp2	plakophilin 2 [Source:MGI Symbol;Acc:MGI:1914701]	GO:0005886	plasma membrane
Pkp2	plakophilin 2 [Source:MGI Symbol;Acc:MGI:1914701]	GO:0003677	DNA binding
Pkp2	plakophilin 2 [Source:MGI Symbol;Acc:MGI:1914701]	GO:0007155	cell adhesion
Pkp2	plakophilin 2 [Source:MGI Symbol;Acc:MGI:1914701]	GO:0070161	anchoring junction
Pkp2	plakophilin 2 [Source:MGI Symbol;Acc:MGI:1914701]	GO:0030054	cell junction
Pkp2	plakophilin 2 [Source:MGI Symbol;Acc:MGI:1914701]	GO:0005911	cell-cell junction
Pkp2	plakophilin 2 [Source:MGI Symbol;Acc:MGI:1914701]	GO:0045296	cadherin binding
Pkp2	plakophilin 2 [Source:MGI Symbol;Acc:MGI:1914701]	GO:0005912	adherens junction
Pkp2	plakophilin 2 [Source:MGI Symbol;Acc:MGI:1914701]	GO:0030057	desmosome
Pkp2	plakophilin 2 [Source:MGI Symbol;Acc:MGI:1914701]	GO:0045110	intermediate filament bundle assembly
Pkp2	plakophilin 2 [Source:MGI Symbol;Acc:MGI:1914701]	GO:0072659	protein localization to plasma membrane
Pkp2	plakophilin 2 [Source:MGI Symbol;Acc:MGI:1914701]	GO:0014704	intercalated disc
Pkp2	plakophilin 2 [Source:MGI Symbol;Acc:MGI:1914701]	GO:0030336	negative regulation of cell migration
Pkp2	plakophilin 2 [Source:MGI Symbol;Acc:MGI:1914701]	GO:0005882	intermediate filament
Pkp2	plakophilin 2 [Source:MGI Symbol;Acc:MGI:1914701]	GO:0055088	lipid homeostasis
Pkp2	plakophilin 2 [Source:MGI Symbol;Acc:MGI:1914701]	GO:2000810	regulation of bicellular tight junction assembly
Pkp2	plakophilin 2 [Source:MGI Symbol;Acc:MGI:1914701]	GO:0016264	gap junction assembly
Pkp2	plakophilin 2 [Source:MGI Symbol;Acc:MGI:1914701]	GO:0086001	cardiac muscle cell action potential
Pkp2	plakophilin 2 [Source:MGI Symbol;Acc:MGI:1914701]	GO:0005080	protein kinase C binding
Pkp2	plakophilin 2 [Source:MGI Symbol;Acc:MGI:1914701]	GO:0019215	intermediate filament binding
Pkp2	plakophilin 2 [Source:MGI Symbol;Acc:MGI:1914701]	GO:0045294	alpha-catenin binding
Pkp2	plakophilin 2 [Source:MGI Symbol;Acc:MGI:1914701]	GO:0060090	molecular adaptor activity
Pkp2	plakophilin 2 [Source:MGI Symbol;Acc:MGI:1914701]	GO:0002159	desmosome assembly
Pkp2	plakophilin 2 [Source:MGI Symbol;Acc:MGI:1914701]	GO:0002934	desmosome organization
Pkp2	plakophilin 2 [Source:MGI Symbol;Acc:MGI:1914701]	GO:0010810	regulation of cell-substrate adhesion
Pkp2	plakophilin 2 [Source:MGI Symbol;Acc:MGI:1914701]	GO:0034334	adherens junction maintenance
Pkp2	plakophilin 2 [Source:MGI Symbol;Acc:MGI:1914701]	GO:0048496	maintenance of animal organ identity
Pkp2	plakophilin 2 [Source:MGI Symbol;Acc:MGI:1914701]	GO:0055010	ventricular cardiac muscle tissue morphogenesis
Pkp2	plakophilin 2 [Source:MGI Symbol;Acc:MGI:1914701]	GO:0086002	cardiac muscle cell action potential involved in contraction
Pkp2	plakophilin 2 [Source:MGI Symbol;Acc:MGI:1914701]	GO:0086005	ventricular cardiac muscle cell action potential
Pkp2	plakophilin 2 [Source:MGI Symbol;Acc:MGI:1914701]	GO:0086019	cell-cell signaling involved in cardiac conduction
Pkp2	plakophilin 2 [Source:MGI Symbol;Acc:MGI:1914701]	GO:0086073	bundle of His cell-Purkinje myocyte adhesion involved in cell communication
Pkp2	plakophilin 2 [Source:MGI Symbol;Acc:MGI:1914701]	GO:0086091	regulation of heart rate by cardiac conduction
Pkp2	plakophilin 2 [Source:MGI Symbol;Acc:MGI:1914701]	GO:0098911	regulation of ventricular cardiac muscle cell action potential
Pkp2	plakophilin 2 [Source:MGI Symbol;Acc:MGI:1914701]	GO:0099017	maintenance of protein localization at cell tip
Pkp2	plakophilin 2 [Source:MGI Symbol;Acc:MGI:1914701]	GO:1900024	regulation of substrate adhesion-dependent cell spreading
Pkp2	plakophilin 2 [Source:MGI Symbol;Acc:MGI:1914701]	GO:0005654	nucleoplasm
Pkp2	plakophilin 2 [Source:MGI Symbol;Acc:MGI:1914701]	GO:0051286	cell tip
Dnmt3b	DNA methyltransferase 3B [Source:MGI Symbol;Acc:MGI:1261819]	GO:0008168	methyltransferase activity
Dnmt3b	DNA methyltransferase 3B [Source:MGI Symbol;Acc:MGI:1261819]	GO:0010468	regulation of gene expression
Dnmt3b	DNA methyltransferase 3B [Source:MGI Symbol;Acc:MGI:1261819]	GO:0009008	DNA-methyltransferase activity
Dnmt3b	DNA methyltransferase 3B [Source:MGI Symbol;Acc:MGI:1261819]	GO:0005634	nucleus
Dnmt3b	DNA methyltransferase 3B [Source:MGI Symbol;Acc:MGI:1261819]	GO:0071230	cellular response to amino acid stimulus
Dnmt3b	DNA methyltransferase 3B [Source:MGI Symbol;Acc:MGI:1261819]	GO:0005515	protein binding
Dnmt3b	DNA methyltransferase 3B [Source:MGI Symbol;Acc:MGI:1261819]	GO:0000122	negative regulation of transcription by RNA polymerase II
Dnmt3b	DNA methyltransferase 3B [Source:MGI Symbol;Acc:MGI:1261819]	GO:0045666	positive regulation of neuron differentiation
Dnmt3b	DNA methyltransferase 3B [Source:MGI Symbol;Acc:MGI:1261819]	GO:0106222	lncRNA binding
Dnmt3b	DNA methyltransferase 3B [Source:MGI Symbol;Acc:MGI:1261819]	GO:0003682	chromatin binding
Dnmt3b	DNA methyltransferase 3B [Source:MGI Symbol;Acc:MGI:1261819]	GO:0046872	metal ion binding
Dnmt3b	DNA methyltransferase 3B [Source:MGI Symbol;Acc:MGI:1261819]	GO:0003677	DNA binding
Dnmt3b	DNA methyltransferase 3B [Source:MGI Symbol;Acc:MGI:1261819]	GO:0032259	methylation
Dnmt3b	DNA methyltransferase 3B [Source:MGI Symbol;Acc:MGI:1261819]	GO:0000775	chromosome, centromeric region
Dnmt3b	DNA methyltransferase 3B [Source:MGI Symbol;Acc:MGI:1261819]	GO:0140640	catalytic activity, acting on a nucleic acid
Dnmt3b	DNA methyltransferase 3B [Source:MGI Symbol;Acc:MGI:1261819]	GO:0003006	developmental process involved in reproduction
Dnmt3b	DNA methyltransferase 3B [Source:MGI Symbol;Acc:MGI:1261819]	GO:0007276	gamete generation
Dnmt3b	DNA methyltransferase 3B [Source:MGI Symbol;Acc:MGI:1261819]	GO:0031507	heterochromatin formation
Dnmt3b	DNA methyltransferase 3B [Source:MGI Symbol;Acc:MGI:1261819]	GO:0045892	negative regulation of DNA-templated transcription
Dnmt3b	DNA methyltransferase 3B [Source:MGI Symbol;Acc:MGI:1261819]	GO:0040029	epigenetic regulation of gene expression
Dnmt3b	DNA methyltransferase 3B [Source:MGI Symbol;Acc:MGI:1261819]	GO:0005654	nucleoplasm
Dnmt3b	DNA methyltransferase 3B [Source:MGI Symbol;Acc:MGI:1261819]	GO:0042826	histone deacetylase binding
Dnmt3b	DNA methyltransferase 3B [Source:MGI Symbol;Acc:MGI:1261819]	GO:0031503	protein-containing complex localization
Dnmt3b	DNA methyltransferase 3B [Source:MGI Symbol;Acc:MGI:1261819]	GO:0003886	DNA (cytosine-5-)-methyltransferase activity
Dnmt3b	DNA methyltransferase 3B [Source:MGI Symbol;Acc:MGI:1261819]	GO:0006346	DNA methylation-dependent heterochromatin formation
Dnmt3b	DNA methyltransferase 3B [Source:MGI Symbol;Acc:MGI:1261819]	GO:0000792	heterochromatin
Dnmt3b	DNA methyltransferase 3B [Source:MGI Symbol;Acc:MGI:1261819]	GO:0045814	negative regulation of gene expression, epigenetic
Dnmt3b	DNA methyltransferase 3B [Source:MGI Symbol;Acc:MGI:1261819]	GO:0043045	epigenetic programming of gene expression
Dnmt3b	DNA methyltransferase 3B [Source:MGI Symbol;Acc:MGI:1261819]	GO:0141068	autosome genomic imprinting
Dnmt3b	DNA methyltransferase 3B [Source:MGI Symbol;Acc:MGI:1261819]	GO:0051719	DNA (cytosine-5-)-methyltransferase activity, acting on CpN substrates
Dnmt3b	DNA methyltransferase 3B [Source:MGI Symbol;Acc:MGI:1261819]	GO:0051718	DNA (cytosine-5-)-methyltransferase activity, acting on CpG substrates
Dnmt3b	DNA methyltransferase 3B [Source:MGI Symbol;Acc:MGI:1261819]	GO:0001666	response to hypoxia
Dnmt3b	DNA methyltransferase 3B [Source:MGI Symbol;Acc:MGI:1261819]	GO:0009410	response to xenobiotic stimulus
Dnmt3b	DNA methyltransferase 3B [Source:MGI Symbol;Acc:MGI:1261819]	GO:0009636	response to toxic substance
Dnmt3b	DNA methyltransferase 3B [Source:MGI Symbol;Acc:MGI:1261819]	GO:0010212	response to ionizing radiation
Dnmt3b	DNA methyltransferase 3B [Source:MGI Symbol;Acc:MGI:1261819]	GO:0014823	response to activity
Dnmt3b	DNA methyltransferase 3B [Source:MGI Symbol;Acc:MGI:1261819]	GO:0031000	response to caffeine
Dnmt3b	DNA methyltransferase 3B [Source:MGI Symbol;Acc:MGI:1261819]	GO:0032355	response to estradiol
Dnmt3b	DNA methyltransferase 3B [Source:MGI Symbol;Acc:MGI:1261819]	GO:0033189	response to vitamin A
Dnmt3b	DNA methyltransferase 3B [Source:MGI Symbol;Acc:MGI:1261819]	GO:0042220	response to cocaine
Dnmt3b	DNA methyltransferase 3B [Source:MGI Symbol;Acc:MGI:1261819]	GO:0071455	cellular response to hyperoxia
Dnmt3b	DNA methyltransferase 3B [Source:MGI Symbol;Acc:MGI:1261819]	GO:0071549	cellular response to dexamethasone stimulus
Dnmt3b	DNA methyltransferase 3B [Source:MGI Symbol;Acc:MGI:1261819]	GO:0097305	response to alcohol
Dnmt3b	DNA methyltransferase 3B [Source:MGI Symbol;Acc:MGI:1261819]
Fkbp5	FK506 binding protein 5 [Source:MGI Symbol;Acc:MGI:104670]	GO:0005515	protein binding
Fkbp5	FK506 binding protein 5 [Source:MGI Symbol;Acc:MGI:104670]	GO:0003755	peptidyl-prolyl cis-trans isomerase activity
Fkbp5	FK506 binding protein 5 [Source:MGI Symbol;Acc:MGI:104670]	GO:0009617	response to bacterium
Fkbp5	FK506 binding protein 5 [Source:MGI Symbol;Acc:MGI:104670]	GO:0005634	nucleus
Fkbp5	FK506 binding protein 5 [Source:MGI Symbol;Acc:MGI:104670]	GO:0005737	cytoplasm
Fkbp5	FK506 binding protein 5 [Source:MGI Symbol;Acc:MGI:104670]	GO:0016853	isomerase activity
Fkbp5	FK506 binding protein 5 [Source:MGI Symbol;Acc:MGI:104670]	GO:0005829	cytosol
Fkbp5	FK506 binding protein 5 [Source:MGI Symbol;Acc:MGI:104670]	GO:0061077	chaperone-mediated protein folding
Fkbp5	FK506 binding protein 5 [Source:MGI Symbol;Acc:MGI:104670]	GO:0030674	protein-macromolecule adaptor activity
Fkbp5	FK506 binding protein 5 [Source:MGI Symbol;Acc:MGI:104670]	GO:0031072	heat shock protein binding
Fkbp5	FK506 binding protein 5 [Source:MGI Symbol;Acc:MGI:104670]	GO:0042220	response to cocaine
Fkbp5	FK506 binding protein 5 [Source:MGI Symbol;Acc:MGI:104670]	GO:0097305	response to alcohol
Fkbp5	FK506 binding protein 5 [Source:MGI Symbol;Acc:MGI:104670]	GO:0005654	nucleoplasm
Fkbp5	FK506 binding protein 5 [Source:MGI Symbol;Acc:MGI:104670]
Fkbp5	FK506 binding protein 5 [Source:MGI Symbol;Acc:MGI:104670]	GO:0016529	sarcoplasmic reticulum
Mc4r	melanocortin 4 receptor [Source:MGI Symbol;Acc:MGI:99457]	GO:0004930	G protein-coupled receptor activity
Mc4r	melanocortin 4 receptor [Source:MGI Symbol;Acc:MGI:99457]	GO:0007186	G protein-coupled receptor signaling pathway
Mc4r	melanocortin 4 receptor [Source:MGI Symbol;Acc:MGI:99457]	GO:0016020	membrane
Mc4r	melanocortin 4 receptor [Source:MGI Symbol;Acc:MGI:99457]	GO:0004977	melanocortin receptor activity
Mc4r	melanocortin 4 receptor [Source:MGI Symbol;Acc:MGI:99457]	GO:0005515	protein binding
Mc4r	melanocortin 4 receptor [Source:MGI Symbol;Acc:MGI:99457]	GO:0030073	insulin secretion
Mc4r	melanocortin 4 receptor [Source:MGI Symbol;Acc:MGI:99457]	GO:0032868	response to insulin
Mc4r	melanocortin 4 receptor [Source:MGI Symbol;Acc:MGI:99457]	GO:0005886	plasma membrane
Mc4r	melanocortin 4 receptor [Source:MGI Symbol;Acc:MGI:99457]	GO:0005737	cytoplasm
Mc4r	melanocortin 4 receptor [Source:MGI Symbol;Acc:MGI:99457]	GO:0007189	adenylate cyclase-activating G protein-coupled receptor signaling pathway
Mc4r	melanocortin 4 receptor [Source:MGI Symbol;Acc:MGI:99457]	GO:0042562	hormone binding
Mc4r	melanocortin 4 receptor [Source:MGI Symbol;Acc:MGI:99457]	GO:0006112	energy reserve metabolic process
Mc4r	melanocortin 4 receptor [Source:MGI Symbol;Acc:MGI:99457]	GO:0007631	feeding behavior
Mc4r	melanocortin 4 receptor [Source:MGI Symbol;Acc:MGI:99457]	GO:0019222	regulation of metabolic process
Mc4r	melanocortin 4 receptor [Source:MGI Symbol;Acc:MGI:99457]	GO:2000252	negative regulation of feeding behavior
Mc4r	melanocortin 4 receptor [Source:MGI Symbol;Acc:MGI:99457]	GO:0017046	peptide hormone binding
Mc4r	melanocortin 4 receptor [Source:MGI Symbol;Acc:MGI:99457]	GO:1990680	response to melanocyte-stimulating hormone
Mc4r	melanocortin 4 receptor [Source:MGI Symbol;Acc:MGI:99457]	GO:0002024	diet induced thermogenesis
Mc4r	melanocortin 4 receptor [Source:MGI Symbol;Acc:MGI:99457]	GO:0004980	melanocyte-stimulating hormone receptor activity
Mc4r	melanocortin 4 receptor [Source:MGI Symbol;Acc:MGI:99457]	GO:0060259	regulation of feeding behavior
Mc4r	melanocortin 4 receptor [Source:MGI Symbol;Acc:MGI:99457]	GO:0031625	ubiquitin protein ligase binding
Mc4r	melanocortin 4 receptor [Source:MGI Symbol;Acc:MGI:99457]	GO:0042923	neuropeptide binding
Mc4r	melanocortin 4 receptor [Source:MGI Symbol;Acc:MGI:99457]	GO:0045780	positive regulation of bone resorption
Mc4r	melanocortin 4 receptor [Source:MGI Symbol;Acc:MGI:99457]	GO:1903925	response to bisphenol A
Mc4r	melanocortin 4 receptor [Source:MGI Symbol;Acc:MGI:99457]	GO:1903998	regulation of eating behavior
Mc4r	melanocortin 4 receptor [Source:MGI Symbol;Acc:MGI:99457]	GO:2000821	regulation of grooming behavior
Scn10a	sodium channel, voltage-gated, type X, alpha [Source:MGI Symbol;Acc:MGI:108029]	GO:0016020	membrane
Scn10a	sodium channel, voltage-gated, type X, alpha [Source:MGI Symbol;Acc:MGI:108029]	GO:0055085	transmembrane transport
Scn10a	sodium channel, voltage-gated, type X, alpha [Source:MGI Symbol;Acc:MGI:108029]	GO:0006811	monoatomic ion transport
Scn10a	sodium channel, voltage-gated, type X, alpha [Source:MGI Symbol;Acc:MGI:108029]	GO:0006814	sodium ion transport
Scn10a	sodium channel, voltage-gated, type X, alpha [Source:MGI Symbol;Acc:MGI:108029]	GO:0005886	plasma membrane
Scn10a	sodium channel, voltage-gated, type X, alpha [Source:MGI Symbol;Acc:MGI:108029]	GO:0005216	monoatomic ion channel activity
Scn10a	sodium channel, voltage-gated, type X, alpha [Source:MGI Symbol;Acc:MGI:108029]	GO:0005248	voltage-gated sodium channel activity
Scn10a	sodium channel, voltage-gated, type X, alpha [Source:MGI Symbol;Acc:MGI:108029]	GO:0001518	voltage-gated sodium channel complex
Scn10a	sodium channel, voltage-gated, type X, alpha [Source:MGI Symbol;Acc:MGI:108029]	GO:0005261	monoatomic cation channel activity
Scn10a	sodium channel, voltage-gated, type X, alpha [Source:MGI Symbol;Acc:MGI:108029]	GO:0034220	monoatomic ion transmembrane transport
Scn10a	sodium channel, voltage-gated, type X, alpha [Source:MGI Symbol;Acc:MGI:108029]	GO:0034702	monoatomic ion channel complex
Scn10a	sodium channel, voltage-gated, type X, alpha [Source:MGI Symbol;Acc:MGI:108029]	GO:0005272	sodium channel activity
Scn10a	sodium channel, voltage-gated, type X, alpha [Source:MGI Symbol;Acc:MGI:108029]	GO:0099505	regulation of presynaptic membrane potential
Scn10a	sodium channel, voltage-gated, type X, alpha [Source:MGI Symbol;Acc:MGI:108029]	GO:0044325	transmembrane transporter binding
Scn10a	sodium channel, voltage-gated, type X, alpha [Source:MGI Symbol;Acc:MGI:108029]	GO:0099508	voltage-gated monoatomic ion channel activity involved in regulation of presynaptic membrane potential
Scn10a	sodium channel, voltage-gated, type X, alpha [Source:MGI Symbol;Acc:MGI:108029]	GO:0002027	regulation of heart rate
Scn10a	sodium channel, voltage-gated, type X, alpha [Source:MGI Symbol;Acc:MGI:108029]	GO:0034765	regulation of monoatomic ion transmembrane transport
Scn10a	sodium channel, voltage-gated, type X, alpha [Source:MGI Symbol;Acc:MGI:108029]	GO:0035725	sodium ion transmembrane transport
Scn10a	sodium channel, voltage-gated, type X, alpha [Source:MGI Symbol;Acc:MGI:108029]	GO:0042475	odontogenesis of dentin-containing tooth
Scn10a	sodium channel, voltage-gated, type X, alpha [Source:MGI Symbol;Acc:MGI:108029]	GO:0055117	regulation of cardiac muscle contraction
Scn10a	sodium channel, voltage-gated, type X, alpha [Source:MGI Symbol;Acc:MGI:108029]	GO:0060371	regulation of atrial cardiac muscle cell membrane depolarization
Scn10a	sodium channel, voltage-gated, type X, alpha [Source:MGI Symbol;Acc:MGI:108029]	GO:0086010	membrane depolarization during action potential
Scn10a	sodium channel, voltage-gated, type X, alpha [Source:MGI Symbol;Acc:MGI:108029]	GO:0086016	AV node cell action potential
Scn10a	sodium channel, voltage-gated, type X, alpha [Source:MGI Symbol;Acc:MGI:108029]	GO:0086043	bundle of His cell action potential
Scn10a	sodium channel, voltage-gated, type X, alpha [Source:MGI Symbol;Acc:MGI:108029]	GO:0030424	axon
Scn10a	sodium channel, voltage-gated, type X, alpha [Source:MGI Symbol;Acc:MGI:108029]	GO:0042734	presynaptic membrane
Scn10a	sodium channel, voltage-gated, type X, alpha [Source:MGI Symbol;Acc:MGI:108029]	GO:0098978	glutamatergic synapse
Scn10a	sodium channel, voltage-gated, type X, alpha [Source:MGI Symbol;Acc:MGI:108029]	GO:0071439	clathrin complex
Scn10a	sodium channel, voltage-gated, type X, alpha [Source:MGI Symbol;Acc:MGI:108029]	GO:0061337	cardiac conduction
Scn10a	sodium channel, voltage-gated, type X, alpha [Source:MGI Symbol;Acc:MGI:108029]	GO:0051649	establishment of localization in cell
Scn10a	sodium channel, voltage-gated, type X, alpha [Source:MGI Symbol;Acc:MGI:108029]	GO:0050965	detection of temperature stimulus involved in sensory perception of pain
Scn10a	sodium channel, voltage-gated, type X, alpha [Source:MGI Symbol;Acc:MGI:108029]	GO:0007623	circadian rhythm
Scn10a	sodium channel, voltage-gated, type X, alpha [Source:MGI Symbol;Acc:MGI:108029]	GO:0019228	neuronal action potential
Scn10a	sodium channel, voltage-gated, type X, alpha [Source:MGI Symbol;Acc:MGI:108029]	GO:0048266	behavioral response to pain
Scn10a	sodium channel, voltage-gated, type X, alpha [Source:MGI Symbol;Acc:MGI:108029]	GO:0050974	detection of mechanical stimulus involved in sensory perception
Scn10a	sodium channel, voltage-gated, type X, alpha [Source:MGI Symbol;Acc:MGI:108029]	GO:0044299	C-fiber
Scn10a	sodium channel, voltage-gated, type X, alpha [Source:MGI Symbol;Acc:MGI:108029]	GO:0086006	voltage-gated sodium channel activity involved in cardiac muscle cell action potential
Scn10a	sodium channel, voltage-gated, type X, alpha [Source:MGI Symbol;Acc:MGI:108029]	GO:0086012	membrane depolarization during cardiac muscle cell action potential
Scn10a	sodium channel, voltage-gated, type X, alpha [Source:MGI Symbol;Acc:MGI:108029]
Itgam	integrin alpha M [Source:MGI Symbol;Acc:MGI:96607]	GO:0007155	cell adhesion
Itgam	integrin alpha M [Source:MGI Symbol;Acc:MGI:96607]	GO:0008305	integrin complex
Itgam	integrin alpha M [Source:MGI Symbol;Acc:MGI:96607]	GO:0016020	membrane
Itgam	integrin alpha M [Source:MGI Symbol;Acc:MGI:96607]	GO:0046872	metal ion binding
Itgam	integrin alpha M [Source:MGI Symbol;Acc:MGI:96607]	GO:0007229	integrin-mediated signaling pathway
Itgam	integrin alpha M [Source:MGI Symbol;Acc:MGI:96607]	GO:0031072	heat shock protein binding
Itgam	integrin alpha M [Source:MGI Symbol;Acc:MGI:96607]	GO:0044877	protein-containing complex binding
Itgam	integrin alpha M [Source:MGI Symbol;Acc:MGI:96607]	GO:0002931	response to ischemia
Itgam	integrin alpha M [Source:MGI Symbol;Acc:MGI:96607]	GO:0007160	cell-matrix adhesion
Itgam	integrin alpha M [Source:MGI Symbol;Acc:MGI:96607]	GO:0009612	response to mechanical stimulus
Itgam	integrin alpha M [Source:MGI Symbol;Acc:MGI:96607]	GO:0010668	ectodermal cell differentiation
Itgam	integrin alpha M [Source:MGI Symbol;Acc:MGI:96607]	GO:0032355	response to estradiol
Itgam	integrin alpha M [Source:MGI Symbol;Acc:MGI:96607]	GO:0032930	positive regulation of superoxide anion generation
Itgam	integrin alpha M [Source:MGI Symbol;Acc:MGI:96607]	GO:0034113	heterotypic cell-cell adhesion
Itgam	integrin alpha M [Source:MGI Symbol;Acc:MGI:96607]	GO:0043315	positive regulation of neutrophil degranulation
Itgam	integrin alpha M [Source:MGI Symbol;Acc:MGI:96607]	GO:0140459	response to Gram-positive bacterium
Itgam	integrin alpha M [Source:MGI Symbol;Acc:MGI:96607]	GO:1904643	response to curcumin
Itgam	integrin alpha M [Source:MGI Symbol;Acc:MGI:96607]	GO:0005615	extracellular space
Itgam	integrin alpha M [Source:MGI Symbol;Acc:MGI:96607]	GO:0005886	plasma membrane
Itgam	integrin alpha M [Source:MGI Symbol;Acc:MGI:96607]	GO:0009986	cell surface
Itgam	integrin alpha M [Source:MGI Symbol;Acc:MGI:96607]	GO:0044853	plasma membrane raft
Itgam	integrin alpha M [Source:MGI Symbol;Acc:MGI:96607]	GO:0034688	integrin alphaM-beta2 complex
Itgam	integrin alpha M [Source:MGI Symbol;Acc:MGI:96607]
Neurog2	neurogenin 2 [Source:MGI Symbol;Acc:MGI:109619]	GO:0046983	protein dimerization activity
Neurog2	neurogenin 2 [Source:MGI Symbol;Acc:MGI:109619]	GO:1990837	sequence-specific double-stranded DNA binding
Npas4	neuronal PAS domain protein 4 [Source:MGI Symbol;Acc:MGI:2664186]
Npas4	neuronal PAS domain protein 4 [Source:MGI Symbol;Acc:MGI:2664186]	GO:0005515	protein binding
Npas4	neuronal PAS domain protein 4 [Source:MGI Symbol;Acc:MGI:2664186]	GO:0046983	protein dimerization activity
Npas4	neuronal PAS domain protein 4 [Source:MGI Symbol;Acc:MGI:2664186]	GO:0005634	nucleus
Npas4	neuronal PAS domain protein 4 [Source:MGI Symbol;Acc:MGI:2664186]	GO:0045944	positive regulation of transcription by RNA polymerase II
Npas4	neuronal PAS domain protein 4 [Source:MGI Symbol;Acc:MGI:2664186]	GO:0044877	protein-containing complex binding
Npas4	neuronal PAS domain protein 4 [Source:MGI Symbol;Acc:MGI:2664186]	GO:0000978	RNA polymerase II cis-regulatory region sequence-specific DNA binding
Npas4	neuronal PAS domain protein 4 [Source:MGI Symbol;Acc:MGI:2664186]	GO:0003677	DNA binding
Npas4	neuronal PAS domain protein 4 [Source:MGI Symbol;Acc:MGI:2664186]	GO:0007399	nervous system development
Npas4	neuronal PAS domain protein 4 [Source:MGI Symbol;Acc:MGI:2664186]	GO:0000981	DNA-binding transcription factor activity, RNA polymerase II-specific
Npas4	neuronal PAS domain protein 4 [Source:MGI Symbol;Acc:MGI:2664186]	GO:0006357	regulation of transcription by RNA polymerase II
Npas4	neuronal PAS domain protein 4 [Source:MGI Symbol;Acc:MGI:2664186]	GO:0030154	cell differentiation
Npas4	neuronal PAS domain protein 4 [Source:MGI Symbol;Acc:MGI:2664186]	GO:0000977	RNA polymerase II transcription regulatory region sequence-specific DNA binding
Npas4	neuronal PAS domain protein 4 [Source:MGI Symbol;Acc:MGI:2664186]	GO:0006355	regulation of DNA-templated transcription
Npas4	neuronal PAS domain protein 4 [Source:MGI Symbol;Acc:MGI:2664186]	GO:0045893	positive regulation of DNA-templated transcription
Npas4	neuronal PAS domain protein 4 [Source:MGI Symbol;Acc:MGI:2664186]	GO:0098794	postsynapse
Npas4	neuronal PAS domain protein 4 [Source:MGI Symbol;Acc:MGI:2664186]	GO:0046982	protein heterodimerization activity
Npas4	neuronal PAS domain protein 4 [Source:MGI Symbol;Acc:MGI:2664186]	GO:0005654	nucleoplasm
Npas4	neuronal PAS domain protein 4 [Source:MGI Symbol;Acc:MGI:2664186]	GO:0005667	transcription regulator complex
Npas4	neuronal PAS domain protein 4 [Source:MGI Symbol;Acc:MGI:2664186]	GO:0048167	regulation of synaptic plasticity
Npas4	neuronal PAS domain protein 4 [Source:MGI Symbol;Acc:MGI:2664186]	GO:0060080	inhibitory postsynaptic potential
Npas4	neuronal PAS domain protein 4 [Source:MGI Symbol;Acc:MGI:2664186]	GO:0007612	learning
Npas4	neuronal PAS domain protein 4 [Source:MGI Symbol;Acc:MGI:2664186]	GO:0035176	social behavior
Npas4	neuronal PAS domain protein 4 [Source:MGI Symbol;Acc:MGI:2664186]	GO:1904862	inhibitory synapse assembly
Npas4	neuronal PAS domain protein 4 [Source:MGI Symbol;Acc:MGI:2664186]	GO:0007616	long-term memory
Npas4	neuronal PAS domain protein 4 [Source:MGI Symbol;Acc:MGI:2664186]	GO:0032228	regulation of synaptic transmission, GABAergic
Npas4	neuronal PAS domain protein 4 [Source:MGI Symbol;Acc:MGI:2664186]	GO:0007614	short-term memory
Npas4	neuronal PAS domain protein 4 [Source:MGI Symbol;Acc:MGI:2664186]	GO:0071386	cellular response to corticosterone stimulus
Npas4	neuronal PAS domain protein 4 [Source:MGI Symbol;Acc:MGI:2664186]	GO:0001228	DNA-binding transcription activator activity, RNA polymerase II-specific
Npas4	neuronal PAS domain protein 4 [Source:MGI Symbol;Acc:MGI:2664186]	GO:0060079	excitatory postsynaptic potential
Trem2	triggering receptor expressed on myeloid cells 2 [Source:MGI Symbol;Acc:MGI:1913150]	GO:0071456	cellular response to hypoxia
Trem2	triggering receptor expressed on myeloid cells 2 [Source:MGI Symbol;Acc:MGI:1913150]	GO:0005515	protein binding
Trem2	triggering receptor expressed on myeloid cells 2 [Source:MGI Symbol;Acc:MGI:1913150]	GO:0071333	cellular response to glucose stimulus
Trem2	triggering receptor expressed on myeloid cells 2 [Source:MGI Symbol;Acc:MGI:1913150]	GO:0005886	plasma membrane
Trem2	triggering receptor expressed on myeloid cells 2 [Source:MGI Symbol;Acc:MGI:1913150]	GO:0042742	defense response to bacterium
Trem2	triggering receptor expressed on myeloid cells 2 [Source:MGI Symbol;Acc:MGI:1913150]	GO:0005576	extracellular region
Trem2	triggering receptor expressed on myeloid cells 2 [Source:MGI Symbol;Acc:MGI:1913150]	GO:0010468	regulation of gene expression
Trem2	triggering receptor expressed on myeloid cells 2 [Source:MGI Symbol;Acc:MGI:1913150]	GO:0008289	lipid binding
Trem2	triggering receptor expressed on myeloid cells 2 [Source:MGI Symbol;Acc:MGI:1913150]	GO:0045088	regulation of innate immune response
Trem2	triggering receptor expressed on myeloid cells 2 [Source:MGI Symbol;Acc:MGI:1913150]	GO:0030316	osteoclast differentiation
Trem2	triggering receptor expressed on myeloid cells 2 [Source:MGI Symbol;Acc:MGI:1913150]	GO:0071526	semaphorin-plexin signaling pathway
Trem2	triggering receptor expressed on myeloid cells 2 [Source:MGI Symbol;Acc:MGI:1913150]	GO:0070374	positive regulation of ERK1 and ERK2 cascade
Trem2	triggering receptor expressed on myeloid cells 2 [Source:MGI Symbol;Acc:MGI:1913150]	GO:0043066	negative regulation of apoptotic process
Trem2	triggering receptor expressed on myeloid cells 2 [Source:MGI Symbol;Acc:MGI:1913150]	GO:0017154	semaphorin receptor activity
Trem2	triggering receptor expressed on myeloid cells 2 [Source:MGI Symbol;Acc:MGI:1913150]	GO:0010628	positive regulation of gene expression
Trem2	triggering receptor expressed on myeloid cells 2 [Source:MGI Symbol;Acc:MGI:1913150]	GO:0045672	positive regulation of osteoclast differentiation
Trem2	triggering receptor expressed on myeloid cells 2 [Source:MGI Symbol;Acc:MGI:1913150]	GO:0002931	response to ischemia
Trem2	triggering receptor expressed on myeloid cells 2 [Source:MGI Symbol;Acc:MGI:1913150]	GO:0032733	positive regulation of interleukin-10 production
Trem2	triggering receptor expressed on myeloid cells 2 [Source:MGI Symbol;Acc:MGI:1913150]	GO:0032720	negative regulation of tumor necrosis factor production
Trem2	triggering receptor expressed on myeloid cells 2 [Source:MGI Symbol;Acc:MGI:1913150]	GO:0051898	negative regulation of phosphatidylinositol 3-kinase/protein kinase B signal transduction
Trem2	triggering receptor expressed on myeloid cells 2 [Source:MGI Symbol;Acc:MGI:1913150]	GO:0001786	phosphatidylserine binding
Trem2	triggering receptor expressed on myeloid cells 2 [Source:MGI Symbol;Acc:MGI:1913150]	GO:1901224	positive regulation of non-canonical NF-kappaB signal transduction
Trem2	triggering receptor expressed on myeloid cells 2 [Source:MGI Symbol;Acc:MGI:1913150]	GO:1904646	cellular response to amyloid-beta
Trem2	triggering receptor expressed on myeloid cells 2 [Source:MGI Symbol;Acc:MGI:1913150]	GO:0002282	microglial cell activation involved in immune response
Trem2	triggering receptor expressed on myeloid cells 2 [Source:MGI Symbol;Acc:MGI:1913150]	GO:0002291	T cell activation via T cell receptor contact with antigen bound to MHC molecule on antigen presenting cell
Trem2	triggering receptor expressed on myeloid cells 2 [Source:MGI Symbol;Acc:MGI:1913150]	GO:0034241	positive regulation of macrophage fusion
Trem2	triggering receptor expressed on myeloid cells 2 [Source:MGI Symbol;Acc:MGI:1913150]	GO:0043277	apoptotic cell clearance
Trem2	triggering receptor expressed on myeloid cells 2 [Source:MGI Symbol;Acc:MGI:1913150]	GO:0048678	response to axon injury
Trem2	triggering receptor expressed on myeloid cells 2 [Source:MGI Symbol;Acc:MGI:1913150]	GO:1903980	positive regulation of microglial cell activation
Trem2	triggering receptor expressed on myeloid cells 2 [Source:MGI Symbol;Acc:MGI:1913150]	GO:0001774	microglial cell activation
Trem2	triggering receptor expressed on myeloid cells 2 [Source:MGI Symbol;Acc:MGI:1913150]	GO:0006911	phagocytosis, engulfment
Trem2	triggering receptor expressed on myeloid cells 2 [Source:MGI Symbol;Acc:MGI:1913150]	GO:0150076	neuroinflammatory response
Trem2	triggering receptor expressed on myeloid cells 2 [Source:MGI Symbol;Acc:MGI:1913150]	GO:0005543	phospholipid binding
Trem2	triggering receptor expressed on myeloid cells 2 [Source:MGI Symbol;Acc:MGI:1913150]	GO:0060100	positive regulation of phagocytosis, engulfment
Trem2	triggering receptor expressed on myeloid cells 2 [Source:MGI Symbol;Acc:MGI:1913150]	GO:0048143	astrocyte activation
Trem2	triggering receptor expressed on myeloid cells 2 [Source:MGI Symbol;Acc:MGI:1913150]	GO:0050766	positive regulation of phagocytosis
Trem2	triggering receptor expressed on myeloid cells 2 [Source:MGI Symbol;Acc:MGI:1913150]	GO:0038023	signaling receptor activity
Trem2	triggering receptor expressed on myeloid cells 2 [Source:MGI Symbol;Acc:MGI:1913150]	GO:0050730	regulation of peptidyl-tyrosine phosphorylation
Trem2	triggering receptor expressed on myeloid cells 2 [Source:MGI Symbol;Acc:MGI:1913150]	GO:1900223	positive regulation of amyloid-beta clearance
Trem2	triggering receptor expressed on myeloid cells 2 [Source:MGI Symbol;Acc:MGI:1913150]	GO:2001171	positive regulation of ATP biosynthetic process
Trem2	triggering receptor expressed on myeloid cells 2 [Source:MGI Symbol;Acc:MGI:1913150]	GO:0010875	positive regulation of cholesterol efflux
Trem2	triggering receptor expressed on myeloid cells 2 [Source:MGI Symbol;Acc:MGI:1913150]	GO:0004888	transmembrane signaling receptor activity
Trem2	triggering receptor expressed on myeloid cells 2 [Source:MGI Symbol;Acc:MGI:1913150]	GO:0001530	lipopolysaccharide binding
Trem2	triggering receptor expressed on myeloid cells 2 [Source:MGI Symbol;Acc:MGI:1913150]	GO:0150079	negative regulation of neuroinflammatory response
Trem2	triggering receptor expressed on myeloid cells 2 [Source:MGI Symbol;Acc:MGI:1913150]	GO:0050829	defense response to Gram-negative bacterium
Trem2	triggering receptor expressed on myeloid cells 2 [Source:MGI Symbol;Acc:MGI:1913150]	GO:0061889	negative regulation of astrocyte activation
Trem2	triggering receptor expressed on myeloid cells 2 [Source:MGI Symbol;Acc:MGI:1913150]	GO:0150094	amyloid-beta clearance by cellular catabolic process
Trem2	triggering receptor expressed on myeloid cells 2 [Source:MGI Symbol;Acc:MGI:1913150]	GO:1905907	negative regulation of amyloid fibril formation
Trem2	triggering receptor expressed on myeloid cells 2 [Source:MGI Symbol;Acc:MGI:1913150]	GO:0045087	innate immune response
Trem2	triggering receptor expressed on myeloid cells 2 [Source:MGI Symbol;Acc:MGI:1913150]	GO:0001934	positive regulation of protein phosphorylation
Trem2	triggering receptor expressed on myeloid cells 2 [Source:MGI Symbol;Acc:MGI:1913150]	GO:0030215	semaphorin receptor binding
Trem2	triggering receptor expressed on myeloid cells 2 [Source:MGI Symbol;Acc:MGI:1913150]	GO:0120035	regulation of plasma membrane bounded cell projection organization
Trem2	triggering receptor expressed on myeloid cells 2 [Source:MGI Symbol;Acc:MGI:1913150]	GO:1900016	negative regulation of cytokine production involved in inflammatory response
Trem2	triggering receptor expressed on myeloid cells 2 [Source:MGI Symbol;Acc:MGI:1913150]	GO:0032691	negative regulation of interleukin-1 beta production
Trem2	triggering receptor expressed on myeloid cells 2 [Source:MGI Symbol;Acc:MGI:1913150]	GO:0061518	microglial cell proliferation
Trem2	triggering receptor expressed on myeloid cells 2 [Source:MGI Symbol;Acc:MGI:1913150]	GO:1901800	positive regulation of proteasomal protein catabolic process
Trem2	triggering receptor expressed on myeloid cells 2 [Source:MGI Symbol;Acc:MGI:1913150]	GO:1990782	protein tyrosine kinase binding
Trem2	triggering receptor expressed on myeloid cells 2 [Source:MGI Symbol;Acc:MGI:1913150]	GO:1900226	negative regulation of NLRP3 inflammasome complex assembly
Trem2	triggering receptor expressed on myeloid cells 2 [Source:MGI Symbol;Acc:MGI:1913150]	GO:0070269	pyroptosis
Trem2	triggering receptor expressed on myeloid cells 2 [Source:MGI Symbol;Acc:MGI:1913150]	GO:0038160	CXCL12-activated CXCR4 signaling pathway
Trem2	triggering receptor expressed on myeloid cells 2 [Source:MGI Symbol;Acc:MGI:1913150]	GO:0035176	social behavior
Trem2	triggering receptor expressed on myeloid cells 2 [Source:MGI Symbol;Acc:MGI:1913150]	GO:0019209	kinase activator activity
Trem2	triggering receptor expressed on myeloid cells 2 [Source:MGI Symbol;Acc:MGI:1913150]	GO:0042834	peptidoglycan binding
Trem2	triggering receptor expressed on myeloid cells 2 [Source:MGI Symbol;Acc:MGI:1913150]	GO:0070891	lipoteichoic acid binding
Trem2	triggering receptor expressed on myeloid cells 2 [Source:MGI Symbol;Acc:MGI:1913150]	GO:0120146	sulfatide binding
Trem2	triggering receptor expressed on myeloid cells 2 [Source:MGI Symbol;Acc:MGI:1913150]	GO:0002862	negative regulation of inflammatory response to antigenic stimulus
Trem2	triggering receptor expressed on myeloid cells 2 [Source:MGI Symbol;Acc:MGI:1913150]	GO:0010507	negative regulation of autophagy
Trem2	triggering receptor expressed on myeloid cells 2 [Source:MGI Symbol;Acc:MGI:1913150]	GO:0010887	negative regulation of cholesterol storage
Trem2	triggering receptor expressed on myeloid cells 2 [Source:MGI Symbol;Acc:MGI:1913150]	GO:0010891	negative regulation of sequestering of triglyceride
Trem2	triggering receptor expressed on myeloid cells 2 [Source:MGI Symbol;Acc:MGI:1913150]	GO:0010983	positive regulation of high-density lipoprotein particle clearance
Trem2	triggering receptor expressed on myeloid cells 2 [Source:MGI Symbol;Acc:MGI:1913150]	GO:0031663	lipopolysaccharide-mediated signaling pathway
Trem2	triggering receptor expressed on myeloid cells 2 [Source:MGI Symbol;Acc:MGI:1913150]	GO:0032006	regulation of TOR signaling
Trem2	triggering receptor expressed on myeloid cells 2 [Source:MGI Symbol;Acc:MGI:1913150]	GO:0032008	positive regulation of TOR signaling
Trem2	triggering receptor expressed on myeloid cells 2 [Source:MGI Symbol;Acc:MGI:1913150]	GO:0032497	detection of lipopolysaccharide
Trem2	triggering receptor expressed on myeloid cells 2 [Source:MGI Symbol;Acc:MGI:1913150]	GO:0032499	detection of peptidoglycan
Trem2	triggering receptor expressed on myeloid cells 2 [Source:MGI Symbol;Acc:MGI:1913150]	GO:0032675	regulation of interleukin-6 production
Trem2	triggering receptor expressed on myeloid cells 2 [Source:MGI Symbol;Acc:MGI:1913150]	GO:0034136	negative regulation of toll-like receptor 2 signaling pathway
Trem2	triggering receptor expressed on myeloid cells 2 [Source:MGI Symbol;Acc:MGI:1913150]	GO:0034144	negative regulation of toll-like receptor 4 signaling pathway
Trem2	triggering receptor expressed on myeloid cells 2 [Source:MGI Symbol;Acc:MGI:1913150]	GO:0034151	regulation of toll-like receptor 6 signaling pathway
Trem2	triggering receptor expressed on myeloid cells 2 [Source:MGI Symbol;Acc:MGI:1913150]	GO:0034351	negative regulation of glial cell apoptotic process
Trem2	triggering receptor expressed on myeloid cells 2 [Source:MGI Symbol;Acc:MGI:1913150]	GO:0043124	negative regulation of canonical NF-kappaB signal transduction
Trem2	triggering receptor expressed on myeloid cells 2 [Source:MGI Symbol;Acc:MGI:1913150]	GO:0045728	respiratory burst after phagocytosis
Trem2	triggering receptor expressed on myeloid cells 2 [Source:MGI Symbol;Acc:MGI:1913150]	GO:0045960	positive regulation of complement activation, classical pathway
Trem2	triggering receptor expressed on myeloid cells 2 [Source:MGI Symbol;Acc:MGI:1913150]	GO:0050850	positive regulation of calcium-mediated signaling
Trem2	triggering receptor expressed on myeloid cells 2 [Source:MGI Symbol;Acc:MGI:1913150]	GO:0050866	negative regulation of cell activation
Trem2	triggering receptor expressed on myeloid cells 2 [Source:MGI Symbol;Acc:MGI:1913150]	GO:0050921	positive regulation of chemotaxis
Trem2	triggering receptor expressed on myeloid cells 2 [Source:MGI Symbol;Acc:MGI:1913150]	GO:0051897	positive regulation of phosphatidylinositol 3-kinase/protein kinase B signal transduction
Trem2	triggering receptor expressed on myeloid cells 2 [Source:MGI Symbol;Acc:MGI:1913150]	GO:0055088	lipid homeostasis
Trem2	triggering receptor expressed on myeloid cells 2 [Source:MGI Symbol;Acc:MGI:1913150]	GO:0060075	regulation of resting membrane potential
Trem2	triggering receptor expressed on myeloid cells 2 [Source:MGI Symbol;Acc:MGI:1913150]	GO:0070345	negative regulation of fat cell proliferation
Trem2	triggering receptor expressed on myeloid cells 2 [Source:MGI Symbol;Acc:MGI:1913150]	GO:0070392	detection of lipoteichoic acid
Trem2	triggering receptor expressed on myeloid cells 2 [Source:MGI Symbol;Acc:MGI:1913150]	GO:0071223	cellular response to lipoteichoic acid
Trem2	triggering receptor expressed on myeloid cells 2 [Source:MGI Symbol;Acc:MGI:1913150]	GO:0071224	cellular response to peptidoglycan
Trem2	triggering receptor expressed on myeloid cells 2 [Source:MGI Symbol;Acc:MGI:1913150]	GO:0071640	regulation of macrophage inflammatory protein 1 alpha production
Trem2	triggering receptor expressed on myeloid cells 2 [Source:MGI Symbol;Acc:MGI:1913150]	GO:0097062	dendritic spine maintenance
Trem2	triggering receptor expressed on myeloid cells 2 [Source:MGI Symbol;Acc:MGI:1913150]	GO:0097242	amyloid-beta clearance
Trem2	triggering receptor expressed on myeloid cells 2 [Source:MGI Symbol;Acc:MGI:1913150]	GO:0098657	import into cell
Trem2	triggering receptor expressed on myeloid cells 2 [Source:MGI Symbol;Acc:MGI:1913150]	GO:0110089	regulation of hippocampal neuron apoptotic process
Trem2	triggering receptor expressed on myeloid cells 2 [Source:MGI Symbol;Acc:MGI:1913150]	GO:0150062	complement-mediated synapse pruning
Trem2	triggering receptor expressed on myeloid cells 2 [Source:MGI Symbol;Acc:MGI:1913150]	GO:0150078	positive regulation of neuroinflammatory response
Trem2	triggering receptor expressed on myeloid cells 2 [Source:MGI Symbol;Acc:MGI:1913150]	GO:1900015	regulation of cytokine production involved in inflammatory response
Trem2	triggering receptor expressed on myeloid cells 2 [Source:MGI Symbol;Acc:MGI:1913150]	GO:1901980	positive regulation of inward rectifier potassium channel activity
Trem2	triggering receptor expressed on myeloid cells 2 [Source:MGI Symbol;Acc:MGI:1913150]	GO:1902227	negative regulation of macrophage colony-stimulating factor signaling pathway
Trem2	triggering receptor expressed on myeloid cells 2 [Source:MGI Symbol;Acc:MGI:1913150]	GO:1902531	regulation of intracellular signal transduction
Trem2	triggering receptor expressed on myeloid cells 2 [Source:MGI Symbol;Acc:MGI:1913150]	GO:1903376	regulation of oxidative stress-induced neuron intrinsic apoptotic signaling pathway
Trem2	triggering receptor expressed on myeloid cells 2 [Source:MGI Symbol;Acc:MGI:1913150]	GO:1903753	negative regulation of p38MAPK cascade
Trem2	triggering receptor expressed on myeloid cells 2 [Source:MGI Symbol;Acc:MGI:1913150]	GO:1904093	negative regulation of autophagic cell death
Trem2	triggering receptor expressed on myeloid cells 2 [Source:MGI Symbol;Acc:MGI:1913150]	GO:1904141	positive regulation of microglial cell migration
Trem2	triggering receptor expressed on myeloid cells 2 [Source:MGI Symbol;Acc:MGI:1913150]	GO:1904951	positive regulation of establishment of protein localization
Trem2	triggering receptor expressed on myeloid cells 2 [Source:MGI Symbol;Acc:MGI:1913150]	GO:1905291	positive regulation of CAMKK-AMPK signaling cascade
Trem2	triggering receptor expressed on myeloid cells 2 [Source:MGI Symbol;Acc:MGI:1913150]	GO:1905581	positive regulation of low-density lipoprotein particle clearance
Trem2	triggering receptor expressed on myeloid cells 2 [Source:MGI Symbol;Acc:MGI:1913150]	GO:1905805	excitatory synapse pruning
Trem2	triggering receptor expressed on myeloid cells 2 [Source:MGI Symbol;Acc:MGI:1913150]	GO:1905808	positive regulation of synapse pruning
Trem2	triggering receptor expressed on myeloid cells 2 [Source:MGI Symbol;Acc:MGI:1913150]
Trem2	triggering receptor expressed on myeloid cells 2 [Source:MGI Symbol;Acc:MGI:1913150]	GO:0001540	amyloid-beta binding
Trem2	triggering receptor expressed on myeloid cells 2 [Source:MGI Symbol;Acc:MGI:1913150]	GO:0008013	beta-catenin binding
Trem2	triggering receptor expressed on myeloid cells 2 [Source:MGI Symbol;Acc:MGI:1913150]	GO:0008035	high-density lipoprotein particle binding
Trem2	triggering receptor expressed on myeloid cells 2 [Source:MGI Symbol;Acc:MGI:1913150]	GO:0008429	phosphatidylethanolamine binding
Trem2	triggering receptor expressed on myeloid cells 2 [Source:MGI Symbol;Acc:MGI:1913150]	GO:0030169	low-density lipoprotein particle binding
Trem2	triggering receptor expressed on myeloid cells 2 [Source:MGI Symbol;Acc:MGI:1913150]	GO:0034185	apolipoprotein binding
Trem2	triggering receptor expressed on myeloid cells 2 [Source:MGI Symbol;Acc:MGI:1913150]	GO:0034186	apolipoprotein A-I binding
Trem2	triggering receptor expressed on myeloid cells 2 [Source:MGI Symbol;Acc:MGI:1913150]	GO:0034189	very-low-density lipoprotein particle binding
Trem2	triggering receptor expressed on myeloid cells 2 [Source:MGI Symbol;Acc:MGI:1913150]	GO:0044877	protein-containing complex binding
Trem2	triggering receptor expressed on myeloid cells 2 [Source:MGI Symbol;Acc:MGI:1913150]	GO:0071813	lipoprotein particle binding
Trem2	triggering receptor expressed on myeloid cells 2 [Source:MGI Symbol;Acc:MGI:1913150]	GO:0097110	scaffold protein binding
Trem2	triggering receptor expressed on myeloid cells 2 [Source:MGI Symbol;Acc:MGI:1913150]	GO:0002588	positive regulation of antigen processing and presentation of peptide antigen via MHC class II
Trem2	triggering receptor expressed on myeloid cells 2 [Source:MGI Symbol;Acc:MGI:1913150]	GO:0006910	phagocytosis, recognition
Trem2	triggering receptor expressed on myeloid cells 2 [Source:MGI Symbol;Acc:MGI:1913150]	GO:0007613	memory
Trem2	triggering receptor expressed on myeloid cells 2 [Source:MGI Symbol;Acc:MGI:1913150]	GO:0019216	regulation of lipid metabolic process
Trem2	triggering receptor expressed on myeloid cells 2 [Source:MGI Symbol;Acc:MGI:1913150]	GO:0050714	positive regulation of protein secretion
Trem2	triggering receptor expressed on myeloid cells 2 [Source:MGI Symbol;Acc:MGI:1913150]	GO:0050731	positive regulation of peptidyl-tyrosine phosphorylation
Trem2	triggering receptor expressed on myeloid cells 2 [Source:MGI Symbol;Acc:MGI:1913150]	GO:0071396	cellular response to lipid
Trem2	triggering receptor expressed on myeloid cells 2 [Source:MGI Symbol;Acc:MGI:1913150]	GO:0071402	cellular response to lipoprotein particle stimulus
Trem2	triggering receptor expressed on myeloid cells 2 [Source:MGI Symbol;Acc:MGI:1913150]	GO:0097028	dendritic cell differentiation
Trem2	triggering receptor expressed on myeloid cells 2 [Source:MGI Symbol;Acc:MGI:1913150]	GO:0140052	cellular response to oxidised low-density lipoprotein particle stimulus
Trem2	triggering receptor expressed on myeloid cells 2 [Source:MGI Symbol;Acc:MGI:1913150]	GO:1901076	positive regulation of engulfment of apoptotic cell
Trem2	triggering receptor expressed on myeloid cells 2 [Source:MGI Symbol;Acc:MGI:1913150]	GO:1903078	positive regulation of protein localization to plasma membrane
Trem2	triggering receptor expressed on myeloid cells 2 [Source:MGI Symbol;Acc:MGI:1913150]	GO:1903082	positive regulation of C-C chemokine receptor CCR7 signaling pathway
Trem2	triggering receptor expressed on myeloid cells 2 [Source:MGI Symbol;Acc:MGI:1913150]	GO:2000350	positive regulation of CD40 signaling pathway
Trem2	triggering receptor expressed on myeloid cells 2 [Source:MGI Symbol;Acc:MGI:1913150]	GO:0016020	membrane
Trem2	triggering receptor expressed on myeloid cells 2 [Source:MGI Symbol;Acc:MGI:1913150]	GO:0044853	plasma membrane raft
Fgf17	fibroblast growth factor 17 [Source:MGI Symbol;Acc:MGI:1202401]	GO:0008083	growth factor activity
Fgf17	fibroblast growth factor 17 [Source:MGI Symbol;Acc:MGI:1202401]	GO:0008284	positive regulation of cell population proliferation
Fgf17	fibroblast growth factor 17 [Source:MGI Symbol;Acc:MGI:1202401]	GO:0005615	extracellular space
Fgf17	fibroblast growth factor 17 [Source:MGI Symbol;Acc:MGI:1202401]	GO:0005576	extracellular region
Fgf17	fibroblast growth factor 17 [Source:MGI Symbol;Acc:MGI:1202401]	GO:0007165	signal transduction
Fgf17	fibroblast growth factor 17 [Source:MGI Symbol;Acc:MGI:1202401]	GO:0005737	cytoplasm
Fgf17	fibroblast growth factor 17 [Source:MGI Symbol;Acc:MGI:1202401]	GO:0030154	cell differentiation
Fgf17	fibroblast growth factor 17 [Source:MGI Symbol;Acc:MGI:1202401]	GO:0030334	regulation of cell migration
Fgf17	fibroblast growth factor 17 [Source:MGI Symbol;Acc:MGI:1202401]	GO:0008543	fibroblast growth factor receptor signaling pathway
Fgf17	fibroblast growth factor 17 [Source:MGI Symbol;Acc:MGI:1202401]	GO:0010628	positive regulation of gene expression
Fgf17	fibroblast growth factor 17 [Source:MGI Symbol;Acc:MGI:1202401]	GO:0009887	animal organ morphogenesis
Fgf17	fibroblast growth factor 17 [Source:MGI Symbol;Acc:MGI:1202401]	GO:0005111	type 2 fibroblast growth factor receptor binding
Fgf17	fibroblast growth factor 17 [Source:MGI Symbol;Acc:MGI:1202401]	GO:0043410	positive regulation of MAPK cascade
Fgf17	fibroblast growth factor 17 [Source:MGI Symbol;Acc:MGI:1202401]	GO:0005105	type 1 fibroblast growth factor receptor binding
Cx3cr1	C-X3-C motif chemokine receptor 1 [Source:MGI Symbol;Acc:MGI:1333815]	GO:0004930	G protein-coupled receptor activity
Cx3cr1	C-X3-C motif chemokine receptor 1 [Source:MGI Symbol;Acc:MGI:1333815]	GO:0007186	G protein-coupled receptor signaling pathway
Cx3cr1	C-X3-C motif chemokine receptor 1 [Source:MGI Symbol;Acc:MGI:1333815]	GO:0016020	membrane
Cx3cr1	C-X3-C motif chemokine receptor 1 [Source:MGI Symbol;Acc:MGI:1333815]	GO:0007155	cell adhesion
Cx3cr1	C-X3-C motif chemokine receptor 1 [Source:MGI Symbol;Acc:MGI:1333815]	GO:0006935	chemotaxis
Cx3cr1	C-X3-C motif chemokine receptor 1 [Source:MGI Symbol;Acc:MGI:1333815]	GO:0016495	C-X3-C chemokine receptor activity
Cx3cr1	C-X3-C motif chemokine receptor 1 [Source:MGI Symbol;Acc:MGI:1333815]	GO:0045766	positive regulation of angiogenesis
Cx3cr1	C-X3-C motif chemokine receptor 1 [Source:MGI Symbol;Acc:MGI:1333815]	GO:0071356	cellular response to tumor necrosis factor
Cx3cr1	C-X3-C motif chemokine receptor 1 [Source:MGI Symbol;Acc:MGI:1333815]	GO:0002931	response to ischemia
Cx3cr1	C-X3-C motif chemokine receptor 1 [Source:MGI Symbol;Acc:MGI:1333815]	GO:0051897	positive regulation of phosphatidylinositol 3-kinase/protein kinase B signal transduction
Cx3cr1	C-X3-C motif chemokine receptor 1 [Source:MGI Symbol;Acc:MGI:1333815]	GO:0001774	microglial cell activation
Cx3cr1	C-X3-C motif chemokine receptor 1 [Source:MGI Symbol;Acc:MGI:1333815]	GO:0006955	immune response
Cx3cr1	C-X3-C motif chemokine receptor 1 [Source:MGI Symbol;Acc:MGI:1333815]	GO:0002250	adaptive immune response
Cx3cr1	C-X3-C motif chemokine receptor 1 [Source:MGI Symbol;Acc:MGI:1333815]	GO:0009897	external side of plasma membrane
Cx3cr1	C-X3-C motif chemokine receptor 1 [Source:MGI Symbol;Acc:MGI:1333815]	GO:0005886	plasma membrane
Cx3cr1	C-X3-C motif chemokine receptor 1 [Source:MGI Symbol;Acc:MGI:1333815]	GO:0098609	cell-cell adhesion
Cx3cr1	C-X3-C motif chemokine receptor 1 [Source:MGI Symbol;Acc:MGI:1333815]	GO:0006954	inflammatory response
Cx3cr1	C-X3-C motif chemokine receptor 1 [Source:MGI Symbol;Acc:MGI:1333815]	GO:0045087	innate immune response
Cx3cr1	C-X3-C motif chemokine receptor 1 [Source:MGI Symbol;Acc:MGI:1333815]	GO:0009986	cell surface
Cx3cr1	C-X3-C motif chemokine receptor 1 [Source:MGI Symbol;Acc:MGI:1333815]	GO:0048471	perinuclear region of cytoplasm
Cx3cr1	C-X3-C motif chemokine receptor 1 [Source:MGI Symbol;Acc:MGI:1333815]	GO:0007613	memory
Cx3cr1	C-X3-C motif chemokine receptor 1 [Source:MGI Symbol;Acc:MGI:1333815]	GO:0007204	positive regulation of cytosolic calcium ion concentration
Cx3cr1	C-X3-C motif chemokine receptor 1 [Source:MGI Symbol;Acc:MGI:1333815]	GO:0007420	brain development
Cx3cr1	C-X3-C motif chemokine receptor 1 [Source:MGI Symbol;Acc:MGI:1333815]	GO:0002052	positive regulation of neuroblast proliferation
Cx3cr1	C-X3-C motif chemokine receptor 1 [Source:MGI Symbol;Acc:MGI:1333815]	GO:0048874	host-mediated regulation of intestinal microbiota composition
Cx3cr1	C-X3-C motif chemokine receptor 1 [Source:MGI Symbol;Acc:MGI:1333815]	GO:0061760	antifungal innate immune response
Cx3cr1	C-X3-C motif chemokine receptor 1 [Source:MGI Symbol;Acc:MGI:1333815]	GO:0032809	neuronal cell body membrane
Cx3cr1	C-X3-C motif chemokine receptor 1 [Source:MGI Symbol;Acc:MGI:1333815]	GO:0030336	negative regulation of cell migration
Cx3cr1	C-X3-C motif chemokine receptor 1 [Source:MGI Symbol;Acc:MGI:1333815]	GO:0043123	positive regulation of canonical NF-kappaB signal transduction
Cx3cr1	C-X3-C motif chemokine receptor 1 [Source:MGI Symbol;Acc:MGI:1333815]	GO:0019722	calcium-mediated signaling
Cx3cr1	C-X3-C motif chemokine receptor 1 [Source:MGI Symbol;Acc:MGI:1333815]	GO:1900272	negative regulation of long-term synaptic potentiation
Cx3cr1	C-X3-C motif chemokine receptor 1 [Source:MGI Symbol;Acc:MGI:1333815]	GO:0016493	C-C chemokine receptor activity
Cx3cr1	C-X3-C motif chemokine receptor 1 [Source:MGI Symbol;Acc:MGI:1333815]	GO:0019957	C-C chemokine binding
Cx3cr1	C-X3-C motif chemokine receptor 1 [Source:MGI Symbol;Acc:MGI:1333815]	GO:0060326	cell chemotaxis
Cx3cr1	C-X3-C motif chemokine receptor 1 [Source:MGI Symbol;Acc:MGI:1333815]	GO:2001234	negative regulation of apoptotic signaling pathway
Cx3cr1	C-X3-C motif chemokine receptor 1 [Source:MGI Symbol;Acc:MGI:1333815]	GO:0035425	autocrine signaling
Cx3cr1	C-X3-C motif chemokine receptor 1 [Source:MGI Symbol;Acc:MGI:1333815]	GO:0070098	chemokine-mediated signaling pathway
Cx3cr1	C-X3-C motif chemokine receptor 1 [Source:MGI Symbol;Acc:MGI:1333815]	GO:0002282	microglial cell activation involved in immune response
Cx3cr1	C-X3-C motif chemokine receptor 1 [Source:MGI Symbol;Acc:MGI:1333815]	GO:0071222	cellular response to lipopolysaccharide
Cx3cr1	C-X3-C motif chemokine receptor 1 [Source:MGI Symbol;Acc:MGI:1333815]	GO:0090026	positive regulation of monocyte chemotaxis
Cx3cr1	C-X3-C motif chemokine receptor 1 [Source:MGI Symbol;Acc:MGI:1333815]	GO:0110091	negative regulation of hippocampal neuron apoptotic process
Cx3cr1	C-X3-C motif chemokine receptor 1 [Source:MGI Symbol;Acc:MGI:1333815]	GO:0030595	leukocyte chemotaxis
Cx3cr1	C-X3-C motif chemokine receptor 1 [Source:MGI Symbol;Acc:MGI:1333815]	GO:0004950	chemokine receptor activity
Cx3cr1	C-X3-C motif chemokine receptor 1 [Source:MGI Symbol;Acc:MGI:1333815]	GO:0032691	negative regulation of interleukin-1 beta production
Cx3cr1	C-X3-C motif chemokine receptor 1 [Source:MGI Symbol;Acc:MGI:1333815]	GO:0050804	modulation of chemical synaptic transmission
Cx3cr1	C-X3-C motif chemokine receptor 1 [Source:MGI Symbol;Acc:MGI:1333815]	GO:0045428	regulation of nitric oxide biosynthetic process
Cx3cr1	C-X3-C motif chemokine receptor 1 [Source:MGI Symbol;Acc:MGI:1333815]	GO:0004896	cytokine receptor activity
Cx3cr1	C-X3-C motif chemokine receptor 1 [Source:MGI Symbol;Acc:MGI:1333815]	GO:0035176	social behavior
Cx3cr1	C-X3-C motif chemokine receptor 1 [Source:MGI Symbol;Acc:MGI:1333815]	GO:1904141	positive regulation of microglial cell migration
Cx3cr1	C-X3-C motif chemokine receptor 1 [Source:MGI Symbol;Acc:MGI:1333815]	GO:0050901	leukocyte tethering or rolling
Cx3cr1	C-X3-C motif chemokine receptor 1 [Source:MGI Symbol;Acc:MGI:1333815]	GO:0019960	C-X3-C chemokine binding
Cx3cr1	C-X3-C motif chemokine receptor 1 [Source:MGI Symbol;Acc:MGI:1333815]	GO:0002881	negative regulation of chronic inflammatory response to non-antigenic stimulus
Cx3cr1	C-X3-C motif chemokine receptor 1 [Source:MGI Symbol;Acc:MGI:1333815]	GO:0007200	phospholipase C-activating G protein-coupled receptor signaling pathway
Cx3cr1	C-X3-C motif chemokine receptor 1 [Source:MGI Symbol;Acc:MGI:1333815]	GO:0021626	central nervous system maturation
Cx3cr1	C-X3-C motif chemokine receptor 1 [Source:MGI Symbol;Acc:MGI:1333815]	GO:0032680	regulation of tumor necrosis factor production
Cx3cr1	C-X3-C motif chemokine receptor 1 [Source:MGI Symbol;Acc:MGI:1333815]	GO:0050769	positive regulation of neurogenesis
Cx3cr1	C-X3-C motif chemokine receptor 1 [Source:MGI Symbol;Acc:MGI:1333815]	GO:0060074	synapse maturation
Cx3cr1	C-X3-C motif chemokine receptor 1 [Source:MGI Symbol;Acc:MGI:1333815]	GO:0098883	synapse pruning
Cx3cr1	C-X3-C motif chemokine receptor 1 [Source:MGI Symbol;Acc:MGI:1333815]	GO:0150090	multiple spine synapse organization, single dendrite
Cx3cr1	C-X3-C motif chemokine receptor 1 [Source:MGI Symbol;Acc:MGI:1333815]	GO:1903721	positive regulation of I-kappaB phosphorylation
Cx3cr1	C-X3-C motif chemokine receptor 1 [Source:MGI Symbol;Acc:MGI:1333815]	GO:1904150	negative regulation of microglial cell mediated cytotoxicity
Cx3cr1	C-X3-C motif chemokine receptor 1 [Source:MGI Symbol;Acc:MGI:1333815]	GO:0097447	dendritic tree
Cx3cr1	C-X3-C motif chemokine receptor 1 [Source:MGI Symbol;Acc:MGI:1333815]	GO:0031737	CX3C chemokine receptor binding
Cx3cr1	C-X3-C motif chemokine receptor 1 [Source:MGI Symbol;Acc:MGI:1333815]	GO:0071560	cellular response to transforming growth factor beta stimulus
Nptx2, Tek, Artn, Bche, Grm3, mt-Nd2
Pm20d1	peptidase M20 domain containing 1 [Source:MGI Symbol;Acc:MGI:2442939]	GO:0016787	hydrolase activity
Pm20d1	peptidase M20 domain containing 1 [Source:MGI Symbol;Acc:MGI:2442939]	GO:0006629	lipid metabolic process
Pm20d1	peptidase M20 domain containing 1 [Source:MGI Symbol;Acc:MGI:2442939]	GO:0046872	metal ion binding
Pm20d1	peptidase M20 domain containing 1 [Source:MGI Symbol;Acc:MGI:2442939]	GO:0008233	peptidase activity
Pm20d1	peptidase M20 domain containing 1 [Source:MGI Symbol;Acc:MGI:2442939]	GO:0006508	proteolysis
Pm20d1	peptidase M20 domain containing 1 [Source:MGI Symbol;Acc:MGI:2442939]	GO:0005576	extracellular region
Pm20d1	peptidase M20 domain containing 1 [Source:MGI Symbol;Acc:MGI:2442939]	GO:0005615	extracellular space
Pm20d1	peptidase M20 domain containing 1 [Source:MGI Symbol;Acc:MGI:2442939]	GO:0004046	aminoacylase activity
Pm20d1	peptidase M20 domain containing 1 [Source:MGI Symbol;Acc:MGI:2442939]	GO:0044255	cellular lipid metabolic process
Pm20d1	peptidase M20 domain containing 1 [Source:MGI Symbol;Acc:MGI:2442939]	GO:0016829	lyase activity
Pm20d1	peptidase M20 domain containing 1 [Source:MGI Symbol;Acc:MGI:2442939]	GO:0006631	fatty acid metabolic process
Pm20d1	peptidase M20 domain containing 1 [Source:MGI Symbol;Acc:MGI:2442939]	GO:0016811	hydrolase activity, acting on carbon-nitrogen (but not peptide) bonds, in linear amides
Pm20d1	peptidase M20 domain containing 1 [Source:MGI Symbol;Acc:MGI:2442939]	GO:0006520	amino acid metabolic process
Pm20d1	peptidase M20 domain containing 1 [Source:MGI Symbol;Acc:MGI:2442939]	GO:0097009	energy homeostasis
Pm20d1	peptidase M20 domain containing 1 [Source:MGI Symbol;Acc:MGI:2442939]	GO:1990845	adaptive thermogenesis
Pm20d1	peptidase M20 domain containing 1 [Source:MGI Symbol;Acc:MGI:2442939]	GO:0022904	respiratory electron transport chain
Pm20d1	peptidase M20 domain containing 1 [Source:MGI Symbol;Acc:MGI:2442939]	GO:0043604	amide biosynthetic process
Pm20d1	peptidase M20 domain containing 1 [Source:MGI Symbol;Acc:MGI:2442939]	GO:0043605	amide catabolic process
Pm20d1	peptidase M20 domain containing 1 [Source:MGI Symbol;Acc:MGI:2442939]
Pomc	pro-opiomelanocortin-alpha [Source:MGI Symbol;Acc:MGI:97742]	GO:0005576	extracellular region
Pomc	pro-opiomelanocortin-alpha [Source:MGI Symbol;Acc:MGI:97742]	GO:0005179	hormone activity
Pomc	pro-opiomelanocortin-alpha [Source:MGI Symbol;Acc:MGI:97742]	GO:0005515	protein binding
Pomc	pro-opiomelanocortin-alpha [Source:MGI Symbol;Acc:MGI:97742]	GO:0008217	regulation of blood pressure
Pomc	pro-opiomelanocortin-alpha [Source:MGI Symbol;Acc:MGI:97742]	GO:0005737	cytoplasm
Pomc	pro-opiomelanocortin-alpha [Source:MGI Symbol;Acc:MGI:97742]	GO:0045944	positive regulation of transcription by RNA polymerase II
Pomc	pro-opiomelanocortin-alpha [Source:MGI Symbol;Acc:MGI:97742]	GO:0005615	extracellular space
Pomc	pro-opiomelanocortin-alpha [Source:MGI Symbol;Acc:MGI:97742]	GO:0007165	signal transduction
Pomc	pro-opiomelanocortin-alpha [Source:MGI Symbol;Acc:MGI:97742]	GO:0001664	G protein-coupled receptor binding
Pomc	pro-opiomelanocortin-alpha [Source:MGI Symbol;Acc:MGI:97742]	GO:0030141	secretory granule
Pomc	pro-opiomelanocortin-alpha [Source:MGI Symbol;Acc:MGI:97742]	GO:0042593	glucose homeostasis
Pomc	pro-opiomelanocortin-alpha [Source:MGI Symbol;Acc:MGI:97742]	GO:0007267	cell-cell signaling
Pomc	pro-opiomelanocortin-alpha [Source:MGI Symbol;Acc:MGI:97742]	GO:0007218	neuropeptide signaling pathway
Pomc	pro-opiomelanocortin-alpha [Source:MGI Symbol;Acc:MGI:97742]	GO:0006091	generation of precursor metabolites and energy
Pomc	pro-opiomelanocortin-alpha [Source:MGI Symbol;Acc:MGI:97742]	GO:0032720	negative regulation of tumor necrosis factor production
Pomc	pro-opiomelanocortin-alpha [Source:MGI Symbol;Acc:MGI:97742]	GO:0070873	regulation of glycogen metabolic process
Pomc	pro-opiomelanocortin-alpha [Source:MGI Symbol;Acc:MGI:97742]	GO:0019722	calcium-mediated signaling
Pomc	pro-opiomelanocortin-alpha [Source:MGI Symbol;Acc:MGI:97742]	GO:2000852	regulation of corticosterone secretion
Pomc	pro-opiomelanocortin-alpha [Source:MGI Symbol;Acc:MGI:97742]	GO:0005102	signaling receptor binding
Pomc	pro-opiomelanocortin-alpha [Source:MGI Symbol;Acc:MGI:97742]	GO:0031781	type 3 melanocortin receptor binding
Pomc	pro-opiomelanocortin-alpha [Source:MGI Symbol;Acc:MGI:97742]	GO:0031782	type 4 melanocortin receptor binding
Pomc	pro-opiomelanocortin-alpha [Source:MGI Symbol;Acc:MGI:97742]	GO:0070996	type 1 melanocortin receptor binding
Pomc	pro-opiomelanocortin-alpha [Source:MGI Symbol;Acc:MGI:97742]	GO:0032098	regulation of appetite
Pomc	pro-opiomelanocortin-alpha [Source:MGI Symbol;Acc:MGI:97742]	GO:0033059	cellular pigmentation
Pomc	pro-opiomelanocortin-alpha [Source:MGI Symbol;Acc:MGI:97742]	GO:0106071	positive regulation of adenylate cyclase-activating G protein-coupled receptor signaling pathway
Pomc	pro-opiomelanocortin-alpha [Source:MGI Symbol;Acc:MGI:97742]	GO:0140668	positive regulation of oxytocin production
Pomc	pro-opiomelanocortin-alpha [Source:MGI Symbol;Acc:MGI:97742]	GO:1990680	response to melanocyte-stimulating hormone
Pomc	pro-opiomelanocortin-alpha [Source:MGI Symbol;Acc:MGI:97742]
