# Supplementary material for: Unraveling the brain expression of BDNF in a mouse model of Anorexia Nervosa
Source: Research Square preprint supplement (doi:10.21203/rs.3.rs-6260210/v1), 2025-04-16
Supplement: Supplementary file 1 [file 634bdabddd92850e358992df.pdf]

Supplementary Table 2. Functional Annotation of Differentially Expressed Genes in the dorsal striatum from Table 1

| ernal_gene_ni | description                                                                          | go_id      | name_1006                                                                                                                                                     |
|---------------|--------------------------------------------------------------------------------------|------------|---------------------------------------------------------------------------------------------------------------------------------------------------------------|
| H1f2          | H1.2 linker histone, cluster member [Source:MGI Symbol;Acc:MGI:1931526]              | GO:0003677 | DNA binding                                                                                                                                                   |
| H1f2          | H1.2 linker histone, cluster member [Source:MGI Symbol;Acc:MGI:1931526]              | GO:0030527 | structural constituent of chromatin                                                                                                                           |
| H1f2          | H1.2 linker histone, cluster member [Source:MGI Symbol;Acc:MGI:1931526]              | GO:0000786 | nucleosome                                                                                                                                                    |
| H1f2          | H1.2 linker histone, cluster member [Source:MGI Symbol;Acc:MGI:1931526]              | GO:0006334 | nucleosome assembly                                                                                                                                           |
| H1f2          | H1.2 linker histone, cluster member [Source:MGI Symbol;Acc:MGI:1931526]              | GO:0005515 | protein binding                                                                                                                                               |
| H1f2          | H1.2 linker histone, cluster member [Source:MGI Symbol;Acc:MGI:1931526]              | GO:0000122 | negative regulation of transcription by RNA polymerase II                                                                                                     |
| H1f2          | H1.2 linker histone, cluster member [Source:MGI Symbol;Acc:MGI:1931526]              | GO:0006357 | regulation of transcription by RNA polymerase II                                                                                                              |
| H1f2          | H1.2 linker histone, cluster member [Source:MGI Symbol;Acc:MGI:1931526]              | GO:0006325 | chromatin organization                                                                                                                                        |
| H1f2          | H1.2 linker histone, cluster member [Source:MGI Symbol;Acc:MGI:1931526]              | GO:0005634 | nucleus                                                                                                                                                       |
| H1f2          | H1.2 linker histone, cluster member [Source:MGI Symbol;Acc:MGI:1931526]              | GO:0031492 | nucleosomal DNA binding                                                                                                                                       |
| H1f2          | H1.2 linker histone, cluster member [Source:MGI Symbol;Acc:MGI:1931526]              | GO:0005694 | chromosome                                                                                                                                                    |
| H1f2          | H1.2 linker histone, cluster member [Source:MGI Symbol;Acc:MGI:1931526]              | GO:0003690 | double-stranded DNA binding                                                                                                                                   |
| H1f2          | H1.2 linker histone, cluster member [Source:MGI Symbol;Acc:MGI:1931526]              | GO:0030261 | chromosome condensation                                                                                                                                       |
| H1f2          | H1.2 linker histone, cluster member [Source:MGI Symbol;Acc:MGI:1931526]              | GO:0045910 | negative regulation of DNA recombination                                                                                                                      |
| H1f2          | H1.2 linker histone, cluster member [Source:MGI Symbol;Acc:MGI:1931526]              | GO:0000791 | euchromatin                                                                                                                                                   |
| H1f2          | H1.2 linker histone, cluster member [Source:MGI Symbol;Acc:MGI:1931526]              | GO:0031490 | chromatin DNA binding                                                                                                                                         |
| Gap43         | growth associated protein 43 [Source:MGI Symbol;Acc:MGI:95639]                       | GO:0005515 | protein binding                                                                                                                                               |
| Gap43         | growth associated protein 43 [Source:MGI Symbol;Acc:MGI:95639]                       | GO:0040008 | regulation of growth                                                                                                                                          |
| Gap43         | growth associated protein 43 [Source:MGI Symbol;Acc:MGI:95639]                       | GO:0014069 | postsynaptic density                                                                                                                                          |
| Gap43         | growth associated protein 43 [Source:MGI Symbol;Acc:MGI:95639]                       | GO:0005737 | cytoplasm                                                                                                                                                     |
| Gap43         | growth associated protein 43 [Source:MGI Symbol;Acc:MGI:95639]                       | GO:0030424 | axon                                                                                                                                                          |
| Gap43         | growth associated protein 43 [Source:MGI Symbol;Acc:MGI:95639]                       | GO:0060019 | radial glial cell differentiation                                                                                                                             |
| Gap43         | growth associated protein 43 [Source:MGI Symbol;Acc:MGI:95639]                       | GO:0042995 | cell projection                                                                                                                                               |
| Gap43         | growth associated protein 43 [Source:MGI Symbol;Acc:MGI:95639]                       | GO:0005886 | plasma membrane                                                                                                                                               |
| Gap43         | growth associated protein 43 [Source:MGI Symbol;Acc:MGI:95639]                       | GO:0071944 | cell periphery                                                                                                                                                |
| Gap43         | growth associated protein 43 [Source:MGI Symbol;Acc:MGI:95639]                       | GO:0007399 | nervous system development                                                                                                                                    |
| Gap43         | growth associated protein 43 [Source:MGI Symbol;Acc:MGI:95639]                       | GO:0030154 | cell differentiation                                                                                                                                          |
| Gap43         | growth associated protein 43 [Source:MGI Symbol;Acc:MGI:95639]                       | GO:0045202 | synapse                                                                                                                                                       |
| Gap43         | growth associated protein 43 [Source:MGI Symbol;Acc:MGI:95639]                       | GO:0030425 | dendrite                                                                                                                                                      |
| Gap43         | growth associated protein 43 [Source:MGI Symbol;Acc:MGI:95639]                       | GO:0043204 | perikaryon                                                                                                                                                    |
| Gap43         | growth associated protein 43 [Source:MGI Symbol;Acc:MGI:95639]                       | GO:0005516 | calmodulin binding                                                                                                                                            |
| Gap43         | growth associated protein 43 [Source:MGI Symbol;Acc:MGI:95639]                       | GO:0001786 | phosphatidyserine binding                                                                                                                                     |
| Gap43         | growth associated protein 43 [Source:MGI Symbol;Acc:MGI:95639]                       | GO:0031527 | filopodium membrane                                                                                                                                           |
| Gap43         | growth associated protein 43 [Source:MGI Symbol;Acc:MGI:95639]                       | GO:0048708 | astrocyte differentiation                                                                                                                                     |
| Gap43         | growth associated protein 43 [Source:MGI Symbol;Acc:MGI:95639]                       | GO:0098793 | presynapse                                                                                                                                                    |
| Gap43         | growth associated protein 43 [Source:MGI Symbol;Acc:MGI:95639]                       | GO:0098982 | GABA-ergic synapse                                                                                                                                            |
| Gap43         | growth associated protein 43 [Source:MGI Symbol;Acc:MGI:95639]                       | GO:0045165 | cell fate commitment                                                                                                                                          |
| Gap43         | growth associated protein 43 [Source:MGI Symbol;Acc:MGI:95639]                       | GO:0007411 | axon guidance                                                                                                                                                 |
| Gap43         | growth associated protein 43 [Source:MGI Symbol;Acc:MGI:95639]                       | GO:0016198 | axon choice point recognition                                                                                                                                 |
| Gap43         | growth associated protein 43 [Source:MGI Symbol;Acc:MGI:95639]                       | GO:0035727 | lysophosphatidic acid binding                                                                                                                                 |
| Gap43         | growth associated protein 43 [Source:MGI Symbol;Acc:MGI:95639]                       | GO:1901981 | phosphatidylinositol phosphate binding                                                                                                                        |
| Gap43         | growth associated protein 43 [Source:MGI Symbol;Acc:MGI:95639]                       | GO:0010996 | response to auditory stimulus                                                                                                                                 |
| Gap43         | growth associated protein 43 [Source:MGI Symbol;Acc:MGI:95639]                       | GO:0031103 | axon regeneration                                                                                                                                             |
| Gap43         | growth associated protein 43 [Source:MGI Symbol;Acc:MGI:95639]                       | GO:0042246 | tissue regeneration                                                                                                                                           |
| Gap43         | growth associated protein 43 [Source:MGI Symbol;Acc:MGI:95639]                       | GO:0051489 | regulation of filopodium assembly                                                                                                                             |
| Gap43         | growth associated protein 43 [Source:MGI Symbol;Acc:MGI:95639]                       | GO:0099150 | regulation of postsynaptic specialization assembly                                                                                                            |
| Gap43         | growth associated protein 43 [Source:MGI Symbol;Acc:MGI:95639]                       | GO:0032584 | growth cone membrane                                                                                                                                          |
| Fads1         | fatty acid desaturase 1 [Source:MGI Symbol;Acc:MGI:1923517]                          | GO:0016491 | oxidoreductase activity                                                                                                                                       |
| Fads1         | fatty acid desaturase 1 [Source:MGI Symbol;Acc:MGI:1923517]                          | GO:0006629 | lipid metabolic process                                                                                                                                       |
| Fads1         | fatty acid desaturase 1 [Source:MGI Symbol;Acc:MGI:1923517]                          | GO:0016020 | membrane                                                                                                                                                      |
| Fads1         | fatty acid desaturase 1 [Source:MGI Symbol;Acc:MGI:1923517]                          | GO:0005783 | endoplasmic reticulum                                                                                                                                         |
| Fads1         | fatty acid desaturase 1 [Source:MGI Symbol;Acc:MGI:1923517]                          | GO:0005789 | endoplasmic reticulum membrane                                                                                                                                |
| Fads1         | fatty acid desaturase 1 [Source:MGI Symbol;Acc:MGI:1923517]                          | GO:0005739 | mitochondrion                                                                                                                                                 |
| Fads1         | fatty acid desaturase 1 [Source:MGI Symbol;Acc:MGI:1923517]                          | GO:0006633 | fatty acid biosynthetic process                                                                                                                               |
| Fads1         | fatty acid desaturase 1 [Source:MGI Symbol;Acc:MGI:1923517]                          | GO:0006636 | unsaturated fatty acid biosynthetic process                                                                                                                   |
| Fads1         | fatty acid desaturase 1 [Source:MGI Symbol;Acc:MGI:1923517]                          | GO:0016717 | oxidoreductase activity, acting on paired donors, with oxidation of a pair of donors resulting in the reduction of molecular oxygen to two molecules of water |
| Fads1         | fatty acid desaturase 1 [Source:MGI Symbol;Acc:MGI:1923517]                          | GO:0019369 | arachidonic acid metabolic process                                                                                                                            |
| Fads1         | fatty acid desaturase 1 [Source:MGI Symbol;Acc:MGI:1923517]                          | GO:0042759 | long-chain fatty acid biosynthetic process                                                                                                                    |
| Fads1         | fatty acid desaturase 1 [Source:MGI Symbol;Acc:MGI:1923517]                          | GO:0016213 | linoleoyl-CoA desaturase activity                                                                                                                             |
| Fads1         | fatty acid desaturase 1 [Source:MGI Symbol;Acc:MGI:1923517]                          | GO:0062076 | acyl-CoA delta5-desaturase activity                                                                                                                           |
| Fads1         | fatty acid desaturase 1 [Source:MGI Symbol;Acc:MGI:1923517]                          | GO:0016705 | oxidoreductase activity, acting on paired donors, with incorporation or reduction of molecular oxygen                                                         |
| Rgs11         | regulator of G-protein signaling 11 [Source:MGI Symbol;Acc:MGI:1354739]              |            |                                                                                                                                                               |
| Rgs11         | regulator of G-protein signaling 11 [Source:MGI Symbol;Acc:MGI:1354739]              | GO:0007186 | G protein-coupled receptor signaling pathway                                                                                                                  |
| Rgs11         | regulator of G-protein signaling 11 [Source:MGI Symbol;Acc:MGI:1354739]              | GO:0035556 | intracellular signal transduction                                                                                                                             |
| Rgs11         | regulator of G-protein signaling 11 [Source:MGI Symbol;Acc:MGI:1354739]              | GO:0008277 | regulation of G protein-coupled receptor signaling pathway                                                                                                    |
| Rgs11         | regulator of G-protein signaling 11 [Source:MGI Symbol;Acc:MGI:1354739]              | GO:0009968 | negative regulation of signal transduction                                                                                                                    |
| Rgs11         | regulator of G-protein signaling 11 [Source:MGI Symbol;Acc:MGI:1354739]              | GO:0031681 | G-protein beta-subunit binding                                                                                                                                |
| Rgs11         | regulator of G-protein signaling 11 [Source:MGI Symbol;Acc:MGI:1354739]              | GO:0032991 | protein-containing complex                                                                                                                                    |
| Trem2         | triggering receptor expressed on myeloid cells 2 [Source:MGI Symbol;Acc:MGI:1913150] | GO:0071456 | cellular response to hypoxia                                                                                                                                  |
| Trem2         | triggering receptor expressed on myeloid cells 2 [Source:MGI Symbol;Acc:MGI:1913150] | GO:0005515 | protein binding                                                                                                                                               |
| Trem2         | triggering receptor expressed on myeloid cells 2 [Source:MGI Symbol;Acc:MGI:1913150] | GO:0071333 | cellular response to glucose stimulus                                                                                                                         |
| Trem2         | triggering receptor expressed on myeloid cells 2 [Source:MGI Symbol;Acc:MGI:1913150] | GO:0005886 | plasma membrane                                                                                                                                               |
| Trem2         | triggering receptor expressed on myeloid cells 2 [Source:MGI Symbol;Acc:MGI:1913150] | GO:0042742 | defense response to bacterium                                                                                                                                 |
| Trem2         | triggering receptor expressed on myeloid cells 2 [Source:MGI Symbol;Acc:MGI:1913150] | GO:0005576 | extracellular region                                                                                                                                          |
| Trem2         | triggering receptor expressed on myeloid cells 2 [Source:MGI Symbol;Acc:MGI:1913150] | GO:0010468 | regulation of gene expression                                                                                                                                 |
| Trem2         | triggering receptor expressed on myeloid cells 2 [Source:MGI Symbol;Acc:MGI:1913150] | GO:0008289 | lipid binding                                                                                                                                                 |
| Trem2         | triggering receptor expressed on myeloid cells 2 [Source:MGI Symbol;Acc:MGI:1913150] | GO:0045088 | regulation of innate immune response                                                                                                                          |
| Trem2         | triggering receptor expressed on myeloid cells 2 [Source:MGI Symbol;Acc:MGI:1913150] | GO:0030316 | osteoclast differentiation                                                                                                                                    |
| Trem2         | triggering receptor expressed on myeloid cells 2 [Source:MGI Symbol;Acc:MGI:1913150] | GO:0071526 | semaphorin-plexin signaling pathway                                                                                                                           |
| Trem2         | triggering receptor expressed on myeloid cells 2 [Source:MGI Symbol;Acc:MGI:1913150] | GO:0070374 | positive regulation of ERK1 and ERK2 cascade                                                                                                                  |
| Trem2         | triggering receptor expressed on myeloid cells 2 [Source:MGI Symbol;Acc:MGI:1913150] | GO:0043066 | negative regulation of apoptotic process                                                                                                                      |
| Trem2         | triggering receptor expressed on myeloid cells 2 [Source:MGI Symbol;Acc:MGI:1913150] | GO:0017154 | semaphorin receptor activity                                                                                                                                  |
| Trem2         | triggering receptor expressed on myeloid cells 2 [Source:MGI Symbol;Acc:MGI:1913150] | GO:0010628 | positive regulation of gene expression                                                                                                                        |
| Trem2         | triggering receptor expressed on myeloid cells 2 [Source:MGI Symbol;Acc:MGI:1913150] | GO:0045672 | positive regulation of osteoclast differentiation                                                                                                             |
| Trem2         | triggering receptor expressed on myeloid cells 2 [Source:MGI Symbol;Acc:MGI:1913150] | GO:0002931 | response to ischemia                                                                                                                                          |
| Trem2         | triggering receptor expressed on myeloid cells 2 [Source:MGI Symbol;Acc:MGI:1913150] | GO:0032733 | positive regulation of interleukin-10 production                                                                                                              |
| Trem2         | triggering receptor expressed on myeloid cells 2 [Source:MGI Symbol;Acc:MGI:1913150] | GO:0032720 | negative regulation of tumor necrosis factor production                                                                                                       |
| Trem2         | triggering receptor expressed on myeloid cells 2 [Source:MGI Symbol;Acc:MGI:1913150] | GO:0051898 | negative regulation of phosphatidylinositol 3-kinase/protein kinase B signal transduction                                                                     |
| Trem2         | triggering receptor expressed on myeloid cells 2 [Source:MGI Symbol;Acc:MGI:1913150] | GO:0001786 | phosphatidyserine binding                                                                                                                                     |
| Trem2         | triggering receptor expressed on myeloid cells 2 [Source:MGI Symbol;Acc:MGI:1913150] | GO:1901224 | positive regulation of non-canonical NF-kappaB signal transduction                                                                                            |
| Trem2         | triggering receptor expressed on myeloid cells 2 [Source:MGI Symbol;Acc:MGI:1913150] | GO:1904646 | cellular response to amyloid-beta                                                                                                                             |
| Trem2         | triggering receptor expressed on myeloid cells 2 [Source:MGI Symbol;Acc:MGI:1913150] | GO:0002282 | microglial cell activation involved in immune response                                                                                                        |
| Trem2         | triggering receptor expressed on myeloid cells 2 [Source:MGI Symbol;Acc:MGI:1913150] | GO:0002291 | T cell activation via T cell receptor contact with antigen bound to MHC molecule on antigen presenting cell                                                   |
| Trem2         | triggering receptor expressed on myeloid cells 2 [Source:MGI Symbol;Acc:MGI:1913150] | GO:0034241 | positive regulation of macrophage fusion                                                                                                                      |
| Trem2         | triggering receptor expressed on myeloid cells 2 [Source:MGI Symbol;Acc:MGI:1913150] | GO:0043277 | apoptotic cell clearance                                                                                                                                      |
| Trem2         | triggering receptor expressed on myeloid cells 2 [Source:MGI Symbol;Acc:MGI:1913150] | GO:0048678 | response to axon injury                                                                                                                                       |
| Trem2         | triggering receptor expressed on myeloid cells 2 [Source:MGI Symbol;Acc:MGI:1913150] | GO:1903980 | positive regulation of microglial cell activation                                                                                                             |
| Trem2         | triggering receptor expressed on myeloid cells 2 [Source:MGI Symbol;Acc:MGI:1913150] | GO:0001774 | microglial cell activation                                                                                                                                    |
| Trem2         | triggering receptor expressed on myeloid cells 2 [Source:MGI Symbol;Acc:MGI:1913150] | GO:0006911 | phagocytosis, engulfment                                                                                                                                      |
| Trem2         | triggering receptor expressed on myeloid cells 2 [Source:MGI Symbol;Acc:MGI:1913150] | GO:0150076 | neuroinflammatory response                                                                                                                                    |
| Trem2         | triggering receptor expressed on myeloid cells 2 [Source:MGI Symbol;Acc:MGI:1913150] | GO:0005543 | phospholipid binding                                                                                                                                          |
| Trem2         | triggering receptor expressed on myeloid cells 2 [Source:MGI Symbol;Acc:MGI:1913150] | GO:0060100 | positive regulation of phagocytosis, engulfment                                                                                                               |
| Trem2         | triggering receptor expressed on myeloid cells 2 [Source:MGI Symbol;Acc:MGI:1913150] | GO:0048143 | astrocyte activation                                                                                                                                          |
| Trem2         | triggering receptor expressed on myeloid cells 2 [Source:MGI Symbol;Acc:MGI:1913150] | GO:0050766 | positive regulation of phagocytosis                                                                                                                           |
| Trem2         | triggering receptor expressed on myeloid cells 2 [Source:MGI Symbol;Acc:MGI:1913150] | GO:0038023 | signaling receptor activity                                                                                                                                   |
| Trem2         | triggering receptor expressed on myeloid cells 2 [Source:MGI Symbol;Acc:MGI:1913150] | GO:0050730 | regulation of peptidyl-tyrosine phosphorylation                                                                                                               |
| Trem2         | triggering receptor expressed on myeloid cells 2 [Source:MGI Symbol;Acc:MGI:1913150] | GO:1900223 | positive regulation of amyloid-beta clearance                                                                                                                 |
| Trem2         | triggering receptor expressed on myeloid cells 2 [Source:MGI Symbol;Acc:MGI:1913150] | GO:2001171 | positive regulation of ATP biosynthetic process                                                                                                               |
| Trem2         | triggering receptor expressed on myeloid cells 2 [Source:MGI Symbol;Acc:MGI:1913150] | GO:0010875 | positive regulation of cholesterol efflux                                                                                                                     |
| Trem2         | triggering receptor expressed on myeloid cells 2 [Source:MGI Symbol;Acc:MGI:1913150] | GO:0004888 | transmembrane signaling receptor activity                                                                                                                     |
| Trem2         | triggering receptor expressed on myeloid cells 2 [Source:MGI Symbol;Acc:MGI:1913150] | GO:0001530 | lipopolysaccharide binding                                                                                                                                    |
| Trem2         | triggering receptor expressed on myeloid cells 2 [Source:MGI Symbol;Acc:MGI:1913150] | GO:0150079 | negative regulation of neuroinflammatory response                                                                                                             |
| Trem2         | triggering receptor expressed on myeloid cells 2 [Source:MGI Symbol;Acc:MGI:1913150] | GO:0050829 | defense response to Gram-negative bacterium                                                                                                                   |
| Trem2         | triggering receptor expressed on myeloid cells 2 [Source:MGI Symbol;Acc:MGI:1913150] | GO:0061889 | negative regulation of astrocyte activation                                                                                                                   |

|          |                                                                                       |            |                                                                                                |
|----------|---------------------------------------------------------------------------------------|------------|------------------------------------------------------------------------------------------------|
| Trem2    | triggering receptor expressed on myeloid cells 2 [Source:MGI Symbol;Acc:MGI:1913150]  | GO:0150094 | amyloid-beta clearance by cellular catabolic process                                           |
| Trem2    | triggering receptor expressed on myeloid cells 2 [Source:MGI Symbol;Acc:MGI:1913150]  | GO:1905907 | negative regulation of amyloid fibril formation                                                |
| Trem2    | triggering receptor expressed on myeloid cells 2 [Source:MGI Symbol;Acc:MGI:1913150]  | GO:0045087 | innate immune response                                                                         |
| Trem2    | triggering receptor expressed on myeloid cells 2 [Source:MGI Symbol;Acc:MGI:1913150]  | GO:0001934 | positive regulation of protein phosphorylation                                                 |
| Trem2    | triggering receptor expressed on myeloid cells 2 [Source:MGI Symbol;Acc:MGI:1913150]  | GO:0030215 | semaphorin receptor binding                                                                    |
| Trem2    | triggering receptor expressed on myeloid cells 2 [Source:MGI Symbol;Acc:MGI:1913150]  | GO:0120035 | regulation of plasma membrane bounded cell projection organization                             |
| Trem2    | triggering receptor expressed on myeloid cells 2 [Source:MGI Symbol;Acc:MGI:1913150]  | GO:1900016 | negative regulation of cytokine production involved in inflammatory response                   |
| Trem2    | triggering receptor expressed on myeloid cells 2 [Source:MGI Symbol;Acc:MGI:1913150]  | GO:0032691 | negative regulation of interleukin-1 beta production                                           |
| Trem2    | triggering receptor expressed on myeloid cells 2 [Source:MGI Symbol;Acc:MGI:1913150]  | GO:0061518 | microglial cell proliferation                                                                  |
| Trem2    | triggering receptor expressed on myeloid cells 2 [Source:MGI Symbol;Acc:MGI:1913150]  | GO:1901800 | positive regulation of proteasomal protein catabolic process                                   |
| Trem2    | triggering receptor expressed on myeloid cells 2 [Source:MGI Symbol;Acc:MGI:1913150]  | GO:1990782 | protein tyrosine kinase binding                                                                |
| Trem2    | triggering receptor expressed on myeloid cells 2 [Source:MGI Symbol;Acc:MGI:1913150]  | GO:1900226 | negative regulation of NLRP3 inflammasome complex assembly                                     |
| Trem2    | triggering receptor expressed on myeloid cells 2 [Source:MGI Symbol;Acc:MGI:1913150]  | GO:0070269 | pyroptosis                                                                                     |
| Trem2    | triggering receptor expressed on myeloid cells 2 [Source:MGI Symbol;Acc:MGI:1913150]  | GO:0038160 | CXCL12-activated CXCR4 signaling pathway                                                       |
| Trem2    | triggering receptor expressed on myeloid cells 2 [Source:MGI Symbol;Acc:MGI:1913150]  | GO:0035176 | social behavior                                                                                |
| Trem2    | triggering receptor expressed on myeloid cells 2 [Source:MGI Symbol;Acc:MGI:1913150]  | GO:0019209 | kinase activator activity                                                                      |
| Trem2    | triggering receptor expressed on myeloid cells 2 [Source:MGI Symbol;Acc:MGI:1913150]  | GO:0042834 | peptidoglycan binding                                                                          |
| Trem2    | triggering receptor expressed on myeloid cells 2 [Source:MGI Symbol;Acc:MGI:1913150]  | GO:0070891 | lipoteichoic acid binding                                                                      |
| Trem2    | triggering receptor expressed on myeloid cells 2 [Source:MGI Symbol;Acc:MGI:1913150]  | GO:0120146 | sulfatide binding                                                                              |
| Trem2    | triggering receptor expressed on myeloid cells 2 [Source:MGI Symbol;Acc:MGI:1913150]  | GO:0002862 | negative regulation of inflammatory response to antigenic stimulus                             |
| Trem2    | triggering receptor expressed on myeloid cells 2 [Source:MGI Symbol;Acc:MGI:1913150]  | GO:0010507 | negative regulation of autophagy                                                               |
| Trem2    | triggering receptor expressed on myeloid cells 2 [Source:MGI Symbol;Acc:MGI:1913150]  | GO:0010887 | negative regulation of cholesterol storage                                                     |
| Trem2    | triggering receptor expressed on myeloid cells 2 [Source:MGI Symbol;Acc:MGI:1913150]  | GO:0010891 | negative regulation of sequestering of triglyceride                                            |
| Trem2    | triggering receptor expressed on myeloid cells 2 [Source:MGI Symbol;Acc:MGI:1913150]  | GO:0010983 | positive regulation of high-density lipoprotein particle clearance                             |
| Trem2    | triggering receptor expressed on myeloid cells 2 [Source:MGI Symbol;Acc:MGI:1913150]  | GO:0031663 | lipopolysaccharide-mediated signaling pathway                                                  |
| Trem2    | triggering receptor expressed on myeloid cells 2 [Source:MGI Symbol;Acc:MGI:1913150]  | GO:0032006 | regulation of TOR signaling                                                                    |
| Trem2    | triggering receptor expressed on myeloid cells 2 [Source:MGI Symbol;Acc:MGI:1913150]  | GO:0032008 | positive regulation of TOR signaling                                                           |
| Trem2    | triggering receptor expressed on myeloid cells 2 [Source:MGI Symbol;Acc:MGI:1913150]  | GO:0032497 | detection of lipopolysaccharide                                                                |
| Trem2    | triggering receptor expressed on myeloid cells 2 [Source:MGI Symbol;Acc:MGI:1913150]  | GO:0032499 | detection of peptidoglycan                                                                     |
| Trem2    | triggering receptor expressed on myeloid cells 2 [Source:MGI Symbol;Acc:MGI:1913150]  | GO:0032675 | regulation of interleukin-6 production                                                         |
| Trem2    | triggering receptor expressed on myeloid cells 2 [Source:MGI Symbol;Acc:MGI:1913150]  | GO:0034136 | negative regulation of toll-like receptor 2 signaling pathway                                  |
| Trem2    | triggering receptor expressed on myeloid cells 2 [Source:MGI Symbol;Acc:MGI:1913150]  | GO:0034144 | negative regulation of toll-like receptor 4 signaling pathway                                  |
| Trem2    | triggering receptor expressed on myeloid cells 2 [Source:MGI Symbol;Acc:MGI:1913150]  | GO:0034151 | regulation of toll-like receptor 6 signaling pathway                                           |
| Trem2    | triggering receptor expressed on myeloid cells 2 [Source:MGI Symbol;Acc:MGI:1913150]  | GO:0034351 | negative regulation of glial cell apoptotic process                                            |
| Trem2    | triggering receptor expressed on myeloid cells 2 [Source:MGI Symbol;Acc:MGI:1913150]  | GO:0043124 | negative regulation of canonical NF-kappaB signal transduction                                 |
| Trem2    | triggering receptor expressed on myeloid cells 2 [Source:MGI Symbol;Acc:MGI:1913150]  | GO:0045728 | respiratory burst after phagocytosis                                                           |
| Trem2    | triggering receptor expressed on myeloid cells 2 [Source:MGI Symbol;Acc:MGI:1913150]  | GO:0045960 | positive regulation of complement activation, classical pathway                                |
| Trem2    | triggering receptor expressed on myeloid cells 2 [Source:MGI Symbol;Acc:MGI:1913150]  | GO:0050850 | positive regulation of calcium-mediated signaling                                              |
| Trem2    | triggering receptor expressed on myeloid cells 2 [Source:MGI Symbol;Acc:MGI:1913150]  | GO:0050866 | negative regulation of cell activation                                                         |
| Trem2    | triggering receptor expressed on myeloid cells 2 [Source:MGI Symbol;Acc:MGI:1913150]  | GO:0050921 | positive regulation of chemotaxis                                                              |
| Trem2    | triggering receptor expressed on myeloid cells 2 [Source:MGI Symbol;Acc:MGI:1913150]  | GO:0051897 | positive regulation of phosphatidylinositol 3-kinase/protein kinase B signal transduction      |
| Trem2    | triggering receptor expressed on myeloid cells 2 [Source:MGI Symbol;Acc:MGI:1913150]  | GO:0050508 | lipid homeostasis                                                                              |
| Trem2    | triggering receptor expressed on myeloid cells 2 [Source:MGI Symbol;Acc:MGI:1913150]  | GO:0060075 | regulation of resting membrane potential                                                       |
| Trem2    | triggering receptor expressed on myeloid cells 2 [Source:MGI Symbol;Acc:MGI:1913150]  | GO:0070345 | negative regulation of fat cell proliferation                                                  |
| Trem2    | triggering receptor expressed on myeloid cells 2 [Source:MGI Symbol;Acc:MGI:1913150]  | GO:0070392 | detection of lipoteichoic acid                                                                 |
| Trem2    | triggering receptor expressed on myeloid cells 2 [Source:MGI Symbol;Acc:MGI:1913150]  | GO:0071223 | cellular response to lipoteichoic acid                                                         |
| Trem2    | triggering receptor expressed on myeloid cells 2 [Source:MGI Symbol;Acc:MGI:1913150]  | GO:0071224 | cellular response to peptidoglycan                                                             |
| Trem2    | triggering receptor expressed on myeloid cells 2 [Source:MGI Symbol;Acc:MGI:1913150]  | GO:0071640 | regulation of macrophage inflammatory protein 1 alpha production                               |
| Trem2    | triggering receptor expressed on myeloid cells 2 [Source:MGI Symbol;Acc:MGI:1913150]  | GO:0097062 | dendritic spine maintenance                                                                    |
| Trem2    | triggering receptor expressed on myeloid cells 2 [Source:MGI Symbol;Acc:MGI:1913150]  | GO:0097242 | amyloid-beta clearance                                                                         |
| Trem2    | triggering receptor expressed on myeloid cells 2 [Source:MGI Symbol;Acc:MGI:1913150]  | GO:0098657 | import into cell                                                                               |
| Trem2    | triggering receptor expressed on myeloid cells 2 [Source:MGI Symbol;Acc:MGI:1913150]  | GO:0110089 | regulation of hippocampal neuron apoptotic process                                             |
| Trem2    | triggering receptor expressed on myeloid cells 2 [Source:MGI Symbol;Acc:MGI:1913150]  | GO:0150062 | complement-mediated synapse pruning                                                            |
| Trem2    | triggering receptor expressed on myeloid cells 2 [Source:MGI Symbol;Acc:MGI:1913150]  | GO:0150078 | positive regulation of neuroinflammatory response                                              |
| Trem2    | triggering receptor expressed on myeloid cells 2 [Source:MGI Symbol;Acc:MGI:1913150]  | GO:1900015 | regulation of cytokine production involved in inflammatory response                            |
| Trem2    | triggering receptor expressed on myeloid cells 2 [Source:MGI Symbol;Acc:MGI:1913150]  | GO:1901980 | positive regulation of inward rectifier potassium channel activity                             |
| Trem2    | triggering receptor expressed on myeloid cells 2 [Source:MGI Symbol;Acc:MGI:1913150]  | GO:1902227 | negative regulation of macrophage colony-stimulating factor signaling pathway                  |
| Trem2    | triggering receptor expressed on myeloid cells 2 [Source:MGI Symbol;Acc:MGI:1913150]  | GO:1902531 | regulation of intracellular signal transduction                                                |
| Trem2    | triggering receptor expressed on myeloid cells 2 [Source:MGI Symbol;Acc:MGI:1913150]  | GO:1903376 | regulation of oxidative stress-induced neuron intrinsic apoptotic signaling pathway            |
| Trem2    | triggering receptor expressed on myeloid cells 2 [Source:MGI Symbol;Acc:MGI:1913150]  | GO:1903753 | negative regulation of p38MAPK cascade                                                         |
| Trem2    | triggering receptor expressed on myeloid cells 2 [Source:MGI Symbol;Acc:MGI:1913150]  | GO:1904093 | negative regulation of autophagic cell death                                                   |
| Trem2    | triggering receptor expressed on myeloid cells 2 [Source:MGI Symbol;Acc:MGI:1913150]  | GO:1904141 | positive regulation of microglial cell migration                                               |
| Trem2    | triggering receptor expressed on myeloid cells 2 [Source:MGI Symbol;Acc:MGI:1913150]  | GO:1904951 | positive regulation of establishment of protein localization                                   |
| Trem2    | triggering receptor expressed on myeloid cells 2 [Source:MGI Symbol;Acc:MGI:1913150]  | GO:1905291 | positive regulation of CAMKK-AMPK signaling cascade                                            |
| Trem2    | triggering receptor expressed on myeloid cells 2 [Source:MGI Symbol;Acc:MGI:1913150]  | GO:1905581 | positive regulation of low-density lipoprotein particle clearance                              |
| Trem2    | triggering receptor expressed on myeloid cells 2 [Source:MGI Symbol;Acc:MGI:1913150]  | GO:1905805 | excitatory synapse pruning                                                                     |
| Trem2    | triggering receptor expressed on myeloid cells 2 [Source:MGI Symbol;Acc:MGI:1913150]  | GO:1905808 | positive regulation of synapse pruning                                                         |
| Trem2    | triggering receptor expressed on myeloid cells 2 [Source:MGI Symbol;Acc:MGI:1913150]  | GO:0001540 | amyloid-beta binding                                                                           |
| Trem2    | triggering receptor expressed on myeloid cells 2 [Source:MGI Symbol;Acc:MGI:1913150]  | GO:0008013 | beta-catenin binding                                                                           |
| Trem2    | triggering receptor expressed on myeloid cells 2 [Source:MGI Symbol;Acc:MGI:1913150]  | GO:0008035 | high-density lipoprotein particle binding                                                      |
| Trem2    | triggering receptor expressed on myeloid cells 2 [Source:MGI Symbol;Acc:MGI:1913150]  | GO:0008429 | phosphatidylethanolamine binding                                                               |
| Trem2    | triggering receptor expressed on myeloid cells 2 [Source:MGI Symbol;Acc:MGI:1913150]  | GO:0030169 | low-density lipoprotein particle binding                                                       |
| Trem2    | triggering receptor expressed on myeloid cells 2 [Source:MGI Symbol;Acc:MGI:1913150]  | GO:0034185 | apolipoprotein binding                                                                         |
| Trem2    | triggering receptor expressed on myeloid cells 2 [Source:MGI Symbol;Acc:MGI:1913150]  | GO:0034186 | apolipoprotein A-1 binding                                                                     |
| Trem2    | triggering receptor expressed on myeloid cells 2 [Source:MGI Symbol;Acc:MGI:1913150]  | GO:0034189 | very-low-density lipoprotein particle binding                                                  |
| Trem2    | triggering receptor expressed on myeloid cells 2 [Source:MGI Symbol;Acc:MGI:1913150]  | GO:0044877 | protein-containing complex binding                                                             |
| Trem2    | triggering receptor expressed on myeloid cells 2 [Source:MGI Symbol;Acc:MGI:1913150]  | GO:0071813 | lipoprotein particle binding                                                                   |
| Trem2    | triggering receptor expressed on myeloid cells 2 [Source:MGI Symbol;Acc:MGI:1913150]  | GO:0097110 | scaffold protein binding                                                                       |
| Trem2    | triggering receptor expressed on myeloid cells 2 [Source:MGI Symbol;Acc:MGI:1913150]  | GO:0002588 | positive regulation of antigen processing and presentation of peptide antigen via MHC class II |
| Trem2    | triggering receptor expressed on myeloid cells 2 [Source:MGI Symbol;Acc:MGI:1913150]  | GO:0006910 | phagocytosis, recognition                                                                      |
| Trem2    | triggering receptor expressed on myeloid cells 2 [Source:MGI Symbol;Acc:MGI:1913150]  | GO:0007613 | memory                                                                                         |
| Trem2    | triggering receptor expressed on myeloid cells 2 [Source:MGI Symbol;Acc:MGI:1913150]  | GO:0019216 | regulation of lipid metabolic process                                                          |
| Trem2    | triggering receptor expressed on myeloid cells 2 [Source:MGI Symbol;Acc:MGI:1913150]  | GO:0050714 | positive regulation of protein secretion                                                       |
| Trem2    | triggering receptor expressed on myeloid cells 2 [Source:MGI Symbol;Acc:MGI:1913150]  | GO:0050731 | positive regulation of peptidyl-tyrosine phosphorylation                                       |
| Trem2    | triggering receptor expressed on myeloid cells 2 [Source:MGI Symbol;Acc:MGI:1913150]  | GO:0071396 | cellular response to lipid                                                                     |
| Trem2    | triggering receptor expressed on myeloid cells 2 [Source:MGI Symbol;Acc:MGI:1913150]  | GO:0071402 | cellular response to lipoprotein particle stimulus                                             |
| Trem2    | triggering receptor expressed on myeloid cells 2 [Source:MGI Symbol;Acc:MGI:1913150]  | GO:0097028 | dendritic cell differentiation                                                                 |
| Trem2    | triggering receptor expressed on myeloid cells 2 [Source:MGI Symbol;Acc:MGI:1913150]  | GO:0140052 | cellular response to oxidised low-density lipoprotein particle stimulus                        |
| Trem2    | triggering receptor expressed on myeloid cells 2 [Source:MGI Symbol;Acc:MGI:1913150]  | GO:1901076 | positive regulation of engulfment of apoptotic cell                                            |
| Trem2    | triggering receptor expressed on myeloid cells 2 [Source:MGI Symbol;Acc:MGI:1913150]  | GO:1903078 | positive regulation of protein localization to plasma membrane                                 |
| Trem2    | triggering receptor expressed on myeloid cells 2 [Source:MGI Symbol;Acc:MGI:1913150]  | GO:1903082 | positive regulation of C-C chemokine receptor CCR7 signaling pathway                           |
| Trem2    | triggering receptor expressed on myeloid cells 2 [Source:MGI Symbol;Acc:MGI:1913150]  | GO:2000350 | positive regulation of CD40 signaling pathway                                                  |
| Trem2    | triggering receptor expressed on myeloid cells 2 [Source:MGI Symbol;Acc:MGI:1913150]  | GO:0016020 | membrane                                                                                       |
| Trem2    | triggering receptor expressed on myeloid cells 2 [Source:MGI Symbol;Acc:MGI:1913150]  | GO:0044853 | plasma membrane raft                                                                           |
| Arhgef18 | Rho/Rac guanine nucleotide exchange factor 18 [Source:MGI Symbol;Acc:MGI:2142567]     | GO:0005085 | guanyl-nucleotide exchange factor activity                                                     |
| Arhgef18 | Rho/Rac guanine nucleotide exchange factor 18 [Source:MGI Symbol;Acc:MGI:2142567]     | GO:0007264 | small GTPase-mediated signal transduction                                                      |
| Arhgef18 | Rho/Rac guanine nucleotide exchange factor 18 [Source:MGI Symbol;Acc:MGI:2142567]     | GO:0005737 | cytoplasm                                                                                      |
| Arhgef18 | Rho/Rac guanine nucleotide exchange factor 18 [Source:MGI Symbol;Acc:MGI:2142567]     | GO:0008360 | regulation of cell shape                                                                       |
| Arhgef18 | Rho/Rac guanine nucleotide exchange factor 18 [Source:MGI Symbol;Acc:MGI:2142567]     | GO:0030036 | actin cytoskeleton organization                                                                |
| Arhgef18 | Rho/Rac guanine nucleotide exchange factor 18 [Source:MGI Symbol;Acc:MGI:2142567]     | GO:0051497 | negative regulation of stress fiber assembly                                                   |
| Arhgef18 | Rho/Rac guanine nucleotide exchange factor 18 [Source:MGI Symbol;Acc:MGI:2142567]     | GO:0150105 | protein localization to cell-cell junction                                                     |
| Arhgef18 | Rho/Rac guanine nucleotide exchange factor 18 [Source:MGI Symbol;Acc:MGI:2142567]     | GO:0005829 | cytosol                                                                                        |
| Arhgef18 | Rho/Rac guanine nucleotide exchange factor 18 [Source:MGI Symbol;Acc:MGI:2142567]     | GO:0005886 | plasma membrane                                                                                |
| Arhgef18 | Rho/Rac guanine nucleotide exchange factor 18 [Source:MGI Symbol;Acc:MGI:2142567]     | GO:0045177 | apical part of cell                                                                            |
| Arhgef18 | Rho/Rac guanine nucleotide exchange factor 18 [Source:MGI Symbol;Acc:MGI:2142567]     | GO:0046872 | metal ion binding                                                                              |
| Arhgef18 | Rho/Rac guanine nucleotide exchange factor 18 [Source:MGI Symbol;Acc:MGI:2142567]     | GO:0016324 | apical plasma membrane                                                                         |
| Arhgef18 | Rho/Rac guanine nucleotide exchange factor 18 [Source:MGI Symbol;Acc:MGI:2142567]     | GO:0005856 | cytoskeleton                                                                                   |
| Arhgef18 | Rho/Rac guanine nucleotide exchange factor 18 [Source:MGI Symbol;Acc:MGI:2142567]     | GO:0035023 | regulation of Rho protein signal transduction                                                  |
| Lrrc8c   | leucine rich repeat containing 8 family, member C [Source:MGI Symbol;Acc:MGI:2140839] | GO:0005515 | protein binding                                                                                |
| Lrrc8c   | leucine rich repeat containing 8 family, member C [Source:MGI Symbol;Acc:MGI:2140839] | GO:0005886 | plasma membrane                                                                                |
| Lrrc8c   | leucine rich repeat containing 8 family, member C [Source:MGI Symbol;Acc:MGI:2140839] | GO:0005783 | endoplasmic reticulum                                                                          |
| Lrrc8c   | leucine rich repeat containing 8 family, member C [Source:MGI Symbol;Acc:MGI:2140839] | GO:0005789 | endoplasmic reticulum membrane                                                                 |
| Lrrc8c   | leucine rich repeat containing 8 family, member C [Source:MGI Symbol;Acc:MGI:2140839] | GO:0034220 | monoatomic ion transmembrane transport                                                         |
| Lrrc8c   | leucine rich repeat containing 8 family, member C [Source:MGI Symbol;Acc:MGI:2140839] | GO:0034702 | monoatomic ion channel complex                                                                 |
| Lrrc8c   | leucine rich repeat containing 8 family, member C [Source:MGI Symbol;Acc:MGI:2140839] | GO:0005737 | cytoplasm                                                                                      |
| Lrrc8c   | leucine rich repeat containing 8 family, member C [Source:MGI Symbol;Acc:MGI:2140839] | GO:0005085 | transmembrane transport                                                                        |
| Lrrc8c   | leucine rich repeat containing 8 family, member C [Source:MGI Symbol;Acc:MGI:2140839] | GO:0034214 | protein hexamerization                                                                         |

|              |                                                                                             |            |                                                                       |
|--------------|---------------------------------------------------------------------------------------------|------------|-----------------------------------------------------------------------|
| Lrrc8c       | leucine rich repeat containing 8 family, member C [Source:MGI Symbol;Acc:MGI:2140839]       | GO:0045444 | fat cell differentiation                                              |
| Lrrc8c       | leucine rich repeat containing 8 family, member C [Source:MGI Symbol;Acc:MGI:2140839]       | GO:0015734 | taurine transmembrane transport                                       |
| Lrrc8c       | leucine rich repeat containing 8 family, member C [Source:MGI Symbol;Acc:MGI:2140839]       | GO:0140361 | cyclic-GMP-AMP transmembrane import across plasma membrane            |
| Lrrc8c       | leucine rich repeat containing 8 family, member C [Source:MGI Symbol;Acc:MGI:2140839]       | GO:0071470 | cellular response to osmotic stress                                   |
| Lrrc8c       | leucine rich repeat containing 8 family, member C [Source:MGI Symbol;Acc:MGI:2140839]       | GO:0005225 | volume-sensitive anion channel activity                               |
| Lrrc8c       | leucine rich repeat containing 8 family, member C [Source:MGI Symbol;Acc:MGI:2140839]       | GO:0015810 | aspartate transmembrane transport                                     |
| Lrrc8c       | leucine rich repeat containing 8 family, member C [Source:MGI Symbol;Acc:MGI:2140839]       | GO:0098656 | monatomic anion transmembrane transport                               |
| Lrrc8c       | leucine rich repeat containing 8 family, member C [Source:MGI Symbol;Acc:MGI:2140839]       | GO:0016020 | membrane                                                              |
| Golph3       | golgi phosphoprotein 3 [Source:MGI Symbol;Acc:MGI:1913879]                                  | GO:0070273 | phosphatidylinositol-4-phosphate binding                              |
| Golph3       | golgi phosphoprotein 3 [Source:MGI Symbol;Acc:MGI:1913879]                                  | GO:0005829 | cytosol                                                               |
| Golph3       | golgi phosphoprotein 3 [Source:MGI Symbol;Acc:MGI:1913879]                                  | GO:0005794 | Golgi apparatus                                                       |
| Golph3       | golgi phosphoprotein 3 [Source:MGI Symbol;Acc:MGI:1913879]                                  | GO:0005886 | plasma membrane                                                       |
| Golph3       | golgi phosphoprotein 3 [Source:MGI Symbol;Acc:MGI:1913879]                                  | GO:0005768 | endosome                                                              |
| Golph3       | golgi phosphoprotein 3 [Source:MGI Symbol;Acc:MGI:1913879]                                  | GO:0015031 | protein transport                                                     |
| Golph3       | golgi phosphoprotein 3 [Source:MGI Symbol;Acc:MGI:1913879]                                  | GO:0005739 | mitochondrion                                                         |
| Golph3       | golgi phosphoprotein 3 [Source:MGI Symbol;Acc:MGI:1913879]                                  | GO:0008289 | lipid binding                                                         |
| Golph3       | golgi phosphoprotein 3 [Source:MGI Symbol;Acc:MGI:1913879]                                  | GO:0032580 | Golgi cisterna membrane                                               |
| Golph3       | golgi phosphoprotein 3 [Source:MGI Symbol;Acc:MGI:1913879]                                  | GO:0016477 | cell migration                                                        |
| Golph3       | golgi phosphoprotein 3 [Source:MGI Symbol;Acc:MGI:1913879]                                  | GO:0005802 | trans-Golgi network                                                   |
| Golph3       | golgi phosphoprotein 3 [Source:MGI Symbol;Acc:MGI:1913879]                                  | GO:0005758 | mitochondrial intermembrane space                                     |
| Golph3       | golgi phosphoprotein 3 [Source:MGI Symbol;Acc:MGI:1913879]                                  | GO:0007030 | Golgi organization                                                    |
| Golph3       | golgi phosphoprotein 3 [Source:MGI Symbol;Acc:MGI:1913879]                                  | GO:0032008 | positive regulation of TOR signaling                                  |
| Golph3       | golgi phosphoprotein 3 [Source:MGI Symbol;Acc:MGI:1913879]                                  | GO:0010821 | regulation of mitochondrion organization                              |
| Golph3       | golgi phosphoprotein 3 [Source:MGI Symbol;Acc:MGI:1913879]                                  | GO:0006890 | retrograde vesicle-mediated transport, Golgi to endoplasmic reticulum |
| Golph3       | golgi phosphoprotein 3 [Source:MGI Symbol;Acc:MGI:1913879]                                  | GO:0030032 | lamellipodium assembly                                                |
| Golph3       | golgi phosphoprotein 3 [Source:MGI Symbol;Acc:MGI:1913879]                                  | GO:0000139 | Golgi membrane                                                        |
| Golph3       | golgi phosphoprotein 3 [Source:MGI Symbol;Acc:MGI:1913879]                                  | GO:0009306 | protein secretion                                                     |
| Golph3       | golgi phosphoprotein 3 [Source:MGI Symbol;Acc:MGI:1913879]                                  | GO:0050714 | positive regulation of protein secretion                              |
| Golph3       | golgi phosphoprotein 3 [Source:MGI Symbol;Acc:MGI:1913879]                                  | GO:0050901 | leukocyte tethering or rolling                                        |
| Golph3       | golgi phosphoprotein 3 [Source:MGI Symbol;Acc:MGI:1913879]                                  | GO:0060352 | cell adhesion molecule production                                     |
| Golph3       | golgi phosphoprotein 3 [Source:MGI Symbol;Acc:MGI:1913879]                                  | GO:0031985 | Golgi cisterna                                                        |
| Golph3       | golgi phosphoprotein 3 [Source:MGI Symbol;Acc:MGI:1913879]                                  | GO:0043001 | Golgi to plasma membrane protein transport                            |
| Golph3       | golgi phosphoprotein 3 [Source:MGI Symbol;Acc:MGI:1913879]                                  | GO:0010467 | gene expression                                                       |
| Golph3       | golgi phosphoprotein 3 [Source:MGI Symbol;Acc:MGI:1913879]                                  | GO:0009101 | glycoprotein biosynthetic process                                     |
| Golph3       | golgi phosphoprotein 3 [Source:MGI Symbol;Acc:MGI:1913879]                                  | GO:0072752 | cellular response to rapamycin                                        |
| Golph3       | golgi phosphoprotein 3 [Source:MGI Symbol;Acc:MGI:1913879]                                  | GO:0048194 | Golgi vesicle budding                                                 |
| Golph3       | golgi phosphoprotein 3 [Source:MGI Symbol;Acc:MGI:1913879]                                  | GO:0019899 | enzyme binding                                                        |
| Golph3       | golgi phosphoprotein 3 [Source:MGI Symbol;Acc:MGI:1913879]                                  | GO:0140312 | cargo adaptor activity                                                |
| Golph3       | golgi phosphoprotein 3 [Source:MGI Symbol;Acc:MGI:1913879]                                  | GO:0043066 | negative regulation of apoptotic process                              |
| Golph3       | golgi phosphoprotein 3 [Source:MGI Symbol;Acc:MGI:1913879]                                  | GO:0045053 | protein retention in Golgi apparatus                                  |
| Golph3       | golgi phosphoprotein 3 [Source:MGI Symbol;Acc:MGI:1913879]                                  | GO:0090161 | Golgi ribbon formation                                                |
| Golph3       | golgi phosphoprotein 3 [Source:MGI Symbol;Acc:MGI:1913879]                                  | GO:0090164 | asymmetric Golgi ribbon formation                                     |
| Golph3       | golgi phosphoprotein 3 [Source:MGI Symbol;Acc:MGI:1913879]                                  | GO:0140450 | protein targeting to Golgi apparatus                                  |
| Golph3       | golgi phosphoprotein 3 [Source:MGI Symbol;Acc:MGI:1913879]                                  | GO:0043231 | intracellular membrane-bounded organelle                              |
| Golph3       | golgi phosphoprotein 3 [Source:MGI Symbol;Acc:MGI:1913879]                                  | GO:0016020 | membrane                                                              |
| Tcim         | transcriptional and immune response regulator [Source:MGI Symbol;Acc:MGI:1916318]           | GO:0005634 | nucleus                                                               |
| Tcim         | transcriptional and immune response regulator [Source:MGI Symbol;Acc:MGI:1916318]           | GO:0005737 | cytoplasm                                                             |
| Tcim         | transcriptional and immune response regulator [Source:MGI Symbol;Acc:MGI:1916318]           | GO:0005829 | cytosol                                                               |
| Tcim         | transcriptional and immune response regulator [Source:MGI Symbol;Acc:MGI:1916318]           | GO:0005730 | nucleolus                                                             |
| Tcim         | transcriptional and immune response regulator [Source:MGI Symbol;Acc:MGI:1916318]           | GO:0016607 | nuclear speck                                                         |
| Tcim         | transcriptional and immune response regulator [Source:MGI Symbol;Acc:MGI:1916318]           | GO:0006915 | apoptotic process                                                     |
| Tcim         | transcriptional and immune response regulator [Source:MGI Symbol;Acc:MGI:1916318]           | GO:0034605 | cellular response to heat                                             |
| Tcim         | transcriptional and immune response regulator [Source:MGI Symbol;Acc:MGI:1916318]           | GO:1901224 | positive regulation of non-canonical NF-kappaB signal transduction    |
| Tcim         | transcriptional and immune response regulator [Source:MGI Symbol;Acc:MGI:1916318]           | GO:0045746 | negative regulation of Notch signaling pathway                        |
| Tcim         | transcriptional and immune response regulator [Source:MGI Symbol;Acc:MGI:1916318]           | GO:0005112 | Notch binding                                                         |
| Tcim         | transcriptional and immune response regulator [Source:MGI Symbol;Acc:MGI:1916318]           | GO:1902806 | regulation of cell cycle G1/S phase transition                        |
| Tcim         | transcriptional and immune response regulator [Source:MGI Symbol;Acc:MGI:1916318]           | GO:1903706 | regulation of hemopoiesis                                             |
| Tcim         | transcriptional and immune response regulator [Source:MGI Symbol;Acc:MGI:1916318]           | GO:0002264 | endothelial cell activation involved in immune response               |
| Tcim         | transcriptional and immune response regulator [Source:MGI Symbol;Acc:MGI:1916318]           | GO:0010739 | positive regulation of protein kinase A signaling                     |
| Tcim         | transcriptional and immune response regulator [Source:MGI Symbol;Acc:MGI:1916318]           | GO:0043066 | negative regulation of apoptotic process                              |
| Tcim         | transcriptional and immune response regulator [Source:MGI Symbol;Acc:MGI:1916318]           | GO:0005654 | nucleoplasm                                                           |
| Tcim         | transcriptional and immune response regulator [Source:MGI Symbol;Acc:MGI:1916318]           | GO:0005886 | plasma membrane                                                       |
| Gm19439      | predicted gene, 19439 [Source:MGI Symbol;Acc:MGI:5011624]                                   |            |                                                                       |
| Gm26876      | predicted gene, 26876 [Source:MGI Symbol;Acc:MGI:5477370]                                   |            |                                                                       |
| Gm4219       | predicted gene, 4219 [Source:MGI Symbol;Acc:MGI:3782395]                                    |            |                                                                       |
| Gm44294      | predicted gene, 44294 [Source:MGI Symbol;Acc:MGI:5690686]                                   |            |                                                                       |
| Gm49749      | predicted gene, 49749 [Source:MGI Symbol;Acc:MGI:6215244]                                   |            |                                                                       |
| Map4k1       | mitogen-activated protein kinase kinase kinase kinase 1 [Source:MGI Symbol;Acc:MGI:1346882] | GO:0005524 | ATP binding                                                           |
| Map4k1       | mitogen-activated protein kinase kinase kinase kinase 1 [Source:MGI Symbol;Acc:MGI:1346882] | GO:0004672 | protein kinase activity                                               |
| Map4k1       | mitogen-activated protein kinase kinase kinase kinase 1 [Source:MGI Symbol;Acc:MGI:1346882] | GO:0006468 | protein phosphorylation                                               |
| Map4k1       | mitogen-activated protein kinase kinase kinase kinase 1 [Source:MGI Symbol;Acc:MGI:1346882] | GO:0008249 | MAP kinase kinase kinase kinase activity                              |
| Map4k1       | mitogen-activated protein kinase kinase kinase kinase 1 [Source:MGI Symbol;Acc:MGI:1346882] | GO:0004674 | protein serine/threonine kinase activity                              |
| Map4k1       | mitogen-activated protein kinase kinase kinase kinase 1 [Source:MGI Symbol;Acc:MGI:1346882] | GO:0000165 | MAPK cascade                                                          |
| Map4k1       | mitogen-activated protein kinase kinase kinase kinase 1 [Source:MGI Symbol;Acc:MGI:1346882] | GO:0035556 | intracellular signal transduction                                     |
| Map4k1       | mitogen-activated protein kinase kinase kinase kinase 1 [Source:MGI Symbol;Acc:MGI:1346882] | GO:0005515 | protein binding                                                       |
| Map4k1       | mitogen-activated protein kinase kinase kinase kinase 1 [Source:MGI Symbol;Acc:MGI:1346882] | GO:0005737 | cytoplasm                                                             |
| Map4k1       | mitogen-activated protein kinase kinase kinase kinase 1 [Source:MGI Symbol;Acc:MGI:1346882] | GO:0106310 | protein serine kinase activity                                        |
| Map4k1       | mitogen-activated protein kinase kinase kinase kinase 1 [Source:MGI Symbol;Acc:MGI:1346882] | GO:0046777 | protein autophosphorylation                                           |
| Map4k1       | mitogen-activated protein kinase kinase kinase kinase 1 [Source:MGI Symbol;Acc:MGI:1346882] | GO:0018105 | peptidyl-serine phosphorylation                                       |
| Map4k1       | mitogen-activated protein kinase kinase kinase kinase 1 [Source:MGI Symbol;Acc:MGI:1346882] | GO:0008283 | cell population proliferation                                         |
| Map4k1       | mitogen-activated protein kinase kinase kinase kinase 1 [Source:MGI Symbol;Acc:MGI:1346882] | GO:0007254 | JNK cascade                                                           |
| Map4k1       | mitogen-activated protein kinase kinase kinase kinase 1 [Source:MGI Symbol;Acc:MGI:1346882] | GO:0043410 | positive regulation of MAPK cascade                                   |
| Map4k1       | mitogen-activated protein kinase kinase kinase kinase 1 [Source:MGI Symbol;Acc:MGI:1346882] | GO:1904628 | cellular response to phorbol 13-acetate 12-myristate                  |
| Gm5786       | predicted pseudogene 5786 [Source:MGI Symbol;Acc:MGI:3645003]                               |            |                                                                       |
| Gm37132      | predicted gene, 37132 [Source:MGI Symbol;Acc:MGI:5610360]                                   |            |                                                                       |
| nPr119       |                                                                                             |            |                                                                       |
| C230086J09R1 | RIKEN cDNA C230086J09 gene [Source:MGI Symbol;Acc:MGI:2443423]                              |            |                                                                       |
