# Supplementary material for: Unraveling the brain expression of BDNF in a mouse model of Anorexia Nervosa
Source: Research Square preprint supplement (doi:10.21203/rs.3.rs-6260210/v1), 2025-04-16
Supplement: Supplementary file 2 [file 22000b9f62928b5135897344.docx]

| **Supplementary Table 1**. Primers used for qPCR analysis. | | | |
| --- | --- | --- | --- |
| **Gene** | **Forward Primer** | **Reverse Primer** | **Reference** |
| PPIA | CAAATGCTGGACCAAACACAAACG | GTTCATGCCTTCTTTCACCTTCCC | NM_008907.1 |
| BDNF | CACTTTTGAGCACGTCATCG | TCCTTATGGTTTTCTTCGTTGG | NM_007540.4 |
| TrkB | CCACGGATGTTGCTGACCAAAG | GCCAAACTTGGAATGTCTCGCC | NM_001025074 |
| Nat8l | CTTCTACGACGGCATCTTGGAG | AGTGAGCGGGTCACAGCAAAAC | NM_001001985 |
