# Supplementary material for: Unraveling the brain expression of BDNF in a mouse model of Anorexia Nervosa
Source: Research Square preprint supplement (doi:10.21203/rs.3.rs-6260210/v1), 2025-04-16
Supplement: Supplementary file 3 [file 3c46a1c754a03aaa26307110.docx]

| **Supplementary Table 6.** Top gene expression in interaction between chronic food restriction and wheel running. CR: caloric restriction; DS: dorsal striatum; PFC: Prefrontal cortex | | |
| --- | --- | --- |
| **Tissue** |  | **Top genes** |
| DS | ↓by CR but ↑with running wheel | B230216N24Rik, Pnldc1, Ecm1, Mecr, Gm16006, Ddrgk1, Slc16a11, Fasn, Zc3h13, H3f3c, Rps3, Gm4617, Egr4, Tbca, Surf2, Cbx8, Gm10277 |
| ↑by CR but ↓with running wheel | Trav9d-4, Gemin8, Inpp4b, Myo5b, Sod2, Itgb8, Kcng3, Hrk, Pcdhga11, Fam168a |
| PFC | ↓by CR but ↑with running wheel | Chrdl2, Zbtb48, Atat1, Tceal5 |
| ↑by CR but ↓with running wheel | Tuba1c, Cyp2s1, Gm2981 |
| *Genes with an adjusted p-value < 0.05 and a Log2Fold Change <-0.5 or >0.5 were selected for inclusion." | | |
