# Supplementary material for: Unraveling the brain expression of BDNF in a mouse model of Anorexia Nervosa
Source: Research Square preprint supplement (doi:10.21203/rs.3.rs-6260210/v1), 2025-04-16
Supplement: Supplementary file 4 [file 3d89a0e2b0a5b2e352f1d578.xlsx]

## Sheet: Supplementary Table 7
Supplementary Table 7: Functional Annotation of Differentially Expressed Genes in the dorsal striatum from Supplementary Table 6
external_gene_name	description	go_id	name_1006
B230216N24Rik	RIKEN cDNA B230216N24 gene [Source:MGI Symbol;Acc:MGI:1925853]
B230216N24Rik	RIKEN cDNA B230216N24 gene [Source:MGI Symbol;Acc:MGI:1925853]	GO:0003674	molecular_function
B230216N24Rik	RIKEN cDNA B230216N24 gene [Source:MGI Symbol;Acc:MGI:1925853]	GO:0008150	biological_process
B230216N24Rik	RIKEN cDNA B230216N24 gene [Source:MGI Symbol;Acc:MGI:1925853]	GO:0005575	cellular_component
Pnldc1	poly(A)-specific ribonuclease (PARN)-like domain containing 1 [Source:MGI Symbol;Acc:MGI:2685159]	GO:0003676	nucleic acid binding
Pnldc1	poly(A)-specific ribonuclease (PARN)-like domain containing 1 [Source:MGI Symbol;Acc:MGI:2685159]	GO:0004535	poly(A)-specific ribonuclease activity
Pnldc1	poly(A)-specific ribonuclease (PARN)-like domain containing 1 [Source:MGI Symbol;Acc:MGI:2685159]	GO:0000175	3'-5'-RNA exonuclease activity
Pnldc1	poly(A)-specific ribonuclease (PARN)-like domain containing 1 [Source:MGI Symbol;Acc:MGI:2685159]	GO:0016020	membrane
Pnldc1	poly(A)-specific ribonuclease (PARN)-like domain containing 1 [Source:MGI Symbol;Acc:MGI:2685159]	GO:0046872	metal ion binding
Pnldc1	poly(A)-specific ribonuclease (PARN)-like domain containing 1 [Source:MGI Symbol;Acc:MGI:2685159]	GO:0005783	endoplasmic reticulum
Pnldc1	poly(A)-specific ribonuclease (PARN)-like domain containing 1 [Source:MGI Symbol;Acc:MGI:2685159]	GO:0005789	endoplasmic reticulum membrane
Pnldc1	poly(A)-specific ribonuclease (PARN)-like domain containing 1 [Source:MGI Symbol;Acc:MGI:2685159]	GO:0003723	RNA binding
Pnldc1	poly(A)-specific ribonuclease (PARN)-like domain containing 1 [Source:MGI Symbol;Acc:MGI:2685159]	GO:0005634	nucleus
Pnldc1	poly(A)-specific ribonuclease (PARN)-like domain containing 1 [Source:MGI Symbol;Acc:MGI:2685159]	GO:0004527	exonuclease activity
Pnldc1	poly(A)-specific ribonuclease (PARN)-like domain containing 1 [Source:MGI Symbol;Acc:MGI:2685159]	GO:0000184	nuclear-transcribed mRNA catabolic process, nonsense-mediated decay
Pnldc1	poly(A)-specific ribonuclease (PARN)-like domain containing 1 [Source:MGI Symbol;Acc:MGI:2685159]	GO:0001825	blastocyst formation
Pnldc1	poly(A)-specific ribonuclease (PARN)-like domain containing 1 [Source:MGI Symbol;Acc:MGI:2685159]	GO:0000289	nuclear-transcribed mRNA poly(A) tail shortening
Pnldc1	poly(A)-specific ribonuclease (PARN)-like domain containing 1 [Source:MGI Symbol;Acc:MGI:2685159]	GO:0007283	spermatogenesis
Pnldc1	poly(A)-specific ribonuclease (PARN)-like domain containing 1 [Source:MGI Symbol;Acc:MGI:2685159]	GO:0034587	piRNA processing
Pnldc1	poly(A)-specific ribonuclease (PARN)-like domain containing 1 [Source:MGI Symbol;Acc:MGI:2685159]	GO:1990431	priRNA 3'-end processing
Pnldc1	poly(A)-specific ribonuclease (PARN)-like domain containing 1 [Source:MGI Symbol;Acc:MGI:2685159]	GO:1990432	siRNA 3'-end processing
Pnldc1	poly(A)-specific ribonuclease (PARN)-like domain containing 1 [Source:MGI Symbol;Acc:MGI:2685159]
Ecm1	extracellular matrix protein 1 [Source:MGI Symbol;Acc:MGI:103060]	GO:0005576	extracellular region
Ecm1	extracellular matrix protein 1 [Source:MGI Symbol;Acc:MGI:103060]	GO:0007165	signal transduction
Ecm1	extracellular matrix protein 1 [Source:MGI Symbol;Acc:MGI:103060]	GO:0005615	extracellular space
Ecm1	extracellular matrix protein 1 [Source:MGI Symbol;Acc:MGI:103060]	GO:0005515	protein binding
Ecm1	extracellular matrix protein 1 [Source:MGI Symbol;Acc:MGI:103060]	GO:0006954	inflammatory response
Ecm1	extracellular matrix protein 1 [Source:MGI Symbol;Acc:MGI:103060]	GO:0006357	regulation of transcription by RNA polymerase II
Ecm1	extracellular matrix protein 1 [Source:MGI Symbol;Acc:MGI:103060]	GO:0062023	collagen-containing extracellular matrix
Ecm1	extracellular matrix protein 1 [Source:MGI Symbol;Acc:MGI:103060]	GO:0001525	angiogenesis
Ecm1	extracellular matrix protein 1 [Source:MGI Symbol;Acc:MGI:103060]	GO:0001503	ossification
Ecm1	extracellular matrix protein 1 [Source:MGI Symbol;Acc:MGI:103060]	GO:0031214	biomineral tissue development
Ecm1	extracellular matrix protein 1 [Source:MGI Symbol;Acc:MGI:103060]	GO:0001960	negative regulation of cytokine-mediated signaling pathway
Ecm1	extracellular matrix protein 1 [Source:MGI Symbol;Acc:MGI:103060]	GO:0005201	extracellular matrix structural constituent
Ecm1	extracellular matrix protein 1 [Source:MGI Symbol;Acc:MGI:103060]	GO:0030500	regulation of bone mineralization
Ecm1	extracellular matrix protein 1 [Source:MGI Symbol;Acc:MGI:103060]	GO:0045766	positive regulation of angiogenesis
Ecm1	extracellular matrix protein 1 [Source:MGI Symbol;Acc:MGI:103060]	GO:0002063	chondrocyte development
Ecm1	extracellular matrix protein 1 [Source:MGI Symbol;Acc:MGI:103060]	GO:0005134	interleukin-2 receptor binding
Ecm1	extracellular matrix protein 1 [Source:MGI Symbol;Acc:MGI:103060]	GO:0001938	positive regulation of endothelial cell proliferation
Ecm1	extracellular matrix protein 1 [Source:MGI Symbol;Acc:MGI:103060]	GO:0030502	negative regulation of bone mineralization
Ecm1	extracellular matrix protein 1 [Source:MGI Symbol;Acc:MGI:103060]	GO:0003416	endochondral bone growth
Ecm1	extracellular matrix protein 1 [Source:MGI Symbol;Acc:MGI:103060]	GO:2000404	regulation of T cell migration
Ecm1	extracellular matrix protein 1 [Source:MGI Symbol;Acc:MGI:103060]	GO:0002828	regulation of type 2 immune response
Ecm1	extracellular matrix protein 1 [Source:MGI Symbol;Acc:MGI:103060]	GO:0002020	protease binding
Ecm1	extracellular matrix protein 1 [Source:MGI Symbol;Acc:MGI:103060]	GO:0010466	negative regulation of peptidase activity
Ecm1	extracellular matrix protein 1 [Source:MGI Symbol;Acc:MGI:103060]
Mecr	mitochondrial trans-2-enoyl-CoA reductase [Source:MGI Symbol;Acc:MGI:1349441]	GO:0016491	oxidoreductase activity
Mecr	mitochondrial trans-2-enoyl-CoA reductase [Source:MGI Symbol;Acc:MGI:1349441]	GO:0005739	mitochondrion
Mecr	mitochondrial trans-2-enoyl-CoA reductase [Source:MGI Symbol;Acc:MGI:1349441]	GO:0005634	nucleus
Mecr	mitochondrial trans-2-enoyl-CoA reductase [Source:MGI Symbol;Acc:MGI:1349441]	GO:0005829	cytosol
Mecr	mitochondrial trans-2-enoyl-CoA reductase [Source:MGI Symbol;Acc:MGI:1349441]	GO:0016616	oxidoreductase activity, acting on the CH-OH group of donors, NAD or NADP as acceptor
Mecr	mitochondrial trans-2-enoyl-CoA reductase [Source:MGI Symbol;Acc:MGI:1349441]	GO:0006633	fatty acid biosynthetic process
Mecr	mitochondrial trans-2-enoyl-CoA reductase [Source:MGI Symbol;Acc:MGI:1349441]	GO:0141148	enoyl-[acyl-carrier-protein] reductase (NADPH) activity
Mecr	mitochondrial trans-2-enoyl-CoA reductase [Source:MGI Symbol;Acc:MGI:1349441]	GO:0006879	intracellular iron ion homeostasis
Mecr	mitochondrial trans-2-enoyl-CoA reductase [Source:MGI Symbol;Acc:MGI:1349441]	GO:0006631	fatty acid metabolic process
Mecr	mitochondrial trans-2-enoyl-CoA reductase [Source:MGI Symbol;Acc:MGI:1349441]	GO:0016922	nuclear receptor binding
Mecr	mitochondrial trans-2-enoyl-CoA reductase [Source:MGI Symbol;Acc:MGI:1349441]	GO:0046513	ceramide biosynthetic process
Mecr	mitochondrial trans-2-enoyl-CoA reductase [Source:MGI Symbol;Acc:MGI:1349441]	GO:0005102	signaling receptor binding
Mecr	mitochondrial trans-2-enoyl-CoA reductase [Source:MGI Symbol;Acc:MGI:1349441]
Gm16006	predicted gene 16006 [Source:MGI Symbol;Acc:MGI:3801853]
Ddrgk1	DDRGK domain containing 1 [Source:MGI Symbol;Acc:MGI:1924256]	GO:0043066	negative regulation of apoptotic process
Ddrgk1	DDRGK domain containing 1 [Source:MGI Symbol;Acc:MGI:1924256]	GO:0016020	membrane
Ddrgk1	DDRGK domain containing 1 [Source:MGI Symbol;Acc:MGI:1924256]	GO:0005783	endoplasmic reticulum
Ddrgk1	DDRGK domain containing 1 [Source:MGI Symbol;Acc:MGI:1924256]	GO:0005789	endoplasmic reticulum membrane
Ddrgk1	DDRGK domain containing 1 [Source:MGI Symbol;Acc:MGI:1924256]	GO:0051216	cartilage development
Ddrgk1	DDRGK domain containing 1 [Source:MGI Symbol;Acc:MGI:1924256]	GO:0051092	positive regulation of NF-kappaB transcription factor activity
Ddrgk1	DDRGK domain containing 1 [Source:MGI Symbol;Acc:MGI:1924256]	GO:0005515	protein binding
Ddrgk1	DDRGK domain containing 1 [Source:MGI Symbol;Acc:MGI:1924256]	GO:0072344	rescue of stalled ribosome
Ddrgk1	DDRGK domain containing 1 [Source:MGI Symbol;Acc:MGI:1924256]	GO:0032790	ribosome disassembly
Ddrgk1	DDRGK domain containing 1 [Source:MGI Symbol;Acc:MGI:1924256]	GO:0034976	response to endoplasmic reticulum stress
Ddrgk1	DDRGK domain containing 1 [Source:MGI Symbol;Acc:MGI:1924256]	GO:1900100	positive regulation of plasma cell differentiation
Ddrgk1	DDRGK domain containing 1 [Source:MGI Symbol;Acc:MGI:1924256]	GO:0032435	negative regulation of proteasomal ubiquitin-dependent protein catabolic process
Ddrgk1	DDRGK domain containing 1 [Source:MGI Symbol;Acc:MGI:1924256]	GO:1903895	negative regulation of IRE1-mediated unfolded protein response
Ddrgk1	DDRGK domain containing 1 [Source:MGI Symbol;Acc:MGI:1924256]	GO:0044389	ubiquitin-like protein ligase binding
Ddrgk1	DDRGK domain containing 1 [Source:MGI Symbol;Acc:MGI:1924256]	GO:0070972	protein localization to endoplasmic reticulum
Ddrgk1	DDRGK domain containing 1 [Source:MGI Symbol;Acc:MGI:1924256]	GO:0033146	regulation of intracellular estrogen receptor signaling pathway
Ddrgk1	DDRGK domain containing 1 [Source:MGI Symbol;Acc:MGI:1924256]	GO:0061709	reticulophagy
Ddrgk1	DDRGK domain containing 1 [Source:MGI Symbol;Acc:MGI:1924256]	GO:0071569	protein ufmylation
Ddrgk1	DDRGK domain containing 1 [Source:MGI Symbol;Acc:MGI:1924256]	GO:1990592	protein K69-linked ufmylation
Ddrgk1	DDRGK domain containing 1 [Source:MGI Symbol;Acc:MGI:1924256]	GO:1901800	positive regulation of proteasomal protein catabolic process
Ddrgk1	DDRGK domain containing 1 [Source:MGI Symbol;Acc:MGI:1924256]	GO:0061629	RNA polymerase II-specific DNA-binding transcription factor binding
Ddrgk1	DDRGK domain containing 1 [Source:MGI Symbol;Acc:MGI:1924256]	GO:0141185	UFM1-modified protein reader activity
Ddrgk1	DDRGK domain containing 1 [Source:MGI Symbol;Acc:MGI:1924256]	GO:0008284	positive regulation of cell population proliferation
Ddrgk1	DDRGK domain containing 1 [Source:MGI Symbol;Acc:MGI:1924256]	GO:0010628	positive regulation of gene expression
Ddrgk1	DDRGK domain containing 1 [Source:MGI Symbol;Acc:MGI:1924256]	GO:0010629	negative regulation of gene expression
Ddrgk1	DDRGK domain containing 1 [Source:MGI Symbol;Acc:MGI:1924256]	GO:0030335	positive regulation of cell migration
Ddrgk1	DDRGK domain containing 1 [Source:MGI Symbol;Acc:MGI:1924256]	GO:0031647	regulation of protein stability
Ddrgk1	DDRGK domain containing 1 [Source:MGI Symbol;Acc:MGI:1924256]	GO:0032436	positive regulation of proteasomal ubiquitin-dependent protein catabolic process
Ddrgk1	DDRGK domain containing 1 [Source:MGI Symbol;Acc:MGI:1924256]	GO:0045944	positive regulation of transcription by RNA polymerase II
Ddrgk1	DDRGK domain containing 1 [Source:MGI Symbol;Acc:MGI:1924256]	GO:0140501	positive regulation of reticulophagy
Ddrgk1	DDRGK domain containing 1 [Source:MGI Symbol;Acc:MGI:1924256]	GO:1903052	positive regulation of proteolysis involved in protein catabolic process
Ddrgk1	DDRGK domain containing 1 [Source:MGI Symbol;Acc:MGI:1924256]	GO:1903721	positive regulation of I-kappaB phosphorylation
Ddrgk1	DDRGK domain containing 1 [Source:MGI Symbol;Acc:MGI:1924256]	GO:1903898	negative regulation of PERK-mediated unfolded protein response
Ddrgk1	DDRGK domain containing 1 [Source:MGI Symbol;Acc:MGI:1924256]	GO:1905552	positive regulation of protein localization to endoplasmic reticulum
Ddrgk1	DDRGK domain containing 1 [Source:MGI Symbol;Acc:MGI:1924256]	GO:0005730	nucleolus
Ddrgk1	DDRGK domain containing 1 [Source:MGI Symbol;Acc:MGI:1924256]
Slc16a11	solute carrier family 16 (monocarboxylic acid transporters), member 11 [Source:MGI Symbol;Acc:MGI:2663709]	GO:0022857	transmembrane transporter activity
Slc16a11	solute carrier family 16 (monocarboxylic acid transporters), member 11 [Source:MGI Symbol;Acc:MGI:2663709]	GO:0055085	transmembrane transport
Slc16a11	solute carrier family 16 (monocarboxylic acid transporters), member 11 [Source:MGI Symbol;Acc:MGI:2663709]	GO:0006629	lipid metabolic process
Slc16a11	solute carrier family 16 (monocarboxylic acid transporters), member 11 [Source:MGI Symbol;Acc:MGI:2663709]	GO:0005886	plasma membrane
Slc16a11	solute carrier family 16 (monocarboxylic acid transporters), member 11 [Source:MGI Symbol;Acc:MGI:2663709]	GO:0015293	symporter activity
Slc16a11	solute carrier family 16 (monocarboxylic acid transporters), member 11 [Source:MGI Symbol;Acc:MGI:2663709]	GO:0005783	endoplasmic reticulum
Slc16a11	solute carrier family 16 (monocarboxylic acid transporters), member 11 [Source:MGI Symbol;Acc:MGI:2663709]	GO:0005789	endoplasmic reticulum membrane
Slc16a11	solute carrier family 16 (monocarboxylic acid transporters), member 11 [Source:MGI Symbol;Acc:MGI:2663709]	GO:0008028	monocarboxylic acid transmembrane transporter activity
Slc16a11	solute carrier family 16 (monocarboxylic acid transporters), member 11 [Source:MGI Symbol;Acc:MGI:2663709]	GO:0015718	monocarboxylic acid transport
Slc16a11	solute carrier family 16 (monocarboxylic acid transporters), member 11 [Source:MGI Symbol;Acc:MGI:2663709]	GO:0050833	pyruvate transmembrane transporter activity
Slc16a11	solute carrier family 16 (monocarboxylic acid transporters), member 11 [Source:MGI Symbol;Acc:MGI:2663709]	GO:1901475	pyruvate transmembrane transport
Slc16a11	solute carrier family 16 (monocarboxylic acid transporters), member 11 [Source:MGI Symbol;Acc:MGI:2663709]
Slc16a11	solute carrier family 16 (monocarboxylic acid transporters), member 11 [Source:MGI Symbol;Acc:MGI:2663709]	GO:0016020	membrane
Fasn	fatty acid synthase [Source:MGI Symbol;Acc:MGI:95485]	GO:0016491	oxidoreductase activity
Fasn	fatty acid synthase [Source:MGI Symbol;Acc:MGI:95485]	GO:0016746	acyltransferase activity
Fasn	fatty acid synthase [Source:MGI Symbol;Acc:MGI:95485]	GO:0009058	biosynthetic process
Fasn	fatty acid synthase [Source:MGI Symbol;Acc:MGI:95485]	GO:0016740	transferase activity
Fasn	fatty acid synthase [Source:MGI Symbol;Acc:MGI:95485]	GO:0006633	fatty acid biosynthetic process
Fasn	fatty acid synthase [Source:MGI Symbol;Acc:MGI:95485]	GO:0004315	3-oxoacyl-[acyl-carrier-protein] synthase activity
Fasn	fatty acid synthase [Source:MGI Symbol;Acc:MGI:95485]	GO:0031177	phosphopantetheine binding
Fasn	fatty acid synthase [Source:MGI Symbol;Acc:MGI:95485]	GO:0005739	mitochondrion
Fasn	fatty acid synthase [Source:MGI Symbol;Acc:MGI:95485]	GO:0006954	inflammatory response
Fasn	fatty acid synthase [Source:MGI Symbol;Acc:MGI:95485]	GO:0090557	establishment of endothelial intestinal barrier
Fasn	fatty acid synthase [Source:MGI Symbol;Acc:MGI:95485]	GO:0005829	cytosol
Fasn	fatty acid synthase [Source:MGI Symbol;Acc:MGI:95485]	GO:0071353	cellular response to interleukin-4
Fasn	fatty acid synthase [Source:MGI Symbol;Acc:MGI:95485]	GO:0005737	cytoplasm
Fasn	fatty acid synthase [Source:MGI Symbol;Acc:MGI:95485]	GO:0016787	hydrolase activity
Fasn	fatty acid synthase [Source:MGI Symbol;Acc:MGI:95485]	GO:0016829	lyase activity
Fasn	fatty acid synthase [Source:MGI Symbol;Acc:MGI:95485]	GO:0042470	melanosome
Fasn	fatty acid synthase [Source:MGI Symbol;Acc:MGI:95485]	GO:0006631	fatty acid metabolic process
Fasn	fatty acid synthase [Source:MGI Symbol;Acc:MGI:95485]	GO:0004312	fatty acid synthase activity
Fasn	fatty acid synthase [Source:MGI Symbol;Acc:MGI:95485]	GO:0004313	[acyl-carrier-protein] S-acetyltransferase activity
Fasn	fatty acid synthase [Source:MGI Symbol;Acc:MGI:95485]	GO:0004314	[acyl-carrier-protein] S-malonyltransferase activity
Fasn	fatty acid synthase [Source:MGI Symbol;Acc:MGI:95485]	GO:0004316	3-oxoacyl-[acyl-carrier-protein] reductase (NADPH) activity
Fasn	fatty acid synthase [Source:MGI Symbol;Acc:MGI:95485]	GO:0016297	fatty acyl-[ACP] hydrolase activity
Fasn	fatty acid synthase [Source:MGI Symbol;Acc:MGI:95485]	GO:0019171	(3R)-hydroxyacyl-[acyl-carrier-protein] dehydratase activity
Fasn	fatty acid synthase [Source:MGI Symbol;Acc:MGI:95485]	GO:0141148	enoyl-[acyl-carrier-protein] reductase (NADPH) activity
Fasn	fatty acid synthase [Source:MGI Symbol;Acc:MGI:95485]	GO:0042802	identical protein binding
Fasn	fatty acid synthase [Source:MGI Symbol;Acc:MGI:95485]	GO:0042587	glycogen granule
Fasn	fatty acid synthase [Source:MGI Symbol;Acc:MGI:95485]	GO:0030224	monocyte differentiation
Fasn	fatty acid synthase [Source:MGI Symbol;Acc:MGI:95485]	GO:0009888	tissue development
Fasn	fatty acid synthase [Source:MGI Symbol;Acc:MGI:95485]	GO:0030223	neutrophil differentiation
Fasn	fatty acid synthase [Source:MGI Symbol;Acc:MGI:95485]	GO:0002068	glandular epithelial cell development
Fasn	fatty acid synthase [Source:MGI Symbol;Acc:MGI:95485]	GO:0008610	lipid biosynthetic process
Fasn	fatty acid synthase [Source:MGI Symbol;Acc:MGI:95485]	GO:0006084	acetyl-CoA metabolic process
Fasn	fatty acid synthase [Source:MGI Symbol;Acc:MGI:95485]	GO:0008611	ether lipid biosynthetic process
Fasn	fatty acid synthase [Source:MGI Symbol;Acc:MGI:95485]	GO:0030879	mammary gland development
Fasn	fatty acid synthase [Source:MGI Symbol;Acc:MGI:95485]	GO:0044788	modulation by host of viral process
Fasn	fatty acid synthase [Source:MGI Symbol;Acc:MGI:95485]	GO:0005794	Golgi apparatus
Fasn	fatty acid synthase [Source:MGI Symbol;Acc:MGI:95485]	GO:0005886	plasma membrane
Fasn	fatty acid synthase [Source:MGI Symbol;Acc:MGI:95485]
Zc3h13	zinc finger CCCH type containing 13 [Source:MGI Symbol;Acc:MGI:1914552]
Zc3h13	zinc finger CCCH type containing 13 [Source:MGI Symbol;Acc:MGI:1914552]	GO:0046872	metal ion binding
Zc3h13	zinc finger CCCH type containing 13 [Source:MGI Symbol;Acc:MGI:1914552]	GO:0005654	nucleoplasm
Zc3h13	zinc finger CCCH type containing 13 [Source:MGI Symbol;Acc:MGI:1914552]	GO:0005634	nucleus
Zc3h13	zinc finger CCCH type containing 13 [Source:MGI Symbol;Acc:MGI:1914552]	GO:0008380	RNA splicing
Zc3h13	zinc finger CCCH type containing 13 [Source:MGI Symbol;Acc:MGI:1914552]	GO:0006397	mRNA processing
Zc3h13	zinc finger CCCH type containing 13 [Source:MGI Symbol;Acc:MGI:1914552]	GO:0016607	nuclear speck
Zc3h13	zinc finger CCCH type containing 13 [Source:MGI Symbol;Acc:MGI:1914552]	GO:0036396	RNA N6-methyladenosine methyltransferase complex
Zc3h13	zinc finger CCCH type containing 13 [Source:MGI Symbol;Acc:MGI:1914552]	GO:2000036	regulation of stem cell population maintenance
H3f3c	H3 histone, family 3C [Source:MGI Symbol;Acc:MGI:3650546]
Rps3	ribosomal protein S3 [Source:MGI Symbol;Acc:MGI:1350917]	GO:0003735	structural constituent of ribosome
Rps3	ribosomal protein S3 [Source:MGI Symbol;Acc:MGI:1350917]	GO:0006412	translation
Rps3	ribosomal protein S3 [Source:MGI Symbol;Acc:MGI:1350917]	GO:0003723	RNA binding
Rps3	ribosomal protein S3 [Source:MGI Symbol;Acc:MGI:1350917]	GO:0015935	small ribosomal subunit
Rps3	ribosomal protein S3 [Source:MGI Symbol;Acc:MGI:1350917]	GO:0005634	nucleus
Rps3	ribosomal protein S3 [Source:MGI Symbol;Acc:MGI:1350917]	GO:0042981	regulation of apoptotic process
Rps3	ribosomal protein S3 [Source:MGI Symbol;Acc:MGI:1350917]	GO:0005737	cytoplasm
Rps3	ribosomal protein S3 [Source:MGI Symbol;Acc:MGI:1350917]	GO:0003677	DNA binding
Rps3	ribosomal protein S3 [Source:MGI Symbol;Acc:MGI:1350917]	GO:0005739	mitochondrion
Rps3	ribosomal protein S3 [Source:MGI Symbol;Acc:MGI:1350917]	GO:0005840	ribosome
Rps3	ribosomal protein S3 [Source:MGI Symbol;Acc:MGI:1350917]	GO:1990904	ribonucleoprotein complex
Rps3	ribosomal protein S3 [Source:MGI Symbol;Acc:MGI:1350917]	GO:0006281	DNA repair
Rps3	ribosomal protein S3 [Source:MGI Symbol;Acc:MGI:1350917]	GO:0005856	cytoskeleton
Rps3	ribosomal protein S3 [Source:MGI Symbol;Acc:MGI:1350917]	GO:0045202	synapse
Rps3	ribosomal protein S3 [Source:MGI Symbol;Acc:MGI:1350917]	GO:0005743	mitochondrial inner membrane
Rps3	ribosomal protein S3 [Source:MGI Symbol;Acc:MGI:1350917]	GO:0005730	nucleolus
Rps3	ribosomal protein S3 [Source:MGI Symbol;Acc:MGI:1350917]	GO:0005515	protein binding
Rps3	ribosomal protein S3 [Source:MGI Symbol;Acc:MGI:1350917]	GO:0006417	regulation of translation
Rps3	ribosomal protein S3 [Source:MGI Symbol;Acc:MGI:1350917]	GO:0006915	apoptotic process
Rps3	ribosomal protein S3 [Source:MGI Symbol;Acc:MGI:1350917]	GO:0051301	cell division
Rps3	ribosomal protein S3 [Source:MGI Symbol;Acc:MGI:1350917]	GO:0016829	lyase activity
Rps3	ribosomal protein S3 [Source:MGI Symbol;Acc:MGI:1350917]	GO:0005819	spindle
Rps3	ribosomal protein S3 [Source:MGI Symbol;Acc:MGI:1350917]	GO:0030425	dendrite
Rps3	ribosomal protein S3 [Source:MGI Symbol;Acc:MGI:1350917]	GO:1990090	cellular response to nerve growth factor stimulus
Rps3	ribosomal protein S3 [Source:MGI Symbol;Acc:MGI:1350917]	GO:0006974	DNA damage response
Rps3	ribosomal protein S3 [Source:MGI Symbol;Acc:MGI:1350917]	GO:0019900	kinase binding
Rps3	ribosomal protein S3 [Source:MGI Symbol;Acc:MGI:1350917]	GO:2001235	positive regulation of apoptotic signaling pathway
Rps3	ribosomal protein S3 [Source:MGI Symbol;Acc:MGI:1350917]	GO:0005829	cytosol
Rps3	ribosomal protein S3 [Source:MGI Symbol;Acc:MGI:1350917]	GO:0098794	postsynapse
Rps3	ribosomal protein S3 [Source:MGI Symbol;Acc:MGI:1350917]	GO:0022627	cytosolic small ribosomal subunit
Rps3	ribosomal protein S3 [Source:MGI Symbol;Acc:MGI:1350917]	GO:0022626	cytosolic ribosome
Rps3	ribosomal protein S3 [Source:MGI Symbol;Acc:MGI:1350917]	GO:0140078	class I DNA-(apurinic or apyrimidinic site) endonuclease activity
Rps3	ribosomal protein S3 [Source:MGI Symbol;Acc:MGI:1350917]	GO:0002181	cytoplasmic translation
Rps3	ribosomal protein S3 [Source:MGI Symbol;Acc:MGI:1350917]	GO:0003906	DNA-(apurinic or apyrimidinic site) endonuclease activity
Rps3	ribosomal protein S3 [Source:MGI Symbol;Acc:MGI:1350917]	GO:0000977	RNA polymerase II transcription regulatory region sequence-specific DNA binding
Rps3	ribosomal protein S3 [Source:MGI Symbol;Acc:MGI:1350917]	GO:0003684	damaged DNA binding
Rps3	ribosomal protein S3 [Source:MGI Symbol;Acc:MGI:1350917]	GO:0003729	mRNA binding
Rps3	ribosomal protein S3 [Source:MGI Symbol;Acc:MGI:1350917]	GO:0004520	DNA endonuclease activity
Rps3	ribosomal protein S3 [Source:MGI Symbol;Acc:MGI:1350917]	GO:0008017	microtubule binding
Rps3	ribosomal protein S3 [Source:MGI Symbol;Acc:MGI:1350917]	GO:0015631	tubulin binding
Rps3	ribosomal protein S3 [Source:MGI Symbol;Acc:MGI:1350917]	GO:0019899	enzyme binding
Rps3	ribosomal protein S3 [Source:MGI Symbol;Acc:MGI:1350917]	GO:0019901	protein kinase binding
Rps3	ribosomal protein S3 [Source:MGI Symbol;Acc:MGI:1350917]	GO:0030544	Hsp70 protein binding
Rps3	ribosomal protein S3 [Source:MGI Symbol;Acc:MGI:1350917]	GO:0032357	oxidized purine DNA binding
Rps3	ribosomal protein S3 [Source:MGI Symbol;Acc:MGI:1350917]	GO:0032358	oxidized pyrimidine DNA binding
Rps3	ribosomal protein S3 [Source:MGI Symbol;Acc:MGI:1350917]	GO:0044390	ubiquitin-like protein conjugating enzyme binding
Rps3	ribosomal protein S3 [Source:MGI Symbol;Acc:MGI:1350917]	GO:0044877	protein-containing complex binding
Rps3	ribosomal protein S3 [Source:MGI Symbol;Acc:MGI:1350917]	GO:0051018	protein kinase A binding
Rps3	ribosomal protein S3 [Source:MGI Symbol;Acc:MGI:1350917]	GO:0051879	Hsp90 protein binding
Rps3	ribosomal protein S3 [Source:MGI Symbol;Acc:MGI:1350917]	GO:0070181	small ribosomal subunit rRNA binding
Rps3	ribosomal protein S3 [Source:MGI Symbol;Acc:MGI:1350917]	GO:0097100	supercoiled DNA binding
Rps3	ribosomal protein S3 [Source:MGI Symbol;Acc:MGI:1350917]	GO:0140297	DNA-binding transcription factor binding
Rps3	ribosomal protein S3 [Source:MGI Symbol;Acc:MGI:1350917]	GO:0006284	base-excision repair
Rps3	ribosomal protein S3 [Source:MGI Symbol;Acc:MGI:1350917]	GO:0007059	chromosome segregation
Rps3	ribosomal protein S3 [Source:MGI Symbol;Acc:MGI:1350917]	GO:0010628	positive regulation of gene expression
Rps3	ribosomal protein S3 [Source:MGI Symbol;Acc:MGI:1350917]	GO:0017148	negative regulation of translation
Rps3	ribosomal protein S3 [Source:MGI Symbol;Acc:MGI:1350917]	GO:0031116	positive regulation of microtubule polymerization
Rps3	ribosomal protein S3 [Source:MGI Symbol;Acc:MGI:1350917]	GO:0031334	positive regulation of protein-containing complex assembly
Rps3	ribosomal protein S3 [Source:MGI Symbol;Acc:MGI:1350917]	GO:0031397	negative regulation of protein ubiquitination
Rps3	ribosomal protein S3 [Source:MGI Symbol;Acc:MGI:1350917]	GO:0032743	positive regulation of interleukin-2 production
Rps3	ribosomal protein S3 [Source:MGI Symbol;Acc:MGI:1350917]	GO:0034614	cellular response to reactive oxygen species
Rps3	ribosomal protein S3 [Source:MGI Symbol;Acc:MGI:1350917]	GO:0042104	positive regulation of activated T cell proliferation
Rps3	ribosomal protein S3 [Source:MGI Symbol;Acc:MGI:1350917]	GO:0045738	negative regulation of DNA repair
Rps3	ribosomal protein S3 [Source:MGI Symbol;Acc:MGI:1350917]	GO:0045739	positive regulation of DNA repair
Rps3	ribosomal protein S3 [Source:MGI Symbol;Acc:MGI:1350917]	GO:0050862	positive regulation of T cell receptor signaling pathway
Rps3	ribosomal protein S3 [Source:MGI Symbol;Acc:MGI:1350917]	GO:0051092	positive regulation of NF-kappaB transcription factor activity
Rps3	ribosomal protein S3 [Source:MGI Symbol;Acc:MGI:1350917]	GO:0051225	spindle assembly
Rps3	ribosomal protein S3 [Source:MGI Symbol;Acc:MGI:1350917]	GO:0061481	response to TNF agonist
Rps3	ribosomal protein S3 [Source:MGI Symbol;Acc:MGI:1350917]	GO:0070301	cellular response to hydrogen peroxide
Rps3	ribosomal protein S3 [Source:MGI Symbol;Acc:MGI:1350917]	GO:0071356	cellular response to tumor necrosis factor
Rps3	ribosomal protein S3 [Source:MGI Symbol;Acc:MGI:1350917]	GO:1901224	positive regulation of non-canonical NF-kappaB signal transduction
Rps3	ribosomal protein S3 [Source:MGI Symbol;Acc:MGI:1350917]	GO:1902231	positive regulation of intrinsic apoptotic signaling pathway in response to DNA damage
Rps3	ribosomal protein S3 [Source:MGI Symbol;Acc:MGI:1350917]	GO:1905053	positive regulation of base-excision repair
Rps3	ribosomal protein S3 [Source:MGI Symbol;Acc:MGI:1350917]	GO:0005759	mitochondrial matrix
Rps3	ribosomal protein S3 [Source:MGI Symbol;Acc:MGI:1350917]	GO:0005783	endoplasmic reticulum
Rps3	ribosomal protein S3 [Source:MGI Symbol;Acc:MGI:1350917]	GO:0005886	plasma membrane
Rps3	ribosomal protein S3 [Source:MGI Symbol;Acc:MGI:1350917]	GO:0014069	postsynaptic density
Rps3	ribosomal protein S3 [Source:MGI Symbol;Acc:MGI:1350917]	GO:0032587	ruffle membrane
Rps3	ribosomal protein S3 [Source:MGI Symbol;Acc:MGI:1350917]	GO:0072686	mitotic spindle
Rps3	ribosomal protein S3 [Source:MGI Symbol;Acc:MGI:1350917]	GO:0071159	NF-kappaB complex
Rps3	ribosomal protein S3 [Source:MGI Symbol;Acc:MGI:1350917]
Gm4617	predicted pseudogene 4617 [Source:MGI Symbol;Acc:MGI:3704225]
Egr4	early growth response 4 [Source:MGI Symbol;Acc:MGI:99252]	GO:0045944	positive regulation of transcription by RNA polymerase II
Egr4	early growth response 4 [Source:MGI Symbol;Acc:MGI:99252]	GO:0005634	nucleus
Egr4	early growth response 4 [Source:MGI Symbol;Acc:MGI:99252]	GO:0046872	metal ion binding
Egr4	early growth response 4 [Source:MGI Symbol;Acc:MGI:99252]	GO:0003677	DNA binding
Egr4	early growth response 4 [Source:MGI Symbol;Acc:MGI:99252]	GO:0000978	RNA polymerase II cis-regulatory region sequence-specific DNA binding
Egr4	early growth response 4 [Source:MGI Symbol;Acc:MGI:99252]	GO:0000981	DNA-binding transcription factor activity, RNA polymerase II-specific
Egr4	early growth response 4 [Source:MGI Symbol;Acc:MGI:99252]	GO:0006357	regulation of transcription by RNA polymerase II
Egr4	early growth response 4 [Source:MGI Symbol;Acc:MGI:99252]	GO:0000977	RNA polymerase II transcription regulatory region sequence-specific DNA binding
Tbca	tubulin cofactor A [Source:MGI Symbol;Acc:MGI:107549]	GO:0048487	beta-tubulin binding
Tbca	tubulin cofactor A [Source:MGI Symbol;Acc:MGI:107549]	GO:0007021	tubulin complex assembly
Tbca	tubulin cofactor A [Source:MGI Symbol;Acc:MGI:107549]	GO:0007023	post-chaperonin tubulin folding pathway
Tbca	tubulin cofactor A [Source:MGI Symbol;Acc:MGI:107549]	GO:0005737	cytoplasm
Tbca	tubulin cofactor A [Source:MGI Symbol;Acc:MGI:107549]	GO:0005856	cytoskeleton
Tbca	tubulin cofactor A [Source:MGI Symbol;Acc:MGI:107549]	GO:0005874	microtubule
Tbca	tubulin cofactor A [Source:MGI Symbol;Acc:MGI:107549]	GO:0015630	microtubule cytoskeleton
Tbca	tubulin cofactor A [Source:MGI Symbol;Acc:MGI:107549]	GO:0006457	protein folding
Tbca	tubulin cofactor A [Source:MGI Symbol;Acc:MGI:107549]	GO:0015631	tubulin binding
Tbca	tubulin cofactor A [Source:MGI Symbol;Acc:MGI:107549]	GO:0005730	nucleolus
Tbca	tubulin cofactor A [Source:MGI Symbol;Acc:MGI:107549]
Surf2	surfeit gene 2 [Source:MGI Symbol;Acc:MGI:98444]	GO:0003674	molecular_function
Surf2	surfeit gene 2 [Source:MGI Symbol;Acc:MGI:98444]	GO:0008150	biological_process
Surf2	surfeit gene 2 [Source:MGI Symbol;Acc:MGI:98444]	GO:0005654	nucleoplasm
Surf2	surfeit gene 2 [Source:MGI Symbol;Acc:MGI:98444]	GO:0005730	nucleolus
Surf2	surfeit gene 2 [Source:MGI Symbol;Acc:MGI:98444]	GO:0005886	plasma membrane
Surf2	surfeit gene 2 [Source:MGI Symbol;Acc:MGI:98444]	GO:0016607	nuclear speck
Surf2	surfeit gene 2 [Source:MGI Symbol;Acc:MGI:98444]
Cbx8	chromobox 8 [Source:MGI Symbol;Acc:MGI:1353589]	GO:0005634	nucleus
Cbx8	chromobox 8 [Source:MGI Symbol;Acc:MGI:1353589]	GO:0005515	protein binding
Cbx8	chromobox 8 [Source:MGI Symbol;Acc:MGI:1353589]	GO:0008284	positive regulation of cell population proliferation
Cbx8	chromobox 8 [Source:MGI Symbol;Acc:MGI:1353589]	GO:0000122	negative regulation of transcription by RNA polymerase II
Cbx8	chromobox 8 [Source:MGI Symbol;Acc:MGI:1353589]	GO:0035064	methylated histone binding
Cbx8	chromobox 8 [Source:MGI Symbol;Acc:MGI:1353589]	GO:0005694	chromosome
Cbx8	chromobox 8 [Source:MGI Symbol;Acc:MGI:1353589]	GO:0006325	chromatin organization
Cbx8	chromobox 8 [Source:MGI Symbol;Acc:MGI:1353589]	GO:0003682	chromatin binding
Cbx8	chromobox 8 [Source:MGI Symbol;Acc:MGI:1353589]	GO:0000785	chromatin
Cbx8	chromobox 8 [Source:MGI Symbol;Acc:MGI:1353589]	GO:0000792	heterochromatin
Cbx8	chromobox 8 [Source:MGI Symbol;Acc:MGI:1353589]	GO:0032967	positive regulation of collagen biosynthetic process
Cbx8	chromobox 8 [Source:MGI Symbol;Acc:MGI:1353589]	GO:0003727	single-stranded RNA binding
Cbx8	chromobox 8 [Source:MGI Symbol;Acc:MGI:1353589]	GO:0097027	ubiquitin-protein transferase activator activity
Cbx8	chromobox 8 [Source:MGI Symbol;Acc:MGI:1353589]	GO:0035102	PRC1 complex
Cbx8	chromobox 8 [Source:MGI Symbol;Acc:MGI:1353589]	GO:0031507	heterochromatin formation
Cbx8	chromobox 8 [Source:MGI Symbol;Acc:MGI:1353589]	GO:0045739	positive regulation of DNA repair
Cbx8	chromobox 8 [Source:MGI Symbol;Acc:MGI:1353589]	GO:0070301	cellular response to hydrogen peroxide
Cbx8	chromobox 8 [Source:MGI Symbol;Acc:MGI:1353589]	GO:0005654	nucleoplasm
Cbx8	chromobox 8 [Source:MGI Symbol;Acc:MGI:1353589]	GO:0031519	PcG protein complex
Cbx8	chromobox 8 [Source:MGI Symbol;Acc:MGI:1353589]
Gm10277	predicted gene 10277 [Source:MGI Symbol;Acc:MGI:3641921]	GO:0003674	molecular_function
Gm10277	predicted gene 10277 [Source:MGI Symbol;Acc:MGI:3641921]	GO:0008150	biological_process
Gm10277	predicted gene 10277 [Source:MGI Symbol;Acc:MGI:3641921]	GO:0005575	cellular_component
Trav9d-4	T cell receptor alpha variable 9D-4 [Source:MGI Symbol;Acc:MGI:4889087]
Gemin8	gem nuclear organelle associated protein 8 [Source:MGI Symbol;Acc:MGI:2384300]	GO:0000387	spliceosomal snRNP assembly
Gemin8	gem nuclear organelle associated protein 8 [Source:MGI Symbol;Acc:MGI:2384300]	GO:0032797	SMN complex
Gemin8	gem nuclear organelle associated protein 8 [Source:MGI Symbol;Acc:MGI:2384300]	GO:0005634	nucleus
Gemin8	gem nuclear organelle associated protein 8 [Source:MGI Symbol;Acc:MGI:2384300]	GO:0005737	cytoplasm
Gemin8	gem nuclear organelle associated protein 8 [Source:MGI Symbol;Acc:MGI:2384300]	GO:0005829	cytosol
Gemin8	gem nuclear organelle associated protein 8 [Source:MGI Symbol;Acc:MGI:2384300]	GO:0008380	RNA splicing
Gemin8	gem nuclear organelle associated protein 8 [Source:MGI Symbol;Acc:MGI:2384300]	GO:0006397	mRNA processing
Gemin8	gem nuclear organelle associated protein 8 [Source:MGI Symbol;Acc:MGI:2384300]	GO:0097504	Gemini of coiled bodies
Gemin8	gem nuclear organelle associated protein 8 [Source:MGI Symbol;Acc:MGI:2384300]	GO:0034719	SMN-Sm protein complex
Inpp4b	inositol polyphosphate-4-phosphatase, type II [Source:MGI Symbol;Acc:MGI:2158925]
Inpp4b	inositol polyphosphate-4-phosphatase, type II [Source:MGI Symbol;Acc:MGI:2158925]	GO:0016316	phosphatidylinositol-3,4-bisphosphate 4-phosphatase activity
Inpp4b	inositol polyphosphate-4-phosphatase, type II [Source:MGI Symbol;Acc:MGI:2158925]	GO:0036092	phosphatidylinositol-3-phosphate biosynthetic process
Inpp4b	inositol polyphosphate-4-phosphatase, type II [Source:MGI Symbol;Acc:MGI:2158925]	GO:0016020	membrane
Inpp4b	inositol polyphosphate-4-phosphatase, type II [Source:MGI Symbol;Acc:MGI:2158925]	GO:0046856	phosphatidylinositol dephosphorylation
Inpp4b	inositol polyphosphate-4-phosphatase, type II [Source:MGI Symbol;Acc:MGI:2158925]	GO:0006629	lipid metabolic process
Inpp4b	inositol polyphosphate-4-phosphatase, type II [Source:MGI Symbol;Acc:MGI:2158925]	GO:0016787	hydrolase activity
Inpp4b	inositol polyphosphate-4-phosphatase, type II [Source:MGI Symbol;Acc:MGI:2158925]	GO:0005737	cytoplasm
Inpp4b	inositol polyphosphate-4-phosphatase, type II [Source:MGI Symbol;Acc:MGI:2158925]	GO:0006874	intracellular calcium ion homeostasis
Inpp4b	inositol polyphosphate-4-phosphatase, type II [Source:MGI Symbol;Acc:MGI:2158925]	GO:0045671	negative regulation of osteoclast differentiation
Inpp4b	inositol polyphosphate-4-phosphatase, type II [Source:MGI Symbol;Acc:MGI:2158925]	GO:0008289	lipid binding
Inpp4b	inositol polyphosphate-4-phosphatase, type II [Source:MGI Symbol;Acc:MGI:2158925]	GO:0051896	regulation of phosphatidylinositol 3-kinase/protein kinase B signal transduction
Inpp4b	inositol polyphosphate-4-phosphatase, type II [Source:MGI Symbol;Acc:MGI:2158925]	GO:0046850	regulation of bone remodeling
Inpp4b	inositol polyphosphate-4-phosphatase, type II [Source:MGI Symbol;Acc:MGI:2158925]	GO:0046822	regulation of nucleocytoplasmic transport
Inpp4b	inositol polyphosphate-4-phosphatase, type II [Source:MGI Symbol;Acc:MGI:2158925]	GO:0017161	inositol-1,3,4-trisphosphate 4-phosphatase activity
Inpp4b	inositol polyphosphate-4-phosphatase, type II [Source:MGI Symbol;Acc:MGI:2158925]	GO:0034593	phosphatidylinositol bisphosphate phosphatase activity
Inpp4b	inositol polyphosphate-4-phosphatase, type II [Source:MGI Symbol;Acc:MGI:2158925]	GO:0034594	phosphatidylinositol trisphosphate phosphatase activity
Inpp4b	inositol polyphosphate-4-phosphatase, type II [Source:MGI Symbol;Acc:MGI:2158925]	GO:0052828	inositol-3,4-bisphosphate 4-phosphatase activity
Myo5b	myosin VB [Source:MGI Symbol;Acc:MGI:106598]	GO:0005524	ATP binding
Myo5b	myosin VB [Source:MGI Symbol;Acc:MGI:106598]	GO:0003774	cytoskeletal motor activity
Myo5b	myosin VB [Source:MGI Symbol;Acc:MGI:106598]	GO:0016459	myosin complex
Myo5b	myosin VB [Source:MGI Symbol;Acc:MGI:106598]	GO:0015031	protein transport
Myo5b	myosin VB [Source:MGI Symbol;Acc:MGI:106598]	GO:0003779	actin binding
Myo5b	myosin VB [Source:MGI Symbol;Acc:MGI:106598]	GO:0045184	establishment of protein localization
Myo5b	myosin VB [Source:MGI Symbol;Acc:MGI:106598]
Myo5b	myosin VB [Source:MGI Symbol;Acc:MGI:106598]	GO:0005515	protein binding
Myo5b	myosin VB [Source:MGI Symbol;Acc:MGI:106598]	GO:0031267	small GTPase binding
Myo5b	myosin VB [Source:MGI Symbol;Acc:MGI:106598]	GO:0016192	vesicle-mediated transport
Myo5b	myosin VB [Source:MGI Symbol;Acc:MGI:106598]	GO:0016197	endosomal transport
Myo5b	myosin VB [Source:MGI Symbol;Acc:MGI:106598]	GO:0045179	apical cortex
Myo5b	myosin VB [Source:MGI Symbol;Acc:MGI:106598]	GO:0032991	protein-containing complex
Sod2	superoxide dismutase 2, mitochondrial [Source:MGI Symbol;Acc:MGI:98352]	GO:0046872	metal ion binding
Sod2	superoxide dismutase 2, mitochondrial [Source:MGI Symbol;Acc:MGI:98352]	GO:0006801	superoxide metabolic process
Sod2	superoxide dismutase 2, mitochondrial [Source:MGI Symbol;Acc:MGI:98352]	GO:0004784	superoxide dismutase activity
Sod2	superoxide dismutase 2, mitochondrial [Source:MGI Symbol;Acc:MGI:98352]	GO:0016491	oxidoreductase activity
Sod2	superoxide dismutase 2, mitochondrial [Source:MGI Symbol;Acc:MGI:98352]	GO:0005759	mitochondrial matrix
Sod2	superoxide dismutase 2, mitochondrial [Source:MGI Symbol;Acc:MGI:98352]	GO:0019430	removal of superoxide radicals
Sod2	superoxide dismutase 2, mitochondrial [Source:MGI Symbol;Acc:MGI:98352]	GO:0005739	mitochondrion
Sod2	superoxide dismutase 2, mitochondrial [Source:MGI Symbol;Acc:MGI:98352]	GO:0043066	negative regulation of apoptotic process
Sod2	superoxide dismutase 2, mitochondrial [Source:MGI Symbol;Acc:MGI:98352]	GO:0007005	mitochondrion organization
Sod2	superoxide dismutase 2, mitochondrial [Source:MGI Symbol;Acc:MGI:98352]	GO:0051881	regulation of mitochondrial membrane potential
Sod2	superoxide dismutase 2, mitochondrial [Source:MGI Symbol;Acc:MGI:98352]	GO:0009791	post-embryonic development
Sod2	superoxide dismutase 2, mitochondrial [Source:MGI Symbol;Acc:MGI:98352]	GO:0045599	negative regulation of fat cell differentiation
Sod2	superoxide dismutase 2, mitochondrial [Source:MGI Symbol;Acc:MGI:98352]	GO:0060586	multicellular organismal-level iron ion homeostasis
Sod2	superoxide dismutase 2, mitochondrial [Source:MGI Symbol;Acc:MGI:98352]	GO:0006357	regulation of transcription by RNA polymerase II
Sod2	superoxide dismutase 2, mitochondrial [Source:MGI Symbol;Acc:MGI:98352]	GO:0007507	heart development
Sod2	superoxide dismutase 2, mitochondrial [Source:MGI Symbol;Acc:MGI:98352]	GO:0008217	regulation of blood pressure
Sod2	superoxide dismutase 2, mitochondrial [Source:MGI Symbol;Acc:MGI:98352]	GO:0001889	liver development
Sod2	superoxide dismutase 2, mitochondrial [Source:MGI Symbol;Acc:MGI:98352]	GO:0007626	locomotory behavior
Sod2	superoxide dismutase 2, mitochondrial [Source:MGI Symbol;Acc:MGI:98352]	GO:0022904	respiratory electron transport chain
Sod2	superoxide dismutase 2, mitochondrial [Source:MGI Symbol;Acc:MGI:98352]	GO:0005515	protein binding
Sod2	superoxide dismutase 2, mitochondrial [Source:MGI Symbol;Acc:MGI:98352]	GO:0003677	DNA binding
Sod2	superoxide dismutase 2, mitochondrial [Source:MGI Symbol;Acc:MGI:98352]	GO:0009410	response to xenobiotic stimulus
Sod2	superoxide dismutase 2, mitochondrial [Source:MGI Symbol;Acc:MGI:98352]	GO:0030097	hemopoiesis
Sod2	superoxide dismutase 2, mitochondrial [Source:MGI Symbol;Acc:MGI:98352]	GO:0043209	myelin sheath
Sod2	superoxide dismutase 2, mitochondrial [Source:MGI Symbol;Acc:MGI:98352]	GO:0042802	identical protein binding
Sod2	superoxide dismutase 2, mitochondrial [Source:MGI Symbol;Acc:MGI:98352]	GO:0045429	positive regulation of nitric oxide biosynthetic process
Sod2	superoxide dismutase 2, mitochondrial [Source:MGI Symbol;Acc:MGI:98352]	GO:0072593	reactive oxygen species metabolic process
Sod2	superoxide dismutase 2, mitochondrial [Source:MGI Symbol;Acc:MGI:98352]	GO:0034599	cellular response to oxidative stress
Sod2	superoxide dismutase 2, mitochondrial [Source:MGI Symbol;Acc:MGI:98352]	GO:0019899	enzyme binding
Sod2	superoxide dismutase 2, mitochondrial [Source:MGI Symbol;Acc:MGI:98352]	GO:0014823	response to activity
Sod2	superoxide dismutase 2, mitochondrial [Source:MGI Symbol;Acc:MGI:98352]	GO:0048678	response to axon injury
Sod2	superoxide dismutase 2, mitochondrial [Source:MGI Symbol;Acc:MGI:98352]	GO:0019825	oxygen binding
Sod2	superoxide dismutase 2, mitochondrial [Source:MGI Symbol;Acc:MGI:98352]	GO:0005743	mitochondrial inner membrane
Sod2	superoxide dismutase 2, mitochondrial [Source:MGI Symbol;Acc:MGI:98352]	GO:0048147	negative regulation of fibroblast proliferation
Sod2	superoxide dismutase 2, mitochondrial [Source:MGI Symbol;Acc:MGI:98352]	GO:0000303	response to superoxide
Sod2	superoxide dismutase 2, mitochondrial [Source:MGI Symbol;Acc:MGI:98352]	GO:0006979	response to oxidative stress
Sod2	superoxide dismutase 2, mitochondrial [Source:MGI Symbol;Acc:MGI:98352]	GO:0008630	intrinsic apoptotic signaling pathway in response to DNA damage
Sod2	superoxide dismutase 2, mitochondrial [Source:MGI Symbol;Acc:MGI:98352]	GO:0010332	response to gamma radiation
Sod2	superoxide dismutase 2, mitochondrial [Source:MGI Symbol;Acc:MGI:98352]	GO:0030145	manganese ion binding
Sod2	superoxide dismutase 2, mitochondrial [Source:MGI Symbol;Acc:MGI:98352]	GO:0008637	apoptotic mitochondrial changes
Sod2	superoxide dismutase 2, mitochondrial [Source:MGI Symbol;Acc:MGI:98352]	GO:0042311	vasodilation
Sod2	superoxide dismutase 2, mitochondrial [Source:MGI Symbol;Acc:MGI:98352]	GO:0001836	release of cytochrome c from mitochondria
Sod2	superoxide dismutase 2, mitochondrial [Source:MGI Symbol;Acc:MGI:98352]	GO:0042542	response to hydrogen peroxide
Sod2	superoxide dismutase 2, mitochondrial [Source:MGI Symbol;Acc:MGI:98352]	GO:0048666	neuron development
Sod2	superoxide dismutase 2, mitochondrial [Source:MGI Symbol;Acc:MGI:98352]	GO:0006749	glutathione metabolic process
Sod2	superoxide dismutase 2, mitochondrial [Source:MGI Symbol;Acc:MGI:98352]	GO:0008631	intrinsic apoptotic signaling pathway in response to oxidative stress
Sod2	superoxide dismutase 2, mitochondrial [Source:MGI Symbol;Acc:MGI:98352]	GO:0042554	superoxide anion generation
Sod2	superoxide dismutase 2, mitochondrial [Source:MGI Symbol;Acc:MGI:98352]	GO:0042743	hydrogen peroxide metabolic process
Sod2	superoxide dismutase 2, mitochondrial [Source:MGI Symbol;Acc:MGI:98352]	GO:0050665	hydrogen peroxide biosynthetic process
Sod2	superoxide dismutase 2, mitochondrial [Source:MGI Symbol;Acc:MGI:98352]	GO:0000302	response to reactive oxygen species
Sod2	superoxide dismutase 2, mitochondrial [Source:MGI Symbol;Acc:MGI:98352]	GO:0031667	response to nutrient levels
Sod2	superoxide dismutase 2, mitochondrial [Source:MGI Symbol;Acc:MGI:98352]	GO:0003032	detection of oxygen
Sod2	superoxide dismutase 2, mitochondrial [Source:MGI Symbol;Acc:MGI:98352]	GO:0003069	acetylcholine-mediated vasodilation involved in regulation of systemic arterial blood pressure
Sod2	superoxide dismutase 2, mitochondrial [Source:MGI Symbol;Acc:MGI:98352]	GO:0048773	erythrophore differentiation
Sod2	superoxide dismutase 2, mitochondrial [Source:MGI Symbol;Acc:MGI:98352]	GO:0055093	response to hyperoxia
Sod2	superoxide dismutase 2, mitochondrial [Source:MGI Symbol;Acc:MGI:98352]	GO:0001666	response to hypoxia
Sod2	superoxide dismutase 2, mitochondrial [Source:MGI Symbol;Acc:MGI:98352]	GO:0008285	negative regulation of cell population proliferation
Sod2	superoxide dismutase 2, mitochondrial [Source:MGI Symbol;Acc:MGI:98352]	GO:0010042	response to manganese ion
Sod2	superoxide dismutase 2, mitochondrial [Source:MGI Symbol;Acc:MGI:98352]	GO:0010043	response to zinc ion
Sod2	superoxide dismutase 2, mitochondrial [Source:MGI Symbol;Acc:MGI:98352]	GO:0010269	response to selenium ion
Sod2	superoxide dismutase 2, mitochondrial [Source:MGI Symbol;Acc:MGI:98352]	GO:0010729	positive regulation of hydrogen peroxide biosynthetic process
Sod2	superoxide dismutase 2, mitochondrial [Source:MGI Symbol;Acc:MGI:98352]	GO:0030335	positive regulation of cell migration
Sod2	superoxide dismutase 2, mitochondrial [Source:MGI Symbol;Acc:MGI:98352]	GO:0032364	intracellular oxygen homeostasis
Sod2	superoxide dismutase 2, mitochondrial [Source:MGI Symbol;Acc:MGI:98352]	GO:0032496	response to lipopolysaccharide
Sod2	superoxide dismutase 2, mitochondrial [Source:MGI Symbol;Acc:MGI:98352]	GO:0033591	response to L-ascorbic acid
Sod2	superoxide dismutase 2, mitochondrial [Source:MGI Symbol;Acc:MGI:98352]	GO:0034021	response to silicon dioxide
Sod2	superoxide dismutase 2, mitochondrial [Source:MGI Symbol;Acc:MGI:98352]	GO:0035900	response to isolation stress
Sod2	superoxide dismutase 2, mitochondrial [Source:MGI Symbol;Acc:MGI:98352]	GO:0035902	response to immobilization stress
Sod2	superoxide dismutase 2, mitochondrial [Source:MGI Symbol;Acc:MGI:98352]	GO:0043524	negative regulation of neuron apoptotic process
Sod2	superoxide dismutase 2, mitochondrial [Source:MGI Symbol;Acc:MGI:98352]	GO:0046686	response to cadmium ion
Sod2	superoxide dismutase 2, mitochondrial [Source:MGI Symbol;Acc:MGI:98352]	GO:0051289	protein homotetramerization
Sod2	superoxide dismutase 2, mitochondrial [Source:MGI Symbol;Acc:MGI:98352]	GO:0051602	response to electrical stimulus
Sod2	superoxide dismutase 2, mitochondrial [Source:MGI Symbol;Acc:MGI:98352]	GO:0071000	response to magnetism
Sod2	superoxide dismutase 2, mitochondrial [Source:MGI Symbol;Acc:MGI:98352]	GO:0071361	cellular response to ethanol
Sod2	superoxide dismutase 2, mitochondrial [Source:MGI Symbol;Acc:MGI:98352]	GO:1902176	negative regulation of oxidative stress-induced intrinsic apoptotic signaling pathway
Sod2	superoxide dismutase 2, mitochondrial [Source:MGI Symbol;Acc:MGI:98352]	GO:1902631	negative regulation of membrane hyperpolarization
Sod2	superoxide dismutase 2, mitochondrial [Source:MGI Symbol;Acc:MGI:98352]	GO:1904706	negative regulation of vascular associated smooth muscle cell proliferation
Sod2	superoxide dismutase 2, mitochondrial [Source:MGI Symbol;Acc:MGI:98352]	GO:1905461	positive regulation of vascular associated smooth muscle cell apoptotic process
Sod2	superoxide dismutase 2, mitochondrial [Source:MGI Symbol;Acc:MGI:98352]	GO:1905932	positive regulation of vascular associated smooth muscle cell differentiation involved in phenotypic switching
Sod2	superoxide dismutase 2, mitochondrial [Source:MGI Symbol;Acc:MGI:98352]	GO:0042645	mitochondrial nucleoid
Sod2	superoxide dismutase 2, mitochondrial [Source:MGI Symbol;Acc:MGI:98352]
Itgb8	integrin beta 8 [Source:MGI Symbol;Acc:MGI:1338035]	GO:0007179	transforming growth factor beta receptor signaling pathway
Itgb8	integrin beta 8 [Source:MGI Symbol;Acc:MGI:1338035]	GO:0009615	response to virus
Itgb8	integrin beta 8 [Source:MGI Symbol;Acc:MGI:1338035]	GO:0046872	metal ion binding
Itgb8	integrin beta 8 [Source:MGI Symbol;Acc:MGI:1338035]	GO:0005886	plasma membrane
Itgb8	integrin beta 8 [Source:MGI Symbol;Acc:MGI:1338035]	GO:0009986	cell surface
Itgb8	integrin beta 8 [Source:MGI Symbol;Acc:MGI:1338035]	GO:0007155	cell adhesion
Itgb8	integrin beta 8 [Source:MGI Symbol;Acc:MGI:1338035]	GO:0098609	cell-cell adhesion
Itgb8	integrin beta 8 [Source:MGI Symbol;Acc:MGI:1338035]	GO:0007229	integrin-mediated signaling pathway
Itgb8	integrin beta 8 [Source:MGI Symbol;Acc:MGI:1338035]	GO:0005178	integrin binding
Itgb8	integrin beta 8 [Source:MGI Symbol;Acc:MGI:1338035]	GO:0005925	focal adhesion
Itgb8	integrin beta 8 [Source:MGI Symbol;Acc:MGI:1338035]	GO:0008305	integrin complex
Itgb8	integrin beta 8 [Source:MGI Symbol;Acc:MGI:1338035]	GO:0005102	signaling receptor binding
Itgb8	integrin beta 8 [Source:MGI Symbol;Acc:MGI:1338035]	GO:0007160	cell-matrix adhesion
Itgb8	integrin beta 8 [Source:MGI Symbol;Acc:MGI:1338035]	GO:0060022	hard palate development
Itgb8	integrin beta 8 [Source:MGI Symbol;Acc:MGI:1338035]	GO:0001573	ganglioside metabolic process
Itgb8	integrin beta 8 [Source:MGI Symbol;Acc:MGI:1338035]	GO:0061520	Langerhans cell differentiation
Itgb8	integrin beta 8 [Source:MGI Symbol;Acc:MGI:1338035]	GO:0006955	immune response
Itgb8	integrin beta 8 [Source:MGI Symbol;Acc:MGI:1338035]	GO:0001570	vasculogenesis
Itgb8	integrin beta 8 [Source:MGI Symbol;Acc:MGI:1338035]	GO:0034686	integrin alphav-beta8 complex
Itgb8	integrin beta 8 [Source:MGI Symbol;Acc:MGI:1338035]	GO:1990430	extracellular matrix protein binding
Itgb8	integrin beta 8 [Source:MGI Symbol;Acc:MGI:1338035]	GO:0010628	positive regulation of gene expression
Itgb8	integrin beta 8 [Source:MGI Symbol;Acc:MGI:1338035]	GO:0010629	negative regulation of gene expression
Itgb8	integrin beta 8 [Source:MGI Symbol;Acc:MGI:1338035]	GO:0045766	positive regulation of angiogenesis
Itgb8	integrin beta 8 [Source:MGI Symbol;Acc:MGI:1338035]	GO:0051216	cartilage development
Itgb8	integrin beta 8 [Source:MGI Symbol;Acc:MGI:1338035]
Kcng3	potassium voltage-gated channel, subfamily G, member 3 [Source:MGI Symbol;Acc:MGI:2663923]	GO:0005515	protein binding
Kcng3	potassium voltage-gated channel, subfamily G, member 3 [Source:MGI Symbol;Acc:MGI:2663923]	GO:0016020	membrane
Kcng3	potassium voltage-gated channel, subfamily G, member 3 [Source:MGI Symbol;Acc:MGI:2663923]	GO:0055085	transmembrane transport
Kcng3	potassium voltage-gated channel, subfamily G, member 3 [Source:MGI Symbol;Acc:MGI:2663923]	GO:0005249	voltage-gated potassium channel activity
Kcng3	potassium voltage-gated channel, subfamily G, member 3 [Source:MGI Symbol;Acc:MGI:2663923]	GO:0006811	monoatomic ion transport
Kcng3	potassium voltage-gated channel, subfamily G, member 3 [Source:MGI Symbol;Acc:MGI:2663923]	GO:0006813	potassium ion transport
Kcng3	potassium voltage-gated channel, subfamily G, member 3 [Source:MGI Symbol;Acc:MGI:2663923]	GO:0051260	protein homooligomerization
Kcng3	potassium voltage-gated channel, subfamily G, member 3 [Source:MGI Symbol;Acc:MGI:2663923]	GO:0008076	voltage-gated potassium channel complex
Kcng3	potassium voltage-gated channel, subfamily G, member 3 [Source:MGI Symbol;Acc:MGI:2663923]	GO:0005216	monoatomic ion channel activity
Kcng3	potassium voltage-gated channel, subfamily G, member 3 [Source:MGI Symbol;Acc:MGI:2663923]	GO:0005737	cytoplasm
Kcng3	potassium voltage-gated channel, subfamily G, member 3 [Source:MGI Symbol;Acc:MGI:2663923]	GO:0005886	plasma membrane
Kcng3	potassium voltage-gated channel, subfamily G, member 3 [Source:MGI Symbol;Acc:MGI:2663923]	GO:0034702	monoatomic ion channel complex
Kcng3	potassium voltage-gated channel, subfamily G, member 3 [Source:MGI Symbol;Acc:MGI:2663923]	GO:0005267	potassium channel activity
Kcng3	potassium voltage-gated channel, subfamily G, member 3 [Source:MGI Symbol;Acc:MGI:2663923]	GO:0071805	potassium ion transmembrane transport
Kcng3	potassium voltage-gated channel, subfamily G, member 3 [Source:MGI Symbol;Acc:MGI:2663923]	GO:0015459	potassium channel regulator activity
Kcng3	potassium voltage-gated channel, subfamily G, member 3 [Source:MGI Symbol;Acc:MGI:2663923]	GO:0005251	delayed rectifier potassium channel activity
Kcng3	potassium voltage-gated channel, subfamily G, member 3 [Source:MGI Symbol;Acc:MGI:2663923]	GO:0001508	action potential
Kcng3	potassium voltage-gated channel, subfamily G, member 3 [Source:MGI Symbol;Acc:MGI:2663923]	GO:1901379	regulation of potassium ion transmembrane transport
Kcng3	potassium voltage-gated channel, subfamily G, member 3 [Source:MGI Symbol;Acc:MGI:2663923]	GO:0043266	regulation of potassium ion transport
Kcng3	potassium voltage-gated channel, subfamily G, member 3 [Source:MGI Symbol;Acc:MGI:2663923]	GO:0005783	endoplasmic reticulum
Hrk	harakiri, BCL2 interacting protein (contains only BH3 domain) [Source:MGI Symbol;Acc:MGI:1201608]
Hrk	harakiri, BCL2 interacting protein (contains only BH3 domain) [Source:MGI Symbol;Acc:MGI:1201608]	GO:0042981	regulation of apoptotic process
Hrk	harakiri, BCL2 interacting protein (contains only BH3 domain) [Source:MGI Symbol;Acc:MGI:1201608]	GO:0016020	membrane
Hrk	harakiri, BCL2 interacting protein (contains only BH3 domain) [Source:MGI Symbol;Acc:MGI:1201608]	GO:0005739	mitochondrion
Hrk	harakiri, BCL2 interacting protein (contains only BH3 domain) [Source:MGI Symbol;Acc:MGI:1201608]	GO:0043525	positive regulation of neuron apoptotic process
Hrk	harakiri, BCL2 interacting protein (contains only BH3 domain) [Source:MGI Symbol;Acc:MGI:1201608]	GO:0006915	apoptotic process
Hrk	harakiri, BCL2 interacting protein (contains only BH3 domain) [Source:MGI Symbol;Acc:MGI:1201608]	GO:0043065	positive regulation of apoptotic process
Hrk	harakiri, BCL2 interacting protein (contains only BH3 domain) [Source:MGI Symbol;Acc:MGI:1201608]	GO:0051365	cellular response to potassium ion starvation
Hrk	harakiri, BCL2 interacting protein (contains only BH3 domain) [Source:MGI Symbol;Acc:MGI:1201608]	GO:0031334	positive regulation of protein-containing complex assembly
Hrk	harakiri, BCL2 interacting protein (contains only BH3 domain) [Source:MGI Symbol;Acc:MGI:1201608]	GO:0090200	positive regulation of release of cytochrome c from mitochondria
Pcdhga11	protocadherin gamma subfamily A, 11 [Source:MGI Symbol;Acc:MGI:1935228]	GO:0016020	membrane
Pcdhga11	protocadherin gamma subfamily A, 11 [Source:MGI Symbol;Acc:MGI:1935228]	GO:0005509	calcium ion binding
Pcdhga11	protocadherin gamma subfamily A, 11 [Source:MGI Symbol;Acc:MGI:1935228]	GO:0007156	homophilic cell adhesion via plasma membrane adhesion molecules
Pcdhga11	protocadherin gamma subfamily A, 11 [Source:MGI Symbol;Acc:MGI:1935228]	GO:0007155	cell adhesion
Pcdhga11	protocadherin gamma subfamily A, 11 [Source:MGI Symbol;Acc:MGI:1935228]	GO:0005886	plasma membrane
Pcdhga11	protocadherin gamma subfamily A, 11 [Source:MGI Symbol;Acc:MGI:1935228]	GO:0003674	molecular_function
