# Supplementary material for: Unraveling the brain expression of BDNF in a mouse model of Anorexia Nervosa
Source: Research Square preprint supplement (doi:10.21203/rs.3.rs-6260210/v1), 2025-04-16
Supplement: Supplementary file 5 [file 765f166bda8047edcb779019.xlsx]

## Sheet: Supplementary Table 4
Supplementary Table 4. Functional Annotation of Differentially Expressed Genes in the dorsal striatum from Table 2
external_gene_name	description	go_id	name_1006
Mme	membrane metallo endopeptidase [Source:MGI Symbol;Acc:MGI:97004]	GO:0006508	proteolysis
Mme	membrane metallo endopeptidase [Source:MGI Symbol;Acc:MGI:97004]	GO:0008237	metallopeptidase activity
Mme	membrane metallo endopeptidase [Source:MGI Symbol;Acc:MGI:97004]	GO:0004222	metalloendopeptidase activity
Mme	membrane metallo endopeptidase [Source:MGI Symbol;Acc:MGI:97004]	GO:0016020	membrane
Mme	membrane metallo endopeptidase [Source:MGI Symbol;Acc:MGI:97004]	GO:0045202	synapse
Mme	membrane metallo endopeptidase [Source:MGI Symbol;Acc:MGI:97004]	GO:0043627	response to estrogen
Mme	membrane metallo endopeptidase [Source:MGI Symbol;Acc:MGI:97004]	GO:0030424	axon
Mme	membrane metallo endopeptidase [Source:MGI Symbol;Acc:MGI:97004]	GO:0005737	cytoplasm
Mme	membrane metallo endopeptidase [Source:MGI Symbol;Acc:MGI:97004]	GO:0046872	metal ion binding
Mme	membrane metallo endopeptidase [Source:MGI Symbol;Acc:MGI:97004]	GO:0005886	plasma membrane
Mme	membrane metallo endopeptidase [Source:MGI Symbol;Acc:MGI:97004]	GO:0008270	zinc ion binding
Mme	membrane metallo endopeptidase [Source:MGI Symbol;Acc:MGI:97004]	GO:0016485	protein processing
Mme	membrane metallo endopeptidase [Source:MGI Symbol;Acc:MGI:97004]	GO:0030425	dendrite
Mme	membrane metallo endopeptidase [Source:MGI Symbol;Acc:MGI:97004]	GO:0042277	peptide binding
Mme	membrane metallo endopeptidase [Source:MGI Symbol;Acc:MGI:97004]	GO:0030163	protein catabolic process
Mme	membrane metallo endopeptidase [Source:MGI Symbol;Acc:MGI:97004]	GO:0008021	synaptic vesicle
Mme	membrane metallo endopeptidase [Source:MGI Symbol;Acc:MGI:97004]	GO:0097242	amyloid-beta clearance
Mme	membrane metallo endopeptidase [Source:MGI Symbol;Acc:MGI:97004]	GO:0071345	cellular response to cytokine stimulus
Mme	membrane metallo endopeptidase [Source:MGI Symbol;Acc:MGI:97004]	GO:0008233	peptidase activity
Mme	membrane metallo endopeptidase [Source:MGI Symbol;Acc:MGI:97004]	GO:0001822	kidney development
Mme	membrane metallo endopeptidase [Source:MGI Symbol;Acc:MGI:97004]	GO:0044306	neuron projection terminus
Mme	membrane metallo endopeptidase [Source:MGI Symbol;Acc:MGI:97004]	GO:0050435	amyloid-beta metabolic process
Mme	membrane metallo endopeptidase [Source:MGI Symbol;Acc:MGI:97004]	GO:0005903	brush border
Mme	membrane metallo endopeptidase [Source:MGI Symbol;Acc:MGI:97004]	GO:0071493	cellular response to UV-B
Mme	membrane metallo endopeptidase [Source:MGI Symbol;Acc:MGI:97004]	GO:0019233	sensory perception of pain
Mme	membrane metallo endopeptidase [Source:MGI Symbol;Acc:MGI:97004]	GO:1900273	positive regulation of long-term synaptic potentiation
Mme	membrane metallo endopeptidase [Source:MGI Symbol;Acc:MGI:97004]	GO:0006518	peptide metabolic process
Mme	membrane metallo endopeptidase [Source:MGI Symbol;Acc:MGI:97004]	GO:0010814	substance P catabolic process
Mme	membrane metallo endopeptidase [Source:MGI Symbol;Acc:MGI:97004]	GO:0010815	bradykinin catabolic process
Mme	membrane metallo endopeptidase [Source:MGI Symbol;Acc:MGI:97004]	GO:0042447	hormone catabolic process
Mme	membrane metallo endopeptidase [Source:MGI Symbol;Acc:MGI:97004]	GO:0071492	cellular response to UV-A
Mme	membrane metallo endopeptidase [Source:MGI Symbol;Acc:MGI:97004]	GO:0070012	oligopeptidase activity
Mme	membrane metallo endopeptidase [Source:MGI Symbol;Acc:MGI:97004]	GO:0090399	replicative senescence
Mme	membrane metallo endopeptidase [Source:MGI Symbol;Acc:MGI:97004]	GO:0046449	creatinine metabolic process
Mme	membrane metallo endopeptidase [Source:MGI Symbol;Acc:MGI:97004]	GO:0150094	amyloid-beta clearance by cellular catabolic process
Mme	membrane metallo endopeptidase [Source:MGI Symbol;Acc:MGI:97004]	GO:0001786	phosphatidylserine binding
Mme	membrane metallo endopeptidase [Source:MGI Symbol;Acc:MGI:97004]	GO:0004175	endopeptidase activity
Mme	membrane metallo endopeptidase [Source:MGI Symbol;Acc:MGI:97004]	GO:0008238	exopeptidase activity
Mme	membrane metallo endopeptidase [Source:MGI Symbol;Acc:MGI:97004]	GO:0042803	protein homodimerization activity
Mme	membrane metallo endopeptidase [Source:MGI Symbol;Acc:MGI:97004]	GO:1901612	cardiolipin binding
Mme	membrane metallo endopeptidase [Source:MGI Symbol;Acc:MGI:97004]	GO:0001890	placenta development
Mme	membrane metallo endopeptidase [Source:MGI Symbol;Acc:MGI:97004]	GO:0007611	learning or memory
Mme	membrane metallo endopeptidase [Source:MGI Symbol;Acc:MGI:97004]	GO:0030324	lung development
Mme	membrane metallo endopeptidase [Source:MGI Symbol;Acc:MGI:97004]	GO:0050769	positive regulation of neurogenesis
Mme	membrane metallo endopeptidase [Source:MGI Symbol;Acc:MGI:97004]	GO:0061837	neuropeptide processing
Mme	membrane metallo endopeptidase [Source:MGI Symbol;Acc:MGI:97004]	GO:0005769	early endosome
Mme	membrane metallo endopeptidase [Source:MGI Symbol;Acc:MGI:97004]	GO:0005802	trans-Golgi network
Mme	membrane metallo endopeptidase [Source:MGI Symbol;Acc:MGI:97004]	GO:0031410	cytoplasmic vesicle
Mme	membrane metallo endopeptidase [Source:MGI Symbol;Acc:MGI:97004]	GO:0043025	neuronal cell body
Mme	membrane metallo endopeptidase [Source:MGI Symbol;Acc:MGI:97004]	GO:0045121	membrane raft
Mme	membrane metallo endopeptidase [Source:MGI Symbol;Acc:MGI:97004]	GO:0098793	presynapse
Mme	membrane metallo endopeptidase [Source:MGI Symbol;Acc:MGI:97004]
Atp7a	ATPase, Cu++ transporting, alpha polypeptide [Source:MGI Symbol;Acc:MGI:99400]	GO:0046872	metal ion binding
Atp7a	ATPase, Cu++ transporting, alpha polypeptide [Source:MGI Symbol;Acc:MGI:99400]	GO:0005524	ATP binding
Atp7a	ATPase, Cu++ transporting, alpha polypeptide [Source:MGI Symbol;Acc:MGI:99400]	GO:0016020	membrane
Atp7a	ATPase, Cu++ transporting, alpha polypeptide [Source:MGI Symbol;Acc:MGI:99400]	GO:0005507	copper ion binding
Atp7a	ATPase, Cu++ transporting, alpha polypeptide [Source:MGI Symbol;Acc:MGI:99400]	GO:0000166	nucleotide binding
Atp7a	ATPase, Cu++ transporting, alpha polypeptide [Source:MGI Symbol;Acc:MGI:99400]	GO:0016887	ATP hydrolysis activity
Atp7a	ATPase, Cu++ transporting, alpha polypeptide [Source:MGI Symbol;Acc:MGI:99400]	GO:0005215	transporter activity
Atp7a	ATPase, Cu++ transporting, alpha polypeptide [Source:MGI Symbol;Acc:MGI:99400]	GO:0006812	monoatomic cation transport
Atp7a	ATPase, Cu++ transporting, alpha polypeptide [Source:MGI Symbol;Acc:MGI:99400]	GO:0019829	ATPase-coupled monoatomic cation transmembrane transporter activity
Atp7a	ATPase, Cu++ transporting, alpha polypeptide [Source:MGI Symbol;Acc:MGI:99400]	GO:0005794	Golgi apparatus
Atp7a	ATPase, Cu++ transporting, alpha polypeptide [Source:MGI Symbol;Acc:MGI:99400]	GO:0005802	trans-Golgi network
Atp7a	ATPase, Cu++ transporting, alpha polypeptide [Source:MGI Symbol;Acc:MGI:99400]	GO:0031267	small GTPase binding
Atp7a	ATPase, Cu++ transporting, alpha polypeptide [Source:MGI Symbol;Acc:MGI:99400]	GO:0032767	copper-dependent protein binding
Atp7a	ATPase, Cu++ transporting, alpha polypeptide [Source:MGI Symbol;Acc:MGI:99400]	GO:0051087	protein-folding chaperone binding
Atp7a	ATPase, Cu++ transporting, alpha polypeptide [Source:MGI Symbol;Acc:MGI:99400]	GO:0140581	P-type monovalent copper transporter activity
Atp7a	ATPase, Cu++ transporting, alpha polypeptide [Source:MGI Symbol;Acc:MGI:99400]	GO:1903136	cuprous ion binding
Atp7a	ATPase, Cu++ transporting, alpha polypeptide [Source:MGI Symbol;Acc:MGI:99400]	GO:0001701	in utero embryonic development
Atp7a	ATPase, Cu++ transporting, alpha polypeptide [Source:MGI Symbol;Acc:MGI:99400]	GO:0001889	liver development
Atp7a	ATPase, Cu++ transporting, alpha polypeptide [Source:MGI Symbol;Acc:MGI:99400]	GO:0006825	copper ion transport
Atp7a	ATPase, Cu++ transporting, alpha polypeptide [Source:MGI Symbol;Acc:MGI:99400]	GO:0006878	intracellular copper ion homeostasis
Atp7a	ATPase, Cu++ transporting, alpha polypeptide [Source:MGI Symbol;Acc:MGI:99400]	GO:0007565	female pregnancy
Atp7a	ATPase, Cu++ transporting, alpha polypeptide [Source:MGI Symbol;Acc:MGI:99400]	GO:0007595	lactation
Atp7a	ATPase, Cu++ transporting, alpha polypeptide [Source:MGI Symbol;Acc:MGI:99400]	GO:0010041	response to iron(III) ion
Atp7a	ATPase, Cu++ transporting, alpha polypeptide [Source:MGI Symbol;Acc:MGI:99400]	GO:0010042	response to manganese ion
Atp7a	ATPase, Cu++ transporting, alpha polypeptide [Source:MGI Symbol;Acc:MGI:99400]	GO:0010043	response to zinc ion
Atp7a	ATPase, Cu++ transporting, alpha polypeptide [Source:MGI Symbol;Acc:MGI:99400]	GO:0010288	response to lead ion
Atp7a	ATPase, Cu++ transporting, alpha polypeptide [Source:MGI Symbol;Acc:MGI:99400]	GO:0010592	positive regulation of lamellipodium assembly
Atp7a	ATPase, Cu++ transporting, alpha polypeptide [Source:MGI Symbol;Acc:MGI:99400]	GO:0034760	negative regulation of iron ion transmembrane transport
Atp7a	ATPase, Cu++ transporting, alpha polypeptide [Source:MGI Symbol;Acc:MGI:99400]	GO:0035434	copper ion transmembrane transport
Atp7a	ATPase, Cu++ transporting, alpha polypeptide [Source:MGI Symbol;Acc:MGI:99400]	GO:0036120	cellular response to platelet-derived growth factor stimulus
Atp7a	ATPase, Cu++ transporting, alpha polypeptide [Source:MGI Symbol;Acc:MGI:99400]	GO:0045793	positive regulation of cell size
Atp7a	ATPase, Cu++ transporting, alpha polypeptide [Source:MGI Symbol;Acc:MGI:99400]	GO:0046688	response to copper ion
Atp7a	ATPase, Cu++ transporting, alpha polypeptide [Source:MGI Symbol;Acc:MGI:99400]	GO:0048023	positive regulation of melanin biosynthetic process
Atp7a	ATPase, Cu++ transporting, alpha polypeptide [Source:MGI Symbol;Acc:MGI:99400]	GO:0050679	positive regulation of epithelial cell proliferation
Atp7a	ATPase, Cu++ transporting, alpha polypeptide [Source:MGI Symbol;Acc:MGI:99400]	GO:0060003	copper ion export
Atp7a	ATPase, Cu++ transporting, alpha polypeptide [Source:MGI Symbol;Acc:MGI:99400]	GO:0071230	cellular response to amino acid stimulus
Atp7a	ATPase, Cu++ transporting, alpha polypeptide [Source:MGI Symbol;Acc:MGI:99400]	GO:0071236	cellular response to antibiotic
Atp7a	ATPase, Cu++ transporting, alpha polypeptide [Source:MGI Symbol;Acc:MGI:99400]	GO:0071276	cellular response to cadmium ion
Atp7a	ATPase, Cu++ transporting, alpha polypeptide [Source:MGI Symbol;Acc:MGI:99400]	GO:0071279	cellular response to cobalt ion
Atp7a	ATPase, Cu++ transporting, alpha polypeptide [Source:MGI Symbol;Acc:MGI:99400]	GO:0071280	cellular response to copper ion
Atp7a	ATPase, Cu++ transporting, alpha polypeptide [Source:MGI Symbol;Acc:MGI:99400]	GO:0071281	cellular response to iron ion
Atp7a	ATPase, Cu++ transporting, alpha polypeptide [Source:MGI Symbol;Acc:MGI:99400]	GO:0071284	cellular response to lead ion
Atp7a	ATPase, Cu++ transporting, alpha polypeptide [Source:MGI Symbol;Acc:MGI:99400]	GO:0071456	cellular response to hypoxia
Atp7a	ATPase, Cu++ transporting, alpha polypeptide [Source:MGI Symbol;Acc:MGI:99400]	GO:1903036	positive regulation of response to wounding
Atp7a	ATPase, Cu++ transporting, alpha polypeptide [Source:MGI Symbol;Acc:MGI:99400]	GO:1904754	positive regulation of vascular associated smooth muscle cell migration
Atp7a	ATPase, Cu++ transporting, alpha polypeptide [Source:MGI Symbol;Acc:MGI:99400]	GO:0005770	late endosome
Atp7a	ATPase, Cu++ transporting, alpha polypeptide [Source:MGI Symbol;Acc:MGI:99400]	GO:0005886	plasma membrane
Atp7a	ATPase, Cu++ transporting, alpha polypeptide [Source:MGI Symbol;Acc:MGI:99400]	GO:0005902	microvillus
Atp7a	ATPase, Cu++ transporting, alpha polypeptide [Source:MGI Symbol;Acc:MGI:99400]	GO:0016323	basolateral plasma membrane
Atp7a	ATPase, Cu++ transporting, alpha polypeptide [Source:MGI Symbol;Acc:MGI:99400]	GO:0016324	apical plasma membrane
Atp7a	ATPase, Cu++ transporting, alpha polypeptide [Source:MGI Symbol;Acc:MGI:99400]	GO:0030140	trans-Golgi network transport vesicle
Atp7a	ATPase, Cu++ transporting, alpha polypeptide [Source:MGI Symbol;Acc:MGI:99400]	GO:0030141	secretory granule
Atp7a	ATPase, Cu++ transporting, alpha polypeptide [Source:MGI Symbol;Acc:MGI:99400]	GO:0030424	axon
Atp7a	ATPase, Cu++ transporting, alpha polypeptide [Source:MGI Symbol;Acc:MGI:99400]	GO:0030425	dendrite
Atp7a	ATPase, Cu++ transporting, alpha polypeptide [Source:MGI Symbol;Acc:MGI:99400]	GO:0031252	cell leading edge
Atp7a	ATPase, Cu++ transporting, alpha polypeptide [Source:MGI Symbol;Acc:MGI:99400]	GO:0031526	brush border membrane
Atp7a	ATPase, Cu++ transporting, alpha polypeptide [Source:MGI Symbol;Acc:MGI:99400]	GO:0032588	trans-Golgi network membrane
Atp7a	ATPase, Cu++ transporting, alpha polypeptide [Source:MGI Symbol;Acc:MGI:99400]	GO:0043204	perikaryon
Atp7a	ATPase, Cu++ transporting, alpha polypeptide [Source:MGI Symbol;Acc:MGI:99400]	GO:0048471	perinuclear region of cytoplasm
Atp7a	ATPase, Cu++ transporting, alpha polypeptide [Source:MGI Symbol;Acc:MGI:99400]	GO:0005515	protein binding
Atp7a	ATPase, Cu++ transporting, alpha polypeptide [Source:MGI Symbol;Acc:MGI:99400]	GO:0007005	mitochondrion organization
Atp7a	ATPase, Cu++ transporting, alpha polypeptide [Source:MGI Symbol;Acc:MGI:99400]	GO:0010468	regulation of gene expression
Atp7a	ATPase, Cu++ transporting, alpha polypeptide [Source:MGI Symbol;Acc:MGI:99400]	GO:0043524	negative regulation of neuron apoptotic process
Atp7a	ATPase, Cu++ transporting, alpha polypeptide [Source:MGI Symbol;Acc:MGI:99400]	GO:0051402	neuron apoptotic process
Atp7a	ATPase, Cu++ transporting, alpha polypeptide [Source:MGI Symbol;Acc:MGI:99400]	GO:0051216	cartilage development
Atp7a	ATPase, Cu++ transporting, alpha polypeptide [Source:MGI Symbol;Acc:MGI:99400]	GO:0048286	lung alveolus development
Atp7a	ATPase, Cu++ transporting, alpha polypeptide [Source:MGI Symbol;Acc:MGI:99400]	GO:0007626	locomotory behavior
Atp7a	ATPase, Cu++ transporting, alpha polypeptide [Source:MGI Symbol;Acc:MGI:99400]	GO:0043588	skin development
Atp7a	ATPase, Cu++ transporting, alpha polypeptide [Source:MGI Symbol;Acc:MGI:99400]	GO:0042995	cell projection
Atp7a	ATPase, Cu++ transporting, alpha polypeptide [Source:MGI Symbol;Acc:MGI:99400]	GO:0005768	endosome
Atp7a	ATPase, Cu++ transporting, alpha polypeptide [Source:MGI Symbol;Acc:MGI:99400]	GO:0045202	synapse
Atp7a	ATPase, Cu++ transporting, alpha polypeptide [Source:MGI Symbol;Acc:MGI:99400]	GO:0043025	neuronal cell body
Atp7a	ATPase, Cu++ transporting, alpha polypeptide [Source:MGI Symbol;Acc:MGI:99400]	GO:0051649	establishment of localization in cell
Atp7a	ATPase, Cu++ transporting, alpha polypeptide [Source:MGI Symbol;Acc:MGI:99400]	GO:0014069	postsynaptic density
Atp7a	ATPase, Cu++ transporting, alpha polypeptide [Source:MGI Symbol;Acc:MGI:99400]	GO:0031901	early endosome membrane
Atp7a	ATPase, Cu++ transporting, alpha polypeptide [Source:MGI Symbol;Acc:MGI:99400]	GO:0033162	melanosome membrane
Atp7a	ATPase, Cu++ transporting, alpha polypeptide [Source:MGI Symbol;Acc:MGI:99400]	GO:0048813	dendrite morphogenesis
Atp7a	ATPase, Cu++ transporting, alpha polypeptide [Source:MGI Symbol;Acc:MGI:99400]	GO:0042417	dopamine metabolic process
Atp7a	ATPase, Cu++ transporting, alpha polypeptide [Source:MGI Symbol;Acc:MGI:99400]	GO:0030198	extracellular matrix organization
Atp7a	ATPase, Cu++ transporting, alpha polypeptide [Source:MGI Symbol;Acc:MGI:99400]	GO:0048812	neuron projection morphogenesis
Atp7a	ATPase, Cu++ transporting, alpha polypeptide [Source:MGI Symbol;Acc:MGI:99400]	GO:0030199	collagen fibril organization
Atp7a	ATPase, Cu++ transporting, alpha polypeptide [Source:MGI Symbol;Acc:MGI:99400]	GO:0001568	blood vessel development
Atp7a	ATPase, Cu++ transporting, alpha polypeptide [Source:MGI Symbol;Acc:MGI:99400]	GO:0031410	cytoplasmic vesicle
Atp7a	ATPase, Cu++ transporting, alpha polypeptide [Source:MGI Symbol;Acc:MGI:99400]	GO:0043005	neuron projection
Atp7a	ATPase, Cu++ transporting, alpha polypeptide [Source:MGI Symbol;Acc:MGI:99400]	GO:0043473	pigmentation
Atp7a	ATPase, Cu++ transporting, alpha polypeptide [Source:MGI Symbol;Acc:MGI:99400]	GO:0001974	blood vessel remodeling
Atp7a	ATPase, Cu++ transporting, alpha polypeptide [Source:MGI Symbol;Acc:MGI:99400]	GO:0046034	ATP metabolic process
Atp7a	ATPase, Cu++ transporting, alpha polypeptide [Source:MGI Symbol;Acc:MGI:99400]	GO:0021702	cerebellar Purkinje cell differentiation
Atp7a	ATPase, Cu++ transporting, alpha polypeptide [Source:MGI Symbol;Acc:MGI:99400]	GO:0001836	release of cytochrome c from mitochondria
Atp7a	ATPase, Cu++ transporting, alpha polypeptide [Source:MGI Symbol;Acc:MGI:99400]	GO:0021954	central nervous system neuron development
Atp7a	ATPase, Cu++ transporting, alpha polypeptide [Source:MGI Symbol;Acc:MGI:99400]	GO:0042421	norepinephrine biosynthetic process
Atp7a	ATPase, Cu++ transporting, alpha polypeptide [Source:MGI Symbol;Acc:MGI:99400]	GO:0070050	neuron cellular homeostasis
Atp7a	ATPase, Cu++ transporting, alpha polypeptide [Source:MGI Symbol;Acc:MGI:99400]	GO:0031069	hair follicle morphogenesis
Atp7a	ATPase, Cu++ transporting, alpha polypeptide [Source:MGI Symbol;Acc:MGI:99400]	GO:0006584	catecholamine metabolic process
Atp7a	ATPase, Cu++ transporting, alpha polypeptide [Source:MGI Symbol;Acc:MGI:99400]	GO:0042415	norepinephrine metabolic process
Atp7a	ATPase, Cu++ transporting, alpha polypeptide [Source:MGI Symbol;Acc:MGI:99400]	GO:0021860	pyramidal neuron development
Atp7a	ATPase, Cu++ transporting, alpha polypeptide [Source:MGI Symbol;Acc:MGI:99400]	GO:0002082	regulation of oxidative phosphorylation
Atp7a	ATPase, Cu++ transporting, alpha polypeptide [Source:MGI Symbol;Acc:MGI:99400]	GO:0010273	detoxification of copper ion
Atp7a	ATPase, Cu++ transporting, alpha polypeptide [Source:MGI Symbol;Acc:MGI:99400]	GO:0048251	elastic fiber assembly
Atp7a	ATPase, Cu++ transporting, alpha polypeptide [Source:MGI Symbol;Acc:MGI:99400]	GO:0019430	removal of superoxide radicals
Atp7a	ATPase, Cu++ transporting, alpha polypeptide [Source:MGI Symbol;Acc:MGI:99400]	GO:0042428	serotonin metabolic process
Atp7a	ATPase, Cu++ transporting, alpha polypeptide [Source:MGI Symbol;Acc:MGI:99400]	GO:0006568	tryptophan metabolic process
Atp7a	ATPase, Cu++ transporting, alpha polypeptide [Source:MGI Symbol;Acc:MGI:99400]	GO:0005375	copper ion transmembrane transporter activity
Atp7a	ATPase, Cu++ transporting, alpha polypeptide [Source:MGI Symbol;Acc:MGI:99400]	GO:0006570	tyrosine metabolic process
Atp7a	ATPase, Cu++ transporting, alpha polypeptide [Source:MGI Symbol;Acc:MGI:99400]	GO:0015677	copper ion import
Atp7a	ATPase, Cu++ transporting, alpha polypeptide [Source:MGI Symbol;Acc:MGI:99400]	GO:0042093	T-helper cell differentiation
Atp7a	ATPase, Cu++ transporting, alpha polypeptide [Source:MGI Symbol;Acc:MGI:99400]	GO:0042414	epinephrine metabolic process
Atp7a	ATPase, Cu++ transporting, alpha polypeptide [Source:MGI Symbol;Acc:MGI:99400]	GO:0045914	negative regulation of catecholamine metabolic process
Atp7a	ATPase, Cu++ transporting, alpha polypeptide [Source:MGI Symbol;Acc:MGI:99400]	GO:0051542	elastin biosynthetic process
Atp7a	ATPase, Cu++ transporting, alpha polypeptide [Source:MGI Symbol;Acc:MGI:99400]	GO:0016532	superoxide dismutase copper chaperone activity
Atp7a	ATPase, Cu++ transporting, alpha polypeptide [Source:MGI Symbol;Acc:MGI:99400]	GO:0043682	P-type divalent copper transporter activity
Atp7a	ATPase, Cu++ transporting, alpha polypeptide [Source:MGI Symbol;Acc:MGI:99400]	GO:0032773	positive regulation of tyrosinase activity
Atp7a	ATPase, Cu++ transporting, alpha polypeptide [Source:MGI Symbol;Acc:MGI:99400]	GO:0055070	copper ion homeostasis
Atp7a	ATPase, Cu++ transporting, alpha polypeptide [Source:MGI Symbol;Acc:MGI:99400]
Fgf22	fibroblast growth factor 22 [Source:MGI Symbol;Acc:MGI:1914362]	GO:0008083	growth factor activity
Fgf22	fibroblast growth factor 22 [Source:MGI Symbol;Acc:MGI:1914362]	GO:0007165	signal transduction
Fgf22	fibroblast growth factor 22 [Source:MGI Symbol;Acc:MGI:1914362]	GO:0005730	nucleolus
Fgf22	fibroblast growth factor 22 [Source:MGI Symbol;Acc:MGI:1914362]	GO:0005515	protein binding
Fgf22	fibroblast growth factor 22 [Source:MGI Symbol;Acc:MGI:1914362]	GO:0098978	glutamatergic synapse
Fgf22	fibroblast growth factor 22 [Source:MGI Symbol;Acc:MGI:1914362]	GO:0005737	cytoplasm
Fgf22	fibroblast growth factor 22 [Source:MGI Symbol;Acc:MGI:1914362]	GO:0009986	cell surface
Fgf22	fibroblast growth factor 22 [Source:MGI Symbol;Acc:MGI:1914362]	GO:0030154	cell differentiation
Fgf22	fibroblast growth factor 22 [Source:MGI Symbol;Acc:MGI:1914362]	GO:0005794	Golgi apparatus
Fgf22	fibroblast growth factor 22 [Source:MGI Symbol;Acc:MGI:1914362]	GO:0008284	positive regulation of cell population proliferation
Fgf22	fibroblast growth factor 22 [Source:MGI Symbol;Acc:MGI:1914362]	GO:0005104	fibroblast growth factor receptor binding
Fgf22	fibroblast growth factor 22 [Source:MGI Symbol;Acc:MGI:1914362]	GO:0001934	positive regulation of protein phosphorylation
Fgf22	fibroblast growth factor 22 [Source:MGI Symbol;Acc:MGI:1914362]	GO:0008543	fibroblast growth factor receptor signaling pathway
Fgf22	fibroblast growth factor 22 [Source:MGI Symbol;Acc:MGI:1914362]	GO:0009887	animal organ morphogenesis
Fgf22	fibroblast growth factor 22 [Source:MGI Symbol;Acc:MGI:1914362]	GO:0010628	positive regulation of gene expression
Fgf22	fibroblast growth factor 22 [Source:MGI Symbol;Acc:MGI:1914362]	GO:0030334	regulation of cell migration
Fgf22	fibroblast growth factor 22 [Source:MGI Symbol;Acc:MGI:1914362]	GO:0098794	postsynapse
Fgf22	fibroblast growth factor 22 [Source:MGI Symbol;Acc:MGI:1914362]	GO:0099537	trans-synaptic signaling
Fgf22	fibroblast growth factor 22 [Source:MGI Symbol;Acc:MGI:1914362]	GO:0090128	regulation of synapse maturation
Fgf22	fibroblast growth factor 22 [Source:MGI Symbol;Acc:MGI:1914362]	GO:0098982	GABA-ergic synapse
Fgf22	fibroblast growth factor 22 [Source:MGI Symbol;Acc:MGI:1914362]	GO:0043410	positive regulation of MAPK cascade
Fgf22	fibroblast growth factor 22 [Source:MGI Symbol;Acc:MGI:1914362]	GO:0099147	extrinsic component of postsynaptic density membrane
Ppargc1a	peroxisome proliferative activated receptor, gamma, coactivator 1 alpha [Source:MGI Symbol;Acc:MGI:1342774]	GO:0003723	RNA binding
Ppargc1a	peroxisome proliferative activated receptor, gamma, coactivator 1 alpha [Source:MGI Symbol;Acc:MGI:1342774]	GO:0003676	nucleic acid binding
Ppargc1a	peroxisome proliferative activated receptor, gamma, coactivator 1 alpha [Source:MGI Symbol;Acc:MGI:1342774]	GO:0003712	transcription coregulator activity
Ppargc1a	peroxisome proliferative activated receptor, gamma, coactivator 1 alpha [Source:MGI Symbol;Acc:MGI:1342774]	GO:0008134	transcription factor binding
Ppargc1a	peroxisome proliferative activated receptor, gamma, coactivator 1 alpha [Source:MGI Symbol;Acc:MGI:1342774]	GO:0005634	nucleus
Ppargc1a	peroxisome proliferative activated receptor, gamma, coactivator 1 alpha [Source:MGI Symbol;Acc:MGI:1342774]	GO:0045944	positive regulation of transcription by RNA polymerase II
Ppargc1a	peroxisome proliferative activated receptor, gamma, coactivator 1 alpha [Source:MGI Symbol;Acc:MGI:1342774]	GO:0005515	protein binding
Ppargc1a	peroxisome proliferative activated receptor, gamma, coactivator 1 alpha [Source:MGI Symbol;Acc:MGI:1342774]	GO:0007005	mitochondrion organization
Ppargc1a	peroxisome proliferative activated receptor, gamma, coactivator 1 alpha [Source:MGI Symbol;Acc:MGI:1342774]	GO:0043524	negative regulation of neuron apoptotic process
Ppargc1a	peroxisome proliferative activated receptor, gamma, coactivator 1 alpha [Source:MGI Symbol;Acc:MGI:1342774]	GO:0071560	cellular response to transforming growth factor beta stimulus
Ppargc1a	peroxisome proliferative activated receptor, gamma, coactivator 1 alpha [Source:MGI Symbol;Acc:MGI:1342774]	GO:0014850	response to muscle activity
Ppargc1a	peroxisome proliferative activated receptor, gamma, coactivator 1 alpha [Source:MGI Symbol;Acc:MGI:1342774]	GO:0051402	neuron apoptotic process
Ppargc1a	peroxisome proliferative activated receptor, gamma, coactivator 1 alpha [Source:MGI Symbol;Acc:MGI:1342774]	GO:0106222	lncRNA binding
Ppargc1a	peroxisome proliferative activated receptor, gamma, coactivator 1 alpha [Source:MGI Symbol;Acc:MGI:1342774]	GO:0003682	chromatin binding
Ppargc1a	peroxisome proliferative activated receptor, gamma, coactivator 1 alpha [Source:MGI Symbol;Acc:MGI:1342774]	GO:0001933	negative regulation of protein phosphorylation
Ppargc1a	peroxisome proliferative activated receptor, gamma, coactivator 1 alpha [Source:MGI Symbol;Acc:MGI:1342774]	GO:0022904	respiratory electron transport chain
Ppargc1a	peroxisome proliferative activated receptor, gamma, coactivator 1 alpha [Source:MGI Symbol;Acc:MGI:1342774]	GO:0000785	chromatin
Ppargc1a	peroxisome proliferative activated receptor, gamma, coactivator 1 alpha [Source:MGI Symbol;Acc:MGI:1342774]	GO:0043565	sequence-specific DNA binding
Ppargc1a	peroxisome proliferative activated receptor, gamma, coactivator 1 alpha [Source:MGI Symbol;Acc:MGI:1342774]	GO:0016605	PML body
Ppargc1a	peroxisome proliferative activated receptor, gamma, coactivator 1 alpha [Source:MGI Symbol;Acc:MGI:1342774]	GO:0006355	regulation of DNA-templated transcription
Ppargc1a	peroxisome proliferative activated receptor, gamma, coactivator 1 alpha [Source:MGI Symbol;Acc:MGI:1342774]	GO:0048511	rhythmic process
Ppargc1a	peroxisome proliferative activated receptor, gamma, coactivator 1 alpha [Source:MGI Symbol;Acc:MGI:1342774]	GO:0043025	neuronal cell body
Ppargc1a	peroxisome proliferative activated receptor, gamma, coactivator 1 alpha [Source:MGI Symbol;Acc:MGI:1342774]	GO:0003677	DNA binding
Ppargc1a	peroxisome proliferative activated receptor, gamma, coactivator 1 alpha [Source:MGI Symbol;Acc:MGI:1342774]	GO:0006094	gluconeogenesis
Ppargc1a	peroxisome proliferative activated receptor, gamma, coactivator 1 alpha [Source:MGI Symbol;Acc:MGI:1342774]	GO:0003713	transcription coactivator activity
Ppargc1a	peroxisome proliferative activated receptor, gamma, coactivator 1 alpha [Source:MGI Symbol;Acc:MGI:1342774]	GO:0045893	positive regulation of DNA-templated transcription
Ppargc1a	peroxisome proliferative activated receptor, gamma, coactivator 1 alpha [Source:MGI Symbol;Acc:MGI:1342774]	GO:0120162	positive regulation of cold-induced thermogenesis
Ppargc1a	peroxisome proliferative activated receptor, gamma, coactivator 1 alpha [Source:MGI Symbol;Acc:MGI:1342774]	GO:0005654	nucleoplasm
Ppargc1a	peroxisome proliferative activated receptor, gamma, coactivator 1 alpha [Source:MGI Symbol;Acc:MGI:1342774]	GO:1990841	promoter-specific chromatin binding
Ppargc1a	peroxisome proliferative activated receptor, gamma, coactivator 1 alpha [Source:MGI Symbol;Acc:MGI:1342774]	GO:0032922	circadian regulation of gene expression
Ppargc1a	peroxisome proliferative activated receptor, gamma, coactivator 1 alpha [Source:MGI Symbol;Acc:MGI:1342774]	GO:0002021	response to dietary excess
Ppargc1a	peroxisome proliferative activated receptor, gamma, coactivator 1 alpha [Source:MGI Symbol;Acc:MGI:1342774]	GO:0014823	response to activity
Ppargc1a	peroxisome proliferative activated receptor, gamma, coactivator 1 alpha [Source:MGI Symbol;Acc:MGI:1342774]	GO:0031490	chromatin DNA binding
Ppargc1a	peroxisome proliferative activated receptor, gamma, coactivator 1 alpha [Source:MGI Symbol;Acc:MGI:1342774]	GO:0042975	peroxisome proliferator activated receptor binding
Ppargc1a	peroxisome proliferative activated receptor, gamma, coactivator 1 alpha [Source:MGI Symbol;Acc:MGI:1342774]	GO:0097009	energy homeostasis
Ppargc1a	peroxisome proliferative activated receptor, gamma, coactivator 1 alpha [Source:MGI Symbol;Acc:MGI:1342774]	GO:0034599	cellular response to oxidative stress
Ppargc1a	peroxisome proliferative activated receptor, gamma, coactivator 1 alpha [Source:MGI Symbol;Acc:MGI:1342774]	GO:0000791	euchromatin
Ppargc1a	peroxisome proliferative activated receptor, gamma, coactivator 1 alpha [Source:MGI Symbol;Acc:MGI:1342774]	GO:0048662	negative regulation of smooth muscle cell proliferation
Ppargc1a	peroxisome proliferative activated receptor, gamma, coactivator 1 alpha [Source:MGI Symbol;Acc:MGI:1342774]	GO:0071372	cellular response to follicle-stimulating hormone stimulus
Ppargc1a	peroxisome proliferative activated receptor, gamma, coactivator 1 alpha [Source:MGI Symbol;Acc:MGI:1342774]	GO:0042752	regulation of circadian rhythm
Ppargc1a	peroxisome proliferative activated receptor, gamma, coactivator 1 alpha [Source:MGI Symbol;Acc:MGI:1342774]	GO:0030331	nuclear estrogen receptor binding
Ppargc1a	peroxisome proliferative activated receptor, gamma, coactivator 1 alpha [Source:MGI Symbol;Acc:MGI:1342774]	GO:1904707	positive regulation of vascular associated smooth muscle cell proliferation
Ppargc1a	peroxisome proliferative activated receptor, gamma, coactivator 1 alpha [Source:MGI Symbol;Acc:MGI:1342774]	GO:0061629	RNA polymerase II-specific DNA-binding transcription factor binding
Ppargc1a	peroxisome proliferative activated receptor, gamma, coactivator 1 alpha [Source:MGI Symbol;Acc:MGI:1342774]	GO:0051091	positive regulation of DNA-binding transcription factor activity
Ppargc1a	peroxisome proliferative activated receptor, gamma, coactivator 1 alpha [Source:MGI Symbol;Acc:MGI:1342774]	GO:0043014	alpha-tubulin binding
Ppargc1a	peroxisome proliferative activated receptor, gamma, coactivator 1 alpha [Source:MGI Symbol;Acc:MGI:1342774]	GO:0014912	negative regulation of smooth muscle cell migration
Ppargc1a	peroxisome proliferative activated receptor, gamma, coactivator 1 alpha [Source:MGI Symbol;Acc:MGI:1342774]	GO:0016922	nuclear receptor binding
Ppargc1a	peroxisome proliferative activated receptor, gamma, coactivator 1 alpha [Source:MGI Symbol;Acc:MGI:1342774]	GO:0030374	nuclear receptor coactivator activity
Ppargc1a	peroxisome proliferative activated receptor, gamma, coactivator 1 alpha [Source:MGI Symbol;Acc:MGI:1342774]	GO:0031625	ubiquitin protein ligase binding
Ppargc1a	peroxisome proliferative activated receptor, gamma, coactivator 1 alpha [Source:MGI Symbol;Acc:MGI:1342774]	GO:0010628	positive regulation of gene expression
Ppargc1a	peroxisome proliferative activated receptor, gamma, coactivator 1 alpha [Source:MGI Symbol;Acc:MGI:1342774]	GO:0045820	negative regulation of glycolytic process
Ppargc1a	peroxisome proliferative activated receptor, gamma, coactivator 1 alpha [Source:MGI Symbol;Acc:MGI:1342774]	GO:0046321	positive regulation of fatty acid oxidation
Ppargc1a	peroxisome proliferative activated receptor, gamma, coactivator 1 alpha [Source:MGI Symbol;Acc:MGI:1342774]	GO:0060612	adipose tissue development
Ppargc1a	peroxisome proliferative activated receptor, gamma, coactivator 1 alpha [Source:MGI Symbol;Acc:MGI:1342774]	GO:0090258	negative regulation of mitochondrial fission
Ppargc1a	peroxisome proliferative activated receptor, gamma, coactivator 1 alpha [Source:MGI Symbol;Acc:MGI:1342774]	GO:0097067	cellular response to thyroid hormone stimulus
Ppargc1a	peroxisome proliferative activated receptor, gamma, coactivator 1 alpha [Source:MGI Symbol;Acc:MGI:1342774]	GO:1904635	positive regulation of podocyte apoptotic process
Ppargc1a	peroxisome proliferative activated receptor, gamma, coactivator 1 alpha [Source:MGI Symbol;Acc:MGI:1342774]	GO:2000184	positive regulation of progesterone biosynthetic process
Ppargc1a	peroxisome proliferative activated receptor, gamma, coactivator 1 alpha [Source:MGI Symbol;Acc:MGI:1342774]	GO:0005829	cytosol
Ppargc1a	peroxisome proliferative activated receptor, gamma, coactivator 1 alpha [Source:MGI Symbol;Acc:MGI:1342774]	GO:0022626	cytosolic ribosome
Ppargc1a	peroxisome proliferative activated receptor, gamma, coactivator 1 alpha [Source:MGI Symbol;Acc:MGI:1342774]	GO:0097440	apical dendrite
Ror1	receptor tyrosine kinase-like orphan receptor 1 [Source:MGI Symbol;Acc:MGI:1347520]	GO:0005524	ATP binding
Ror1	receptor tyrosine kinase-like orphan receptor 1 [Source:MGI Symbol;Acc:MGI:1347520]	GO:0005515	protein binding
Ror1	receptor tyrosine kinase-like orphan receptor 1 [Source:MGI Symbol;Acc:MGI:1347520]	GO:0004672	protein kinase activity
Ror1	receptor tyrosine kinase-like orphan receptor 1 [Source:MGI Symbol;Acc:MGI:1347520]	GO:0006468	protein phosphorylation
Ror1	receptor tyrosine kinase-like orphan receptor 1 [Source:MGI Symbol;Acc:MGI:1347520]	GO:0007169	cell surface receptor protein tyrosine kinase signaling pathway
Ror1	receptor tyrosine kinase-like orphan receptor 1 [Source:MGI Symbol;Acc:MGI:1347520]	GO:0042995	cell projection
Ror1	receptor tyrosine kinase-like orphan receptor 1 [Source:MGI Symbol;Acc:MGI:1347520]	GO:0016020	membrane
Ror1	receptor tyrosine kinase-like orphan receptor 1 [Source:MGI Symbol;Acc:MGI:1347520]	GO:0005886	plasma membrane
Ror1	receptor tyrosine kinase-like orphan receptor 1 [Source:MGI Symbol;Acc:MGI:1347520]	GO:0016055	Wnt signaling pathway
Ror1	receptor tyrosine kinase-like orphan receptor 1 [Source:MGI Symbol;Acc:MGI:1347520]	GO:0030424	axon
Ror1	receptor tyrosine kinase-like orphan receptor 1 [Source:MGI Symbol;Acc:MGI:1347520]	GO:0009986	cell surface
Ror1	receptor tyrosine kinase-like orphan receptor 1 [Source:MGI Symbol;Acc:MGI:1347520]	GO:0007605	sensory perception of sound
Ror1	receptor tyrosine kinase-like orphan receptor 1 [Source:MGI Symbol;Acc:MGI:1347520]	GO:0043235	receptor complex
Ror1	receptor tyrosine kinase-like orphan receptor 1 [Source:MGI Symbol;Acc:MGI:1347520]	GO:0001725	stress fiber
Ror1	receptor tyrosine kinase-like orphan receptor 1 [Source:MGI Symbol;Acc:MGI:1347520]	GO:0043123	positive regulation of canonical NF-kappaB signal transduction
Ror1	receptor tyrosine kinase-like orphan receptor 1 [Source:MGI Symbol;Acc:MGI:1347520]	GO:0051092	positive regulation of NF-kappaB transcription factor activity
Ror1	receptor tyrosine kinase-like orphan receptor 1 [Source:MGI Symbol;Acc:MGI:1347520]	GO:0017147	Wnt-protein binding
Ror1	receptor tyrosine kinase-like orphan receptor 1 [Source:MGI Symbol;Acc:MGI:1347520]	GO:0048839	inner ear development
Ror1	receptor tyrosine kinase-like orphan receptor 1 [Source:MGI Symbol;Acc:MGI:1347520]	GO:0043679	axon terminus
Ror1	receptor tyrosine kinase-like orphan receptor 1 [Source:MGI Symbol;Acc:MGI:1347520]	GO:0014002	astrocyte development
Ror1	receptor tyrosine kinase-like orphan receptor 1 [Source:MGI Symbol;Acc:MGI:1347520]	GO:0051897	positive regulation of phosphatidylinositol 3-kinase/protein kinase B signal transduction
Ror1	receptor tyrosine kinase-like orphan receptor 1 [Source:MGI Symbol;Acc:MGI:1347520]	GO:0004714	transmembrane receptor protein tyrosine kinase activity
Ror1	receptor tyrosine kinase-like orphan receptor 1 [Source:MGI Symbol;Acc:MGI:1347520]	GO:0010976	positive regulation of neuron projection development
Ror1	receptor tyrosine kinase-like orphan receptor 1 [Source:MGI Symbol;Acc:MGI:1347520]	GO:0042813	Wnt receptor activity
Ror1	receptor tyrosine kinase-like orphan receptor 1 [Source:MGI Symbol;Acc:MGI:1347520]	GO:0038023	signaling receptor activity
Ror1	receptor tyrosine kinase-like orphan receptor 1 [Source:MGI Symbol;Acc:MGI:1347520]	GO:0008283	cell population proliferation
Calca	calcitonin/calcitonin-related polypeptide, alpha [Source:MGI Symbol;Acc:MGI:2151253]	GO:0005576	extracellular region
Calca	calcitonin/calcitonin-related polypeptide, alpha [Source:MGI Symbol;Acc:MGI:2151253]	GO:0005179	hormone activity
Calca	calcitonin/calcitonin-related polypeptide, alpha [Source:MGI Symbol;Acc:MGI:2151253]	GO:0001503	ossification
Calca	calcitonin/calcitonin-related polypeptide, alpha [Source:MGI Symbol;Acc:MGI:2151253]	GO:0006954	inflammatory response
Calca	calcitonin/calcitonin-related polypeptide, alpha [Source:MGI Symbol;Acc:MGI:2151253]	GO:0005737	cytoplasm
Calca	calcitonin/calcitonin-related polypeptide, alpha [Source:MGI Symbol;Acc:MGI:2151253]	GO:0030424	axon
Calca	calcitonin/calcitonin-related polypeptide, alpha [Source:MGI Symbol;Acc:MGI:2151253]	GO:0005615	extracellular space
Calca	calcitonin/calcitonin-related polypeptide, alpha [Source:MGI Symbol;Acc:MGI:2151253]	GO:0043025	neuronal cell body
Calca	calcitonin/calcitonin-related polypeptide, alpha [Source:MGI Symbol;Acc:MGI:2151253]	GO:0007165	signal transduction
Calca	calcitonin/calcitonin-related polypeptide, alpha [Source:MGI Symbol;Acc:MGI:2151253]	GO:0007189	adenylate cyclase-activating G protein-coupled receptor signaling pathway
Calca	calcitonin/calcitonin-related polypeptide, alpha [Source:MGI Symbol;Acc:MGI:2151253]	GO:0006874	intracellular calcium ion homeostasis
Calca	calcitonin/calcitonin-related polypeptide, alpha [Source:MGI Symbol;Acc:MGI:2151253]	GO:1990090	cellular response to nerve growth factor stimulus
Calca	calcitonin/calcitonin-related polypeptide, alpha [Source:MGI Symbol;Acc:MGI:2151253]	GO:0043005	neuron projection
Calca	calcitonin/calcitonin-related polypeptide, alpha [Source:MGI Symbol;Acc:MGI:2151253]	GO:0050965	detection of temperature stimulus involved in sensory perception of pain
Calca	calcitonin/calcitonin-related polypeptide, alpha [Source:MGI Symbol;Acc:MGI:2151253]	GO:0051480	regulation of cytosolic calcium ion concentration
Calca	calcitonin/calcitonin-related polypeptide, alpha [Source:MGI Symbol;Acc:MGI:2151253]	GO:0048240	sperm capacitation
Calca	calcitonin/calcitonin-related polypeptide, alpha [Source:MGI Symbol;Acc:MGI:2151253]	GO:0043195	terminal bouton
Calca	calcitonin/calcitonin-related polypeptide, alpha [Source:MGI Symbol;Acc:MGI:2151253]	GO:0009408	response to heat
Calca	calcitonin/calcitonin-related polypeptide, alpha [Source:MGI Symbol;Acc:MGI:2151253]	GO:0007631	feeding behavior
Calca	calcitonin/calcitonin-related polypeptide, alpha [Source:MGI Symbol;Acc:MGI:2151253]	GO:0005102	signaling receptor binding
Calca	calcitonin/calcitonin-related polypeptide, alpha [Source:MGI Symbol;Acc:MGI:2151253]	GO:0042311	vasodilation
Calca	calcitonin/calcitonin-related polypeptide, alpha [Source:MGI Symbol;Acc:MGI:2151253]	GO:0045776	negative regulation of blood pressure
Calca	calcitonin/calcitonin-related polypeptide, alpha [Source:MGI Symbol;Acc:MGI:2151253]	GO:0030279	negative regulation of ossification
Calca	calcitonin/calcitonin-related polypeptide, alpha [Source:MGI Symbol;Acc:MGI:2151253]	GO:0007218	neuropeptide signaling pathway
Calca	calcitonin/calcitonin-related polypeptide, alpha [Source:MGI Symbol;Acc:MGI:2151253]	GO:0048265	response to pain
Calca	calcitonin/calcitonin-related polypeptide, alpha [Source:MGI Symbol;Acc:MGI:2151253]	GO:0098686	hippocampal mossy fiber to CA3 synapse
Calca	calcitonin/calcitonin-related polypeptide, alpha [Source:MGI Symbol;Acc:MGI:2151253]	GO:0006939	smooth muscle contraction
Calca	calcitonin/calcitonin-related polypeptide, alpha [Source:MGI Symbol;Acc:MGI:2151253]	GO:0045986	negative regulation of smooth muscle contraction
Calca	calcitonin/calcitonin-related polypeptide, alpha [Source:MGI Symbol;Acc:MGI:2151253]	GO:0098992	neuronal dense core vesicle
Calca	calcitonin/calcitonin-related polypeptide, alpha [Source:MGI Symbol;Acc:MGI:2151253]	GO:0001976	nervous system process involved in regulation of systemic arterial blood pressure
Calca	calcitonin/calcitonin-related polypeptide, alpha [Source:MGI Symbol;Acc:MGI:2151253]	GO:0001984	artery vasodilation involved in baroreceptor response to increased systemic arterial blood pressure
Calca	calcitonin/calcitonin-related polypeptide, alpha [Source:MGI Symbol;Acc:MGI:2151253]	GO:0031716	calcitonin receptor binding
Calca	calcitonin/calcitonin-related polypeptide, alpha [Source:MGI Symbol;Acc:MGI:2151253]
Calca	calcitonin/calcitonin-related polypeptide, alpha [Source:MGI Symbol;Acc:MGI:2151253]	GO:0042802	identical protein binding
Calca	calcitonin/calcitonin-related polypeptide, alpha [Source:MGI Symbol;Acc:MGI:2151253]	GO:0002548	monocyte chemotaxis
Calca	calcitonin/calcitonin-related polypeptide, alpha [Source:MGI Symbol;Acc:MGI:2151253]	GO:0007204	positive regulation of cytosolic calcium ion concentration
Calca	calcitonin/calcitonin-related polypeptide, alpha [Source:MGI Symbol;Acc:MGI:2151253]	GO:0007566	embryo implantation
Calca	calcitonin/calcitonin-related polypeptide, alpha [Source:MGI Symbol;Acc:MGI:2151253]	GO:0045779	negative regulation of bone resorption
Calca	calcitonin/calcitonin-related polypeptide, alpha [Source:MGI Symbol;Acc:MGI:2151253]	GO:0045892	negative regulation of DNA-templated transcription
Calca	calcitonin/calcitonin-related polypeptide, alpha [Source:MGI Symbol;Acc:MGI:2151253]	GO:0071356	cellular response to tumor necrosis factor
Jak2	Janus kinase 2 [Source:MGI Symbol;Acc:MGI:96629]	GO:0005524	ATP binding
Jak2	Janus kinase 2 [Source:MGI Symbol;Acc:MGI:96629]	GO:0016020	membrane
Jak2	Janus kinase 2 [Source:MGI Symbol;Acc:MGI:96629]	GO:0005856	cytoskeleton
Jak2	Janus kinase 2 [Source:MGI Symbol;Acc:MGI:96629]	GO:0035556	intracellular signal transduction
Jak2	Janus kinase 2 [Source:MGI Symbol;Acc:MGI:96629]	GO:0004672	protein kinase activity
Jak2	Janus kinase 2 [Source:MGI Symbol;Acc:MGI:96629]	GO:0006468	protein phosphorylation
Jak2	Janus kinase 2 [Source:MGI Symbol;Acc:MGI:96629]	GO:0004715	non-membrane spanning protein tyrosine kinase activity
Jak2	Janus kinase 2 [Source:MGI Symbol;Acc:MGI:96629]	GO:0042393	histone binding
Jak2	Janus kinase 2 [Source:MGI Symbol;Acc:MGI:96629]	GO:0006325	chromatin organization
Jak2	Janus kinase 2 [Source:MGI Symbol;Acc:MGI:96629]	GO:0012505	endomembrane system
Jak2	Janus kinase 2 [Source:MGI Symbol;Acc:MGI:96629]	GO:0019221	cytokine-mediated signaling pathway
Jak2	Janus kinase 2 [Source:MGI Symbol;Acc:MGI:96629]	GO:0004713	protein tyrosine kinase activity
Jak2	Janus kinase 2 [Source:MGI Symbol;Acc:MGI:96629]	GO:0008284	positive regulation of cell population proliferation
Jak2	Janus kinase 2 [Source:MGI Symbol;Acc:MGI:96629]	GO:0071222	cellular response to lipopolysaccharide
Jak2	Janus kinase 2 [Source:MGI Symbol;Acc:MGI:96629]	GO:0043066	negative regulation of apoptotic process
Jak2	Janus kinase 2 [Source:MGI Symbol;Acc:MGI:96629]	GO:0045944	positive regulation of transcription by RNA polymerase II
Jak2	Janus kinase 2 [Source:MGI Symbol;Acc:MGI:96629]	GO:0005515	protein binding
Jak2	Janus kinase 2 [Source:MGI Symbol;Acc:MGI:96629]	GO:0043524	negative regulation of neuron apoptotic process
Jak2	Janus kinase 2 [Source:MGI Symbol;Acc:MGI:96629]	GO:0071549	cellular response to dexamethasone stimulus
Jak2	Janus kinase 2 [Source:MGI Symbol;Acc:MGI:96629]	GO:0048008	platelet-derived growth factor receptor signaling pathway
Jak2	Janus kinase 2 [Source:MGI Symbol;Acc:MGI:96629]	GO:0008285	negative regulation of cell population proliferation
Jak2	Janus kinase 2 [Source:MGI Symbol;Acc:MGI:96629]	GO:0005737	cytoplasm
Jak2	Janus kinase 2 [Source:MGI Symbol;Acc:MGI:96629]	GO:0030099	myeloid cell differentiation
Jak2	Janus kinase 2 [Source:MGI Symbol;Acc:MGI:96629]	GO:0006366	transcription by RNA polymerase II
Jak2	Janus kinase 2 [Source:MGI Symbol;Acc:MGI:96629]	GO:0007259	cell surface receptor signaling pathway via JAK-STAT
Jak2	Janus kinase 2 [Source:MGI Symbol;Acc:MGI:96629]	GO:0005634	nucleus
Jak2	Janus kinase 2 [Source:MGI Symbol;Acc:MGI:96629]	GO:0046872	metal ion binding
Jak2	Janus kinase 2 [Source:MGI Symbol;Acc:MGI:96629]	GO:0002250	adaptive immune response
Jak2	Janus kinase 2 [Source:MGI Symbol;Acc:MGI:96629]	GO:0005829	cytosol
Jak2	Janus kinase 2 [Source:MGI Symbol;Acc:MGI:96629]	GO:0006338	chromatin remodeling
Jak2	Janus kinase 2 [Source:MGI Symbol;Acc:MGI:96629]	GO:0007186	G protein-coupled receptor signaling pathway
Jak2	Janus kinase 2 [Source:MGI Symbol;Acc:MGI:96629]	GO:0045087	innate immune response
Jak2	Janus kinase 2 [Source:MGI Symbol;Acc:MGI:96629]	GO:0007165	signal transduction
Jak2	Janus kinase 2 [Source:MGI Symbol;Acc:MGI:96629]	GO:0043410	positive regulation of MAPK cascade
Jak2	Janus kinase 2 [Source:MGI Symbol;Acc:MGI:96629]	GO:0020037	heme binding
Jak2	Janus kinase 2 [Source:MGI Symbol;Acc:MGI:96629]	GO:0007204	positive regulation of cytosolic calcium ion concentration
Jak2	Janus kinase 2 [Source:MGI Symbol;Acc:MGI:96629]	GO:0098978	glutamatergic synapse
Jak2	Janus kinase 2 [Source:MGI Symbol;Acc:MGI:96629]	GO:0045429	positive regulation of nitric oxide biosynthetic process
Jak2	Janus kinase 2 [Source:MGI Symbol;Acc:MGI:96629]	GO:0043065	positive regulation of apoptotic process
Jak2	Janus kinase 2 [Source:MGI Symbol;Acc:MGI:96629]	GO:0098794	postsynapse
Jak2	Janus kinase 2 [Source:MGI Symbol;Acc:MGI:96629]	GO:0120162	positive regulation of cold-induced thermogenesis
Jak2	Janus kinase 2 [Source:MGI Symbol;Acc:MGI:96629]	GO:0046777	protein autophosphorylation
Jak2	Janus kinase 2 [Source:MGI Symbol;Acc:MGI:96629]	GO:0010667	negative regulation of cardiac muscle cell apoptotic process
Jak2	Janus kinase 2 [Source:MGI Symbol;Acc:MGI:96629]	GO:0005901	caveola
Jak2	Janus kinase 2 [Source:MGI Symbol;Acc:MGI:96629]	GO:0007167	enzyme-linked receptor protein signaling pathway
Jak2	Janus kinase 2 [Source:MGI Symbol;Acc:MGI:96629]	GO:0031103	axon regeneration
Jak2	Janus kinase 2 [Source:MGI Symbol;Acc:MGI:96629]	GO:0045121	membrane raft
Jak2	Janus kinase 2 [Source:MGI Symbol;Acc:MGI:96629]	GO:0061180	mammary gland epithelium development
Jak2	Janus kinase 2 [Source:MGI Symbol;Acc:MGI:96629]	GO:0042981	regulation of apoptotic process
Jak2	Janus kinase 2 [Source:MGI Symbol;Acc:MGI:96629]	GO:0030154	cell differentiation
Jak2	Janus kinase 2 [Source:MGI Symbol;Acc:MGI:96629]	GO:0042307	positive regulation of protein import into nucleus
Jak2	Janus kinase 2 [Source:MGI Symbol;Acc:MGI:96629]	GO:0030218	erythrocyte differentiation
Jak2	Janus kinase 2 [Source:MGI Symbol;Acc:MGI:96629]	GO:0051897	positive regulation of phosphatidylinositol 3-kinase/protein kinase B signal transduction
Jak2	Janus kinase 2 [Source:MGI Symbol;Acc:MGI:96629]	GO:0030335	positive regulation of cell migration
Jak2	Janus kinase 2 [Source:MGI Symbol;Acc:MGI:96629]	GO:0005886	plasma membrane
Jak2	Janus kinase 2 [Source:MGI Symbol;Acc:MGI:96629]	GO:0000791	euchromatin
Jak2	Janus kinase 2 [Source:MGI Symbol;Acc:MGI:96629]	GO:0019901	protein kinase binding
Jak2	Janus kinase 2 [Source:MGI Symbol;Acc:MGI:96629]	GO:0022408	negative regulation of cell-cell adhesion
Jak2	Janus kinase 2 [Source:MGI Symbol;Acc:MGI:96629]	GO:0006979	response to oxidative stress
Jak2	Janus kinase 2 [Source:MGI Symbol;Acc:MGI:96629]	GO:2001235	positive regulation of apoptotic signaling pathway
Jak2	Janus kinase 2 [Source:MGI Symbol;Acc:MGI:96629]	GO:0046677	response to antibiotic
Jak2	Janus kinase 2 [Source:MGI Symbol;Acc:MGI:96629]	GO:0032024	positive regulation of insulin secretion
Jak2	Janus kinase 2 [Source:MGI Symbol;Acc:MGI:96629]	GO:0045597	positive regulation of cell differentiation
Jak2	Janus kinase 2 [Source:MGI Symbol;Acc:MGI:96629]	GO:0051770	positive regulation of nitric-oxide synthase biosynthetic process
Jak2	Janus kinase 2 [Source:MGI Symbol;Acc:MGI:96629]	GO:0008631	intrinsic apoptotic signaling pathway in response to oxidative stress
Jak2	Janus kinase 2 [Source:MGI Symbol;Acc:MGI:96629]	GO:1904707	positive regulation of vascular associated smooth muscle cell proliferation
Jak2	Janus kinase 2 [Source:MGI Symbol;Acc:MGI:96629]	GO:0050729	positive regulation of inflammatory response
Jak2	Janus kinase 2 [Source:MGI Symbol;Acc:MGI:96629]	GO:0033209	tumor necrosis factor-mediated signaling pathway
Jak2	Janus kinase 2 [Source:MGI Symbol;Acc:MGI:96629]	GO:0051091	positive regulation of DNA-binding transcription factor activity
Jak2	Janus kinase 2 [Source:MGI Symbol;Acc:MGI:96629]	GO:0032496	response to lipopolysaccharide
Jak2	Janus kinase 2 [Source:MGI Symbol;Acc:MGI:96629]	GO:0034612	response to tumor necrosis factor
Jak2	Janus kinase 2 [Source:MGI Symbol;Acc:MGI:96629]	GO:0005131	growth hormone receptor binding
Jak2	Janus kinase 2 [Source:MGI Symbol;Acc:MGI:96629]	GO:0043548	phosphatidylinositol 3-kinase binding
Jak2	Janus kinase 2 [Source:MGI Symbol;Acc:MGI:96629]	GO:0032731	positive regulation of interleukin-1 beta production
Jak2	Janus kinase 2 [Source:MGI Symbol;Acc:MGI:96629]	GO:0032760	positive regulation of tumor necrosis factor production
Jak2	Janus kinase 2 [Source:MGI Symbol;Acc:MGI:96629]	GO:0097191	extrinsic apoptotic signaling pathway
Jak2	Janus kinase 2 [Source:MGI Symbol;Acc:MGI:96629]	GO:0043687	post-translational protein modification
Jak2	Janus kinase 2 [Source:MGI Symbol;Acc:MGI:96629]	GO:0050804	modulation of chemical synaptic transmission
Jak2	Janus kinase 2 [Source:MGI Symbol;Acc:MGI:96629]	GO:0001774	microglial cell activation
Jak2	Janus kinase 2 [Source:MGI Symbol;Acc:MGI:96629]	GO:0045348	positive regulation of MHC class II biosynthetic process
Jak2	Janus kinase 2 [Source:MGI Symbol;Acc:MGI:96629]	GO:2000273	positive regulation of signaling receptor activity
Jak2	Janus kinase 2 [Source:MGI Symbol;Acc:MGI:96629]	GO:0033194	response to hydroperoxide
Jak2	Janus kinase 2 [Source:MGI Symbol;Acc:MGI:96629]	GO:0045428	regulation of nitric oxide biosynthetic process
Jak2	Janus kinase 2 [Source:MGI Symbol;Acc:MGI:96629]	GO:0009755	hormone-mediated signaling pathway
Jak2	Janus kinase 2 [Source:MGI Symbol;Acc:MGI:96629]	GO:0043560	insulin receptor substrate binding
Jak2	Janus kinase 2 [Source:MGI Symbol;Acc:MGI:96629]	GO:0042531	positive regulation of tyrosine phosphorylation of STAT protein
Jak2	Janus kinase 2 [Source:MGI Symbol;Acc:MGI:96629]	GO:0033130	acetylcholine receptor binding
Jak2	Janus kinase 2 [Source:MGI Symbol;Acc:MGI:96629]	GO:1904037	positive regulation of epithelial cell apoptotic process
Jak2	Janus kinase 2 [Source:MGI Symbol;Acc:MGI:96629]	GO:0060396	growth hormone receptor signaling pathway
Jak2	Janus kinase 2 [Source:MGI Symbol;Acc:MGI:96629]	GO:0050727	regulation of inflammatory response
Jak2	Janus kinase 2 [Source:MGI Symbol;Acc:MGI:96629]	GO:0050867	positive regulation of cell activation
Jak2	Janus kinase 2 [Source:MGI Symbol;Acc:MGI:96629]	GO:0051428	peptide hormone receptor binding
Jak2	Janus kinase 2 [Source:MGI Symbol;Acc:MGI:96629]	GO:0007260	tyrosine phosphorylation of STAT protein
Jak2	Janus kinase 2 [Source:MGI Symbol;Acc:MGI:96629]	GO:0060397	growth hormone receptor signaling pathway via JAK-STAT
Jak2	Janus kinase 2 [Source:MGI Symbol;Acc:MGI:96629]	GO:1902728	positive regulation of growth factor dependent skeletal muscle satellite cell proliferation
Jak2	Janus kinase 2 [Source:MGI Symbol;Acc:MGI:96629]	GO:0031702	type 1 angiotensin receptor binding
Jak2	Janus kinase 2 [Source:MGI Symbol;Acc:MGI:96629]	GO:0045822	negative regulation of heart contraction
Jak2	Janus kinase 2 [Source:MGI Symbol;Acc:MGI:96629]	GO:0060391	positive regulation of SMAD protein signal transduction
Jak2	Janus kinase 2 [Source:MGI Symbol;Acc:MGI:96629]	GO:0034050	symbiont-induced defense-related programmed cell death
Jak2	Janus kinase 2 [Source:MGI Symbol;Acc:MGI:96629]	GO:0036016	cellular response to interleukin-3
Jak2	Janus kinase 2 [Source:MGI Symbol;Acc:MGI:96629]	GO:0005143	interleukin-12 receptor binding
Jak2	Janus kinase 2 [Source:MGI Symbol;Acc:MGI:96629]	GO:0035401	histone H3Y41 kinase activity
Jak2	Janus kinase 2 [Source:MGI Symbol;Acc:MGI:96629]	GO:0006919	activation of cysteine-type endopeptidase activity involved in apoptotic process
Jak2	Janus kinase 2 [Source:MGI Symbol;Acc:MGI:96629]	GO:0006955	immune response
Jak2	Janus kinase 2 [Source:MGI Symbol;Acc:MGI:96629]	GO:0010811	positive regulation of cell-substrate adhesion
Jak2	Janus kinase 2 [Source:MGI Symbol;Acc:MGI:96629]	GO:0031959	intracellular mineralocorticoid receptor signaling pathway
Jak2	Janus kinase 2 [Source:MGI Symbol;Acc:MGI:96629]	GO:0032516	positive regulation of phosphoprotein phosphatase activity
Jak2	Janus kinase 2 [Source:MGI Symbol;Acc:MGI:96629]	GO:0032729	positive regulation of type II interferon production
Jak2	Janus kinase 2 [Source:MGI Symbol;Acc:MGI:96629]	GO:0032740	positive regulation of interleukin-17 production
Jak2	Janus kinase 2 [Source:MGI Symbol;Acc:MGI:96629]	GO:0032819	positive regulation of natural killer cell proliferation
Jak2	Janus kinase 2 [Source:MGI Symbol;Acc:MGI:96629]	GO:0035166	post-embryonic hemopoiesis
Jak2	Janus kinase 2 [Source:MGI Symbol;Acc:MGI:96629]	GO:0035722	interleukin-12-mediated signaling pathway
Jak2	Janus kinase 2 [Source:MGI Symbol;Acc:MGI:96629]	GO:0042102	positive regulation of T cell proliferation
Jak2	Janus kinase 2 [Source:MGI Symbol;Acc:MGI:96629]	GO:0042976	activation of Janus kinase activity
Jak2	Janus kinase 2 [Source:MGI Symbol;Acc:MGI:96629]	GO:0043388	positive regulation of DNA binding
Jak2	Janus kinase 2 [Source:MGI Symbol;Acc:MGI:96629]	GO:0046427	positive regulation of receptor signaling pathway via JAK-STAT
Jak2	Janus kinase 2 [Source:MGI Symbol;Acc:MGI:96629]	GO:0051142	positive regulation of NK T cell proliferation
Jak2	Janus kinase 2 [Source:MGI Symbol;Acc:MGI:96629]	GO:0060333	type II interferon-mediated signaling pathway
Jak2	Janus kinase 2 [Source:MGI Symbol;Acc:MGI:96629]	GO:0060399	positive regulation of growth hormone receptor signaling pathway
Jak2	Janus kinase 2 [Source:MGI Symbol;Acc:MGI:96629]	GO:0070671	response to interleukin-12
Jak2	Janus kinase 2 [Source:MGI Symbol;Acc:MGI:96629]	GO:0097012	response to granulocyte macrophage colony-stimulating factor
Jak2	Janus kinase 2 [Source:MGI Symbol;Acc:MGI:96629]	GO:0097296	activation of cysteine-type endopeptidase activity involved in apoptotic signaling pathway
Jak2	Janus kinase 2 [Source:MGI Symbol;Acc:MGI:96629]	GO:1905539	regulation of postsynapse to nucleus signaling pathway
Jak2	Janus kinase 2 [Source:MGI Symbol;Acc:MGI:96629]	GO:2000318	positive regulation of T-helper 17 type immune response
Jak2	Janus kinase 2 [Source:MGI Symbol;Acc:MGI:96629]	GO:0042022	interleukin-12 receptor complex
Jak2	Janus kinase 2 [Source:MGI Symbol;Acc:MGI:96629]	GO:0072536	interleukin-23 receptor complex
Jak2	Janus kinase 2 [Source:MGI Symbol;Acc:MGI:96629]	GO:0005102	signaling receptor binding
Jak2	Janus kinase 2 [Source:MGI Symbol;Acc:MGI:96629]	GO:0042169	SH2 domain binding
Jak2	Janus kinase 2 [Source:MGI Symbol;Acc:MGI:96629]	GO:0042802	identical protein binding
Jak2	Janus kinase 2 [Source:MGI Symbol;Acc:MGI:96629]	GO:0010572	positive regulation of platelet activation
Jak2	Janus kinase 2 [Source:MGI Symbol;Acc:MGI:96629]	GO:0014070	response to organic cyclic compound
Jak2	Janus kinase 2 [Source:MGI Symbol;Acc:MGI:96629]	GO:0014075	response to amine
Jak2	Janus kinase 2 [Source:MGI Symbol;Acc:MGI:96629]	GO:0038043	interleukin-5-mediated signaling pathway
Jak2	Janus kinase 2 [Source:MGI Symbol;Acc:MGI:96629]	GO:0038065	collagen-activated signaling pathway
Jak2	Janus kinase 2 [Source:MGI Symbol;Acc:MGI:96629]	GO:0038155	interleukin-23-mediated signaling pathway
Jak2	Janus kinase 2 [Source:MGI Symbol;Acc:MGI:96629]	GO:0038156	interleukin-3-mediated signaling pathway
Jak2	Janus kinase 2 [Source:MGI Symbol;Acc:MGI:96629]	GO:0038157	granulocyte-macrophage colony-stimulating factor signaling pathway
Jak2	Janus kinase 2 [Source:MGI Symbol;Acc:MGI:96629]	GO:0038162	erythropoietin-mediated signaling pathway
Jak2	Janus kinase 2 [Source:MGI Symbol;Acc:MGI:96629]	GO:0070665	positive regulation of leukocyte proliferation
Jak2	Janus kinase 2 [Source:MGI Symbol;Acc:MGI:96629]	GO:1901731	positive regulation of platelet aggregation
Jak2	Janus kinase 2 [Source:MGI Symbol;Acc:MGI:96629]	GO:0005654	nucleoplasm
Jak2	Janus kinase 2 [Source:MGI Symbol;Acc:MGI:96629]	GO:0005925	focal adhesion
Jak2	Janus kinase 2 [Source:MGI Symbol;Acc:MGI:96629]	GO:0009898	cytoplasmic side of plasma membrane
Jak2	Janus kinase 2 [Source:MGI Symbol;Acc:MGI:96629]	GO:0019897	extrinsic component of plasma membrane
Jak2	Janus kinase 2 [Source:MGI Symbol;Acc:MGI:96629]	GO:0031234	extrinsic component of cytoplasmic side of plasma membrane
Jak2	Janus kinase 2 [Source:MGI Symbol;Acc:MGI:96629]	GO:0030526	granulocyte macrophage colony-stimulating factor receptor complex
Pik3r1	phosphoinositide-3-kinase regulatory subunit 1 [Source:MGI Symbol;Acc:MGI:97583]	GO:0005515	protein binding
Pik3r1	phosphoinositide-3-kinase regulatory subunit 1 [Source:MGI Symbol;Acc:MGI:97583]	GO:0007165	signal transduction
Pik3r1	phosphoinositide-3-kinase regulatory subunit 1 [Source:MGI Symbol;Acc:MGI:97583]	GO:0043066	negative regulation of apoptotic process
Pik3r1	phosphoinositide-3-kinase regulatory subunit 1 [Source:MGI Symbol;Acc:MGI:97583]	GO:0010628	positive regulation of gene expression
Pik3r1	phosphoinositide-3-kinase regulatory subunit 1 [Source:MGI Symbol;Acc:MGI:97583]	GO:0045944	positive regulation of transcription by RNA polymerase II
Pik3r1	phosphoinositide-3-kinase regulatory subunit 1 [Source:MGI Symbol;Acc:MGI:97583]	GO:0006006	glucose metabolic process
Pik3r1	phosphoinositide-3-kinase regulatory subunit 1 [Source:MGI Symbol;Acc:MGI:97583]	GO:0032868	response to insulin
Pik3r1	phosphoinositide-3-kinase regulatory subunit 1 [Source:MGI Symbol;Acc:MGI:97583]	GO:0006366	transcription by RNA polymerase II
Pik3r1	phosphoinositide-3-kinase regulatory subunit 1 [Source:MGI Symbol;Acc:MGI:97583]	GO:0005634	nucleus
Pik3r1	phosphoinositide-3-kinase regulatory subunit 1 [Source:MGI Symbol;Acc:MGI:97583]	GO:0005737	cytoplasm
Pik3r1	phosphoinositide-3-kinase regulatory subunit 1 [Source:MGI Symbol;Acc:MGI:97583]	GO:0016020	membrane
Pik3r1	phosphoinositide-3-kinase regulatory subunit 1 [Source:MGI Symbol;Acc:MGI:97583]	GO:0015031	protein transport
Pik3r1	phosphoinositide-3-kinase regulatory subunit 1 [Source:MGI Symbol;Acc:MGI:97583]	GO:0005829	cytosol
Pik3r1	phosphoinositide-3-kinase regulatory subunit 1 [Source:MGI Symbol;Acc:MGI:97583]	GO:0005911	cell-cell junction
Pik3r1	phosphoinositide-3-kinase regulatory subunit 1 [Source:MGI Symbol;Acc:MGI:97583]	GO:0001934	positive regulation of protein phosphorylation
Pik3r1	phosphoinositide-3-kinase regulatory subunit 1 [Source:MGI Symbol;Acc:MGI:97583]	GO:0036092	phosphatidylinositol-3-phosphate biosynthetic process
Pik3r1	phosphoinositide-3-kinase regulatory subunit 1 [Source:MGI Symbol;Acc:MGI:97583]	GO:0030183	B cell differentiation
Pik3r1	phosphoinositide-3-kinase regulatory subunit 1 [Source:MGI Symbol;Acc:MGI:97583]	GO:0051384	response to glucocorticoid
Pik3r1	phosphoinositide-3-kinase regulatory subunit 1 [Source:MGI Symbol;Acc:MGI:97583]	GO:0032760	positive regulation of tumor necrosis factor production
Pik3r1	phosphoinositide-3-kinase regulatory subunit 1 [Source:MGI Symbol;Acc:MGI:97583]	GO:0032991	protein-containing complex
Pik3r1	phosphoinositide-3-kinase regulatory subunit 1 [Source:MGI Symbol;Acc:MGI:97583]	GO:0050821	protein stabilization
Pik3r1	phosphoinositide-3-kinase regulatory subunit 1 [Source:MGI Symbol;Acc:MGI:97583]	GO:0019901	protein kinase binding
Pik3r1	phosphoinositide-3-kinase regulatory subunit 1 [Source:MGI Symbol;Acc:MGI:97583]	GO:0019904	protein domain specific binding
Pik3r1	phosphoinositide-3-kinase regulatory subunit 1 [Source:MGI Symbol;Acc:MGI:97583]	GO:0005161	platelet-derived growth factor receptor binding
Pik3r1	phosphoinositide-3-kinase regulatory subunit 1 [Source:MGI Symbol;Acc:MGI:97583]	GO:0030971	receptor tyrosine kinase binding
Pik3r1	phosphoinositide-3-kinase regulatory subunit 1 [Source:MGI Symbol;Acc:MGI:97583]	GO:0030316	osteoclast differentiation
Pik3r1	phosphoinositide-3-kinase regulatory subunit 1 [Source:MGI Symbol;Acc:MGI:97583]	GO:0046854	phosphatidylinositol phosphate biosynthetic process
Pik3r1	phosphoinositide-3-kinase regulatory subunit 1 [Source:MGI Symbol;Acc:MGI:97583]	GO:0005942	phosphatidylinositol 3-kinase complex
Pik3r1	phosphoinositide-3-kinase regulatory subunit 1 [Source:MGI Symbol;Acc:MGI:97583]	GO:0005516	calmodulin binding
Pik3r1	phosphoinositide-3-kinase regulatory subunit 1 [Source:MGI Symbol;Acc:MGI:97583]	GO:0033120	positive regulation of RNA splicing
Pik3r1	phosphoinositide-3-kinase regulatory subunit 1 [Source:MGI Symbol;Acc:MGI:97583]	GO:0051965	positive regulation of synapse assembly
Pik3r1	phosphoinositide-3-kinase regulatory subunit 1 [Source:MGI Symbol;Acc:MGI:97583]	GO:0046488	phosphatidylinositol metabolic process
Pik3r1	phosphoinositide-3-kinase regulatory subunit 1 [Source:MGI Symbol;Acc:MGI:97583]	GO:0032869	cellular response to insulin stimulus
Pik3r1	phosphoinositide-3-kinase regulatory subunit 1 [Source:MGI Symbol;Acc:MGI:97583]	GO:0046935	1-phosphatidylinositol-3-kinase regulator activity
Pik3r1	phosphoinositide-3-kinase regulatory subunit 1 [Source:MGI Symbol;Acc:MGI:97583]	GO:0030335	positive regulation of cell migration
Pik3r1	phosphoinositide-3-kinase regulatory subunit 1 [Source:MGI Symbol;Acc:MGI:97583]	GO:0010459	negative regulation of heart rate
Pik3r1	phosphoinositide-3-kinase regulatory subunit 1 [Source:MGI Symbol;Acc:MGI:97583]	GO:0008286	insulin receptor signaling pathway
Pik3r1	phosphoinositide-3-kinase regulatory subunit 1 [Source:MGI Symbol;Acc:MGI:97583]	GO:0006606	protein import into nucleus
Pik3r1	phosphoinositide-3-kinase regulatory subunit 1 [Source:MGI Symbol;Acc:MGI:97583]	GO:0005801	cis-Golgi network
Pik3r1	phosphoinositide-3-kinase regulatory subunit 1 [Source:MGI Symbol;Acc:MGI:97583]	GO:0048471	perinuclear region of cytoplasm
Pik3r1	phosphoinositide-3-kinase regulatory subunit 1 [Source:MGI Symbol;Acc:MGI:97583]	GO:0034976	response to endoplasmic reticulum stress
Pik3r1	phosphoinositide-3-kinase regulatory subunit 1 [Source:MGI Symbol;Acc:MGI:97583]	GO:0042307	positive regulation of protein import into nucleus
Pik3r1	phosphoinositide-3-kinase regulatory subunit 1 [Source:MGI Symbol;Acc:MGI:97583]	GO:0022408	negative regulation of cell-cell adhesion
Pik3r1	phosphoinositide-3-kinase regulatory subunit 1 [Source:MGI Symbol;Acc:MGI:97583]	GO:0008630	intrinsic apoptotic signaling pathway in response to DNA damage
Pik3r1	phosphoinositide-3-kinase regulatory subunit 1 [Source:MGI Symbol;Acc:MGI:97583]	GO:0005102	signaling receptor binding
Pik3r1	phosphoinositide-3-kinase regulatory subunit 1 [Source:MGI Symbol;Acc:MGI:97583]	GO:0048662	negative regulation of smooth muscle cell proliferation
Pik3r1	phosphoinositide-3-kinase regulatory subunit 1 [Source:MGI Symbol;Acc:MGI:97583]	GO:0045671	negative regulation of osteoclast differentiation
Pik3r1	phosphoinositide-3-kinase regulatory subunit 1 [Source:MGI Symbol;Acc:MGI:97583]	GO:0048009	insulin-like growth factor receptor signaling pathway
Pik3r1	phosphoinositide-3-kinase regulatory subunit 1 [Source:MGI Symbol;Acc:MGI:97583]	GO:0051492	regulation of stress fiber assembly
Pik3r1	phosphoinositide-3-kinase regulatory subunit 1 [Source:MGI Symbol;Acc:MGI:97583]	GO:1903076	regulation of protein localization to plasma membrane
Pik3r1	phosphoinositide-3-kinase regulatory subunit 1 [Source:MGI Symbol;Acc:MGI:97583]	GO:0036312	phosphatidylinositol 3-kinase regulatory subunit binding
Pik3r1	phosphoinositide-3-kinase regulatory subunit 1 [Source:MGI Symbol;Acc:MGI:97583]	GO:0046982	protein heterodimerization activity
Pik3r1	phosphoinositide-3-kinase regulatory subunit 1 [Source:MGI Symbol;Acc:MGI:97583]	GO:0001678	intracellular glucose homeostasis
Pik3r1	phosphoinositide-3-kinase regulatory subunit 1 [Source:MGI Symbol;Acc:MGI:97583]	GO:0051117	ATPase binding
Pik3r1	phosphoinositide-3-kinase regulatory subunit 1 [Source:MGI Symbol;Acc:MGI:97583]	GO:0045776	negative regulation of blood pressure
Pik3r1	phosphoinositide-3-kinase regulatory subunit 1 [Source:MGI Symbol;Acc:MGI:97583]	GO:0030331	nuclear estrogen receptor binding
Pik3r1	phosphoinositide-3-kinase regulatory subunit 1 [Source:MGI Symbol;Acc:MGI:97583]	GO:0051591	response to cAMP
Pik3r1	phosphoinositide-3-kinase regulatory subunit 1 [Source:MGI Symbol;Acc:MGI:97583]	GO:0031625	ubiquitin protein ligase binding
Pik3r1	phosphoinositide-3-kinase regulatory subunit 1 [Source:MGI Symbol;Acc:MGI:97583]	GO:0005159	insulin-like growth factor receptor binding
Pik3r1	phosphoinositide-3-kinase regulatory subunit 1 [Source:MGI Symbol;Acc:MGI:97583]	GO:0002687	positive regulation of leukocyte migration
Pik3r1	phosphoinositide-3-kinase regulatory subunit 1 [Source:MGI Symbol;Acc:MGI:97583]	GO:0051219	phosphoprotein binding
Pik3r1	phosphoinositide-3-kinase regulatory subunit 1 [Source:MGI Symbol;Acc:MGI:97583]	GO:0045663	positive regulation of myoblast differentiation
Pik3r1	phosphoinositide-3-kinase regulatory subunit 1 [Source:MGI Symbol;Acc:MGI:97583]	GO:0010656	negative regulation of muscle cell apoptotic process
Pik3r1	phosphoinositide-3-kinase regulatory subunit 1 [Source:MGI Symbol;Acc:MGI:97583]	GO:0019209	kinase activator activity
Pik3r1	phosphoinositide-3-kinase regulatory subunit 1 [Source:MGI Symbol;Acc:MGI:97583]	GO:0008625	extrinsic apoptotic signaling pathway via death domain receptors
Pik3r1	phosphoinositide-3-kinase regulatory subunit 1 [Source:MGI Symbol;Acc:MGI:97583]	GO:0034644	cellular response to UV
Pik3r1	phosphoinositide-3-kinase regulatory subunit 1 [Source:MGI Symbol;Acc:MGI:97583]	GO:0045861	negative regulation of proteolysis
Pik3r1	phosphoinositide-3-kinase regulatory subunit 1 [Source:MGI Symbol;Acc:MGI:97583]	GO:0097529	myeloid leukocyte migration
Pik3r1	phosphoinositide-3-kinase regulatory subunit 1 [Source:MGI Symbol;Acc:MGI:97583]	GO:0043560	insulin receptor substrate binding
Pik3r1	phosphoinositide-3-kinase regulatory subunit 1 [Source:MGI Symbol;Acc:MGI:97583]	GO:0007162	negative regulation of cell adhesion
Pik3r1	phosphoinositide-3-kinase regulatory subunit 1 [Source:MGI Symbol;Acc:MGI:97583]	GO:0001953	negative regulation of cell-matrix adhesion
Pik3r1	phosphoinositide-3-kinase regulatory subunit 1 [Source:MGI Symbol;Acc:MGI:97583]	GO:0016303	1-phosphatidylinositol-3-kinase activity
Pik3r1	phosphoinositide-3-kinase regulatory subunit 1 [Source:MGI Symbol;Acc:MGI:97583]	GO:0001784	phosphotyrosine residue binding
Pik3r1	phosphoinositide-3-kinase regulatory subunit 1 [Source:MGI Symbol;Acc:MGI:97583]	GO:0005158	insulin receptor binding
Pik3r1	phosphoinositide-3-kinase regulatory subunit 1 [Source:MGI Symbol;Acc:MGI:97583]	GO:0005168	neurotrophin TRKA receptor binding
Pik3r1	phosphoinositide-3-kinase regulatory subunit 1 [Source:MGI Symbol;Acc:MGI:97583]	GO:0019903	protein phosphatase binding
Pik3r1	phosphoinositide-3-kinase regulatory subunit 1 [Source:MGI Symbol;Acc:MGI:97583]	GO:0035014	phosphatidylinositol 3-kinase regulator activity
Pik3r1	phosphoinositide-3-kinase regulatory subunit 1 [Source:MGI Symbol;Acc:MGI:97583]	GO:0043125	ErbB-3 class receptor binding
Pik3r1	phosphoinositide-3-kinase regulatory subunit 1 [Source:MGI Symbol;Acc:MGI:97583]	GO:0043559	insulin binding
Pik3r1	phosphoinositide-3-kinase regulatory subunit 1 [Source:MGI Symbol;Acc:MGI:97583]	GO:0010592	positive regulation of lamellipodium assembly
Pik3r1	phosphoinositide-3-kinase regulatory subunit 1 [Source:MGI Symbol;Acc:MGI:97583]	GO:0019221	cytokine-mediated signaling pathway
Pik3r1	phosphoinositide-3-kinase regulatory subunit 1 [Source:MGI Symbol;Acc:MGI:97583]	GO:0034143	regulation of toll-like receptor 4 signaling pathway
Pik3r1	phosphoinositide-3-kinase regulatory subunit 1 [Source:MGI Symbol;Acc:MGI:97583]	GO:0035655	interleukin-18-mediated signaling pathway
Pik3r1	phosphoinositide-3-kinase regulatory subunit 1 [Source:MGI Symbol;Acc:MGI:97583]	GO:0042267	natural killer cell mediated cytotoxicity
Pik3r1	phosphoinositide-3-kinase regulatory subunit 1 [Source:MGI Symbol;Acc:MGI:97583]	GO:0043491	phosphatidylinositol 3-kinase/protein kinase B signal transduction
Pik3r1	phosphoinositide-3-kinase regulatory subunit 1 [Source:MGI Symbol;Acc:MGI:97583]	GO:0048661	positive regulation of smooth muscle cell proliferation
Pik3r1	phosphoinositide-3-kinase regulatory subunit 1 [Source:MGI Symbol;Acc:MGI:97583]	GO:0051491	positive regulation of filopodium assembly
Pik3r1	phosphoinositide-3-kinase regulatory subunit 1 [Source:MGI Symbol;Acc:MGI:97583]	GO:0051497	negative regulation of stress fiber assembly
Pik3r1	phosphoinositide-3-kinase regulatory subunit 1 [Source:MGI Symbol;Acc:MGI:97583]	GO:0060396	growth hormone receptor signaling pathway
Pik3r1	phosphoinositide-3-kinase regulatory subunit 1 [Source:MGI Symbol;Acc:MGI:97583]	GO:0120183	positive regulation of focal adhesion disassembly
Pik3r1	phosphoinositide-3-kinase regulatory subunit 1 [Source:MGI Symbol;Acc:MGI:97583]	GO:1900103	positive regulation of endoplasmic reticulum unfolded protein response
Pik3r1	phosphoinositide-3-kinase regulatory subunit 1 [Source:MGI Symbol;Acc:MGI:97583]	GO:1990578	perinuclear endoplasmic reticulum membrane
Pik3r1	phosphoinositide-3-kinase regulatory subunit 1 [Source:MGI Symbol;Acc:MGI:97583]	GO:0005943	phosphatidylinositol 3-kinase complex, class IA
Pik3r1	phosphoinositide-3-kinase regulatory subunit 1 [Source:MGI Symbol;Acc:MGI:97583]	GO:0016301	kinase activity
Pik3r1	phosphoinositide-3-kinase regulatory subunit 1 [Source:MGI Symbol;Acc:MGI:97583]
Slc2a1	solute carrier family 2 (facilitated glucose transporter), member 1 [Source:MGI Symbol;Acc:MGI:95755]	GO:0016020	membrane
Slc2a1	solute carrier family 2 (facilitated glucose transporter), member 1 [Source:MGI Symbol;Acc:MGI:95755]	GO:0022857	transmembrane transporter activity
Slc2a1	solute carrier family 2 (facilitated glucose transporter), member 1 [Source:MGI Symbol;Acc:MGI:95755]	GO:0055085	transmembrane transport
Slc2a1	solute carrier family 2 (facilitated glucose transporter), member 1 [Source:MGI Symbol;Acc:MGI:95755]	GO:1904659	glucose transmembrane transport
Slc2a1	solute carrier family 2 (facilitated glucose transporter), member 1 [Source:MGI Symbol;Acc:MGI:95755]	GO:0005355	glucose transmembrane transporter activity
Slc2a1	solute carrier family 2 (facilitated glucose transporter), member 1 [Source:MGI Symbol;Acc:MGI:95755]	GO:0005515	protein binding
Slc2a1	solute carrier family 2 (facilitated glucose transporter), member 1 [Source:MGI Symbol;Acc:MGI:95755]	GO:0045202	synapse
Slc2a1	solute carrier family 2 (facilitated glucose transporter), member 1 [Source:MGI Symbol;Acc:MGI:95755]	GO:0005829	cytosol
Slc2a1	solute carrier family 2 (facilitated glucose transporter), member 1 [Source:MGI Symbol;Acc:MGI:95755]	GO:0005737	cytoplasm
Slc2a1	solute carrier family 2 (facilitated glucose transporter), member 1 [Source:MGI Symbol;Acc:MGI:95755]	GO:0005886	plasma membrane
Slc2a1	solute carrier family 2 (facilitated glucose transporter), member 1 [Source:MGI Symbol;Acc:MGI:95755]	GO:0016323	basolateral plasma membrane
Slc2a1	solute carrier family 2 (facilitated glucose transporter), member 1 [Source:MGI Symbol;Acc:MGI:95755]	GO:0016324	apical plasma membrane
Slc2a1	solute carrier family 2 (facilitated glucose transporter), member 1 [Source:MGI Symbol;Acc:MGI:95755]	GO:0005911	cell-cell junction
Slc2a1	solute carrier family 2 (facilitated glucose transporter), member 1 [Source:MGI Symbol;Acc:MGI:95755]	GO:0042383	sarcolemma
Slc2a1	solute carrier family 2 (facilitated glucose transporter), member 1 [Source:MGI Symbol;Acc:MGI:95755]	GO:0001917	photoreceptor inner segment
Slc2a1	solute carrier family 2 (facilitated glucose transporter), member 1 [Source:MGI Symbol;Acc:MGI:95755]	GO:0001674	female germ cell nucleus
Slc2a1	solute carrier family 2 (facilitated glucose transporter), member 1 [Source:MGI Symbol;Acc:MGI:95755]	GO:0030018	Z disc
Slc2a1	solute carrier family 2 (facilitated glucose transporter), member 1 [Source:MGI Symbol;Acc:MGI:95755]	GO:0019900	kinase binding
Slc2a1	solute carrier family 2 (facilitated glucose transporter), member 1 [Source:MGI Symbol;Acc:MGI:95755]	GO:0000139	Golgi membrane
Slc2a1	solute carrier family 2 (facilitated glucose transporter), member 1 [Source:MGI Symbol;Acc:MGI:95755]	GO:0015149	hexose transmembrane transporter activity
Slc2a1	solute carrier family 2 (facilitated glucose transporter), member 1 [Source:MGI Symbol;Acc:MGI:95755]	GO:0098793	presynapse
Slc2a1	solute carrier family 2 (facilitated glucose transporter), member 1 [Source:MGI Symbol;Acc:MGI:95755]	GO:0030864	cortical actin cytoskeleton
Slc2a1	solute carrier family 2 (facilitated glucose transporter), member 1 [Source:MGI Symbol;Acc:MGI:95755]	GO:0005901	caveola
Slc2a1	solute carrier family 2 (facilitated glucose transporter), member 1 [Source:MGI Symbol;Acc:MGI:95755]	GO:0014704	intercalated disc
Slc2a1	solute carrier family 2 (facilitated glucose transporter), member 1 [Source:MGI Symbol;Acc:MGI:95755]	GO:0045121	membrane raft
Slc2a1	solute carrier family 2 (facilitated glucose transporter), member 1 [Source:MGI Symbol;Acc:MGI:95755]	GO:0031982	vesicle
Slc2a1	solute carrier family 2 (facilitated glucose transporter), member 1 [Source:MGI Symbol;Acc:MGI:95755]	GO:0046323	glucose import
Slc2a1	solute carrier family 2 (facilitated glucose transporter), member 1 [Source:MGI Symbol;Acc:MGI:95755]	GO:0042910	xenobiotic transmembrane transporter activity
Slc2a1	solute carrier family 2 (facilitated glucose transporter), member 1 [Source:MGI Symbol;Acc:MGI:95755]	GO:0042908	xenobiotic transport
Slc2a1	solute carrier family 2 (facilitated glucose transporter), member 1 [Source:MGI Symbol;Acc:MGI:95755]	GO:0065003	protein-containing complex assembly
Slc2a1	solute carrier family 2 (facilitated glucose transporter), member 1 [Source:MGI Symbol;Acc:MGI:95755]	GO:0042149	cellular response to glucose starvation
Slc2a1	solute carrier family 2 (facilitated glucose transporter), member 1 [Source:MGI Symbol;Acc:MGI:95755]	GO:0055056	D-glucose transmembrane transporter activity
Slc2a1	solute carrier family 2 (facilitated glucose transporter), member 1 [Source:MGI Symbol;Acc:MGI:95755]	GO:0070837	dehydroascorbic acid transport
Slc2a1	solute carrier family 2 (facilitated glucose transporter), member 1 [Source:MGI Symbol;Acc:MGI:95755]	GO:0033300	dehydroascorbic acid transmembrane transporter activity
Slc2a1	solute carrier family 2 (facilitated glucose transporter), member 1 [Source:MGI Symbol;Acc:MGI:95755]	GO:0045494	photoreceptor cell maintenance
Slc2a1	solute carrier family 2 (facilitated glucose transporter), member 1 [Source:MGI Symbol;Acc:MGI:95755]	GO:0005324	long-chain fatty acid transmembrane transporter activity
Slc2a1	solute carrier family 2 (facilitated glucose transporter), member 1 [Source:MGI Symbol;Acc:MGI:95755]	GO:0042802	identical protein binding
Slc2a1	solute carrier family 2 (facilitated glucose transporter), member 1 [Source:MGI Symbol;Acc:MGI:95755]	GO:0001666	response to hypoxia
Slc2a1	solute carrier family 2 (facilitated glucose transporter), member 1 [Source:MGI Symbol;Acc:MGI:95755]	GO:0007417	central nervous system development
Slc2a1	solute carrier family 2 (facilitated glucose transporter), member 1 [Source:MGI Symbol;Acc:MGI:95755]	GO:0007565	female pregnancy
Slc2a1	solute carrier family 2 (facilitated glucose transporter), member 1 [Source:MGI Symbol;Acc:MGI:95755]	GO:0015911	long-chain fatty acid import across plasma membrane
Slc2a1	solute carrier family 2 (facilitated glucose transporter), member 1 [Source:MGI Symbol;Acc:MGI:95755]	GO:0021987	cerebral cortex development
Slc2a1	solute carrier family 2 (facilitated glucose transporter), member 1 [Source:MGI Symbol;Acc:MGI:95755]	GO:0032868	response to insulin
Slc2a1	solute carrier family 2 (facilitated glucose transporter), member 1 [Source:MGI Symbol;Acc:MGI:95755]	GO:0071260	cellular response to mechanical stimulus
Slc2a1	solute carrier family 2 (facilitated glucose transporter), member 1 [Source:MGI Symbol;Acc:MGI:95755]	GO:0071474	cellular hyperosmotic response
Slc2a1	solute carrier family 2 (facilitated glucose transporter), member 1 [Source:MGI Symbol;Acc:MGI:95755]	GO:0098708	glucose import across plasma membrane
Slc2a1	solute carrier family 2 (facilitated glucose transporter), member 1 [Source:MGI Symbol;Acc:MGI:95755]	GO:0150104	transport across blood-brain barrier
Slc2a1	solute carrier family 2 (facilitated glucose transporter), member 1 [Source:MGI Symbol;Acc:MGI:95755]	GO:1904016	response to Thyroglobulin triiodothyronine
Slc2a1	solute carrier family 2 (facilitated glucose transporter), member 1 [Source:MGI Symbol;Acc:MGI:95755]	GO:0001939	female pronucleus
Slc2a1	solute carrier family 2 (facilitated glucose transporter), member 1 [Source:MGI Symbol;Acc:MGI:95755]	GO:0030496	midbody
Slc2a1	solute carrier family 2 (facilitated glucose transporter), member 1 [Source:MGI Symbol;Acc:MGI:95755]	GO:1990350	glucose transporter complex
Slc2a1	solute carrier family 2 (facilitated glucose transporter), member 1 [Source:MGI Symbol;Acc:MGI:95755]	GO:0008645	hexose transmembrane transport
Musk	muscle, skeletal, receptor tyrosine kinase [Source:MGI Symbol;Acc:MGI:103581]	GO:0005524	ATP binding
Musk	muscle, skeletal, receptor tyrosine kinase [Source:MGI Symbol;Acc:MGI:103581]	GO:0005515	protein binding
Musk	muscle, skeletal, receptor tyrosine kinase [Source:MGI Symbol;Acc:MGI:103581]	GO:0004672	protein kinase activity
Musk	muscle, skeletal, receptor tyrosine kinase [Source:MGI Symbol;Acc:MGI:103581]	GO:0006468	protein phosphorylation
Musk	muscle, skeletal, receptor tyrosine kinase [Source:MGI Symbol;Acc:MGI:103581]	GO:0004713	protein tyrosine kinase activity
Musk	muscle, skeletal, receptor tyrosine kinase [Source:MGI Symbol;Acc:MGI:103581]	GO:0046872	metal ion binding
Musk	muscle, skeletal, receptor tyrosine kinase [Source:MGI Symbol;Acc:MGI:103581]	GO:0005886	plasma membrane
Musk	muscle, skeletal, receptor tyrosine kinase [Source:MGI Symbol;Acc:MGI:103581]	GO:0045202	synapse
Musk	muscle, skeletal, receptor tyrosine kinase [Source:MGI Symbol;Acc:MGI:103581]	GO:0004714	transmembrane receptor protein tyrosine kinase activity
Musk	muscle, skeletal, receptor tyrosine kinase [Source:MGI Symbol;Acc:MGI:103581]	GO:0007528	neuromuscular junction development
Musk	muscle, skeletal, receptor tyrosine kinase [Source:MGI Symbol;Acc:MGI:103581]	GO:0043235	receptor complex
Musk	muscle, skeletal, receptor tyrosine kinase [Source:MGI Symbol;Acc:MGI:103581]	GO:0060291	long-term synaptic potentiation
Musk	muscle, skeletal, receptor tyrosine kinase [Source:MGI Symbol;Acc:MGI:103581]	GO:0010629	negative regulation of gene expression
Musk	muscle, skeletal, receptor tyrosine kinase [Source:MGI Symbol;Acc:MGI:103581]	GO:0010628	positive regulation of gene expression
Musk	muscle, skeletal, receptor tyrosine kinase [Source:MGI Symbol;Acc:MGI:103581]	GO:0009897	external side of plasma membrane
Musk	muscle, skeletal, receptor tyrosine kinase [Source:MGI Symbol;Acc:MGI:103581]	GO:0030154	cell differentiation
Musk	muscle, skeletal, receptor tyrosine kinase [Source:MGI Symbol;Acc:MGI:103581]	GO:0045211	postsynaptic membrane
Musk	muscle, skeletal, receptor tyrosine kinase [Source:MGI Symbol;Acc:MGI:103581]	GO:0016020	membrane
Musk	muscle, skeletal, receptor tyrosine kinase [Source:MGI Symbol;Acc:MGI:103581]	GO:0001934	positive regulation of protein phosphorylation
Musk	muscle, skeletal, receptor tyrosine kinase [Source:MGI Symbol;Acc:MGI:103581]	GO:0007613	memory
Musk	muscle, skeletal, receptor tyrosine kinase [Source:MGI Symbol;Acc:MGI:103581]	GO:0031594	neuromuscular junction
Musk	muscle, skeletal, receptor tyrosine kinase [Source:MGI Symbol;Acc:MGI:103581]	GO:0019901	protein kinase binding
Musk	muscle, skeletal, receptor tyrosine kinase [Source:MGI Symbol;Acc:MGI:103581]	GO:0050731	positive regulation of peptidyl-tyrosine phosphorylation
Musk	muscle, skeletal, receptor tyrosine kinase [Source:MGI Symbol;Acc:MGI:103581]	GO:0006355	regulation of DNA-templated transcription
Musk	muscle, skeletal, receptor tyrosine kinase [Source:MGI Symbol;Acc:MGI:103581]	GO:0035022	positive regulation of Rac protein signal transduction
Musk	muscle, skeletal, receptor tyrosine kinase [Source:MGI Symbol;Acc:MGI:103581]	GO:0097049	motor neuron apoptotic process
Musk	muscle, skeletal, receptor tyrosine kinase [Source:MGI Symbol;Acc:MGI:103581]	GO:0043113	receptor clustering
Musk	muscle, skeletal, receptor tyrosine kinase [Source:MGI Symbol;Acc:MGI:103581]	GO:2000673	positive regulation of motor neuron apoptotic process
Musk	muscle, skeletal, receptor tyrosine kinase [Source:MGI Symbol;Acc:MGI:103581]	GO:0007167	enzyme-linked receptor protein signaling pathway
Musk	muscle, skeletal, receptor tyrosine kinase [Source:MGI Symbol;Acc:MGI:103581]	GO:1904395	positive regulation of skeletal muscle acetylcholine-gated channel clustering
Musk	muscle, skeletal, receptor tyrosine kinase [Source:MGI Symbol;Acc:MGI:103581]	GO:2000541	positive regulation of protein geranylgeranylation
Musk	muscle, skeletal, receptor tyrosine kinase [Source:MGI Symbol;Acc:MGI:103581]	GO:0017147	Wnt-protein binding
Musk	muscle, skeletal, receptor tyrosine kinase [Source:MGI Symbol;Acc:MGI:103581]	GO:0042995	cell projection
Musk	muscle, skeletal, receptor tyrosine kinase [Source:MGI Symbol;Acc:MGI:103581]	GO:0030165	PDZ domain binding
Musk	muscle, skeletal, receptor tyrosine kinase [Source:MGI Symbol;Acc:MGI:103581]	GO:0008582	regulation of synaptic assembly at neuromuscular junction
Musk	muscle, skeletal, receptor tyrosine kinase [Source:MGI Symbol;Acc:MGI:103581]	GO:0051602	response to electrical stimulus
Musk	muscle, skeletal, receptor tyrosine kinase [Source:MGI Symbol;Acc:MGI:103581]	GO:0032224	positive regulation of synaptic transmission, cholinergic
Musk	muscle, skeletal, receptor tyrosine kinase [Source:MGI Symbol;Acc:MGI:103581]	GO:0051897	positive regulation of phosphatidylinositol 3-kinase/protein kinase B signal transduction
Musk	muscle, skeletal, receptor tyrosine kinase [Source:MGI Symbol;Acc:MGI:103581]	GO:0010976	positive regulation of neuron projection development
Musk	muscle, skeletal, receptor tyrosine kinase [Source:MGI Symbol;Acc:MGI:103581]	GO:0071340	skeletal muscle acetylcholine-gated channel clustering
Musk	muscle, skeletal, receptor tyrosine kinase [Source:MGI Symbol;Acc:MGI:103581]	GO:0045887	positive regulation of synaptic assembly at neuromuscular junction
Musk	muscle, skeletal, receptor tyrosine kinase [Source:MGI Symbol;Acc:MGI:103581]
Ehd1	EH-domain containing 1 [Source:MGI Symbol;Acc:MGI:1341878]	GO:0005515	protein binding
Ehd1	EH-domain containing 1 [Source:MGI Symbol;Acc:MGI:1341878]	GO:0005525	GTP binding
Ehd1	EH-domain containing 1 [Source:MGI Symbol;Acc:MGI:1341878]	GO:0005509	calcium ion binding
Ehd1	EH-domain containing 1 [Source:MGI Symbol;Acc:MGI:1341878]	GO:0010976	positive regulation of neuron projection development
Ehd1	EH-domain containing 1 [Source:MGI Symbol;Acc:MGI:1341878]	GO:0005737	cytoplasm
Ehd1	EH-domain containing 1 [Source:MGI Symbol;Acc:MGI:1341878]	GO:0046872	metal ion binding
Ehd1	EH-domain containing 1 [Source:MGI Symbol;Acc:MGI:1341878]	GO:0005886	plasma membrane
Ehd1	EH-domain containing 1 [Source:MGI Symbol;Acc:MGI:1341878]	GO:0005524	ATP binding
Ehd1	EH-domain containing 1 [Source:MGI Symbol;Acc:MGI:1341878]	GO:0005768	endosome
Ehd1	EH-domain containing 1 [Source:MGI Symbol;Acc:MGI:1341878]	GO:0015031	protein transport
Ehd1	EH-domain containing 1 [Source:MGI Symbol;Acc:MGI:1341878]	GO:0030030	cell projection organization
Ehd1	EH-domain containing 1 [Source:MGI Symbol;Acc:MGI:1341878]	GO:0005929	cilium
Ehd1	EH-domain containing 1 [Source:MGI Symbol;Acc:MGI:1341878]	GO:0060271	cilium assembly
Ehd1	EH-domain containing 1 [Source:MGI Symbol;Acc:MGI:1341878]	GO:0010008	endosome membrane
Ehd1	EH-domain containing 1 [Source:MGI Symbol;Acc:MGI:1341878]	GO:0006886	intracellular protein transport
Ehd1	EH-domain containing 1 [Source:MGI Symbol;Acc:MGI:1341878]	GO:0031901	early endosome membrane
Ehd1	EH-domain containing 1 [Source:MGI Symbol;Acc:MGI:1341878]	GO:0060170	ciliary membrane
Ehd1	EH-domain containing 1 [Source:MGI Symbol;Acc:MGI:1341878]	GO:0043209	myelin sheath
Ehd1	EH-domain containing 1 [Source:MGI Symbol;Acc:MGI:1341878]	GO:0048471	perinuclear region of cytoplasm
Ehd1	EH-domain containing 1 [Source:MGI Symbol;Acc:MGI:1341878]	GO:1990090	cellular response to nerve growth factor stimulus
Ehd1	EH-domain containing 1 [Source:MGI Symbol;Acc:MGI:1341878]	GO:0030139	endocytic vesicle
Ehd1	EH-domain containing 1 [Source:MGI Symbol;Acc:MGI:1341878]	GO:0055038	recycling endosome membrane
Ehd1	EH-domain containing 1 [Source:MGI Symbol;Acc:MGI:1341878]	GO:0031175	neuron projection development
Ehd1	EH-domain containing 1 [Source:MGI Symbol;Acc:MGI:1341878]	GO:0005769	early endosome
Ehd1	EH-domain containing 1 [Source:MGI Symbol;Acc:MGI:1341878]	GO:0072659	protein localization to plasma membrane
Ehd1	EH-domain containing 1 [Source:MGI Symbol;Acc:MGI:1341878]	GO:0032456	endocytic recycling
Ehd1	EH-domain containing 1 [Source:MGI Symbol;Acc:MGI:1341878]	GO:0006897	endocytosis
Ehd1	EH-domain containing 1 [Source:MGI Symbol;Acc:MGI:1341878]	GO:0016197	endosomal transport
Ehd1	EH-domain containing 1 [Source:MGI Symbol;Acc:MGI:1341878]	GO:1901741	positive regulation of myoblast fusion
Ehd1	EH-domain containing 1 [Source:MGI Symbol;Acc:MGI:1341878]	GO:0005811	lipid droplet
Ehd1	EH-domain containing 1 [Source:MGI Symbol;Acc:MGI:1341878]	GO:0061512	protein localization to cilium
Ehd1	EH-domain containing 1 [Source:MGI Symbol;Acc:MGI:1341878]	GO:0042632	cholesterol homeostasis
Ehd1	EH-domain containing 1 [Source:MGI Symbol;Acc:MGI:1341878]	GO:0010886	positive regulation of cholesterol storage
Ehd1	EH-domain containing 1 [Source:MGI Symbol;Acc:MGI:1341878]	GO:0034383	low-density lipoprotein particle clearance
Ehd1	EH-domain containing 1 [Source:MGI Symbol;Acc:MGI:1341878]	GO:2001137	positive regulation of endocytic recycling
Ehd1	EH-domain containing 1 [Source:MGI Symbol;Acc:MGI:1341878]	GO:0031267	small GTPase binding
Ehd1	EH-domain containing 1 [Source:MGI Symbol;Acc:MGI:1341878]	GO:0042802	identical protein binding
Ehd1	EH-domain containing 1 [Source:MGI Symbol;Acc:MGI:1341878]	GO:0051260	protein homooligomerization
Ehd1	EH-domain containing 1 [Source:MGI Symbol;Acc:MGI:1341878]	GO:0020018	ciliary pocket membrane
Ehd1	EH-domain containing 1 [Source:MGI Symbol;Acc:MGI:1341878]	GO:0048786	presynaptic active zone
Ehd1	EH-domain containing 1 [Source:MGI Symbol;Acc:MGI:1341878]	GO:0098978	glutamatergic synapse
Ehd1	EH-domain containing 1 [Source:MGI Symbol;Acc:MGI:1341878]	GO:0031095	platelet dense tubular network membrane
Ehd1	EH-domain containing 1 [Source:MGI Symbol;Acc:MGI:1341878]
Nt5e	5' nucleotidase, ecto [Source:MGI Symbol;Acc:MGI:99782]	GO:0046872	metal ion binding
Nt5e	5' nucleotidase, ecto [Source:MGI Symbol;Acc:MGI:99782]	GO:0016787	hydrolase activity
Nt5e	5' nucleotidase, ecto [Source:MGI Symbol;Acc:MGI:99782]	GO:0000166	nucleotide binding
Nt5e	5' nucleotidase, ecto [Source:MGI Symbol;Acc:MGI:99782]	GO:0016788	hydrolase activity, acting on ester bonds
Nt5e	5' nucleotidase, ecto [Source:MGI Symbol;Acc:MGI:99782]	GO:0009166	nucleotide catabolic process
Nt5e	5' nucleotidase, ecto [Source:MGI Symbol;Acc:MGI:99782]	GO:0050728	negative regulation of inflammatory response
Nt5e	5' nucleotidase, ecto [Source:MGI Symbol;Acc:MGI:99782]	GO:0016020	membrane
Nt5e	5' nucleotidase, ecto [Source:MGI Symbol;Acc:MGI:99782]	GO:0005886	plasma membrane
Nt5e	5' nucleotidase, ecto [Source:MGI Symbol;Acc:MGI:99782]	GO:0009897	external side of plasma membrane
Nt5e	5' nucleotidase, ecto [Source:MGI Symbol;Acc:MGI:99782]	GO:0098552	side of membrane
Nt5e	5' nucleotidase, ecto [Source:MGI Symbol;Acc:MGI:99782]	GO:0009986	cell surface
Nt5e	5' nucleotidase, ecto [Source:MGI Symbol;Acc:MGI:99782]	GO:0106411	XMP 5'-nucleosidase activity
Nt5e	5' nucleotidase, ecto [Source:MGI Symbol;Acc:MGI:99782]	GO:0055074	calcium ion homeostasis
Nt5e	5' nucleotidase, ecto [Source:MGI Symbol;Acc:MGI:99782]	GO:0008253	5'-nucleotidase activity
Nt5e	5' nucleotidase, ecto [Source:MGI Symbol;Acc:MGI:99782]	GO:0046034	ATP metabolic process
Nt5e	5' nucleotidase, ecto [Source:MGI Symbol;Acc:MGI:99782]	GO:0050483	IMP 5'-nucleotidase activity
Nt5e	5' nucleotidase, ecto [Source:MGI Symbol;Acc:MGI:99782]	GO:0006196	AMP catabolic process
Nt5e	5' nucleotidase, ecto [Source:MGI Symbol;Acc:MGI:99782]	GO:0046085	adenosine metabolic process
Nt5e	5' nucleotidase, ecto [Source:MGI Symbol;Acc:MGI:99782]	GO:0097060	synaptic membrane
Nt5e	5' nucleotidase, ecto [Source:MGI Symbol;Acc:MGI:99782]	GO:0046032	ADP catabolic process
Nt5e	5' nucleotidase, ecto [Source:MGI Symbol;Acc:MGI:99782]	GO:0140928	inhibition of non-skeletal tissue mineralization
Nt5e	5' nucleotidase, ecto [Source:MGI Symbol;Acc:MGI:99782]	GO:0033198	response to ATP
Nt5e	5' nucleotidase, ecto [Source:MGI Symbol;Acc:MGI:99782]	GO:0008198	ferrous iron binding
Nt5e	5' nucleotidase, ecto [Source:MGI Symbol;Acc:MGI:99782]	GO:0002953	5'-deoxynucleotidase activity
Nt5e	5' nucleotidase, ecto [Source:MGI Symbol;Acc:MGI:99782]	GO:0008252	nucleotidase activity
Nt5e	5' nucleotidase, ecto [Source:MGI Symbol;Acc:MGI:99782]	GO:0008270	zinc ion binding
Nt5e	5' nucleotidase, ecto [Source:MGI Symbol;Acc:MGI:99782]	GO:0042802	identical protein binding
Nt5e	5' nucleotidase, ecto [Source:MGI Symbol;Acc:MGI:99782]	GO:0050340	thymidylate 5'-phosphatase activity
Nt5e	5' nucleotidase, ecto [Source:MGI Symbol;Acc:MGI:99782]	GO:0050484	GMP 5'-nucleotidase activity
Nt5e	5' nucleotidase, ecto [Source:MGI Symbol;Acc:MGI:99782]	GO:0007159	leukocyte cell-cell adhesion
Nt5e	5' nucleotidase, ecto [Source:MGI Symbol;Acc:MGI:99782]	GO:0005654	nucleoplasm
Nt5e	5' nucleotidase, ecto [Source:MGI Symbol;Acc:MGI:99782]	GO:0005829	cytosol
Nt5e	5' nucleotidase, ecto [Source:MGI Symbol;Acc:MGI:99782]	GO:0046086	adenosine biosynthetic process
Nt5e	5' nucleotidase, ecto [Source:MGI Symbol;Acc:MGI:99782]
Stat3	signal transducer and activator of transcription 3 [Source:MGI Symbol;Acc:MGI:103038]	GO:0003677	DNA binding
Stat3	signal transducer and activator of transcription 3 [Source:MGI Symbol;Acc:MGI:103038]	GO:0006355	regulation of DNA-templated transcription
Stat3	signal transducer and activator of transcription 3 [Source:MGI Symbol;Acc:MGI:103038]	GO:0007165	signal transduction
Stat3	signal transducer and activator of transcription 3 [Source:MGI Symbol;Acc:MGI:103038]	GO:0003700	DNA-binding transcription factor activity
Stat3	signal transducer and activator of transcription 3 [Source:MGI Symbol;Acc:MGI:103038]	GO:0010467	gene expression
Stat3	signal transducer and activator of transcription 3 [Source:MGI Symbol;Acc:MGI:103038]	GO:0005634	nucleus
Stat3	signal transducer and activator of transcription 3 [Source:MGI Symbol;Acc:MGI:103038]	GO:0043565	sequence-specific DNA binding
Stat3	signal transducer and activator of transcription 3 [Source:MGI Symbol;Acc:MGI:103038]	GO:0045944	positive regulation of transcription by RNA polymerase II
Stat3	signal transducer and activator of transcription 3 [Source:MGI Symbol;Acc:MGI:103038]	GO:0005515	protein binding
Stat3	signal transducer and activator of transcription 3 [Source:MGI Symbol;Acc:MGI:103038]	GO:0008284	positive regulation of cell population proliferation
Stat3	signal transducer and activator of transcription 3 [Source:MGI Symbol;Acc:MGI:103038]	GO:0006954	inflammatory response
Stat3	signal transducer and activator of transcription 3 [Source:MGI Symbol;Acc:MGI:103038]	GO:0002931	response to ischemia
Stat3	signal transducer and activator of transcription 3 [Source:MGI Symbol;Acc:MGI:103038]	GO:0097398	cellular response to interleukin-17
Stat3	signal transducer and activator of transcription 3 [Source:MGI Symbol;Acc:MGI:103038]	GO:0014069	postsynaptic density
Stat3	signal transducer and activator of transcription 3 [Source:MGI Symbol;Acc:MGI:103038]	GO:2000737	negative regulation of stem cell differentiation
Stat3	signal transducer and activator of transcription 3 [Source:MGI Symbol;Acc:MGI:103038]	GO:0008285	negative regulation of cell population proliferation
Stat3	signal transducer and activator of transcription 3 [Source:MGI Symbol;Acc:MGI:103038]	GO:0005829	cytosol
Stat3	signal transducer and activator of transcription 3 [Source:MGI Symbol;Acc:MGI:103038]	GO:0005737	cytoplasm
Stat3	signal transducer and activator of transcription 3 [Source:MGI Symbol;Acc:MGI:103038]	GO:0006366	transcription by RNA polymerase II
Stat3	signal transducer and activator of transcription 3 [Source:MGI Symbol;Acc:MGI:103038]	GO:0035019	somatic stem cell population maintenance
Stat3	signal transducer and activator of transcription 3 [Source:MGI Symbol;Acc:MGI:103038]	GO:0008283	cell population proliferation
Stat3	signal transducer and activator of transcription 3 [Source:MGI Symbol;Acc:MGI:103038]	GO:0000978	RNA polymerase II cis-regulatory region sequence-specific DNA binding
Stat3	signal transducer and activator of transcription 3 [Source:MGI Symbol;Acc:MGI:103038]	GO:0000981	DNA-binding transcription factor activity, RNA polymerase II-specific
Stat3	signal transducer and activator of transcription 3 [Source:MGI Symbol;Acc:MGI:103038]	GO:0006357	regulation of transcription by RNA polymerase II
Stat3	signal transducer and activator of transcription 3 [Source:MGI Symbol;Acc:MGI:103038]	GO:0005886	plasma membrane
Stat3	signal transducer and activator of transcription 3 [Source:MGI Symbol;Acc:MGI:103038]	GO:0006953	acute-phase response
Stat3	signal transducer and activator of transcription 3 [Source:MGI Symbol;Acc:MGI:103038]	GO:0019221	cytokine-mediated signaling pathway
Stat3	signal transducer and activator of transcription 3 [Source:MGI Symbol;Acc:MGI:103038]	GO:0051726	regulation of cell cycle
Stat3	signal transducer and activator of transcription 3 [Source:MGI Symbol;Acc:MGI:103038]	GO:0090575	RNA polymerase II transcription regulator complex
Stat3	signal transducer and activator of transcription 3 [Source:MGI Symbol;Acc:MGI:103038]	GO:0045893	positive regulation of DNA-templated transcription
Stat3	signal transducer and activator of transcription 3 [Source:MGI Symbol;Acc:MGI:103038]	GO:0098978	glutamatergic synapse
Stat3	signal transducer and activator of transcription 3 [Source:MGI Symbol;Acc:MGI:103038]	GO:0140297	DNA-binding transcription factor binding
Stat3	signal transducer and activator of transcription 3 [Source:MGI Symbol;Acc:MGI:103038]	GO:0006606	protein import into nucleus
Stat3	signal transducer and activator of transcription 3 [Source:MGI Symbol;Acc:MGI:103038]	GO:0032991	protein-containing complex
Stat3	signal transducer and activator of transcription 3 [Source:MGI Symbol;Acc:MGI:103038]	GO:0019901	protein kinase binding
Stat3	signal transducer and activator of transcription 3 [Source:MGI Symbol;Acc:MGI:103038]	GO:0042593	glucose homeostasis
Stat3	signal transducer and activator of transcription 3 [Source:MGI Symbol;Acc:MGI:103038]	GO:0071345	cellular response to cytokine stimulus
Stat3	signal transducer and activator of transcription 3 [Source:MGI Symbol;Acc:MGI:103038]	GO:0006952	defense response
Stat3	signal transducer and activator of transcription 3 [Source:MGI Symbol;Acc:MGI:103038]	GO:0042127	regulation of cell population proliferation
Stat3	signal transducer and activator of transcription 3 [Source:MGI Symbol;Acc:MGI:103038]	GO:0042803	protein homodimerization activity
Stat3	signal transducer and activator of transcription 3 [Source:MGI Symbol;Acc:MGI:103038]	GO:0042802	identical protein binding
Stat3	signal transducer and activator of transcription 3 [Source:MGI Symbol;Acc:MGI:103038]	GO:0000976	transcription cis-regulatory region binding
Stat3	signal transducer and activator of transcription 3 [Source:MGI Symbol;Acc:MGI:103038]	GO:0005654	nucleoplasm
Stat3	signal transducer and activator of transcription 3 [Source:MGI Symbol;Acc:MGI:103038]	GO:0005667	transcription regulator complex
Stat3	signal transducer and activator of transcription 3 [Source:MGI Symbol;Acc:MGI:103038]	GO:0032755	positive regulation of interleukin-6 production
Stat3	signal transducer and activator of transcription 3 [Source:MGI Symbol;Acc:MGI:103038]	GO:0016310	phosphorylation
Stat3	signal transducer and activator of transcription 3 [Source:MGI Symbol;Acc:MGI:103038]	GO:0040014	regulation of multicellular organism growth
Stat3	signal transducer and activator of transcription 3 [Source:MGI Symbol;Acc:MGI:103038]	GO:0035259	nuclear glucocorticoid receptor binding
Stat3	signal transducer and activator of transcription 3 [Source:MGI Symbol;Acc:MGI:103038]	GO:0070102	interleukin-6-mediated signaling pathway
Stat3	signal transducer and activator of transcription 3 [Source:MGI Symbol;Acc:MGI:103038]	GO:0098685	Schaffer collateral - CA1 synapse
Stat3	signal transducer and activator of transcription 3 [Source:MGI Symbol;Acc:MGI:103038]	GO:0071407	cellular response to organic cyclic compound
Stat3	signal transducer and activator of transcription 3 [Source:MGI Symbol;Acc:MGI:103038]	GO:0005743	mitochondrial inner membrane
Stat3	signal transducer and activator of transcription 3 [Source:MGI Symbol;Acc:MGI:103038]	GO:0097009	energy homeostasis
Stat3	signal transducer and activator of transcription 3 [Source:MGI Symbol;Acc:MGI:103038]	GO:0034097	response to cytokine
Stat3	signal transducer and activator of transcription 3 [Source:MGI Symbol;Acc:MGI:103038]	GO:0050728	negative regulation of inflammatory response
Stat3	signal transducer and activator of transcription 3 [Source:MGI Symbol;Acc:MGI:103038]	GO:0042755	eating behavior
Stat3	signal transducer and activator of transcription 3 [Source:MGI Symbol;Acc:MGI:103038]	GO:0043434	response to peptide hormone
Stat3	signal transducer and activator of transcription 3 [Source:MGI Symbol;Acc:MGI:103038]	GO:0010628	positive regulation of gene expression
Stat3	signal transducer and activator of transcription 3 [Source:MGI Symbol;Acc:MGI:103038]	GO:0045648	positive regulation of erythrocyte differentiation
Stat3	signal transducer and activator of transcription 3 [Source:MGI Symbol;Acc:MGI:103038]	GO:0031490	chromatin DNA binding
Stat3	signal transducer and activator of transcription 3 [Source:MGI Symbol;Acc:MGI:103038]	GO:0001659	temperature homeostasis
Stat3	signal transducer and activator of transcription 3 [Source:MGI Symbol;Acc:MGI:103038]	GO:0043491	phosphatidylinositol 3-kinase/protein kinase B signal transduction
Stat3	signal transducer and activator of transcription 3 [Source:MGI Symbol;Acc:MGI:103038]	GO:0045766	positive regulation of angiogenesis
Stat3	signal transducer and activator of transcription 3 [Source:MGI Symbol;Acc:MGI:103038]	GO:0106015	negative regulation of inflammatory response to wounding
Stat3	signal transducer and activator of transcription 3 [Source:MGI Symbol;Acc:MGI:103038]	GO:2001223	negative regulation of neuron migration
Stat3	signal transducer and activator of transcription 3 [Source:MGI Symbol;Acc:MGI:103038]	GO:1902895	positive regulation of miRNA transcription
Stat3	signal transducer and activator of transcription 3 [Source:MGI Symbol;Acc:MGI:103038]	GO:0072540	T-helper 17 cell lineage commitment
Stat3	signal transducer and activator of transcription 3 [Source:MGI Symbol;Acc:MGI:103038]	GO:0046983	protein dimerization activity
Stat3	signal transducer and activator of transcription 3 [Source:MGI Symbol;Acc:MGI:103038]	GO:0060019	radial glial cell differentiation
Stat3	signal transducer and activator of transcription 3 [Source:MGI Symbol;Acc:MGI:103038]	GO:0045747	positive regulation of Notch signaling pathway
Stat3	signal transducer and activator of transcription 3 [Source:MGI Symbol;Acc:MGI:103038]	GO:0007259	cell surface receptor signaling pathway via JAK-STAT
Stat3	signal transducer and activator of transcription 3 [Source:MGI Symbol;Acc:MGI:103038]	GO:0045820	negative regulation of glycolytic process
Stat3	signal transducer and activator of transcription 3 [Source:MGI Symbol;Acc:MGI:103038]	GO:0033210	leptin-mediated signaling pathway
Stat3	signal transducer and activator of transcription 3 [Source:MGI Symbol;Acc:MGI:103038]	GO:0050804	modulation of chemical synaptic transmission
Stat3	signal transducer and activator of transcription 3 [Source:MGI Symbol;Acc:MGI:103038]	GO:0042789	mRNA transcription by RNA polymerase II
Stat3	signal transducer and activator of transcription 3 [Source:MGI Symbol;Acc:MGI:103038]	GO:2001171	positive regulation of ATP biosynthetic process
Stat3	signal transducer and activator of transcription 3 [Source:MGI Symbol;Acc:MGI:103038]	GO:0019953	sexual reproduction
Stat3	signal transducer and activator of transcription 3 [Source:MGI Symbol;Acc:MGI:103038]	GO:0055091	phospholipid homeostasis
Stat3	signal transducer and activator of transcription 3 [Source:MGI Symbol;Acc:MGI:103038]	GO:0046902	regulation of mitochondrial membrane permeability
Stat3	signal transducer and activator of transcription 3 [Source:MGI Symbol;Acc:MGI:103038]	GO:0060221	retinal rod cell differentiation
Stat3	signal transducer and activator of transcription 3 [Source:MGI Symbol;Acc:MGI:103038]	GO:0060259	regulation of feeding behavior
Stat3	signal transducer and activator of transcription 3 [Source:MGI Symbol;Acc:MGI:103038]	GO:0010730	negative regulation of hydrogen peroxide biosynthetic process
Stat3	signal transducer and activator of transcription 3 [Source:MGI Symbol;Acc:MGI:103038]	GO:0044320	cellular response to leptin stimulus
Stat3	signal transducer and activator of transcription 3 [Source:MGI Symbol;Acc:MGI:103038]	GO:0031730	CCR5 chemokine receptor binding
Stat3	signal transducer and activator of transcription 3 [Source:MGI Symbol;Acc:MGI:103038]	GO:0140033	acetylation-dependent protein binding
Stat3	signal transducer and activator of transcription 3 [Source:MGI Symbol;Acc:MGI:103038]	GO:0044321	response to leptin
Stat3	signal transducer and activator of transcription 3 [Source:MGI Symbol;Acc:MGI:103038]	GO:0048708	astrocyte differentiation
Stat3	signal transducer and activator of transcription 3 [Source:MGI Symbol;Acc:MGI:103038]	GO:0060397	growth hormone receptor signaling pathway via JAK-STAT
Stat3	signal transducer and activator of transcription 3 [Source:MGI Symbol;Acc:MGI:103038]	GO:0072538	T-helper 17 type immune response
Stat3	signal transducer and activator of transcription 3 [Source:MGI Symbol;Acc:MGI:103038]	GO:0099527	postsynapse to nucleus signaling pathway
Stat3	signal transducer and activator of transcription 3 [Source:MGI Symbol;Acc:MGI:103038]	GO:1900037	regulation of cellular response to hypoxia
Stat3	signal transducer and activator of transcription 3 [Source:MGI Symbol;Acc:MGI:103038]	GO:1902728	positive regulation of growth factor dependent skeletal muscle satellite cell proliferation
Stat3	signal transducer and activator of transcription 3 [Source:MGI Symbol;Acc:MGI:103038]	GO:1905564	positive regulation of vascular endothelial cell proliferation
Stat3	signal transducer and activator of transcription 3 [Source:MGI Symbol;Acc:MGI:103038]	GO:0001228	DNA-binding transcription activator activity, RNA polymerase II-specific
Stat3	signal transducer and activator of transcription 3 [Source:MGI Symbol;Acc:MGI:103038]	GO:0004879	nuclear receptor activity
Stat3	signal transducer and activator of transcription 3 [Source:MGI Symbol;Acc:MGI:103038]	GO:0005102	signaling receptor binding
Stat3	signal transducer and activator of transcription 3 [Source:MGI Symbol;Acc:MGI:103038]	GO:0019903	protein phosphatase binding
Stat3	signal transducer and activator of transcription 3 [Source:MGI Symbol;Acc:MGI:103038]	GO:0035591	signaling adaptor activity
Stat3	signal transducer and activator of transcription 3 [Source:MGI Symbol;Acc:MGI:103038]	GO:0061629	RNA polymerase II-specific DNA-binding transcription factor binding
Stat3	signal transducer and activator of transcription 3 [Source:MGI Symbol;Acc:MGI:103038]	GO:0070878	primary miRNA binding
Stat3	signal transducer and activator of transcription 3 [Source:MGI Symbol;Acc:MGI:103038]	GO:0106222	lncRNA binding
Stat3	signal transducer and activator of transcription 3 [Source:MGI Symbol;Acc:MGI:103038]	GO:0140610	RNA sequestering activity
Stat3	signal transducer and activator of transcription 3 [Source:MGI Symbol;Acc:MGI:103038]	GO:0007179	transforming growth factor beta receptor signaling pathway
Stat3	signal transducer and activator of transcription 3 [Source:MGI Symbol;Acc:MGI:103038]	GO:0010507	negative regulation of autophagy
Stat3	signal transducer and activator of transcription 3 [Source:MGI Symbol;Acc:MGI:103038]	GO:0010575	positive regulation of vascular endothelial growth factor production
Stat3	signal transducer and activator of transcription 3 [Source:MGI Symbol;Acc:MGI:103038]	GO:0010629	negative regulation of gene expression
Stat3	signal transducer and activator of transcription 3 [Source:MGI Symbol;Acc:MGI:103038]	GO:0030154	cell differentiation
Stat3	signal transducer and activator of transcription 3 [Source:MGI Symbol;Acc:MGI:103038]	GO:0030335	positive regulation of cell migration
Stat3	signal transducer and activator of transcription 3 [Source:MGI Symbol;Acc:MGI:103038]	GO:0030522	intracellular receptor signaling pathway
Stat3	signal transducer and activator of transcription 3 [Source:MGI Symbol;Acc:MGI:103038]	GO:0032355	response to estradiol
Stat3	signal transducer and activator of transcription 3 [Source:MGI Symbol;Acc:MGI:103038]	GO:0032731	positive regulation of interleukin-1 beta production
Stat3	signal transducer and activator of transcription 3 [Source:MGI Symbol;Acc:MGI:103038]	GO:0032733	positive regulation of interleukin-10 production
Stat3	signal transducer and activator of transcription 3 [Source:MGI Symbol;Acc:MGI:103038]	GO:0032757	positive regulation of interleukin-8 production
Stat3	signal transducer and activator of transcription 3 [Source:MGI Symbol;Acc:MGI:103038]	GO:0032760	positive regulation of tumor necrosis factor production
Stat3	signal transducer and activator of transcription 3 [Source:MGI Symbol;Acc:MGI:103038]	GO:0032870	cellular response to hormone stimulus
Stat3	signal transducer and activator of transcription 3 [Source:MGI Symbol;Acc:MGI:103038]	GO:0035723	interleukin-15-mediated signaling pathway
Stat3	signal transducer and activator of transcription 3 [Source:MGI Symbol;Acc:MGI:103038]	GO:0038110	interleukin-2-mediated signaling pathway
Stat3	signal transducer and activator of transcription 3 [Source:MGI Symbol;Acc:MGI:103038]	GO:0038113	interleukin-9-mediated signaling pathway
Stat3	signal transducer and activator of transcription 3 [Source:MGI Symbol;Acc:MGI:103038]	GO:0038154	interleukin-11-mediated signaling pathway
Stat3	signal transducer and activator of transcription 3 [Source:MGI Symbol;Acc:MGI:103038]	GO:0038155	interleukin-23-mediated signaling pathway
Stat3	signal transducer and activator of transcription 3 [Source:MGI Symbol;Acc:MGI:103038]	GO:0060396	growth hormone receptor signaling pathway
Stat3	signal transducer and activator of transcription 3 [Source:MGI Symbol;Acc:MGI:103038]	GO:0097696	cell surface receptor signaling pathway via STAT
Stat3	signal transducer and activator of transcription 3 [Source:MGI Symbol;Acc:MGI:103038]	GO:0140105	interleukin-10-mediated signaling pathway
Stat3	signal transducer and activator of transcription 3 [Source:MGI Symbol;Acc:MGI:103038]	GO:1900017	positive regulation of cytokine production involved in inflammatory response
Stat3	signal transducer and activator of transcription 3 [Source:MGI Symbol;Acc:MGI:103038]	GO:2000635	negative regulation of primary miRNA processing
Stat3	signal transducer and activator of transcription 3 [Source:MGI Symbol;Acc:MGI:103038]	GO:0000785	chromatin
Stat3	signal transducer and activator of transcription 3 [Source:MGI Symbol;Acc:MGI:103038]
Htr1b	5-hydroxytryptamine (serotonin) receptor 1B [Source:MGI Symbol;Acc:MGI:96274]	GO:0004930	G protein-coupled receptor activity
Htr1b	5-hydroxytryptamine (serotonin) receptor 1B [Source:MGI Symbol;Acc:MGI:96274]	GO:0007186	G protein-coupled receptor signaling pathway
Htr1b	5-hydroxytryptamine (serotonin) receptor 1B [Source:MGI Symbol;Acc:MGI:96274]	GO:0016020	membrane
Htr1b	5-hydroxytryptamine (serotonin) receptor 1B [Source:MGI Symbol;Acc:MGI:96274]	GO:0005886	plasma membrane
Htr1b	5-hydroxytryptamine (serotonin) receptor 1B [Source:MGI Symbol;Acc:MGI:96274]	GO:0007268	chemical synaptic transmission
Htr1b	5-hydroxytryptamine (serotonin) receptor 1B [Source:MGI Symbol;Acc:MGI:96274]	GO:0046849	bone remodeling
Htr1b	5-hydroxytryptamine (serotonin) receptor 1B [Source:MGI Symbol;Acc:MGI:96274]	GO:0050795	regulation of behavior
Htr1b	5-hydroxytryptamine (serotonin) receptor 1B [Source:MGI Symbol;Acc:MGI:96274]	GO:0042310	vasoconstriction
Htr1b	5-hydroxytryptamine (serotonin) receptor 1B [Source:MGI Symbol;Acc:MGI:96274]	GO:0004993	G protein-coupled serotonin receptor activity
Htr1b	5-hydroxytryptamine (serotonin) receptor 1B [Source:MGI Symbol;Acc:MGI:96274]	GO:0005737	cytoplasm
Htr1b	5-hydroxytryptamine (serotonin) receptor 1B [Source:MGI Symbol;Acc:MGI:96274]	GO:0030425	dendrite
Htr1b	5-hydroxytryptamine (serotonin) receptor 1B [Source:MGI Symbol;Acc:MGI:96274]	GO:0042220	response to cocaine
Htr1b	5-hydroxytryptamine (serotonin) receptor 1B [Source:MGI Symbol;Acc:MGI:96274]	GO:0042734	presynaptic membrane
Htr1b	5-hydroxytryptamine (serotonin) receptor 1B [Source:MGI Symbol;Acc:MGI:96274]	GO:0051967	negative regulation of synaptic transmission, glutamatergic
Htr1b	5-hydroxytryptamine (serotonin) receptor 1B [Source:MGI Symbol;Acc:MGI:96274]	GO:0030594	neurotransmitter receptor activity
Htr1b	5-hydroxytryptamine (serotonin) receptor 1B [Source:MGI Symbol;Acc:MGI:96274]	GO:0045471	response to ethanol
Htr1b	5-hydroxytryptamine (serotonin) receptor 1B [Source:MGI Symbol;Acc:MGI:96274]	GO:0007631	feeding behavior
Htr1b	5-hydroxytryptamine (serotonin) receptor 1B [Source:MGI Symbol;Acc:MGI:96274]	GO:1901363	heterocyclic compound binding
Htr1b	5-hydroxytryptamine (serotonin) receptor 1B [Source:MGI Symbol;Acc:MGI:96274]	GO:0032229	negative regulation of synaptic transmission, GABAergic
Htr1b	5-hydroxytryptamine (serotonin) receptor 1B [Source:MGI Symbol;Acc:MGI:96274]	GO:0099626	voltage-gated calcium channel activity involved in regulation of presynaptic cytosolic calcium levels
Htr1b	5-hydroxytryptamine (serotonin) receptor 1B [Source:MGI Symbol;Acc:MGI:96274]	GO:0099509	regulation of presynaptic cytosolic calcium ion concentration
Htr1b	5-hydroxytryptamine (serotonin) receptor 1B [Source:MGI Symbol;Acc:MGI:96274]	GO:0014059	regulation of dopamine secretion
Htr1b	5-hydroxytryptamine (serotonin) receptor 1B [Source:MGI Symbol;Acc:MGI:96274]	GO:0071466	cellular response to xenobiotic stimulus
Htr1b	5-hydroxytryptamine (serotonin) receptor 1B [Source:MGI Symbol;Acc:MGI:96274]	GO:0042756	drinking behavior
Htr1b	5-hydroxytryptamine (serotonin) receptor 1B [Source:MGI Symbol;Acc:MGI:96274]	GO:0007187	G protein-coupled receptor signaling pathway, coupled to cyclic nucleotide second messenger
Htr1b	5-hydroxytryptamine (serotonin) receptor 1B [Source:MGI Symbol;Acc:MGI:96274]	GO:0044305	calyx of Held
Htr1b	5-hydroxytryptamine (serotonin) receptor 1B [Source:MGI Symbol;Acc:MGI:96274]	GO:0099171	presynaptic modulation of chemical synaptic transmission
Htr1b	5-hydroxytryptamine (serotonin) receptor 1B [Source:MGI Symbol;Acc:MGI:96274]	GO:0001586	Gi/o-coupled serotonin receptor activity
Htr1b	5-hydroxytryptamine (serotonin) receptor 1B [Source:MGI Symbol;Acc:MGI:96274]	GO:0051378	serotonin binding
Htr1b	5-hydroxytryptamine (serotonin) receptor 1B [Source:MGI Symbol;Acc:MGI:96274]	GO:0099589	serotonin receptor activity
Htr1b	5-hydroxytryptamine (serotonin) receptor 1B [Source:MGI Symbol;Acc:MGI:96274]	GO:0007193	adenylate cyclase-inhibiting G protein-coupled receptor signaling pathway
Htr1b	5-hydroxytryptamine (serotonin) receptor 1B [Source:MGI Symbol;Acc:MGI:96274]	GO:0007198	adenylate cyclase-inhibiting serotonin receptor signaling pathway
Htr1b	5-hydroxytryptamine (serotonin) receptor 1B [Source:MGI Symbol;Acc:MGI:96274]	GO:0007208	phospholipase C-activating serotonin receptor signaling pathway
Htr1b	5-hydroxytryptamine (serotonin) receptor 1B [Source:MGI Symbol;Acc:MGI:96274]	GO:0014053	negative regulation of gamma-aminobutyric acid secretion
Htr1b	5-hydroxytryptamine (serotonin) receptor 1B [Source:MGI Symbol;Acc:MGI:96274]	GO:0014063	negative regulation of serotonin secretion
Htr1b	5-hydroxytryptamine (serotonin) receptor 1B [Source:MGI Symbol;Acc:MGI:96274]	GO:0051385	response to mineralocorticoid
Htr1b	5-hydroxytryptamine (serotonin) receptor 1B [Source:MGI Symbol;Acc:MGI:96274]	GO:0071312	cellular response to alkaloid
Htr1b	5-hydroxytryptamine (serotonin) receptor 1B [Source:MGI Symbol;Acc:MGI:96274]	GO:1904707	positive regulation of vascular associated smooth muscle cell proliferation
Htr1b	5-hydroxytryptamine (serotonin) receptor 1B [Source:MGI Symbol;Acc:MGI:96274]	GO:2000300	regulation of synaptic vesicle exocytosis
Htr1b	5-hydroxytryptamine (serotonin) receptor 1B [Source:MGI Symbol;Acc:MGI:96274]	GO:0099154	serotonergic synapse
Htr1b	5-hydroxytryptamine (serotonin) receptor 1B [Source:MGI Symbol;Acc:MGI:96274]	GO:0005783	endoplasmic reticulum
Htr1b	5-hydroxytryptamine (serotonin) receptor 1B [Source:MGI Symbol;Acc:MGI:96274]	GO:0098666	G protein-coupled serotonin receptor complex
Nrtn	neurturin [Source:MGI Symbol;Acc:MGI:108417]	GO:0008083	growth factor activity
Nrtn	neurturin [Source:MGI Symbol;Acc:MGI:108417]	GO:0030971	receptor tyrosine kinase binding
Nrtn	neurturin [Source:MGI Symbol;Acc:MGI:108417]	GO:0030116	glial cell-derived neurotrophic factor receptor binding
Nrtn	neurturin [Source:MGI Symbol;Acc:MGI:108417]	GO:0030424	axon
Nrtn	neurturin [Source:MGI Symbol;Acc:MGI:108417]	GO:0005576	extracellular region
Nrtn	neurturin [Source:MGI Symbol;Acc:MGI:108417]	GO:0005615	extracellular space
Nrtn	neurturin [Source:MGI Symbol;Acc:MGI:108417]	GO:0048731	system development
Nrtn	neurturin [Source:MGI Symbol;Acc:MGI:108417]	GO:0031175	neuron projection development
Nrtn	neurturin [Source:MGI Symbol;Acc:MGI:108417]	GO:0021675	nerve development
Nrtn	neurturin [Source:MGI Symbol;Acc:MGI:108417]	GO:0007169	cell surface receptor protein tyrosine kinase signaling pathway
Nrtn	neurturin [Source:MGI Symbol;Acc:MGI:108417]	GO:1904399	heparan sulfate binding
Nrtn	neurturin [Source:MGI Symbol;Acc:MGI:108417]	GO:0035860	glial cell-derived neurotrophic factor receptor signaling pathway
Nrtn	neurturin [Source:MGI Symbol;Acc:MGI:108417]	GO:0001755	neural crest cell migration
Gfap	glial fibrillary acidic protein [Source:MGI Symbol;Acc:MGI:95697]	GO:0005882	intermediate filament
Gfap	glial fibrillary acidic protein [Source:MGI Symbol;Acc:MGI:95697]	GO:0010467	gene expression
Gfap	glial fibrillary acidic protein [Source:MGI Symbol;Acc:MGI:95697]	GO:0060291	long-term synaptic potentiation
Gfap	glial fibrillary acidic protein [Source:MGI Symbol;Acc:MGI:95697]	GO:0005515	protein binding
Gfap	glial fibrillary acidic protein [Source:MGI Symbol;Acc:MGI:95697]	GO:0005737	cytoplasm
Gfap	glial fibrillary acidic protein [Source:MGI Symbol;Acc:MGI:95697]	GO:0010977	negative regulation of neuron projection development
Gfap	glial fibrillary acidic protein [Source:MGI Symbol;Acc:MGI:95697]	GO:0043229	intracellular organelle
Gfap	glial fibrillary acidic protein [Source:MGI Symbol;Acc:MGI:95697]	GO:0016020	membrane
Gfap	glial fibrillary acidic protein [Source:MGI Symbol;Acc:MGI:95697]	GO:0007010	cytoskeleton organization
Gfap	glial fibrillary acidic protein [Source:MGI Symbol;Acc:MGI:95697]	GO:0099512	supramolecular fiber
Gfap	glial fibrillary acidic protein [Source:MGI Symbol;Acc:MGI:95697]	GO:0045109	intermediate filament organization
Gfap	glial fibrillary acidic protein [Source:MGI Symbol;Acc:MGI:95697]	GO:0043209	myelin sheath
Gfap	glial fibrillary acidic protein [Source:MGI Symbol;Acc:MGI:95697]	GO:0044297	cell body
Gfap	glial fibrillary acidic protein [Source:MGI Symbol;Acc:MGI:95697]	GO:0019900	kinase binding
Gfap	glial fibrillary acidic protein [Source:MGI Symbol;Acc:MGI:95697]	GO:0030198	extracellular matrix organization
Gfap	glial fibrillary acidic protein [Source:MGI Symbol;Acc:MGI:95697]	GO:0042995	cell projection
Gfap	glial fibrillary acidic protein [Source:MGI Symbol;Acc:MGI:95697]	GO:0005200	structural constituent of cytoskeleton
Gfap	glial fibrillary acidic protein [Source:MGI Symbol;Acc:MGI:95697]	GO:0005856	cytoskeleton
Gfap	glial fibrillary acidic protein [Source:MGI Symbol;Acc:MGI:95697]	GO:0031175	neuron projection development
Gfap	glial fibrillary acidic protein [Source:MGI Symbol;Acc:MGI:95697]	GO:0031102	neuron projection regeneration
Gfap	glial fibrillary acidic protein [Source:MGI Symbol;Acc:MGI:95697]	GO:0097386	glial cell projection
Gfap	glial fibrillary acidic protein [Source:MGI Symbol;Acc:MGI:95697]	GO:0006886	intracellular protein transport
Gfap	glial fibrillary acidic protein [Source:MGI Symbol;Acc:MGI:95697]	GO:0060252	positive regulation of glial cell proliferation
Gfap	glial fibrillary acidic protein [Source:MGI Symbol;Acc:MGI:95697]	GO:0005178	integrin binding
Gfap	glial fibrillary acidic protein [Source:MGI Symbol;Acc:MGI:95697]	GO:0070779	D-aspartate import across plasma membrane
Gfap	glial fibrillary acidic protein [Source:MGI Symbol;Acc:MGI:95697]	GO:0060020	Bergmann glial cell differentiation
Gfap	glial fibrillary acidic protein [Source:MGI Symbol;Acc:MGI:95697]	GO:0014010	Schwann cell proliferation
Gfap	glial fibrillary acidic protein [Source:MGI Symbol;Acc:MGI:95697]	GO:0010625	positive regulation of Schwann cell proliferation
Gfap	glial fibrillary acidic protein [Source:MGI Symbol;Acc:MGI:95697]	GO:0014002	astrocyte development
Gfap	glial fibrillary acidic protein [Source:MGI Symbol;Acc:MGI:95697]	GO:0045103	intermediate filament-based process
Gfap	glial fibrillary acidic protein [Source:MGI Symbol;Acc:MGI:95697]	GO:0051580	regulation of neurotransmitter uptake
Gfap	glial fibrillary acidic protein [Source:MGI Symbol;Acc:MGI:95697]	GO:0042802	identical protein binding
Gfap	glial fibrillary acidic protein [Source:MGI Symbol;Acc:MGI:95697]	GO:1904714	regulation of chaperone-mediated autophagy
Gfap	glial fibrillary acidic protein [Source:MGI Symbol;Acc:MGI:95697]	GO:0045111	intermediate filament cytoskeleton
Gfap	glial fibrillary acidic protein [Source:MGI Symbol;Acc:MGI:95697]	GO:0097449	astrocyte projection
Gfap	glial fibrillary acidic protein [Source:MGI Symbol;Acc:MGI:95697]	GO:0097450	astrocyte end-foot
Gfap	glial fibrillary acidic protein [Source:MGI Symbol;Acc:MGI:95697]	GO:0098574	cytoplasmic side of lysosomal membrane
Gfap	glial fibrillary acidic protein [Source:MGI Symbol;Acc:MGI:95697]
Htr2a	5-hydroxytryptamine (serotonin) receptor 2A [Source:MGI Symbol;Acc:MGI:109521]	GO:0004930	G protein-coupled receptor activity
Htr2a	5-hydroxytryptamine (serotonin) receptor 2A [Source:MGI Symbol;Acc:MGI:109521]	GO:0007186	G protein-coupled receptor signaling pathway
Htr2a	5-hydroxytryptamine (serotonin) receptor 2A [Source:MGI Symbol;Acc:MGI:109521]	GO:0016020	membrane
Htr2a	5-hydroxytryptamine (serotonin) receptor 2A [Source:MGI Symbol;Acc:MGI:109521]	GO:0005886	plasma membrane
Htr2a	5-hydroxytryptamine (serotonin) receptor 2A [Source:MGI Symbol;Acc:MGI:109521]	GO:0004993	G protein-coupled serotonin receptor activity
Htr2a	5-hydroxytryptamine (serotonin) receptor 2A [Source:MGI Symbol;Acc:MGI:109521]	GO:0008284	positive regulation of cell population proliferation
Htr2a	5-hydroxytryptamine (serotonin) receptor 2A [Source:MGI Symbol;Acc:MGI:109521]	GO:0044877	protein-containing complex binding
Htr2a	5-hydroxytryptamine (serotonin) receptor 2A [Source:MGI Symbol;Acc:MGI:109521]	GO:0042995	cell projection
Htr2a	5-hydroxytryptamine (serotonin) receptor 2A [Source:MGI Symbol;Acc:MGI:109521]	GO:0031410	cytoplasmic vesicle
Htr2a	5-hydroxytryptamine (serotonin) receptor 2A [Source:MGI Symbol;Acc:MGI:109521]	GO:0045202	synapse
Htr2a	5-hydroxytryptamine (serotonin) receptor 2A [Source:MGI Symbol;Acc:MGI:109521]	GO:0043525	positive regulation of neuron apoptotic process
Htr2a	5-hydroxytryptamine (serotonin) receptor 2A [Source:MGI Symbol;Acc:MGI:109521]	GO:0030425	dendrite
Htr2a	5-hydroxytryptamine (serotonin) receptor 2A [Source:MGI Symbol;Acc:MGI:109521]	GO:0030424	axon
Htr2a	5-hydroxytryptamine (serotonin) receptor 2A [Source:MGI Symbol;Acc:MGI:109521]	GO:0043025	neuronal cell body
Htr2a	5-hydroxytryptamine (serotonin) receptor 2A [Source:MGI Symbol;Acc:MGI:109521]	GO:0043198	dendritic shaft
Htr2a	5-hydroxytryptamine (serotonin) receptor 2A [Source:MGI Symbol;Acc:MGI:109521]	GO:0009410	response to xenobiotic stimulus
Htr2a	5-hydroxytryptamine (serotonin) receptor 2A [Source:MGI Symbol;Acc:MGI:109521]	GO:0007204	positive regulation of cytosolic calcium ion concentration
Htr2a	5-hydroxytryptamine (serotonin) receptor 2A [Source:MGI Symbol;Acc:MGI:109521]	GO:0098978	glutamatergic synapse
Htr2a	5-hydroxytryptamine (serotonin) receptor 2A [Source:MGI Symbol;Acc:MGI:109521]	GO:0005901	caveola
Htr2a	5-hydroxytryptamine (serotonin) receptor 2A [Source:MGI Symbol;Acc:MGI:109521]	GO:0098793	presynapse
Htr2a	5-hydroxytryptamine (serotonin) receptor 2A [Source:MGI Symbol;Acc:MGI:109521]	GO:0007200	phospholipase C-activating G protein-coupled receptor signaling pathway
Htr2a	5-hydroxytryptamine (serotonin) receptor 2A [Source:MGI Symbol;Acc:MGI:109521]	GO:0007613	memory
Htr2a	5-hydroxytryptamine (serotonin) receptor 2A [Source:MGI Symbol;Acc:MGI:109521]	GO:0031982	vesicle
Htr2a	5-hydroxytryptamine (serotonin) receptor 2A [Source:MGI Symbol;Acc:MGI:109521]	GO:0006096	glycolytic process
Htr2a	5-hydroxytryptamine (serotonin) receptor 2A [Source:MGI Symbol;Acc:MGI:109521]	GO:0050731	positive regulation of peptidyl-tyrosine phosphorylation
Htr2a	5-hydroxytryptamine (serotonin) receptor 2A [Source:MGI Symbol;Acc:MGI:109521]	GO:0070374	positive regulation of ERK1 and ERK2 cascade
Htr2a	5-hydroxytryptamine (serotonin) receptor 2A [Source:MGI Symbol;Acc:MGI:109521]	GO:0045211	postsynaptic membrane
Htr2a	5-hydroxytryptamine (serotonin) receptor 2A [Source:MGI Symbol;Acc:MGI:109521]	GO:0050965	detection of temperature stimulus involved in sensory perception of pain
Htr2a	5-hydroxytryptamine (serotonin) receptor 2A [Source:MGI Symbol;Acc:MGI:109521]	GO:0042734	presynaptic membrane
Htr2a	5-hydroxytryptamine (serotonin) receptor 2A [Source:MGI Symbol;Acc:MGI:109521]	GO:0051209	release of sequestered calcium ion into cytosol
Htr2a	5-hydroxytryptamine (serotonin) receptor 2A [Source:MGI Symbol;Acc:MGI:109521]	GO:0043267	negative regulation of potassium ion transport
Htr2a	5-hydroxytryptamine (serotonin) receptor 2A [Source:MGI Symbol;Acc:MGI:109521]	GO:0051967	negative regulation of synaptic transmission, glutamatergic
Htr2a	5-hydroxytryptamine (serotonin) receptor 2A [Source:MGI Symbol;Acc:MGI:109521]	GO:0007268	chemical synaptic transmission
Htr2a	5-hydroxytryptamine (serotonin) receptor 2A [Source:MGI Symbol;Acc:MGI:109521]	GO:0030594	neurotransmitter receptor activity
Htr2a	5-hydroxytryptamine (serotonin) receptor 2A [Source:MGI Symbol;Acc:MGI:109521]	GO:0070852	cell body fiber
Htr2a	5-hydroxytryptamine (serotonin) receptor 2A [Source:MGI Symbol;Acc:MGI:109521]	GO:0014824	artery smooth muscle contraction
Htr2a	5-hydroxytryptamine (serotonin) receptor 2A [Source:MGI Symbol;Acc:MGI:109521]	GO:0030296	protein tyrosine kinase activator activity
Htr2a	5-hydroxytryptamine (serotonin) receptor 2A [Source:MGI Symbol;Acc:MGI:109521]	GO:0001659	temperature homeostasis
Htr2a	5-hydroxytryptamine (serotonin) receptor 2A [Source:MGI Symbol;Acc:MGI:109521]	GO:0045907	positive regulation of vasoconstriction
Htr2a	5-hydroxytryptamine (serotonin) receptor 2A [Source:MGI Symbol;Acc:MGI:109521]	GO:2000573	positive regulation of DNA biosynthetic process
Htr2a	5-hydroxytryptamine (serotonin) receptor 2A [Source:MGI Symbol;Acc:MGI:109521]	GO:0014059	regulation of dopamine secretion
Htr2a	5-hydroxytryptamine (serotonin) receptor 2A [Source:MGI Symbol;Acc:MGI:109521]	GO:0048148	behavioral response to cocaine
Htr2a	5-hydroxytryptamine (serotonin) receptor 2A [Source:MGI Symbol;Acc:MGI:109521]	GO:0050729	positive regulation of inflammatory response
Htr2a	5-hydroxytryptamine (serotonin) receptor 2A [Source:MGI Symbol;Acc:MGI:109521]	GO:0045600	positive regulation of fat cell differentiation
Htr2a	5-hydroxytryptamine (serotonin) receptor 2A [Source:MGI Symbol;Acc:MGI:109521]	GO:1900119	positive regulation of execution phase of apoptosis
Htr2a	5-hydroxytryptamine (serotonin) receptor 2A [Source:MGI Symbol;Acc:MGI:109521]	GO:0045821	positive regulation of glycolytic process
Htr2a	5-hydroxytryptamine (serotonin) receptor 2A [Source:MGI Symbol;Acc:MGI:109521]	GO:0050966	detection of mechanical stimulus involved in sensory perception of pain
Htr2a	5-hydroxytryptamine (serotonin) receptor 2A [Source:MGI Symbol;Acc:MGI:109521]	GO:0005883	neurofilament
Htr2a	5-hydroxytryptamine (serotonin) receptor 2A [Source:MGI Symbol;Acc:MGI:109521]	GO:0007187	G protein-coupled receptor signaling pathway, coupled to cyclic nucleotide second messenger
Htr2a	5-hydroxytryptamine (serotonin) receptor 2A [Source:MGI Symbol;Acc:MGI:109521]	GO:0099171	presynaptic modulation of chemical synaptic transmission
Htr2a	5-hydroxytryptamine (serotonin) receptor 2A [Source:MGI Symbol;Acc:MGI:109521]	GO:0051378	serotonin binding
Htr2a	5-hydroxytryptamine (serotonin) receptor 2A [Source:MGI Symbol;Acc:MGI:109521]	GO:0014832	urinary bladder smooth muscle contraction
Htr2a	5-hydroxytryptamine (serotonin) receptor 2A [Source:MGI Symbol;Acc:MGI:109521]	GO:0050951	sensory perception of temperature stimulus
Htr2a	5-hydroxytryptamine (serotonin) receptor 2A [Source:MGI Symbol;Acc:MGI:109521]	GO:0007208	phospholipase C-activating serotonin receptor signaling pathway
Htr2a	5-hydroxytryptamine (serotonin) receptor 2A [Source:MGI Symbol;Acc:MGI:109521]	GO:0007210	serotonin receptor signaling pathway
Htr2a	5-hydroxytryptamine (serotonin) receptor 2A [Source:MGI Symbol;Acc:MGI:109521]	GO:0046960	sensitization
Htr2a	5-hydroxytryptamine (serotonin) receptor 2A [Source:MGI Symbol;Acc:MGI:109521]	GO:0044380	protein localization to cytoskeleton
Htr2a	5-hydroxytryptamine (serotonin) receptor 2A [Source:MGI Symbol;Acc:MGI:109521]	GO:0001587	Gq/11-coupled serotonin receptor activity
Htr2a	5-hydroxytryptamine (serotonin) receptor 2A [Source:MGI Symbol;Acc:MGI:109521]	GO:0042802	identical protein binding
Htr2a	5-hydroxytryptamine (serotonin) receptor 2A [Source:MGI Symbol;Acc:MGI:109521]	GO:0071886	1-(4-iodo-2,5-dimethoxyphenyl)propan-2-amine binding
Htr2a	5-hydroxytryptamine (serotonin) receptor 2A [Source:MGI Symbol;Acc:MGI:109521]	GO:0099589	serotonin receptor activity
Htr2a	5-hydroxytryptamine (serotonin) receptor 2A [Source:MGI Symbol;Acc:MGI:109521]	GO:0002720	positive regulation of cytokine production involved in immune response
Htr2a	5-hydroxytryptamine (serotonin) receptor 2A [Source:MGI Symbol;Acc:MGI:109521]	GO:0006874	intracellular calcium ion homeostasis
Htr2a	5-hydroxytryptamine (serotonin) receptor 2A [Source:MGI Symbol;Acc:MGI:109521]	GO:0010513	positive regulation of phosphatidylinositol biosynthetic process
Htr2a	5-hydroxytryptamine (serotonin) receptor 2A [Source:MGI Symbol;Acc:MGI:109521]	GO:0031652	positive regulation of heat generation
Htr2a	5-hydroxytryptamine (serotonin) receptor 2A [Source:MGI Symbol;Acc:MGI:109521]	GO:0042220	response to cocaine
Htr2a	5-hydroxytryptamine (serotonin) receptor 2A [Source:MGI Symbol;Acc:MGI:109521]	GO:0098664	G protein-coupled serotonin receptor signaling pathway
Htr2a	5-hydroxytryptamine (serotonin) receptor 2A [Source:MGI Symbol;Acc:MGI:109521]	GO:1901731	positive regulation of platelet aggregation
Htr2a	5-hydroxytryptamine (serotonin) receptor 2A [Source:MGI Symbol;Acc:MGI:109521]	GO:0098666	G protein-coupled serotonin receptor complex
Dnmt3b	DNA methyltransferase 3B [Source:MGI Symbol;Acc:MGI:1261819]	GO:0008168	methyltransferase activity
Dnmt3b	DNA methyltransferase 3B [Source:MGI Symbol;Acc:MGI:1261819]	GO:0010468	regulation of gene expression
Dnmt3b	DNA methyltransferase 3B [Source:MGI Symbol;Acc:MGI:1261819]	GO:0009008	DNA-methyltransferase activity
Dnmt3b	DNA methyltransferase 3B [Source:MGI Symbol;Acc:MGI:1261819]	GO:0005634	nucleus
Dnmt3b	DNA methyltransferase 3B [Source:MGI Symbol;Acc:MGI:1261819]	GO:0071230	cellular response to amino acid stimulus
Dnmt3b	DNA methyltransferase 3B [Source:MGI Symbol;Acc:MGI:1261819]	GO:0005515	protein binding
Dnmt3b	DNA methyltransferase 3B [Source:MGI Symbol;Acc:MGI:1261819]	GO:0000122	negative regulation of transcription by RNA polymerase II
Dnmt3b	DNA methyltransferase 3B [Source:MGI Symbol;Acc:MGI:1261819]	GO:0045666	positive regulation of neuron differentiation
Dnmt3b	DNA methyltransferase 3B [Source:MGI Symbol;Acc:MGI:1261819]	GO:0106222	lncRNA binding
Dnmt3b	DNA methyltransferase 3B [Source:MGI Symbol;Acc:MGI:1261819]	GO:0003682	chromatin binding
Dnmt3b	DNA methyltransferase 3B [Source:MGI Symbol;Acc:MGI:1261819]	GO:0046872	metal ion binding
Dnmt3b	DNA methyltransferase 3B [Source:MGI Symbol;Acc:MGI:1261819]	GO:0003677	DNA binding
Dnmt3b	DNA methyltransferase 3B [Source:MGI Symbol;Acc:MGI:1261819]	GO:0032259	methylation
Dnmt3b	DNA methyltransferase 3B [Source:MGI Symbol;Acc:MGI:1261819]	GO:0000775	chromosome, centromeric region
Dnmt3b	DNA methyltransferase 3B [Source:MGI Symbol;Acc:MGI:1261819]	GO:0140640	catalytic activity, acting on a nucleic acid
Dnmt3b	DNA methyltransferase 3B [Source:MGI Symbol;Acc:MGI:1261819]	GO:0003006	developmental process involved in reproduction
Dnmt3b	DNA methyltransferase 3B [Source:MGI Symbol;Acc:MGI:1261819]	GO:0007276	gamete generation
Dnmt3b	DNA methyltransferase 3B [Source:MGI Symbol;Acc:MGI:1261819]	GO:0031507	heterochromatin formation
Dnmt3b	DNA methyltransferase 3B [Source:MGI Symbol;Acc:MGI:1261819]	GO:0045892	negative regulation of DNA-templated transcription
Dnmt3b	DNA methyltransferase 3B [Source:MGI Symbol;Acc:MGI:1261819]	GO:0040029	epigenetic regulation of gene expression
Dnmt3b	DNA methyltransferase 3B [Source:MGI Symbol;Acc:MGI:1261819]	GO:0005654	nucleoplasm
Dnmt3b	DNA methyltransferase 3B [Source:MGI Symbol;Acc:MGI:1261819]	GO:0042826	histone deacetylase binding
Dnmt3b	DNA methyltransferase 3B [Source:MGI Symbol;Acc:MGI:1261819]	GO:0031503	protein-containing complex localization
Dnmt3b	DNA methyltransferase 3B [Source:MGI Symbol;Acc:MGI:1261819]	GO:0003886	DNA (cytosine-5-)-methyltransferase activity
Dnmt3b	DNA methyltransferase 3B [Source:MGI Symbol;Acc:MGI:1261819]	GO:0006346	DNA methylation-dependent heterochromatin formation
Dnmt3b	DNA methyltransferase 3B [Source:MGI Symbol;Acc:MGI:1261819]	GO:0000792	heterochromatin
Dnmt3b	DNA methyltransferase 3B [Source:MGI Symbol;Acc:MGI:1261819]	GO:0045814	negative regulation of gene expression, epigenetic
Dnmt3b	DNA methyltransferase 3B [Source:MGI Symbol;Acc:MGI:1261819]	GO:0043045	epigenetic programming of gene expression
Dnmt3b	DNA methyltransferase 3B [Source:MGI Symbol;Acc:MGI:1261819]	GO:0141068	autosome genomic imprinting
Dnmt3b	DNA methyltransferase 3B [Source:MGI Symbol;Acc:MGI:1261819]	GO:0051719	DNA (cytosine-5-)-methyltransferase activity, acting on CpN substrates
Dnmt3b	DNA methyltransferase 3B [Source:MGI Symbol;Acc:MGI:1261819]	GO:0051718	DNA (cytosine-5-)-methyltransferase activity, acting on CpG substrates
Dnmt3b	DNA methyltransferase 3B [Source:MGI Symbol;Acc:MGI:1261819]	GO:0001666	response to hypoxia
Dnmt3b	DNA methyltransferase 3B [Source:MGI Symbol;Acc:MGI:1261819]	GO:0009410	response to xenobiotic stimulus
Dnmt3b	DNA methyltransferase 3B [Source:MGI Symbol;Acc:MGI:1261819]	GO:0009636	response to toxic substance
Dnmt3b	DNA methyltransferase 3B [Source:MGI Symbol;Acc:MGI:1261819]	GO:0010212	response to ionizing radiation
Dnmt3b	DNA methyltransferase 3B [Source:MGI Symbol;Acc:MGI:1261819]	GO:0014823	response to activity
Dnmt3b	DNA methyltransferase 3B [Source:MGI Symbol;Acc:MGI:1261819]	GO:0031000	response to caffeine
Dnmt3b	DNA methyltransferase 3B [Source:MGI Symbol;Acc:MGI:1261819]	GO:0032355	response to estradiol
Dnmt3b	DNA methyltransferase 3B [Source:MGI Symbol;Acc:MGI:1261819]	GO:0033189	response to vitamin A
Dnmt3b	DNA methyltransferase 3B [Source:MGI Symbol;Acc:MGI:1261819]	GO:0042220	response to cocaine
Dnmt3b	DNA methyltransferase 3B [Source:MGI Symbol;Acc:MGI:1261819]	GO:0071455	cellular response to hyperoxia
Dnmt3b	DNA methyltransferase 3B [Source:MGI Symbol;Acc:MGI:1261819]	GO:0071549	cellular response to dexamethasone stimulus
Dnmt3b	DNA methyltransferase 3B [Source:MGI Symbol;Acc:MGI:1261819]	GO:0097305	response to alcohol
Dnmt3b	DNA methyltransferase 3B [Source:MGI Symbol;Acc:MGI:1261819]
Fkbp5	FK506 binding protein 5 [Source:MGI Symbol;Acc:MGI:104670]	GO:0005515	protein binding
Fkbp5	FK506 binding protein 5 [Source:MGI Symbol;Acc:MGI:104670]	GO:0003755	peptidyl-prolyl cis-trans isomerase activity
Fkbp5	FK506 binding protein 5 [Source:MGI Symbol;Acc:MGI:104670]	GO:0009617	response to bacterium
Fkbp5	FK506 binding protein 5 [Source:MGI Symbol;Acc:MGI:104670]	GO:0005634	nucleus
Fkbp5	FK506 binding protein 5 [Source:MGI Symbol;Acc:MGI:104670]	GO:0005737	cytoplasm
Fkbp5	FK506 binding protein 5 [Source:MGI Symbol;Acc:MGI:104670]	GO:0016853	isomerase activity
Fkbp5	FK506 binding protein 5 [Source:MGI Symbol;Acc:MGI:104670]	GO:0005829	cytosol
Fkbp5	FK506 binding protein 5 [Source:MGI Symbol;Acc:MGI:104670]	GO:0061077	chaperone-mediated protein folding
Fkbp5	FK506 binding protein 5 [Source:MGI Symbol;Acc:MGI:104670]	GO:0030674	protein-macromolecule adaptor activity
Fkbp5	FK506 binding protein 5 [Source:MGI Symbol;Acc:MGI:104670]	GO:0031072	heat shock protein binding
Fkbp5	FK506 binding protein 5 [Source:MGI Symbol;Acc:MGI:104670]	GO:0042220	response to cocaine
Fkbp5	FK506 binding protein 5 [Source:MGI Symbol;Acc:MGI:104670]	GO:0097305	response to alcohol
Fkbp5	FK506 binding protein 5 [Source:MGI Symbol;Acc:MGI:104670]	GO:0005654	nucleoplasm
Fkbp5	FK506 binding protein 5 [Source:MGI Symbol;Acc:MGI:104670]
Fkbp5	FK506 binding protein 5 [Source:MGI Symbol;Acc:MGI:104670]	GO:0016529	sarcoplasmic reticulum
Mc4r	melanocortin 4 receptor [Source:MGI Symbol;Acc:MGI:99457]	GO:0004930	G protein-coupled receptor activity
Mc4r	melanocortin 4 receptor [Source:MGI Symbol;Acc:MGI:99457]	GO:0007186	G protein-coupled receptor signaling pathway
Mc4r	melanocortin 4 receptor [Source:MGI Symbol;Acc:MGI:99457]	GO:0016020	membrane
Mc4r	melanocortin 4 receptor [Source:MGI Symbol;Acc:MGI:99457]	GO:0004977	melanocortin receptor activity
Mc4r	melanocortin 4 receptor [Source:MGI Symbol;Acc:MGI:99457]	GO:0005515	protein binding
Mc4r	melanocortin 4 receptor [Source:MGI Symbol;Acc:MGI:99457]	GO:0030073	insulin secretion
Mc4r	melanocortin 4 receptor [Source:MGI Symbol;Acc:MGI:99457]	GO:0032868	response to insulin
Mc4r	melanocortin 4 receptor [Source:MGI Symbol;Acc:MGI:99457]	GO:0005886	plasma membrane
Mc4r	melanocortin 4 receptor [Source:MGI Symbol;Acc:MGI:99457]	GO:0005737	cytoplasm
Mc4r	melanocortin 4 receptor [Source:MGI Symbol;Acc:MGI:99457]	GO:0007189	adenylate cyclase-activating G protein-coupled receptor signaling pathway
Mc4r	melanocortin 4 receptor [Source:MGI Symbol;Acc:MGI:99457]	GO:0042562	hormone binding
Mc4r	melanocortin 4 receptor [Source:MGI Symbol;Acc:MGI:99457]	GO:0006112	energy reserve metabolic process
Mc4r	melanocortin 4 receptor [Source:MGI Symbol;Acc:MGI:99457]	GO:0007631	feeding behavior
Mc4r	melanocortin 4 receptor [Source:MGI Symbol;Acc:MGI:99457]	GO:0019222	regulation of metabolic process
Mc4r	melanocortin 4 receptor [Source:MGI Symbol;Acc:MGI:99457]	GO:2000252	negative regulation of feeding behavior
Mc4r	melanocortin 4 receptor [Source:MGI Symbol;Acc:MGI:99457]	GO:0017046	peptide hormone binding
Mc4r	melanocortin 4 receptor [Source:MGI Symbol;Acc:MGI:99457]	GO:1990680	response to melanocyte-stimulating hormone
Mc4r	melanocortin 4 receptor [Source:MGI Symbol;Acc:MGI:99457]	GO:0002024	diet induced thermogenesis
Mc4r	melanocortin 4 receptor [Source:MGI Symbol;Acc:MGI:99457]	GO:0004980	melanocyte-stimulating hormone receptor activity
Mc4r	melanocortin 4 receptor [Source:MGI Symbol;Acc:MGI:99457]	GO:0060259	regulation of feeding behavior
Mc4r	melanocortin 4 receptor [Source:MGI Symbol;Acc:MGI:99457]	GO:0031625	ubiquitin protein ligase binding
Mc4r	melanocortin 4 receptor [Source:MGI Symbol;Acc:MGI:99457]	GO:0042923	neuropeptide binding
Mc4r	melanocortin 4 receptor [Source:MGI Symbol;Acc:MGI:99457]	GO:0045780	positive regulation of bone resorption
Mc4r	melanocortin 4 receptor [Source:MGI Symbol;Acc:MGI:99457]	GO:1903925	response to bisphenol A
Mc4r	melanocortin 4 receptor [Source:MGI Symbol;Acc:MGI:99457]	GO:1903998	regulation of eating behavior
Mc4r	melanocortin 4 receptor [Source:MGI Symbol;Acc:MGI:99457]	GO:2000821	regulation of grooming behavior
Pkp2	plakophilin 2 [Source:MGI Symbol;Acc:MGI:1914701]
Pkp2	plakophilin 2 [Source:MGI Symbol;Acc:MGI:1914701]	GO:0005515	protein binding
Pkp2	plakophilin 2 [Source:MGI Symbol;Acc:MGI:1914701]	GO:0098609	cell-cell adhesion
Pkp2	plakophilin 2 [Source:MGI Symbol;Acc:MGI:1914701]	GO:0008285	negative regulation of cell population proliferation
Pkp2	plakophilin 2 [Source:MGI Symbol;Acc:MGI:1914701]	GO:0007507	heart development
Pkp2	plakophilin 2 [Source:MGI Symbol;Acc:MGI:1914701]	GO:0005634	nucleus
Pkp2	plakophilin 2 [Source:MGI Symbol;Acc:MGI:1914701]	GO:0005737	cytoplasm
Pkp2	plakophilin 2 [Source:MGI Symbol;Acc:MGI:1914701]	GO:0005886	plasma membrane
Pkp2	plakophilin 2 [Source:MGI Symbol;Acc:MGI:1914701]	GO:0003677	DNA binding
Pkp2	plakophilin 2 [Source:MGI Symbol;Acc:MGI:1914701]	GO:0007155	cell adhesion
Pkp2	plakophilin 2 [Source:MGI Symbol;Acc:MGI:1914701]	GO:0070161	anchoring junction
Pkp2	plakophilin 2 [Source:MGI Symbol;Acc:MGI:1914701]	GO:0030054	cell junction
Pkp2	plakophilin 2 [Source:MGI Symbol;Acc:MGI:1914701]	GO:0005911	cell-cell junction
Pkp2	plakophilin 2 [Source:MGI Symbol;Acc:MGI:1914701]	GO:0045296	cadherin binding
Pkp2	plakophilin 2 [Source:MGI Symbol;Acc:MGI:1914701]	GO:0005912	adherens junction
Pkp2	plakophilin 2 [Source:MGI Symbol;Acc:MGI:1914701]	GO:0030057	desmosome
Pkp2	plakophilin 2 [Source:MGI Symbol;Acc:MGI:1914701]	GO:0045110	intermediate filament bundle assembly
Pkp2	plakophilin 2 [Source:MGI Symbol;Acc:MGI:1914701]	GO:0072659	protein localization to plasma membrane
Pkp2	plakophilin 2 [Source:MGI Symbol;Acc:MGI:1914701]	GO:0014704	intercalated disc
Pkp2	plakophilin 2 [Source:MGI Symbol;Acc:MGI:1914701]	GO:0030336	negative regulation of cell migration
Pkp2	plakophilin 2 [Source:MGI Symbol;Acc:MGI:1914701]	GO:0005882	intermediate filament
Pkp2	plakophilin 2 [Source:MGI Symbol;Acc:MGI:1914701]	GO:0055088	lipid homeostasis
Pkp2	plakophilin 2 [Source:MGI Symbol;Acc:MGI:1914701]	GO:2000810	regulation of bicellular tight junction assembly
Pkp2	plakophilin 2 [Source:MGI Symbol;Acc:MGI:1914701]	GO:0016264	gap junction assembly
Pkp2	plakophilin 2 [Source:MGI Symbol;Acc:MGI:1914701]	GO:0086001	cardiac muscle cell action potential
Pkp2	plakophilin 2 [Source:MGI Symbol;Acc:MGI:1914701]	GO:0005080	protein kinase C binding
Pkp2	plakophilin 2 [Source:MGI Symbol;Acc:MGI:1914701]	GO:0019215	intermediate filament binding
Pkp2	plakophilin 2 [Source:MGI Symbol;Acc:MGI:1914701]	GO:0045294	alpha-catenin binding
Pkp2	plakophilin 2 [Source:MGI Symbol;Acc:MGI:1914701]	GO:0060090	molecular adaptor activity
Pkp2	plakophilin 2 [Source:MGI Symbol;Acc:MGI:1914701]	GO:0002159	desmosome assembly
Pkp2	plakophilin 2 [Source:MGI Symbol;Acc:MGI:1914701]	GO:0002934	desmosome organization
Pkp2	plakophilin 2 [Source:MGI Symbol;Acc:MGI:1914701]	GO:0010810	regulation of cell-substrate adhesion
Pkp2	plakophilin 2 [Source:MGI Symbol;Acc:MGI:1914701]	GO:0034334	adherens junction maintenance
Pkp2	plakophilin 2 [Source:MGI Symbol;Acc:MGI:1914701]	GO:0048496	maintenance of animal organ identity
Pkp2	plakophilin 2 [Source:MGI Symbol;Acc:MGI:1914701]	GO:0055010	ventricular cardiac muscle tissue morphogenesis
Pkp2	plakophilin 2 [Source:MGI Symbol;Acc:MGI:1914701]	GO:0086002	cardiac muscle cell action potential involved in contraction
Pkp2	plakophilin 2 [Source:MGI Symbol;Acc:MGI:1914701]	GO:0086005	ventricular cardiac muscle cell action potential
Pkp2	plakophilin 2 [Source:MGI Symbol;Acc:MGI:1914701]	GO:0086019	cell-cell signaling involved in cardiac conduction
Pkp2	plakophilin 2 [Source:MGI Symbol;Acc:MGI:1914701]	GO:0086073	bundle of His cell-Purkinje myocyte adhesion involved in cell communication
Pkp2	plakophilin 2 [Source:MGI Symbol;Acc:MGI:1914701]	GO:0086091	regulation of heart rate by cardiac conduction
Pkp2	plakophilin 2 [Source:MGI Symbol;Acc:MGI:1914701]	GO:0098911	regulation of ventricular cardiac muscle cell action potential
Pkp2	plakophilin 2 [Source:MGI Symbol;Acc:MGI:1914701]	GO:0099017	maintenance of protein localization at cell tip
Pkp2	plakophilin 2 [Source:MGI Symbol;Acc:MGI:1914701]	GO:1900024	regulation of substrate adhesion-dependent cell spreading
Pkp2	plakophilin 2 [Source:MGI Symbol;Acc:MGI:1914701]	GO:0005654	nucleoplasm
Pkp2	plakophilin 2 [Source:MGI Symbol;Acc:MGI:1914701]	GO:0051286	cell tip
Scn10a	sodium channel, voltage-gated, type X, alpha [Source:MGI Symbol;Acc:MGI:108029]	GO:0016020	membrane
Scn10a	sodium channel, voltage-gated, type X, alpha [Source:MGI Symbol;Acc:MGI:108029]	GO:0055085	transmembrane transport
Scn10a	sodium channel, voltage-gated, type X, alpha [Source:MGI Symbol;Acc:MGI:108029]	GO:0006811	monoatomic ion transport
Scn10a	sodium channel, voltage-gated, type X, alpha [Source:MGI Symbol;Acc:MGI:108029]	GO:0006814	sodium ion transport
Scn10a	sodium channel, voltage-gated, type X, alpha [Source:MGI Symbol;Acc:MGI:108029]	GO:0005886	plasma membrane
Scn10a	sodium channel, voltage-gated, type X, alpha [Source:MGI Symbol;Acc:MGI:108029]	GO:0005216	monoatomic ion channel activity
Scn10a	sodium channel, voltage-gated, type X, alpha [Source:MGI Symbol;Acc:MGI:108029]	GO:0005248	voltage-gated sodium channel activity
Scn10a	sodium channel, voltage-gated, type X, alpha [Source:MGI Symbol;Acc:MGI:108029]	GO:0001518	voltage-gated sodium channel complex
Scn10a	sodium channel, voltage-gated, type X, alpha [Source:MGI Symbol;Acc:MGI:108029]	GO:0005261	monoatomic cation channel activity
Scn10a	sodium channel, voltage-gated, type X, alpha [Source:MGI Symbol;Acc:MGI:108029]	GO:0034220	monoatomic ion transmembrane transport
Scn10a	sodium channel, voltage-gated, type X, alpha [Source:MGI Symbol;Acc:MGI:108029]	GO:0034702	monoatomic ion channel complex
Scn10a	sodium channel, voltage-gated, type X, alpha [Source:MGI Symbol;Acc:MGI:108029]	GO:0005272	sodium channel activity
Scn10a	sodium channel, voltage-gated, type X, alpha [Source:MGI Symbol;Acc:MGI:108029]	GO:0099505	regulation of presynaptic membrane potential
Scn10a	sodium channel, voltage-gated, type X, alpha [Source:MGI Symbol;Acc:MGI:108029]	GO:0044325	transmembrane transporter binding
Scn10a	sodium channel, voltage-gated, type X, alpha [Source:MGI Symbol;Acc:MGI:108029]	GO:0099508	voltage-gated monoatomic ion channel activity involved in regulation of presynaptic membrane potential
Scn10a	sodium channel, voltage-gated, type X, alpha [Source:MGI Symbol;Acc:MGI:108029]	GO:0002027	regulation of heart rate
Scn10a	sodium channel, voltage-gated, type X, alpha [Source:MGI Symbol;Acc:MGI:108029]	GO:0034765	regulation of monoatomic ion transmembrane transport
Scn10a	sodium channel, voltage-gated, type X, alpha [Source:MGI Symbol;Acc:MGI:108029]	GO:0035725	sodium ion transmembrane transport
Scn10a	sodium channel, voltage-gated, type X, alpha [Source:MGI Symbol;Acc:MGI:108029]	GO:0042475	odontogenesis of dentin-containing tooth
Scn10a	sodium channel, voltage-gated, type X, alpha [Source:MGI Symbol;Acc:MGI:108029]	GO:0055117	regulation of cardiac muscle contraction
Scn10a	sodium channel, voltage-gated, type X, alpha [Source:MGI Symbol;Acc:MGI:108029]	GO:0060371	regulation of atrial cardiac muscle cell membrane depolarization
Scn10a	sodium channel, voltage-gated, type X, alpha [Source:MGI Symbol;Acc:MGI:108029]	GO:0086010	membrane depolarization during action potential
Scn10a	sodium channel, voltage-gated, type X, alpha [Source:MGI Symbol;Acc:MGI:108029]	GO:0086016	AV node cell action potential
Scn10a	sodium channel, voltage-gated, type X, alpha [Source:MGI Symbol;Acc:MGI:108029]	GO:0086043	bundle of His cell action potential
Scn10a	sodium channel, voltage-gated, type X, alpha [Source:MGI Symbol;Acc:MGI:108029]	GO:0030424	axon
Scn10a	sodium channel, voltage-gated, type X, alpha [Source:MGI Symbol;Acc:MGI:108029]	GO:0042734	presynaptic membrane
Scn10a	sodium channel, voltage-gated, type X, alpha [Source:MGI Symbol;Acc:MGI:108029]	GO:0098978	glutamatergic synapse
Scn10a	sodium channel, voltage-gated, type X, alpha [Source:MGI Symbol;Acc:MGI:108029]	GO:0071439	clathrin complex
Scn10a	sodium channel, voltage-gated, type X, alpha [Source:MGI Symbol;Acc:MGI:108029]	GO:0061337	cardiac conduction
Scn10a	sodium channel, voltage-gated, type X, alpha [Source:MGI Symbol;Acc:MGI:108029]	GO:0051649	establishment of localization in cell
Scn10a	sodium channel, voltage-gated, type X, alpha [Source:MGI Symbol;Acc:MGI:108029]	GO:0050965	detection of temperature stimulus involved in sensory perception of pain
Scn10a	sodium channel, voltage-gated, type X, alpha [Source:MGI Symbol;Acc:MGI:108029]	GO:0007623	circadian rhythm
Scn10a	sodium channel, voltage-gated, type X, alpha [Source:MGI Symbol;Acc:MGI:108029]	GO:0019228	neuronal action potential
Scn10a	sodium channel, voltage-gated, type X, alpha [Source:MGI Symbol;Acc:MGI:108029]	GO:0048266	behavioral response to pain
Scn10a	sodium channel, voltage-gated, type X, alpha [Source:MGI Symbol;Acc:MGI:108029]	GO:0050974	detection of mechanical stimulus involved in sensory perception
Scn10a	sodium channel, voltage-gated, type X, alpha [Source:MGI Symbol;Acc:MGI:108029]	GO:0044299	C-fiber
Scn10a	sodium channel, voltage-gated, type X, alpha [Source:MGI Symbol;Acc:MGI:108029]	GO:0086006	voltage-gated sodium channel activity involved in cardiac muscle cell action potential
Scn10a	sodium channel, voltage-gated, type X, alpha [Source:MGI Symbol;Acc:MGI:108029]	GO:0086012	membrane depolarization during cardiac muscle cell action potential
Scn10a	sodium channel, voltage-gated, type X, alpha [Source:MGI Symbol;Acc:MGI:108029]
Tph2	tryptophan hydroxylase 2 [Source:MGI Symbol;Acc:MGI:2651811]	GO:0004497	monooxygenase activity
Tph2	tryptophan hydroxylase 2 [Source:MGI Symbol;Acc:MGI:2651811]	GO:0005506	iron ion binding
Tph2	tryptophan hydroxylase 2 [Source:MGI Symbol;Acc:MGI:2651811]	GO:0009072	aromatic amino acid metabolic process
Tph2	tryptophan hydroxylase 2 [Source:MGI Symbol;Acc:MGI:2651811]	GO:0004510	tryptophan 5-monooxygenase activity
Tph2	tryptophan hydroxylase 2 [Source:MGI Symbol;Acc:MGI:2651811]	GO:0042427	serotonin biosynthetic process
Tph2	tryptophan hydroxylase 2 [Source:MGI Symbol;Acc:MGI:2651811]	GO:0016714	oxidoreductase activity, acting on paired donors, with incorporation or reduction of molecular oxygen, reduced pteridine as one donor, and incorporation of one atom of oxygen
Tph2	tryptophan hydroxylase 2 [Source:MGI Symbol;Acc:MGI:2651811]	GO:0046872	metal ion binding
Tph2	tryptophan hydroxylase 2 [Source:MGI Symbol;Acc:MGI:2651811]	GO:0043005	neuron projection
Tph2	tryptophan hydroxylase 2 [Source:MGI Symbol;Acc:MGI:2651811]	GO:0006587	serotonin biosynthetic process from tryptophan
Tph2	tryptophan hydroxylase 2 [Source:MGI Symbol;Acc:MGI:2651811]
Itgam	integrin alpha M [Source:MGI Symbol;Acc:MGI:96607]	GO:0007155	cell adhesion
Itgam	integrin alpha M [Source:MGI Symbol;Acc:MGI:96607]	GO:0008305	integrin complex
Itgam	integrin alpha M [Source:MGI Symbol;Acc:MGI:96607]	GO:0016020	membrane
Itgam	integrin alpha M [Source:MGI Symbol;Acc:MGI:96607]	GO:0046872	metal ion binding
Itgam	integrin alpha M [Source:MGI Symbol;Acc:MGI:96607]	GO:0007229	integrin-mediated signaling pathway
Itgam	integrin alpha M [Source:MGI Symbol;Acc:MGI:96607]	GO:0031072	heat shock protein binding
Itgam	integrin alpha M [Source:MGI Symbol;Acc:MGI:96607]	GO:0044877	protein-containing complex binding
Itgam	integrin alpha M [Source:MGI Symbol;Acc:MGI:96607]	GO:0002931	response to ischemia
Itgam	integrin alpha M [Source:MGI Symbol;Acc:MGI:96607]	GO:0007160	cell-matrix adhesion
Itgam	integrin alpha M [Source:MGI Symbol;Acc:MGI:96607]	GO:0009612	response to mechanical stimulus
Itgam	integrin alpha M [Source:MGI Symbol;Acc:MGI:96607]	GO:0010668	ectodermal cell differentiation
Itgam	integrin alpha M [Source:MGI Symbol;Acc:MGI:96607]	GO:0032355	response to estradiol
Itgam	integrin alpha M [Source:MGI Symbol;Acc:MGI:96607]	GO:0032930	positive regulation of superoxide anion generation
Itgam	integrin alpha M [Source:MGI Symbol;Acc:MGI:96607]	GO:0034113	heterotypic cell-cell adhesion
Itgam	integrin alpha M [Source:MGI Symbol;Acc:MGI:96607]	GO:0043315	positive regulation of neutrophil degranulation
Itgam	integrin alpha M [Source:MGI Symbol;Acc:MGI:96607]	GO:0140459	response to Gram-positive bacterium
Itgam	integrin alpha M [Source:MGI Symbol;Acc:MGI:96607]	GO:1904643	response to curcumin
Itgam	integrin alpha M [Source:MGI Symbol;Acc:MGI:96607]	GO:0005615	extracellular space
Itgam	integrin alpha M [Source:MGI Symbol;Acc:MGI:96607]	GO:0005886	plasma membrane
Itgam	integrin alpha M [Source:MGI Symbol;Acc:MGI:96607]	GO:0009986	cell surface
Itgam	integrin alpha M [Source:MGI Symbol;Acc:MGI:96607]	GO:0044853	plasma membrane raft
Itgam	integrin alpha M [Source:MGI Symbol;Acc:MGI:96607]	GO:0034688	integrin alphaM-beta2 complex
Itgam	integrin alpha M [Source:MGI Symbol;Acc:MGI:96607]
Pkp1	plakophilin 1 [Source:MGI Symbol;Acc:MGI:1328359]	GO:0005515	protein binding
Pkp1	plakophilin 1 [Source:MGI Symbol;Acc:MGI:1328359]	GO:0098609	cell-cell adhesion
Pkp1	plakophilin 1 [Source:MGI Symbol;Acc:MGI:1328359]	GO:0005634	nucleus
Pkp1	plakophilin 1 [Source:MGI Symbol;Acc:MGI:1328359]	GO:0045944	positive regulation of transcription by RNA polymerase II
Pkp1	plakophilin 1 [Source:MGI Symbol;Acc:MGI:1328359]	GO:0005737	cytoplasm
Pkp1	plakophilin 1 [Source:MGI Symbol;Acc:MGI:1328359]	GO:0005886	plasma membrane
Pkp1	plakophilin 1 [Source:MGI Symbol;Acc:MGI:1328359]	GO:0003677	DNA binding
Pkp1	plakophilin 1 [Source:MGI Symbol;Acc:MGI:1328359]	GO:0003723	RNA binding
Pkp1	plakophilin 1 [Source:MGI Symbol;Acc:MGI:1328359]	GO:0007155	cell adhesion
Pkp1	plakophilin 1 [Source:MGI Symbol;Acc:MGI:1328359]	GO:0048471	perinuclear region of cytoplasm
Pkp1	plakophilin 1 [Source:MGI Symbol;Acc:MGI:1328359]	GO:0045296	cadherin binding
Pkp1	plakophilin 1 [Source:MGI Symbol;Acc:MGI:1328359]	GO:0005912	adherens junction
Pkp1	plakophilin 1 [Source:MGI Symbol;Acc:MGI:1328359]	GO:0030057	desmosome
Pkp1	plakophilin 1 [Source:MGI Symbol;Acc:MGI:1328359]	GO:0001533	cornified envelope
Pkp1	plakophilin 1 [Source:MGI Symbol;Acc:MGI:1328359]	GO:1903078	positive regulation of protein localization to plasma membrane
Pkp1	plakophilin 1 [Source:MGI Symbol;Acc:MGI:1328359]	GO:0045618	positive regulation of keratinocyte differentiation
Pkp1	plakophilin 1 [Source:MGI Symbol;Acc:MGI:1328359]	GO:0036305	ameloblast differentiation
Pkp1	plakophilin 1 [Source:MGI Symbol;Acc:MGI:1328359]	GO:0035377	transepithelial water transport
Pkp1	plakophilin 1 [Source:MGI Symbol;Acc:MGI:1328359]	GO:0097165	nuclear stress granule
Pkp1	plakophilin 1 [Source:MGI Symbol;Acc:MGI:1328359]	GO:0022409	positive regulation of cell-cell adhesion
Pkp1	plakophilin 1 [Source:MGI Symbol;Acc:MGI:1328359]	GO:0005521	lamin binding
Pkp1	plakophilin 1 [Source:MGI Symbol;Acc:MGI:1328359]	GO:0002159	desmosome assembly
Pkp1	plakophilin 1 [Source:MGI Symbol;Acc:MGI:1328359]	GO:0002160	desmosome maintenance
Pkp1	plakophilin 1 [Source:MGI Symbol;Acc:MGI:1328359]	GO:0010628	positive regulation of gene expression
Pkp1	plakophilin 1 [Source:MGI Symbol;Acc:MGI:1328359]	GO:0045110	intermediate filament bundle assembly
Pkp1	plakophilin 1 [Source:MGI Symbol;Acc:MGI:1328359]	GO:1902373	negative regulation of mRNA catabolic process
Pkp1	plakophilin 1 [Source:MGI Symbol;Acc:MGI:1328359]	GO:1903676	positive regulation of cap-dependent translational initiation
Pkp1	plakophilin 1 [Source:MGI Symbol;Acc:MGI:1328359]	GO:1905477	positive regulation of protein localization to membrane
Pkp1	plakophilin 1 [Source:MGI Symbol;Acc:MGI:1328359]	GO:0005654	nucleoplasm
Pkp1	plakophilin 1 [Source:MGI Symbol;Acc:MGI:1328359]
Ngfr	nerve growth factor receptor (TNFR superfamily, member 16) [Source:MGI Symbol;Acc:MGI:97323]	GO:0005515	protein binding
Ngfr	nerve growth factor receptor (TNFR superfamily, member 16) [Source:MGI Symbol;Acc:MGI:97323]	GO:0007165	signal transduction
Ngfr	nerve growth factor receptor (TNFR superfamily, member 16) [Source:MGI Symbol;Acc:MGI:97323]	GO:0043066	negative regulation of apoptotic process
Ngfr	nerve growth factor receptor (TNFR superfamily, member 16) [Source:MGI Symbol;Acc:MGI:97323]	GO:0048146	positive regulation of fibroblast proliferation
Ngfr	nerve growth factor receptor (TNFR superfamily, member 16) [Source:MGI Symbol;Acc:MGI:97323]	GO:0010468	regulation of gene expression
Ngfr	nerve growth factor receptor (TNFR superfamily, member 16) [Source:MGI Symbol;Acc:MGI:97323]	GO:0043524	negative regulation of neuron apoptotic process
Ngfr	nerve growth factor receptor (TNFR superfamily, member 16) [Source:MGI Symbol;Acc:MGI:97323]	GO:0044877	protein-containing complex binding
Ngfr	nerve growth factor receptor (TNFR superfamily, member 16) [Source:MGI Symbol;Acc:MGI:97323]	GO:0007417	central nervous system development
Ngfr	nerve growth factor receptor (TNFR superfamily, member 16) [Source:MGI Symbol;Acc:MGI:97323]	GO:0010976	positive regulation of neuron projection development
Ngfr	nerve growth factor receptor (TNFR superfamily, member 16) [Source:MGI Symbol;Acc:MGI:97323]	GO:0045666	positive regulation of neuron differentiation
Ngfr	nerve growth factor receptor (TNFR superfamily, member 16) [Source:MGI Symbol;Acc:MGI:97323]	GO:0014069	postsynaptic density
Ngfr	nerve growth factor receptor (TNFR superfamily, member 16) [Source:MGI Symbol;Acc:MGI:97323]	GO:0051897	positive regulation of phosphatidylinositol 3-kinase/protein kinase B signal transduction
Ngfr	nerve growth factor receptor (TNFR superfamily, member 16) [Source:MGI Symbol;Acc:MGI:97323]	GO:0016525	negative regulation of angiogenesis
Ngfr	nerve growth factor receptor (TNFR superfamily, member 16) [Source:MGI Symbol;Acc:MGI:97323]	GO:0005737	cytoplasm
Ngfr	nerve growth factor receptor (TNFR superfamily, member 16) [Source:MGI Symbol;Acc:MGI:97323]	GO:0031643	positive regulation of myelination
Ngfr	nerve growth factor receptor (TNFR superfamily, member 16) [Source:MGI Symbol;Acc:MGI:97323]	GO:0043588	skin development
Ngfr	nerve growth factor receptor (TNFR superfamily, member 16) [Source:MGI Symbol;Acc:MGI:97323]	GO:0010977	negative regulation of neuron projection development
Ngfr	nerve growth factor receptor (TNFR superfamily, member 16) [Source:MGI Symbol;Acc:MGI:97323]	GO:0042995	cell projection
Ngfr	nerve growth factor receptor (TNFR superfamily, member 16) [Source:MGI Symbol;Acc:MGI:97323]	GO:0016020	membrane
Ngfr	nerve growth factor receptor (TNFR superfamily, member 16) [Source:MGI Symbol;Acc:MGI:97323]	GO:0005886	plasma membrane
Ngfr	nerve growth factor receptor (TNFR superfamily, member 16) [Source:MGI Symbol;Acc:MGI:97323]	GO:0009897	external side of plasma membrane
Ngfr	nerve growth factor receptor (TNFR superfamily, member 16) [Source:MGI Symbol;Acc:MGI:97323]	GO:0009986	cell surface
Ngfr	nerve growth factor receptor (TNFR superfamily, member 16) [Source:MGI Symbol;Acc:MGI:97323]	GO:0007399	nervous system development
Ngfr	nerve growth factor receptor (TNFR superfamily, member 16) [Source:MGI Symbol;Acc:MGI:97323]	GO:0030154	cell differentiation
Ngfr	nerve growth factor receptor (TNFR superfamily, member 16) [Source:MGI Symbol;Acc:MGI:97323]	GO:0045202	synapse
Ngfr	nerve growth factor receptor (TNFR superfamily, member 16) [Source:MGI Symbol;Acc:MGI:97323]	GO:0030426	growth cone
Ngfr	nerve growth factor receptor (TNFR superfamily, member 16) [Source:MGI Symbol;Acc:MGI:97323]	GO:0043204	perikaryon
Ngfr	nerve growth factor receptor (TNFR superfamily, member 16) [Source:MGI Symbol;Acc:MGI:97323]	GO:0005911	cell-cell junction
Ngfr	nerve growth factor receptor (TNFR superfamily, member 16) [Source:MGI Symbol;Acc:MGI:97323]	GO:0005516	calmodulin binding
Ngfr	nerve growth factor receptor (TNFR superfamily, member 16) [Source:MGI Symbol;Acc:MGI:97323]	GO:0006915	apoptotic process
Ngfr	nerve growth factor receptor (TNFR superfamily, member 16) [Source:MGI Symbol;Acc:MGI:97323]	GO:0048511	rhythmic process
Ngfr	nerve growth factor receptor (TNFR superfamily, member 16) [Source:MGI Symbol;Acc:MGI:97323]	GO:0043410	positive regulation of MAPK cascade
Ngfr	nerve growth factor receptor (TNFR superfamily, member 16) [Source:MGI Symbol;Acc:MGI:97323]	GO:0043197	dendritic spine
Ngfr	nerve growth factor receptor (TNFR superfamily, member 16) [Source:MGI Symbol;Acc:MGI:97323]	GO:0006886	intracellular protein transport
Ngfr	nerve growth factor receptor (TNFR superfamily, member 16) [Source:MGI Symbol;Acc:MGI:97323]	GO:0007623	circadian rhythm
Ngfr	nerve growth factor receptor (TNFR superfamily, member 16) [Source:MGI Symbol;Acc:MGI:97323]	GO:0042802	identical protein binding
Ngfr	nerve growth factor receptor (TNFR superfamily, member 16) [Source:MGI Symbol;Acc:MGI:97323]	GO:0031594	neuromuscular junction
Ngfr	nerve growth factor receptor (TNFR superfamily, member 16) [Source:MGI Symbol;Acc:MGI:97323]	GO:0043065	positive regulation of apoptotic process
Ngfr	nerve growth factor receptor (TNFR superfamily, member 16) [Source:MGI Symbol;Acc:MGI:97323]	GO:0031267	small GTPase binding
Ngfr	nerve growth factor receptor (TNFR superfamily, member 16) [Source:MGI Symbol;Acc:MGI:97323]	GO:0051241	negative regulation of multicellular organismal process
Ngfr	nerve growth factor receptor (TNFR superfamily, member 16) [Source:MGI Symbol;Acc:MGI:97323]	GO:0048144	fibroblast proliferation
Ngfr	nerve growth factor receptor (TNFR superfamily, member 16) [Source:MGI Symbol;Acc:MGI:97323]	GO:0016048	detection of temperature stimulus
Ngfr	nerve growth factor receptor (TNFR superfamily, member 16) [Source:MGI Symbol;Acc:MGI:97323]	GO:0061000	negative regulation of dendritic spine development
Ngfr	nerve growth factor receptor (TNFR superfamily, member 16) [Source:MGI Symbol;Acc:MGI:97323]	GO:0099171	presynaptic modulation of chemical synaptic transmission
Ngfr	nerve growth factor receptor (TNFR superfamily, member 16) [Source:MGI Symbol;Acc:MGI:97323]	GO:0042734	presynaptic membrane
Ngfr	nerve growth factor receptor (TNFR superfamily, member 16) [Source:MGI Symbol;Acc:MGI:97323]	GO:0021675	nerve development
Ngfr	nerve growth factor receptor (TNFR superfamily, member 16) [Source:MGI Symbol;Acc:MGI:97323]	GO:0001540	amyloid-beta binding
Ngfr	nerve growth factor receptor (TNFR superfamily, member 16) [Source:MGI Symbol;Acc:MGI:97323]	GO:0001942	hair follicle development
Ngfr	nerve growth factor receptor (TNFR superfamily, member 16) [Source:MGI Symbol;Acc:MGI:97323]	GO:0032922	circadian regulation of gene expression
Ngfr	nerve growth factor receptor (TNFR superfamily, member 16) [Source:MGI Symbol;Acc:MGI:97323]	GO:0032809	neuronal cell body membrane
Ngfr	nerve growth factor receptor (TNFR superfamily, member 16) [Source:MGI Symbol;Acc:MGI:97323]	GO:0032590	dendrite membrane
Ngfr	nerve growth factor receptor (TNFR superfamily, member 16) [Source:MGI Symbol;Acc:MGI:97323]	GO:0034599	cellular response to oxidative stress
Ngfr	nerve growth factor receptor (TNFR superfamily, member 16) [Source:MGI Symbol;Acc:MGI:97323]	GO:2000463	positive regulation of excitatory postsynaptic potential
Ngfr	nerve growth factor receptor (TNFR superfamily, member 16) [Source:MGI Symbol;Acc:MGI:97323]	GO:2000179	positive regulation of neural precursor cell proliferation
Ngfr	nerve growth factor receptor (TNFR superfamily, member 16) [Source:MGI Symbol;Acc:MGI:97323]	GO:0008543	fibroblast growth factor receptor signaling pathway
Ngfr	nerve growth factor receptor (TNFR superfamily, member 16) [Source:MGI Symbol;Acc:MGI:97323]	GO:0040037	negative regulation of fibroblast growth factor receptor signaling pathway
Ngfr	nerve growth factor receptor (TNFR superfamily, member 16) [Source:MGI Symbol;Acc:MGI:97323]	GO:0005635	nuclear envelope
Ngfr	nerve growth factor receptor (TNFR superfamily, member 16) [Source:MGI Symbol;Acc:MGI:97323]	GO:0042475	odontogenesis of dentin-containing tooth
Ngfr	nerve growth factor receptor (TNFR superfamily, member 16) [Source:MGI Symbol;Acc:MGI:97323]	GO:0007411	axon guidance
Ngfr	nerve growth factor receptor (TNFR superfamily, member 16) [Source:MGI Symbol;Acc:MGI:97323]	GO:2001235	positive regulation of apoptotic signaling pathway
Ngfr	nerve growth factor receptor (TNFR superfamily, member 16) [Source:MGI Symbol;Acc:MGI:97323]	GO:0001678	intracellular glucose homeostasis
Ngfr	nerve growth factor receptor (TNFR superfamily, member 16) [Source:MGI Symbol;Acc:MGI:97323]	GO:0031069	hair follicle morphogenesis
Ngfr	nerve growth factor receptor (TNFR superfamily, member 16) [Source:MGI Symbol;Acc:MGI:97323]	GO:0042593	glucose homeostasis
Ngfr	nerve growth factor receptor (TNFR superfamily, member 16) [Source:MGI Symbol;Acc:MGI:97323]	GO:0051968	positive regulation of synaptic transmission, glutamatergic
Ngfr	nerve growth factor receptor (TNFR superfamily, member 16) [Source:MGI Symbol;Acc:MGI:97323]	GO:0007266	Rho protein signal transduction
Ngfr	nerve growth factor receptor (TNFR superfamily, member 16) [Source:MGI Symbol;Acc:MGI:97323]	GO:0032224	positive regulation of synaptic transmission, cholinergic
Ngfr	nerve growth factor receptor (TNFR superfamily, member 16) [Source:MGI Symbol;Acc:MGI:97323]	GO:0051902	negative regulation of mitochondrial depolarization
Ngfr	nerve growth factor receptor (TNFR superfamily, member 16) [Source:MGI Symbol;Acc:MGI:97323]	GO:0035025	positive regulation of Rho protein signal transduction
Ngfr	nerve growth factor receptor (TNFR superfamily, member 16) [Source:MGI Symbol;Acc:MGI:97323]	GO:2000377	regulation of reactive oxygen species metabolic process
Ngfr	nerve growth factor receptor (TNFR superfamily, member 16) [Source:MGI Symbol;Acc:MGI:97323]	GO:0042488	positive regulation of odontogenesis of dentin-containing tooth
Ngfr	nerve growth factor receptor (TNFR superfamily, member 16) [Source:MGI Symbol;Acc:MGI:97323]	GO:0043121	neurotrophin binding
Ngfr	nerve growth factor receptor (TNFR superfamily, member 16) [Source:MGI Symbol;Acc:MGI:97323]	GO:0048406	nerve growth factor binding
Ngfr	nerve growth factor receptor (TNFR superfamily, member 16) [Source:MGI Symbol;Acc:MGI:97323]	GO:0045334	clathrin-coated endocytic vesicle
Ngfr	nerve growth factor receptor (TNFR superfamily, member 16) [Source:MGI Symbol;Acc:MGI:97323]	GO:0051799	negative regulation of hair follicle development
Ngfr	nerve growth factor receptor (TNFR superfamily, member 16) [Source:MGI Symbol;Acc:MGI:97323]	GO:0035907	dorsal aorta development
Ngfr	nerve growth factor receptor (TNFR superfamily, member 16) [Source:MGI Symbol;Acc:MGI:97323]	GO:0015026	coreceptor activity
Ngfr	nerve growth factor receptor (TNFR superfamily, member 16) [Source:MGI Symbol;Acc:MGI:97323]	GO:0005035	death receptor activity
Ngfr	nerve growth factor receptor (TNFR superfamily, member 16) [Source:MGI Symbol;Acc:MGI:97323]	GO:0070678	preprotein binding
Ngfr	nerve growth factor receptor (TNFR superfamily, member 16) [Source:MGI Symbol;Acc:MGI:97323]	GO:0005168	neurotrophin TRKA receptor binding
Ngfr	nerve growth factor receptor (TNFR superfamily, member 16) [Source:MGI Symbol;Acc:MGI:97323]	GO:0031625	ubiquitin protein ligase binding
Ngfr	nerve growth factor receptor (TNFR superfamily, member 16) [Source:MGI Symbol;Acc:MGI:97323]	GO:0030336	negative regulation of cell migration
Ngfr	nerve growth factor receptor (TNFR superfamily, member 16) [Source:MGI Symbol;Acc:MGI:97323]	GO:0051402	neuron apoptotic process
Ngfr	nerve growth factor receptor (TNFR superfamily, member 16) [Source:MGI Symbol;Acc:MGI:97323]	GO:1900182	positive regulation of protein localization to nucleus
Ngfr	nerve growth factor receptor (TNFR superfamily, member 16) [Source:MGI Symbol;Acc:MGI:97323]	GO:1902895	positive regulation of miRNA transcription
Ngfr	nerve growth factor receptor (TNFR superfamily, member 16) [Source:MGI Symbol;Acc:MGI:97323]	GO:1903588	negative regulation of blood vessel endothelial cell proliferation involved in sprouting angiogenesis
Ngfr	nerve growth factor receptor (TNFR superfamily, member 16) [Source:MGI Symbol;Acc:MGI:97323]	GO:1904646	cellular response to amyloid-beta
Ngfr	nerve growth factor receptor (TNFR superfamily, member 16) [Source:MGI Symbol;Acc:MGI:97323]	GO:0005654	nucleoplasm
Fgf3	fibroblast growth factor 3 [Source:MGI Symbol;Acc:MGI:95517]	GO:0008083	growth factor activity
Fgf3	fibroblast growth factor 3 [Source:MGI Symbol;Acc:MGI:95517]	GO:0030154	cell differentiation
Fgf3	fibroblast growth factor 3 [Source:MGI Symbol;Acc:MGI:95517]	GO:0007165	signal transduction
Fgf3	fibroblast growth factor 3 [Source:MGI Symbol;Acc:MGI:95517]	GO:0051781	positive regulation of cell division
Fgf3	fibroblast growth factor 3 [Source:MGI Symbol;Acc:MGI:95517]	GO:0008284	positive regulation of cell population proliferation
Fgf3	fibroblast growth factor 3 [Source:MGI Symbol;Acc:MGI:95517]	GO:0008543	fibroblast growth factor receptor signaling pathway
Fgf3	fibroblast growth factor 3 [Source:MGI Symbol;Acc:MGI:95517]	GO:0055026	negative regulation of cardiac muscle tissue development
Trem2	triggering receptor expressed on myeloid cells 2 [Source:MGI Symbol;Acc:MGI:1913150]	GO:0071456	cellular response to hypoxia
Trem2	triggering receptor expressed on myeloid cells 2 [Source:MGI Symbol;Acc:MGI:1913150]	GO:0005515	protein binding
Trem2	triggering receptor expressed on myeloid cells 2 [Source:MGI Symbol;Acc:MGI:1913150]	GO:0071333	cellular response to glucose stimulus
Trem2	triggering receptor expressed on myeloid cells 2 [Source:MGI Symbol;Acc:MGI:1913150]	GO:0005886	plasma membrane
Trem2	triggering receptor expressed on myeloid cells 2 [Source:MGI Symbol;Acc:MGI:1913150]	GO:0042742	defense response to bacterium
Trem2	triggering receptor expressed on myeloid cells 2 [Source:MGI Symbol;Acc:MGI:1913150]	GO:0005576	extracellular region
Trem2	triggering receptor expressed on myeloid cells 2 [Source:MGI Symbol;Acc:MGI:1913150]	GO:0010468	regulation of gene expression
Trem2	triggering receptor expressed on myeloid cells 2 [Source:MGI Symbol;Acc:MGI:1913150]	GO:0008289	lipid binding
Trem2	triggering receptor expressed on myeloid cells 2 [Source:MGI Symbol;Acc:MGI:1913150]	GO:0045088	regulation of innate immune response
Trem2	triggering receptor expressed on myeloid cells 2 [Source:MGI Symbol;Acc:MGI:1913150]	GO:0030316	osteoclast differentiation
Trem2	triggering receptor expressed on myeloid cells 2 [Source:MGI Symbol;Acc:MGI:1913150]	GO:0071526	semaphorin-plexin signaling pathway
Trem2	triggering receptor expressed on myeloid cells 2 [Source:MGI Symbol;Acc:MGI:1913150]	GO:0070374	positive regulation of ERK1 and ERK2 cascade
Trem2	triggering receptor expressed on myeloid cells 2 [Source:MGI Symbol;Acc:MGI:1913150]	GO:0043066	negative regulation of apoptotic process
Trem2	triggering receptor expressed on myeloid cells 2 [Source:MGI Symbol;Acc:MGI:1913150]	GO:0017154	semaphorin receptor activity
Trem2	triggering receptor expressed on myeloid cells 2 [Source:MGI Symbol;Acc:MGI:1913150]	GO:0010628	positive regulation of gene expression
Trem2	triggering receptor expressed on myeloid cells 2 [Source:MGI Symbol;Acc:MGI:1913150]	GO:0045672	positive regulation of osteoclast differentiation
Trem2	triggering receptor expressed on myeloid cells 2 [Source:MGI Symbol;Acc:MGI:1913150]	GO:0002931	response to ischemia
Trem2	triggering receptor expressed on myeloid cells 2 [Source:MGI Symbol;Acc:MGI:1913150]	GO:0032733	positive regulation of interleukin-10 production
Trem2	triggering receptor expressed on myeloid cells 2 [Source:MGI Symbol;Acc:MGI:1913150]	GO:0032720	negative regulation of tumor necrosis factor production
Trem2	triggering receptor expressed on myeloid cells 2 [Source:MGI Symbol;Acc:MGI:1913150]	GO:0051898	negative regulation of phosphatidylinositol 3-kinase/protein kinase B signal transduction
Trem2	triggering receptor expressed on myeloid cells 2 [Source:MGI Symbol;Acc:MGI:1913150]	GO:0001786	phosphatidylserine binding
Trem2	triggering receptor expressed on myeloid cells 2 [Source:MGI Symbol;Acc:MGI:1913150]	GO:1901224	positive regulation of non-canonical NF-kappaB signal transduction
Trem2	triggering receptor expressed on myeloid cells 2 [Source:MGI Symbol;Acc:MGI:1913150]	GO:1904646	cellular response to amyloid-beta
Trem2	triggering receptor expressed on myeloid cells 2 [Source:MGI Symbol;Acc:MGI:1913150]	GO:0002282	microglial cell activation involved in immune response
Trem2	triggering receptor expressed on myeloid cells 2 [Source:MGI Symbol;Acc:MGI:1913150]	GO:0002291	T cell activation via T cell receptor contact with antigen bound to MHC molecule on antigen presenting cell
Trem2	triggering receptor expressed on myeloid cells 2 [Source:MGI Symbol;Acc:MGI:1913150]	GO:0034241	positive regulation of macrophage fusion
Trem2	triggering receptor expressed on myeloid cells 2 [Source:MGI Symbol;Acc:MGI:1913150]	GO:0043277	apoptotic cell clearance
Trem2	triggering receptor expressed on myeloid cells 2 [Source:MGI Symbol;Acc:MGI:1913150]	GO:0048678	response to axon injury
Trem2	triggering receptor expressed on myeloid cells 2 [Source:MGI Symbol;Acc:MGI:1913150]	GO:1903980	positive regulation of microglial cell activation
Trem2	triggering receptor expressed on myeloid cells 2 [Source:MGI Symbol;Acc:MGI:1913150]	GO:0001774	microglial cell activation
Trem2	triggering receptor expressed on myeloid cells 2 [Source:MGI Symbol;Acc:MGI:1913150]	GO:0006911	phagocytosis, engulfment
Trem2	triggering receptor expressed on myeloid cells 2 [Source:MGI Symbol;Acc:MGI:1913150]	GO:0150076	neuroinflammatory response
Trem2	triggering receptor expressed on myeloid cells 2 [Source:MGI Symbol;Acc:MGI:1913150]	GO:0005543	phospholipid binding
Trem2	triggering receptor expressed on myeloid cells 2 [Source:MGI Symbol;Acc:MGI:1913150]	GO:0060100	positive regulation of phagocytosis, engulfment
Trem2	triggering receptor expressed on myeloid cells 2 [Source:MGI Symbol;Acc:MGI:1913150]	GO:0048143	astrocyte activation
Trem2	triggering receptor expressed on myeloid cells 2 [Source:MGI Symbol;Acc:MGI:1913150]	GO:0050766	positive regulation of phagocytosis
Trem2	triggering receptor expressed on myeloid cells 2 [Source:MGI Symbol;Acc:MGI:1913150]	GO:0038023	signaling receptor activity
Trem2	triggering receptor expressed on myeloid cells 2 [Source:MGI Symbol;Acc:MGI:1913150]	GO:0050730	regulation of peptidyl-tyrosine phosphorylation
Trem2	triggering receptor expressed on myeloid cells 2 [Source:MGI Symbol;Acc:MGI:1913150]	GO:1900223	positive regulation of amyloid-beta clearance
Trem2	triggering receptor expressed on myeloid cells 2 [Source:MGI Symbol;Acc:MGI:1913150]	GO:2001171	positive regulation of ATP biosynthetic process
Trem2	triggering receptor expressed on myeloid cells 2 [Source:MGI Symbol;Acc:MGI:1913150]	GO:0010875	positive regulation of cholesterol efflux
Trem2	triggering receptor expressed on myeloid cells 2 [Source:MGI Symbol;Acc:MGI:1913150]	GO:0004888	transmembrane signaling receptor activity
Trem2	triggering receptor expressed on myeloid cells 2 [Source:MGI Symbol;Acc:MGI:1913150]	GO:0001530	lipopolysaccharide binding
Trem2	triggering receptor expressed on myeloid cells 2 [Source:MGI Symbol;Acc:MGI:1913150]	GO:0150079	negative regulation of neuroinflammatory response
Trem2	triggering receptor expressed on myeloid cells 2 [Source:MGI Symbol;Acc:MGI:1913150]	GO:0050829	defense response to Gram-negative bacterium
Trem2	triggering receptor expressed on myeloid cells 2 [Source:MGI Symbol;Acc:MGI:1913150]	GO:0061889	negative regulation of astrocyte activation
Trem2	triggering receptor expressed on myeloid cells 2 [Source:MGI Symbol;Acc:MGI:1913150]	GO:0150094	amyloid-beta clearance by cellular catabolic process
Trem2	triggering receptor expressed on myeloid cells 2 [Source:MGI Symbol;Acc:MGI:1913150]	GO:1905907	negative regulation of amyloid fibril formation
Trem2	triggering receptor expressed on myeloid cells 2 [Source:MGI Symbol;Acc:MGI:1913150]	GO:0045087	innate immune response
Trem2	triggering receptor expressed on myeloid cells 2 [Source:MGI Symbol;Acc:MGI:1913150]	GO:0001934	positive regulation of protein phosphorylation
Trem2	triggering receptor expressed on myeloid cells 2 [Source:MGI Symbol;Acc:MGI:1913150]	GO:0030215	semaphorin receptor binding
Trem2	triggering receptor expressed on myeloid cells 2 [Source:MGI Symbol;Acc:MGI:1913150]	GO:0120035	regulation of plasma membrane bounded cell projection organization
Trem2	triggering receptor expressed on myeloid cells 2 [Source:MGI Symbol;Acc:MGI:1913150]	GO:1900016	negative regulation of cytokine production involved in inflammatory response
Trem2	triggering receptor expressed on myeloid cells 2 [Source:MGI Symbol;Acc:MGI:1913150]	GO:0032691	negative regulation of interleukin-1 beta production
Trem2	triggering receptor expressed on myeloid cells 2 [Source:MGI Symbol;Acc:MGI:1913150]	GO:0061518	microglial cell proliferation
Trem2	triggering receptor expressed on myeloid cells 2 [Source:MGI Symbol;Acc:MGI:1913150]	GO:1901800	positive regulation of proteasomal protein catabolic process
Trem2	triggering receptor expressed on myeloid cells 2 [Source:MGI Symbol;Acc:MGI:1913150]	GO:1990782	protein tyrosine kinase binding
Trem2	triggering receptor expressed on myeloid cells 2 [Source:MGI Symbol;Acc:MGI:1913150]	GO:1900226	negative regulation of NLRP3 inflammasome complex assembly
Trem2	triggering receptor expressed on myeloid cells 2 [Source:MGI Symbol;Acc:MGI:1913150]	GO:0070269	pyroptosis
Trem2	triggering receptor expressed on myeloid cells 2 [Source:MGI Symbol;Acc:MGI:1913150]	GO:0038160	CXCL12-activated CXCR4 signaling pathway
Trem2	triggering receptor expressed on myeloid cells 2 [Source:MGI Symbol;Acc:MGI:1913150]	GO:0035176	social behavior
Trem2	triggering receptor expressed on myeloid cells 2 [Source:MGI Symbol;Acc:MGI:1913150]	GO:0019209	kinase activator activity
Trem2	triggering receptor expressed on myeloid cells 2 [Source:MGI Symbol;Acc:MGI:1913150]	GO:0042834	peptidoglycan binding
Trem2	triggering receptor expressed on myeloid cells 2 [Source:MGI Symbol;Acc:MGI:1913150]	GO:0070891	lipoteichoic acid binding
Trem2	triggering receptor expressed on myeloid cells 2 [Source:MGI Symbol;Acc:MGI:1913150]	GO:0120146	sulfatide binding
Trem2	triggering receptor expressed on myeloid cells 2 [Source:MGI Symbol;Acc:MGI:1913150]	GO:0002862	negative regulation of inflammatory response to antigenic stimulus
Trem2	triggering receptor expressed on myeloid cells 2 [Source:MGI Symbol;Acc:MGI:1913150]	GO:0010507	negative regulation of autophagy
Trem2	triggering receptor expressed on myeloid cells 2 [Source:MGI Symbol;Acc:MGI:1913150]	GO:0010887	negative regulation of cholesterol storage
Trem2	triggering receptor expressed on myeloid cells 2 [Source:MGI Symbol;Acc:MGI:1913150]	GO:0010891	negative regulation of sequestering of triglyceride
Trem2	triggering receptor expressed on myeloid cells 2 [Source:MGI Symbol;Acc:MGI:1913150]	GO:0010983	positive regulation of high-density lipoprotein particle clearance
Trem2	triggering receptor expressed on myeloid cells 2 [Source:MGI Symbol;Acc:MGI:1913150]	GO:0031663	lipopolysaccharide-mediated signaling pathway
Trem2	triggering receptor expressed on myeloid cells 2 [Source:MGI Symbol;Acc:MGI:1913150]	GO:0032006	regulation of TOR signaling
Trem2	triggering receptor expressed on myeloid cells 2 [Source:MGI Symbol;Acc:MGI:1913150]	GO:0032008	positive regulation of TOR signaling
Trem2	triggering receptor expressed on myeloid cells 2 [Source:MGI Symbol;Acc:MGI:1913150]	GO:0032497	detection of lipopolysaccharide
Trem2	triggering receptor expressed on myeloid cells 2 [Source:MGI Symbol;Acc:MGI:1913150]	GO:0032499	detection of peptidoglycan
Trem2	triggering receptor expressed on myeloid cells 2 [Source:MGI Symbol;Acc:MGI:1913150]	GO:0032675	regulation of interleukin-6 production
Trem2	triggering receptor expressed on myeloid cells 2 [Source:MGI Symbol;Acc:MGI:1913150]	GO:0034136	negative regulation of toll-like receptor 2 signaling pathway
Trem2	triggering receptor expressed on myeloid cells 2 [Source:MGI Symbol;Acc:MGI:1913150]	GO:0034144	negative regulation of toll-like receptor 4 signaling pathway
Trem2	triggering receptor expressed on myeloid cells 2 [Source:MGI Symbol;Acc:MGI:1913150]	GO:0034151	regulation of toll-like receptor 6 signaling pathway
Trem2	triggering receptor expressed on myeloid cells 2 [Source:MGI Symbol;Acc:MGI:1913150]	GO:0034351	negative regulation of glial cell apoptotic process
Trem2	triggering receptor expressed on myeloid cells 2 [Source:MGI Symbol;Acc:MGI:1913150]	GO:0043124	negative regulation of canonical NF-kappaB signal transduction
Trem2	triggering receptor expressed on myeloid cells 2 [Source:MGI Symbol;Acc:MGI:1913150]	GO:0045728	respiratory burst after phagocytosis
Trem2	triggering receptor expressed on myeloid cells 2 [Source:MGI Symbol;Acc:MGI:1913150]	GO:0045960	positive regulation of complement activation, classical pathway
Trem2	triggering receptor expressed on myeloid cells 2 [Source:MGI Symbol;Acc:MGI:1913150]	GO:0050850	positive regulation of calcium-mediated signaling
Trem2	triggering receptor expressed on myeloid cells 2 [Source:MGI Symbol;Acc:MGI:1913150]	GO:0050866	negative regulation of cell activation
Trem2	triggering receptor expressed on myeloid cells 2 [Source:MGI Symbol;Acc:MGI:1913150]	GO:0050921	positive regulation of chemotaxis
Trem2	triggering receptor expressed on myeloid cells 2 [Source:MGI Symbol;Acc:MGI:1913150]	GO:0051897	positive regulation of phosphatidylinositol 3-kinase/protein kinase B signal transduction
Trem2	triggering receptor expressed on myeloid cells 2 [Source:MGI Symbol;Acc:MGI:1913150]	GO:0055088	lipid homeostasis
Trem2	triggering receptor expressed on myeloid cells 2 [Source:MGI Symbol;Acc:MGI:1913150]	GO:0060075	regulation of resting membrane potential
Trem2	triggering receptor expressed on myeloid cells 2 [Source:MGI Symbol;Acc:MGI:1913150]	GO:0070345	negative regulation of fat cell proliferation
Trem2	triggering receptor expressed on myeloid cells 2 [Source:MGI Symbol;Acc:MGI:1913150]	GO:0070392	detection of lipoteichoic acid
Trem2	triggering receptor expressed on myeloid cells 2 [Source:MGI Symbol;Acc:MGI:1913150]	GO:0071223	cellular response to lipoteichoic acid
Trem2	triggering receptor expressed on myeloid cells 2 [Source:MGI Symbol;Acc:MGI:1913150]	GO:0071224	cellular response to peptidoglycan
Trem2	triggering receptor expressed on myeloid cells 2 [Source:MGI Symbol;Acc:MGI:1913150]	GO:0071640	regulation of macrophage inflammatory protein 1 alpha production
Trem2	triggering receptor expressed on myeloid cells 2 [Source:MGI Symbol;Acc:MGI:1913150]	GO:0097062	dendritic spine maintenance
Trem2	triggering receptor expressed on myeloid cells 2 [Source:MGI Symbol;Acc:MGI:1913150]	GO:0097242	amyloid-beta clearance
Trem2	triggering receptor expressed on myeloid cells 2 [Source:MGI Symbol;Acc:MGI:1913150]	GO:0098657	import into cell
Trem2	triggering receptor expressed on myeloid cells 2 [Source:MGI Symbol;Acc:MGI:1913150]	GO:0110089	regulation of hippocampal neuron apoptotic process
Trem2	triggering receptor expressed on myeloid cells 2 [Source:MGI Symbol;Acc:MGI:1913150]	GO:0150062	complement-mediated synapse pruning
Trem2	triggering receptor expressed on myeloid cells 2 [Source:MGI Symbol;Acc:MGI:1913150]	GO:0150078	positive regulation of neuroinflammatory response
Trem2	triggering receptor expressed on myeloid cells 2 [Source:MGI Symbol;Acc:MGI:1913150]	GO:1900015	regulation of cytokine production involved in inflammatory response
Trem2	triggering receptor expressed on myeloid cells 2 [Source:MGI Symbol;Acc:MGI:1913150]	GO:1901980	positive regulation of inward rectifier potassium channel activity
Trem2	triggering receptor expressed on myeloid cells 2 [Source:MGI Symbol;Acc:MGI:1913150]	GO:1902227	negative regulation of macrophage colony-stimulating factor signaling pathway
Trem2	triggering receptor expressed on myeloid cells 2 [Source:MGI Symbol;Acc:MGI:1913150]	GO:1902531	regulation of intracellular signal transduction
Trem2	triggering receptor expressed on myeloid cells 2 [Source:MGI Symbol;Acc:MGI:1913150]	GO:1903376	regulation of oxidative stress-induced neuron intrinsic apoptotic signaling pathway
Trem2	triggering receptor expressed on myeloid cells 2 [Source:MGI Symbol;Acc:MGI:1913150]	GO:1903753	negative regulation of p38MAPK cascade
Trem2	triggering receptor expressed on myeloid cells 2 [Source:MGI Symbol;Acc:MGI:1913150]	GO:1904093	negative regulation of autophagic cell death
Trem2	triggering receptor expressed on myeloid cells 2 [Source:MGI Symbol;Acc:MGI:1913150]	GO:1904141	positive regulation of microglial cell migration
Trem2	triggering receptor expressed on myeloid cells 2 [Source:MGI Symbol;Acc:MGI:1913150]	GO:1904951	positive regulation of establishment of protein localization
Trem2	triggering receptor expressed on myeloid cells 2 [Source:MGI Symbol;Acc:MGI:1913150]	GO:1905291	positive regulation of CAMKK-AMPK signaling cascade
Trem2	triggering receptor expressed on myeloid cells 2 [Source:MGI Symbol;Acc:MGI:1913150]	GO:1905581	positive regulation of low-density lipoprotein particle clearance
Trem2	triggering receptor expressed on myeloid cells 2 [Source:MGI Symbol;Acc:MGI:1913150]	GO:1905805	excitatory synapse pruning
Trem2	triggering receptor expressed on myeloid cells 2 [Source:MGI Symbol;Acc:MGI:1913150]	GO:1905808	positive regulation of synapse pruning
Trem2	triggering receptor expressed on myeloid cells 2 [Source:MGI Symbol;Acc:MGI:1913150]
Trem2	triggering receptor expressed on myeloid cells 2 [Source:MGI Symbol;Acc:MGI:1913150]	GO:0001540	amyloid-beta binding
Trem2	triggering receptor expressed on myeloid cells 2 [Source:MGI Symbol;Acc:MGI:1913150]	GO:0008013	beta-catenin binding
Trem2	triggering receptor expressed on myeloid cells 2 [Source:MGI Symbol;Acc:MGI:1913150]	GO:0008035	high-density lipoprotein particle binding
Trem2	triggering receptor expressed on myeloid cells 2 [Source:MGI Symbol;Acc:MGI:1913150]	GO:0008429	phosphatidylethanolamine binding
Trem2	triggering receptor expressed on myeloid cells 2 [Source:MGI Symbol;Acc:MGI:1913150]	GO:0030169	low-density lipoprotein particle binding
Trem2	triggering receptor expressed on myeloid cells 2 [Source:MGI Symbol;Acc:MGI:1913150]	GO:0034185	apolipoprotein binding
Trem2	triggering receptor expressed on myeloid cells 2 [Source:MGI Symbol;Acc:MGI:1913150]	GO:0034186	apolipoprotein A-I binding
Trem2	triggering receptor expressed on myeloid cells 2 [Source:MGI Symbol;Acc:MGI:1913150]	GO:0034189	very-low-density lipoprotein particle binding
Trem2	triggering receptor expressed on myeloid cells 2 [Source:MGI Symbol;Acc:MGI:1913150]	GO:0044877	protein-containing complex binding
Trem2	triggering receptor expressed on myeloid cells 2 [Source:MGI Symbol;Acc:MGI:1913150]	GO:0071813	lipoprotein particle binding
Trem2	triggering receptor expressed on myeloid cells 2 [Source:MGI Symbol;Acc:MGI:1913150]	GO:0097110	scaffold protein binding
Trem2	triggering receptor expressed on myeloid cells 2 [Source:MGI Symbol;Acc:MGI:1913150]	GO:0002588	positive regulation of antigen processing and presentation of peptide antigen via MHC class II
Trem2	triggering receptor expressed on myeloid cells 2 [Source:MGI Symbol;Acc:MGI:1913150]	GO:0006910	phagocytosis, recognition
Trem2	triggering receptor expressed on myeloid cells 2 [Source:MGI Symbol;Acc:MGI:1913150]	GO:0007613	memory
Trem2	triggering receptor expressed on myeloid cells 2 [Source:MGI Symbol;Acc:MGI:1913150]	GO:0019216	regulation of lipid metabolic process
Trem2	triggering receptor expressed on myeloid cells 2 [Source:MGI Symbol;Acc:MGI:1913150]	GO:0050714	positive regulation of protein secretion
Trem2	triggering receptor expressed on myeloid cells 2 [Source:MGI Symbol;Acc:MGI:1913150]	GO:0050731	positive regulation of peptidyl-tyrosine phosphorylation
Trem2	triggering receptor expressed on myeloid cells 2 [Source:MGI Symbol;Acc:MGI:1913150]	GO:0071396	cellular response to lipid
Trem2	triggering receptor expressed on myeloid cells 2 [Source:MGI Symbol;Acc:MGI:1913150]	GO:0071402	cellular response to lipoprotein particle stimulus
Trem2	triggering receptor expressed on myeloid cells 2 [Source:MGI Symbol;Acc:MGI:1913150]	GO:0097028	dendritic cell differentiation
Trem2	triggering receptor expressed on myeloid cells 2 [Source:MGI Symbol;Acc:MGI:1913150]	GO:0140052	cellular response to oxidised low-density lipoprotein particle stimulus
Trem2	triggering receptor expressed on myeloid cells 2 [Source:MGI Symbol;Acc:MGI:1913150]	GO:1901076	positive regulation of engulfment of apoptotic cell
Trem2	triggering receptor expressed on myeloid cells 2 [Source:MGI Symbol;Acc:MGI:1913150]	GO:1903078	positive regulation of protein localization to plasma membrane
Trem2	triggering receptor expressed on myeloid cells 2 [Source:MGI Symbol;Acc:MGI:1913150]	GO:1903082	positive regulation of C-C chemokine receptor CCR7 signaling pathway
Trem2	triggering receptor expressed on myeloid cells 2 [Source:MGI Symbol;Acc:MGI:1913150]	GO:2000350	positive regulation of CD40 signaling pathway
Trem2	triggering receptor expressed on myeloid cells 2 [Source:MGI Symbol;Acc:MGI:1913150]	GO:0016020	membrane
Trem2	triggering receptor expressed on myeloid cells 2 [Source:MGI Symbol;Acc:MGI:1913150]	GO:0044853	plasma membrane raft
Nr4a2	nuclear receptor subfamily 4, group A, member 2 [Source:MGI Symbol;Acc:MGI:1352456]	GO:0003677	DNA binding
Nr4a2	nuclear receptor subfamily 4, group A, member 2 [Source:MGI Symbol;Acc:MGI:1352456]	GO:0006355	regulation of DNA-templated transcription
Nr4a2	nuclear receptor subfamily 4, group A, member 2 [Source:MGI Symbol;Acc:MGI:1352456]	GO:0005634	nucleus
Nr4a2	nuclear receptor subfamily 4, group A, member 2 [Source:MGI Symbol;Acc:MGI:1352456]	GO:0008270	zinc ion binding
Nr4a2	nuclear receptor subfamily 4, group A, member 2 [Source:MGI Symbol;Acc:MGI:1352456]	GO:0003700	DNA-binding transcription factor activity
Nr4a2	nuclear receptor subfamily 4, group A, member 2 [Source:MGI Symbol;Acc:MGI:1352456]	GO:0043565	sequence-specific DNA binding
Nr4a2	nuclear receptor subfamily 4, group A, member 2 [Source:MGI Symbol;Acc:MGI:1352456]	GO:0004879	nuclear receptor activity
Nr4a2	nuclear receptor subfamily 4, group A, member 2 [Source:MGI Symbol;Acc:MGI:1352456]	GO:0010467	gene expression
Nr4a2	nuclear receptor subfamily 4, group A, member 2 [Source:MGI Symbol;Acc:MGI:1352456]	GO:0045944	positive regulation of transcription by RNA polymerase II
Nr4a2	nuclear receptor subfamily 4, group A, member 2 [Source:MGI Symbol;Acc:MGI:1352456]	GO:0005515	protein binding
Nr4a2	nuclear receptor subfamily 4, group A, member 2 [Source:MGI Symbol;Acc:MGI:1352456]	GO:0009791	post-embryonic development
Nr4a2	nuclear receptor subfamily 4, group A, member 2 [Source:MGI Symbol;Acc:MGI:1352456]	GO:0010468	regulation of gene expression
Nr4a2	nuclear receptor subfamily 4, group A, member 2 [Source:MGI Symbol;Acc:MGI:1352456]	GO:0043524	negative regulation of neuron apoptotic process
Nr4a2	nuclear receptor subfamily 4, group A, member 2 [Source:MGI Symbol;Acc:MGI:1352456]	GO:0008344	adult locomotory behavior
Nr4a2	nuclear receptor subfamily 4, group A, member 2 [Source:MGI Symbol;Acc:MGI:1352456]	GO:0051402	neuron apoptotic process
Nr4a2	nuclear receptor subfamily 4, group A, member 2 [Source:MGI Symbol;Acc:MGI:1352456]	GO:0000978	RNA polymerase II cis-regulatory region sequence-specific DNA binding
Nr4a2	nuclear receptor subfamily 4, group A, member 2 [Source:MGI Symbol;Acc:MGI:1352456]	GO:0030182	neuron differentiation
Nr4a2	nuclear receptor subfamily 4, group A, member 2 [Source:MGI Symbol;Acc:MGI:1352456]	GO:0006366	transcription by RNA polymerase II
Nr4a2	nuclear receptor subfamily 4, group A, member 2 [Source:MGI Symbol;Acc:MGI:1352456]	GO:0000785	chromatin
Nr4a2	nuclear receptor subfamily 4, group A, member 2 [Source:MGI Symbol;Acc:MGI:1352456]	GO:0005737	cytoplasm
Nr4a2	nuclear receptor subfamily 4, group A, member 2 [Source:MGI Symbol;Acc:MGI:1352456]	GO:0046872	metal ion binding
Nr4a2	nuclear receptor subfamily 4, group A, member 2 [Source:MGI Symbol;Acc:MGI:1352456]	GO:0000981	DNA-binding transcription factor activity, RNA polymerase II-specific
Nr4a2	nuclear receptor subfamily 4, group A, member 2 [Source:MGI Symbol;Acc:MGI:1352456]	GO:0006357	regulation of transcription by RNA polymerase II
Nr4a2	nuclear receptor subfamily 4, group A, member 2 [Source:MGI Symbol;Acc:MGI:1352456]	GO:0030522	intracellular receptor signaling pathway
Nr4a2	nuclear receptor subfamily 4, group A, member 2 [Source:MGI Symbol;Acc:MGI:1352456]	GO:0001228	DNA-binding transcription activator activity, RNA polymerase II-specific
Nr4a2	nuclear receptor subfamily 4, group A, member 2 [Source:MGI Symbol;Acc:MGI:1352456]	GO:0046982	protein heterodimerization activity
Nr4a2	nuclear receptor subfamily 4, group A, member 2 [Source:MGI Symbol;Acc:MGI:1352456]	GO:0005667	transcription regulator complex
Nr4a2	nuclear receptor subfamily 4, group A, member 2 [Source:MGI Symbol;Acc:MGI:1352456]	GO:0006351	DNA-templated transcription
Nr4a2	nuclear receptor subfamily 4, group A, member 2 [Source:MGI Symbol;Acc:MGI:1352456]	GO:0001666	response to hypoxia
Nr4a2	nuclear receptor subfamily 4, group A, member 2 [Source:MGI Symbol;Acc:MGI:1352456]	GO:0045893	positive regulation of DNA-templated transcription
Nr4a2	nuclear receptor subfamily 4, group A, member 2 [Source:MGI Symbol;Acc:MGI:1352456]	GO:0042416	dopamine biosynthetic process
Nr4a2	nuclear receptor subfamily 4, group A, member 2 [Source:MGI Symbol;Acc:MGI:1352456]	GO:0042417	dopamine metabolic process
Nr4a2	nuclear receptor subfamily 4, group A, member 2 [Source:MGI Symbol;Acc:MGI:1352456]	GO:0007399	nervous system development
Nr4a2	nuclear receptor subfamily 4, group A, member 2 [Source:MGI Symbol;Acc:MGI:1352456]	GO:0005654	nucleoplasm
Nr4a2	nuclear receptor subfamily 4, group A, member 2 [Source:MGI Symbol;Acc:MGI:1352456]	GO:0071542	dopaminergic neuron differentiation
Nr4a2	nuclear receptor subfamily 4, group A, member 2 [Source:MGI Symbol;Acc:MGI:1352456]	GO:0001764	neuron migration
Nr4a2	nuclear receptor subfamily 4, group A, member 2 [Source:MGI Symbol;Acc:MGI:1352456]	GO:0000977	RNA polymerase II transcription regulatory region sequence-specific DNA binding
Nr4a2	nuclear receptor subfamily 4, group A, member 2 [Source:MGI Symbol;Acc:MGI:1352456]	GO:0045444	fat cell differentiation
Nr4a2	nuclear receptor subfamily 4, group A, member 2 [Source:MGI Symbol;Acc:MGI:1352456]	GO:0021952	central nervous system projection neuron axonogenesis
Nr4a2	nuclear receptor subfamily 4, group A, member 2 [Source:MGI Symbol;Acc:MGI:1352456]	GO:0034599	cellular response to oxidative stress
Nr4a2	nuclear receptor subfamily 4, group A, member 2 [Source:MGI Symbol;Acc:MGI:1352456]	GO:0007611	learning or memory
Nr4a2	nuclear receptor subfamily 4, group A, member 2 [Source:MGI Symbol;Acc:MGI:1352456]	GO:0042551	neuron maturation
Nr4a2	nuclear receptor subfamily 4, group A, member 2 [Source:MGI Symbol;Acc:MGI:1352456]	GO:0043576	regulation of respiratory gaseous exchange
Nr4a2	nuclear receptor subfamily 4, group A, member 2 [Source:MGI Symbol;Acc:MGI:1352456]	GO:0021953	central nervous system neuron differentiation
Nr4a2	nuclear receptor subfamily 4, group A, member 2 [Source:MGI Symbol;Acc:MGI:1352456]	GO:0001975	response to amphetamine
Nr4a2	nuclear receptor subfamily 4, group A, member 2 [Source:MGI Symbol;Acc:MGI:1352456]	GO:0035259	nuclear glucocorticoid receptor binding
Nr4a2	nuclear receptor subfamily 4, group A, member 2 [Source:MGI Symbol;Acc:MGI:1352456]	GO:0071376	cellular response to corticotropin-releasing hormone stimulus
Nr4a2	nuclear receptor subfamily 4, group A, member 2 [Source:MGI Symbol;Acc:MGI:1352456]	GO:0021986	habenula development
Nr4a2	nuclear receptor subfamily 4, group A, member 2 [Source:MGI Symbol;Acc:MGI:1352456]	GO:0042053	regulation of dopamine metabolic process
Nr4a2	nuclear receptor subfamily 4, group A, member 2 [Source:MGI Symbol;Acc:MGI:1352456]	GO:0017085	response to insecticide
Nr4a2	nuclear receptor subfamily 4, group A, member 2 [Source:MGI Symbol;Acc:MGI:1352456]	GO:0051866	general adaptation syndrome
Nr4a2	nuclear receptor subfamily 4, group A, member 2 [Source:MGI Symbol;Acc:MGI:1352456]	GO:1990837	sequence-specific double-stranded DNA binding
Nr4a2	nuclear receptor subfamily 4, group A, member 2 [Source:MGI Symbol;Acc:MGI:1352456]	GO:0000122	negative regulation of transcription by RNA polymerase II
Nr4a2	nuclear receptor subfamily 4, group A, member 2 [Source:MGI Symbol;Acc:MGI:1352456]	GO:2001234	negative regulation of apoptotic signaling pathway
Nr4a2	nuclear receptor subfamily 4, group A, member 2 [Source:MGI Symbol;Acc:MGI:1352456]	GO:0016607	nuclear speck
Nr4a2	nuclear receptor subfamily 4, group A, member 2 [Source:MGI Symbol;Acc:MGI:1352456]
Bche	butyrylcholinesterase [Source:MGI Symbol;Acc:MGI:894278]	GO:0004104	cholinesterase activity
Bche	butyrylcholinesterase [Source:MGI Symbol;Acc:MGI:894278]	GO:0008285	negative regulation of cell population proliferation
Bche	butyrylcholinesterase [Source:MGI Symbol;Acc:MGI:894278]	GO:0005886	plasma membrane
Bche	butyrylcholinesterase [Source:MGI Symbol;Acc:MGI:894278]	GO:0005615	extracellular space
Bche	butyrylcholinesterase [Source:MGI Symbol;Acc:MGI:894278]	GO:0005576	extracellular region
Bche	butyrylcholinesterase [Source:MGI Symbol;Acc:MGI:894278]	GO:0005783	endoplasmic reticulum
Bche	butyrylcholinesterase [Source:MGI Symbol;Acc:MGI:894278]	GO:0052689	carboxylic ester hydrolase activity
Bche	butyrylcholinesterase [Source:MGI Symbol;Acc:MGI:894278]	GO:0009410	response to xenobiotic stimulus
Bche	butyrylcholinesterase [Source:MGI Symbol;Acc:MGI:894278]	GO:0007584	response to nutrient
Bche	butyrylcholinesterase [Source:MGI Symbol;Acc:MGI:894278]	GO:0051384	response to glucocorticoid
Bche	butyrylcholinesterase [Source:MGI Symbol;Acc:MGI:894278]	GO:0050805	negative regulation of synaptic transmission
Bche	butyrylcholinesterase [Source:MGI Symbol;Acc:MGI:894278]	GO:0005788	endoplasmic reticulum lumen
Bche	butyrylcholinesterase [Source:MGI Symbol;Acc:MGI:894278]	GO:0033265	choline binding
Bche	butyrylcholinesterase [Source:MGI Symbol;Acc:MGI:894278]	GO:0019695	choline metabolic process
Bche	butyrylcholinesterase [Source:MGI Symbol;Acc:MGI:894278]	GO:0007612	learning
Bche	butyrylcholinesterase [Source:MGI Symbol;Acc:MGI:894278]	GO:0043279	response to alkaloid
Bche	butyrylcholinesterase [Source:MGI Symbol;Acc:MGI:894278]	GO:0003990	acetylcholinesterase activity
Bche	butyrylcholinesterase [Source:MGI Symbol;Acc:MGI:894278]	GO:0006581	acetylcholine catabolic process
Bche	butyrylcholinesterase [Source:MGI Symbol;Acc:MGI:894278]	GO:0014016	neuroblast differentiation
Bche	butyrylcholinesterase [Source:MGI Symbol;Acc:MGI:894278]	GO:0042802	identical protein binding
Bche	butyrylcholinesterase [Source:MGI Symbol;Acc:MGI:894278]	GO:0051593	response to folic acid
Bche	butyrylcholinesterase [Source:MGI Symbol;Acc:MGI:894278]	GO:0005641	nuclear envelope lumen
Bche	butyrylcholinesterase [Source:MGI Symbol;Acc:MGI:894278]
Bche	butyrylcholinesterase [Source:MGI Symbol;Acc:MGI:894278]	GO:0016020	membrane
Fgf17	fibroblast growth factor 17 [Source:MGI Symbol;Acc:MGI:1202401]	GO:0008083	growth factor activity
Fgf17	fibroblast growth factor 17 [Source:MGI Symbol;Acc:MGI:1202401]	GO:0008284	positive regulation of cell population proliferation
Fgf17	fibroblast growth factor 17 [Source:MGI Symbol;Acc:MGI:1202401]	GO:0005615	extracellular space
Fgf17	fibroblast growth factor 17 [Source:MGI Symbol;Acc:MGI:1202401]	GO:0005576	extracellular region
Fgf17	fibroblast growth factor 17 [Source:MGI Symbol;Acc:MGI:1202401]	GO:0007165	signal transduction
Fgf17	fibroblast growth factor 17 [Source:MGI Symbol;Acc:MGI:1202401]	GO:0005737	cytoplasm
Fgf17	fibroblast growth factor 17 [Source:MGI Symbol;Acc:MGI:1202401]	GO:0030154	cell differentiation
Fgf17	fibroblast growth factor 17 [Source:MGI Symbol;Acc:MGI:1202401]	GO:0030334	regulation of cell migration
Fgf17	fibroblast growth factor 17 [Source:MGI Symbol;Acc:MGI:1202401]	GO:0008543	fibroblast growth factor receptor signaling pathway
Fgf17	fibroblast growth factor 17 [Source:MGI Symbol;Acc:MGI:1202401]	GO:0010628	positive regulation of gene expression
Fgf17	fibroblast growth factor 17 [Source:MGI Symbol;Acc:MGI:1202401]	GO:0009887	animal organ morphogenesis
Fgf17	fibroblast growth factor 17 [Source:MGI Symbol;Acc:MGI:1202401]	GO:0005111	type 2 fibroblast growth factor receptor binding
Fgf17	fibroblast growth factor 17 [Source:MGI Symbol;Acc:MGI:1202401]	GO:0043410	positive regulation of MAPK cascade
Fgf17	fibroblast growth factor 17 [Source:MGI Symbol;Acc:MGI:1202401]	GO:0005105	type 1 fibroblast growth factor receptor binding
Rasal3	RAS protein activator like 3 [Source:MGI Symbol;Acc:MGI:2444128]	GO:0043087	regulation of GTPase activity
Rasal3	RAS protein activator like 3 [Source:MGI Symbol;Acc:MGI:2444128]	GO:0005737	cytoplasm
Rasal3	RAS protein activator like 3 [Source:MGI Symbol;Acc:MGI:2444128]	GO:0005515	protein binding
Rasal3	RAS protein activator like 3 [Source:MGI Symbol;Acc:MGI:2444128]	GO:0005096	GTPase activator activity
Rasal3	RAS protein activator like 3 [Source:MGI Symbol;Acc:MGI:2444128]	GO:0005938	cell cortex
Rasal3	RAS protein activator like 3 [Source:MGI Symbol;Acc:MGI:2444128]	GO:0046580	negative regulation of Ras protein signal transduction
Rasal3	RAS protein activator like 3 [Source:MGI Symbol;Acc:MGI:2444128]	GO:0051142	positive regulation of NK T cell proliferation
Rasal3	RAS protein activator like 3 [Source:MGI Symbol;Acc:MGI:2444128]
Rasal3	RAS protein activator like 3 [Source:MGI Symbol;Acc:MGI:2444128]	GO:0042802	identical protein binding
Rasal3	RAS protein activator like 3 [Source:MGI Symbol;Acc:MGI:2444128]	GO:0098562	cytoplasmic side of membrane
S100b	S100 protein, beta polypeptide, neural [Source:MGI Symbol;Acc:MGI:98217]	GO:0008270	zinc ion binding
S100b	S100 protein, beta polypeptide, neural [Source:MGI Symbol;Acc:MGI:98217]	GO:0005509	calcium ion binding
S100b	S100 protein, beta polypeptide, neural [Source:MGI Symbol;Acc:MGI:98217]	GO:0005634	nucleus
S100b	S100 protein, beta polypeptide, neural [Source:MGI Symbol;Acc:MGI:98217]	GO:0008284	positive regulation of cell population proliferation
S100b	S100 protein, beta polypeptide, neural [Source:MGI Symbol;Acc:MGI:98217]	GO:2001015	negative regulation of skeletal muscle cell differentiation
S100b	S100 protein, beta polypeptide, neural [Source:MGI Symbol;Acc:MGI:98217]	GO:0005737	cytoplasm
S100b	S100 protein, beta polypeptide, neural [Source:MGI Symbol;Acc:MGI:98217]	GO:0031643	positive regulation of myelination
S100b	S100 protein, beta polypeptide, neural [Source:MGI Symbol;Acc:MGI:98217]	GO:0046872	metal ion binding
S100b	S100 protein, beta polypeptide, neural [Source:MGI Symbol;Acc:MGI:98217]	GO:0005615	extracellular space
S100b	S100 protein, beta polypeptide, neural [Source:MGI Symbol;Acc:MGI:98217]	GO:0007155	cell adhesion
S100b	S100 protein, beta polypeptide, neural [Source:MGI Symbol;Acc:MGI:98217]	GO:0005576	extracellular region
S100b	S100 protein, beta polypeptide, neural [Source:MGI Symbol;Acc:MGI:98217]	GO:0043025	neuronal cell body
S100b	S100 protein, beta polypeptide, neural [Source:MGI Symbol;Acc:MGI:98217]	GO:0048306	calcium-dependent protein binding
S100b	S100 protein, beta polypeptide, neural [Source:MGI Symbol;Acc:MGI:98217]	GO:0007613	memory
S100b	S100 protein, beta polypeptide, neural [Source:MGI Symbol;Acc:MGI:98217]	GO:0042802	identical protein binding
S100b	S100 protein, beta polypeptide, neural [Source:MGI Symbol;Acc:MGI:98217]	GO:0043065	positive regulation of apoptotic process
S100b	S100 protein, beta polypeptide, neural [Source:MGI Symbol;Acc:MGI:98217]	GO:0001817	regulation of cytokine production
S100b	S100 protein, beta polypeptide, neural [Source:MGI Symbol;Acc:MGI:98217]	GO:0042803	protein homodimerization activity
S100b	S100 protein, beta polypeptide, neural [Source:MGI Symbol;Acc:MGI:98217]	GO:0006874	intracellular calcium ion homeostasis
S100b	S100 protein, beta polypeptide, neural [Source:MGI Symbol;Acc:MGI:98217]	GO:0043123	positive regulation of canonical NF-kappaB signal transduction
S100b	S100 protein, beta polypeptide, neural [Source:MGI Symbol;Acc:MGI:98217]	GO:0007611	learning or memory
S100b	S100 protein, beta polypeptide, neural [Source:MGI Symbol;Acc:MGI:98217]	GO:0008360	regulation of cell shape
S100b	S100 protein, beta polypeptide, neural [Source:MGI Symbol;Acc:MGI:98217]	GO:0006112	energy reserve metabolic process
S100b	S100 protein, beta polypeptide, neural [Source:MGI Symbol;Acc:MGI:98217]	GO:0005102	signaling receptor binding
S100b	S100 protein, beta polypeptide, neural [Source:MGI Symbol;Acc:MGI:98217]	GO:0050786	RAGE receptor binding
S100b	S100 protein, beta polypeptide, neural [Source:MGI Symbol;Acc:MGI:98217]	GO:0050806	positive regulation of synaptic transmission
S100b	S100 protein, beta polypeptide, neural [Source:MGI Symbol;Acc:MGI:98217]	GO:0048168	regulation of neuronal synaptic plasticity
S100b	S100 protein, beta polypeptide, neural [Source:MGI Symbol;Acc:MGI:98217]	GO:0045666	positive regulation of neuron differentiation
S100b	S100 protein, beta polypeptide, neural [Source:MGI Symbol;Acc:MGI:98217]	GO:1990138	neuron projection extension
S100b	S100 protein, beta polypeptide, neural [Source:MGI Symbol;Acc:MGI:98217]	GO:0048169	regulation of long-term neuronal synaptic plasticity
S100b	S100 protein, beta polypeptide, neural [Source:MGI Symbol;Acc:MGI:98217]	GO:1990845	adaptive thermogenesis
S100b	S100 protein, beta polypeptide, neural [Source:MGI Symbol;Acc:MGI:98217]	GO:0044548	S100 protein binding
S100b	S100 protein, beta polypeptide, neural [Source:MGI Symbol;Acc:MGI:98217]	GO:0048156	tau protein binding
S100b	S100 protein, beta polypeptide, neural [Source:MGI Symbol;Acc:MGI:98217]	GO:0097490	sympathetic neuron projection extension
S100b	S100 protein, beta polypeptide, neural [Source:MGI Symbol;Acc:MGI:98217]	GO:0001726	ruffle
S100b	S100 protein, beta polypeptide, neural [Source:MGI Symbol;Acc:MGI:98217]	GO:0005654	nucleoplasm
S100b	S100 protein, beta polypeptide, neural [Source:MGI Symbol;Acc:MGI:98217]	GO:0005829	cytosol
S100b	S100 protein, beta polypeptide, neural [Source:MGI Symbol;Acc:MGI:98217]	GO:0043231	intracellular membrane-bounded organelle
S100b	S100 protein, beta polypeptide, neural [Source:MGI Symbol;Acc:MGI:98217]	GO:0048471	perinuclear region of cytoplasm
Cx3cr1	C-X3-C motif chemokine receptor 1 [Source:MGI Symbol;Acc:MGI:1333815]	GO:0004930	G protein-coupled receptor activity
Cx3cr1	C-X3-C motif chemokine receptor 1 [Source:MGI Symbol;Acc:MGI:1333815]	GO:0007186	G protein-coupled receptor signaling pathway
Cx3cr1	C-X3-C motif chemokine receptor 1 [Source:MGI Symbol;Acc:MGI:1333815]	GO:0016020	membrane
Cx3cr1	C-X3-C motif chemokine receptor 1 [Source:MGI Symbol;Acc:MGI:1333815]	GO:0007155	cell adhesion
Cx3cr1	C-X3-C motif chemokine receptor 1 [Source:MGI Symbol;Acc:MGI:1333815]	GO:0006935	chemotaxis
Cx3cr1	C-X3-C motif chemokine receptor 1 [Source:MGI Symbol;Acc:MGI:1333815]	GO:0016495	C-X3-C chemokine receptor activity
Cx3cr1	C-X3-C motif chemokine receptor 1 [Source:MGI Symbol;Acc:MGI:1333815]	GO:0045766	positive regulation of angiogenesis
Cx3cr1	C-X3-C motif chemokine receptor 1 [Source:MGI Symbol;Acc:MGI:1333815]	GO:0071356	cellular response to tumor necrosis factor
Cx3cr1	C-X3-C motif chemokine receptor 1 [Source:MGI Symbol;Acc:MGI:1333815]	GO:0002931	response to ischemia
Cx3cr1	C-X3-C motif chemokine receptor 1 [Source:MGI Symbol;Acc:MGI:1333815]	GO:0051897	positive regulation of phosphatidylinositol 3-kinase/protein kinase B signal transduction
Cx3cr1	C-X3-C motif chemokine receptor 1 [Source:MGI Symbol;Acc:MGI:1333815]	GO:0001774	microglial cell activation
Cx3cr1	C-X3-C motif chemokine receptor 1 [Source:MGI Symbol;Acc:MGI:1333815]	GO:0006955	immune response
Cx3cr1	C-X3-C motif chemokine receptor 1 [Source:MGI Symbol;Acc:MGI:1333815]	GO:0002250	adaptive immune response
Cx3cr1	C-X3-C motif chemokine receptor 1 [Source:MGI Symbol;Acc:MGI:1333815]	GO:0009897	external side of plasma membrane
Cx3cr1	C-X3-C motif chemokine receptor 1 [Source:MGI Symbol;Acc:MGI:1333815]	GO:0005886	plasma membrane
Cx3cr1	C-X3-C motif chemokine receptor 1 [Source:MGI Symbol;Acc:MGI:1333815]	GO:0098609	cell-cell adhesion
Cx3cr1	C-X3-C motif chemokine receptor 1 [Source:MGI Symbol;Acc:MGI:1333815]	GO:0006954	inflammatory response
Cx3cr1	C-X3-C motif chemokine receptor 1 [Source:MGI Symbol;Acc:MGI:1333815]	GO:0045087	innate immune response
Cx3cr1	C-X3-C motif chemokine receptor 1 [Source:MGI Symbol;Acc:MGI:1333815]	GO:0009986	cell surface
Cx3cr1	C-X3-C motif chemokine receptor 1 [Source:MGI Symbol;Acc:MGI:1333815]	GO:0048471	perinuclear region of cytoplasm
Cx3cr1	C-X3-C motif chemokine receptor 1 [Source:MGI Symbol;Acc:MGI:1333815]	GO:0007613	memory
Cx3cr1	C-X3-C motif chemokine receptor 1 [Source:MGI Symbol;Acc:MGI:1333815]	GO:0007204	positive regulation of cytosolic calcium ion concentration
Cx3cr1	C-X3-C motif chemokine receptor 1 [Source:MGI Symbol;Acc:MGI:1333815]	GO:0007420	brain development
Cx3cr1	C-X3-C motif chemokine receptor 1 [Source:MGI Symbol;Acc:MGI:1333815]	GO:0002052	positive regulation of neuroblast proliferation
Cx3cr1	C-X3-C motif chemokine receptor 1 [Source:MGI Symbol;Acc:MGI:1333815]	GO:0048874	host-mediated regulation of intestinal microbiota composition
Cx3cr1	C-X3-C motif chemokine receptor 1 [Source:MGI Symbol;Acc:MGI:1333815]	GO:0061760	antifungal innate immune response
Cx3cr1	C-X3-C motif chemokine receptor 1 [Source:MGI Symbol;Acc:MGI:1333815]	GO:0032809	neuronal cell body membrane
Cx3cr1	C-X3-C motif chemokine receptor 1 [Source:MGI Symbol;Acc:MGI:1333815]	GO:0030336	negative regulation of cell migration
Cx3cr1	C-X3-C motif chemokine receptor 1 [Source:MGI Symbol;Acc:MGI:1333815]	GO:0043123	positive regulation of canonical NF-kappaB signal transduction
Cx3cr1	C-X3-C motif chemokine receptor 1 [Source:MGI Symbol;Acc:MGI:1333815]	GO:0019722	calcium-mediated signaling
Cx3cr1	C-X3-C motif chemokine receptor 1 [Source:MGI Symbol;Acc:MGI:1333815]	GO:1900272	negative regulation of long-term synaptic potentiation
Cx3cr1	C-X3-C motif chemokine receptor 1 [Source:MGI Symbol;Acc:MGI:1333815]	GO:0016493	C-C chemokine receptor activity
Cx3cr1	C-X3-C motif chemokine receptor 1 [Source:MGI Symbol;Acc:MGI:1333815]	GO:0019957	C-C chemokine binding
Cx3cr1	C-X3-C motif chemokine receptor 1 [Source:MGI Symbol;Acc:MGI:1333815]	GO:0060326	cell chemotaxis
Cx3cr1	C-X3-C motif chemokine receptor 1 [Source:MGI Symbol;Acc:MGI:1333815]	GO:2001234	negative regulation of apoptotic signaling pathway
Cx3cr1	C-X3-C motif chemokine receptor 1 [Source:MGI Symbol;Acc:MGI:1333815]	GO:0035425	autocrine signaling
Cx3cr1	C-X3-C motif chemokine receptor 1 [Source:MGI Symbol;Acc:MGI:1333815]	GO:0070098	chemokine-mediated signaling pathway
Cx3cr1	C-X3-C motif chemokine receptor 1 [Source:MGI Symbol;Acc:MGI:1333815]	GO:0002282	microglial cell activation involved in immune response
Cx3cr1	C-X3-C motif chemokine receptor 1 [Source:MGI Symbol;Acc:MGI:1333815]	GO:0071222	cellular response to lipopolysaccharide
Cx3cr1	C-X3-C motif chemokine receptor 1 [Source:MGI Symbol;Acc:MGI:1333815]	GO:0090026	positive regulation of monocyte chemotaxis
Cx3cr1	C-X3-C motif chemokine receptor 1 [Source:MGI Symbol;Acc:MGI:1333815]	GO:0110091	negative regulation of hippocampal neuron apoptotic process
Cx3cr1	C-X3-C motif chemokine receptor 1 [Source:MGI Symbol;Acc:MGI:1333815]	GO:0030595	leukocyte chemotaxis
Cx3cr1	C-X3-C motif chemokine receptor 1 [Source:MGI Symbol;Acc:MGI:1333815]	GO:0004950	chemokine receptor activity
Cx3cr1	C-X3-C motif chemokine receptor 1 [Source:MGI Symbol;Acc:MGI:1333815]	GO:0032691	negative regulation of interleukin-1 beta production
Cx3cr1	C-X3-C motif chemokine receptor 1 [Source:MGI Symbol;Acc:MGI:1333815]	GO:0050804	modulation of chemical synaptic transmission
Cx3cr1	C-X3-C motif chemokine receptor 1 [Source:MGI Symbol;Acc:MGI:1333815]	GO:0045428	regulation of nitric oxide biosynthetic process
Cx3cr1	C-X3-C motif chemokine receptor 1 [Source:MGI Symbol;Acc:MGI:1333815]	GO:0004896	cytokine receptor activity
Cx3cr1	C-X3-C motif chemokine receptor 1 [Source:MGI Symbol;Acc:MGI:1333815]	GO:0035176	social behavior
Cx3cr1	C-X3-C motif chemokine receptor 1 [Source:MGI Symbol;Acc:MGI:1333815]	GO:1904141	positive regulation of microglial cell migration
Cx3cr1	C-X3-C motif chemokine receptor 1 [Source:MGI Symbol;Acc:MGI:1333815]	GO:0050901	leukocyte tethering or rolling
Cx3cr1	C-X3-C motif chemokine receptor 1 [Source:MGI Symbol;Acc:MGI:1333815]	GO:0019960	C-X3-C chemokine binding
Cx3cr1	C-X3-C motif chemokine receptor 1 [Source:MGI Symbol;Acc:MGI:1333815]	GO:0002881	negative regulation of chronic inflammatory response to non-antigenic stimulus
Cx3cr1	C-X3-C motif chemokine receptor 1 [Source:MGI Symbol;Acc:MGI:1333815]	GO:0007200	phospholipase C-activating G protein-coupled receptor signaling pathway
Cx3cr1	C-X3-C motif chemokine receptor 1 [Source:MGI Symbol;Acc:MGI:1333815]	GO:0021626	central nervous system maturation
Cx3cr1	C-X3-C motif chemokine receptor 1 [Source:MGI Symbol;Acc:MGI:1333815]	GO:0032680	regulation of tumor necrosis factor production
Cx3cr1	C-X3-C motif chemokine receptor 1 [Source:MGI Symbol;Acc:MGI:1333815]	GO:0050769	positive regulation of neurogenesis
Cx3cr1	C-X3-C motif chemokine receptor 1 [Source:MGI Symbol;Acc:MGI:1333815]	GO:0060074	synapse maturation
Cx3cr1	C-X3-C motif chemokine receptor 1 [Source:MGI Symbol;Acc:MGI:1333815]	GO:0098883	synapse pruning
Cx3cr1	C-X3-C motif chemokine receptor 1 [Source:MGI Symbol;Acc:MGI:1333815]	GO:0150090	multiple spine synapse organization, single dendrite
Cx3cr1	C-X3-C motif chemokine receptor 1 [Source:MGI Symbol;Acc:MGI:1333815]	GO:1903721	positive regulation of I-kappaB phosphorylation
Cx3cr1	C-X3-C motif chemokine receptor 1 [Source:MGI Symbol;Acc:MGI:1333815]	GO:1904150	negative regulation of microglial cell mediated cytotoxicity
Cx3cr1	C-X3-C motif chemokine receptor 1 [Source:MGI Symbol;Acc:MGI:1333815]	GO:0097447	dendritic tree
Cx3cr1	C-X3-C motif chemokine receptor 1 [Source:MGI Symbol;Acc:MGI:1333815]	GO:0031737	CX3C chemokine receptor binding
Cx3cr1	C-X3-C motif chemokine receptor 1 [Source:MGI Symbol;Acc:MGI:1333815]	GO:0071560	cellular response to transforming growth factor beta stimulus
Sec16b	SEC16 homolog B, endoplasmic reticulum export factor [Source:MGI Symbol;Acc:MGI:2148802]	GO:0006914	autophagy
Sec16b	SEC16 homolog B, endoplasmic reticulum export factor [Source:MGI Symbol;Acc:MGI:2148802]	GO:0048208	COPII vesicle coating
Sec16b	SEC16 homolog B, endoplasmic reticulum export factor [Source:MGI Symbol;Acc:MGI:2148802]	GO:0003674	molecular_function
Sec16b	SEC16 homolog B, endoplasmic reticulum export factor [Source:MGI Symbol;Acc:MGI:2148802]	GO:0016020	membrane
Sec16b	SEC16 homolog B, endoplasmic reticulum export factor [Source:MGI Symbol;Acc:MGI:2148802]	GO:0000139	Golgi membrane
Sec16b	SEC16 homolog B, endoplasmic reticulum export factor [Source:MGI Symbol;Acc:MGI:2148802]	GO:0005794	Golgi apparatus
Sec16b	SEC16 homolog B, endoplasmic reticulum export factor [Source:MGI Symbol;Acc:MGI:2148802]	GO:0005783	endoplasmic reticulum
Sec16b	SEC16 homolog B, endoplasmic reticulum export factor [Source:MGI Symbol;Acc:MGI:2148802]	GO:0005789	endoplasmic reticulum membrane
Sec16b	SEC16 homolog B, endoplasmic reticulum export factor [Source:MGI Symbol;Acc:MGI:2148802]	GO:0015031	protein transport
Sec16b	SEC16 homolog B, endoplasmic reticulum export factor [Source:MGI Symbol;Acc:MGI:2148802]	GO:0016192	vesicle-mediated transport
Sec16b	SEC16 homolog B, endoplasmic reticulum export factor [Source:MGI Symbol;Acc:MGI:2148802]	GO:0070971	endoplasmic reticulum exit site
Sec16b	SEC16 homolog B, endoplasmic reticulum export factor [Source:MGI Symbol;Acc:MGI:2148802]	GO:0006888	endoplasmic reticulum to Golgi vesicle-mediated transport
Sec16b	SEC16 homolog B, endoplasmic reticulum export factor [Source:MGI Symbol;Acc:MGI:2148802]	GO:0046907	intracellular transport
Sec16b	SEC16 homolog B, endoplasmic reticulum export factor [Source:MGI Symbol;Acc:MGI:2148802]	GO:0007030	Golgi organization
Sec16b	SEC16 homolog B, endoplasmic reticulum export factor [Source:MGI Symbol;Acc:MGI:2148802]	GO:0007031	peroxisome organization
Sec16b	SEC16 homolog B, endoplasmic reticulum export factor [Source:MGI Symbol;Acc:MGI:2148802]	GO:0070973	protein localization to endoplasmic reticulum exit site
Sec16b	SEC16 homolog B, endoplasmic reticulum export factor [Source:MGI Symbol;Acc:MGI:2148802]	GO:0012507	ER to Golgi transport vesicle membrane
Sec16b	SEC16 homolog B, endoplasmic reticulum export factor [Source:MGI Symbol;Acc:MGI:2148802]	GO:0007029	endoplasmic reticulum organization
Sec16b	SEC16 homolog B, endoplasmic reticulum export factor [Source:MGI Symbol;Acc:MGI:2148802]	GO:0010628	positive regulation of gene expression
Sec16b	SEC16 homolog B, endoplasmic reticulum export factor [Source:MGI Symbol;Acc:MGI:2148802]	GO:0016559	peroxisome fission
Sec16b	SEC16 homolog B, endoplasmic reticulum export factor [Source:MGI Symbol;Acc:MGI:2148802]	GO:0070863	positive regulation of protein exit from endoplasmic reticulum
Sec16b	SEC16 homolog B, endoplasmic reticulum export factor [Source:MGI Symbol;Acc:MGI:2148802]	GO:0043231	intracellular membrane-bounded organelle
Sec16b	SEC16 homolog B, endoplasmic reticulum export factor [Source:MGI Symbol;Acc:MGI:2148802]
mt-Nd2	mitochondrially encoded NADH dehydrogenase 2 [Source:MGI Symbol;Acc:MGI:102500]	GO:0008137	NADH dehydrogenase (ubiquinone) activity
mt-Nd2	mitochondrially encoded NADH dehydrogenase 2 [Source:MGI Symbol;Acc:MGI:102500]	GO:0006120	mitochondrial electron transport, NADH to ubiquinone
mt-Nd2	mitochondrially encoded NADH dehydrogenase 2 [Source:MGI Symbol;Acc:MGI:102500]	GO:0005739	mitochondrion
mt-Nd2	mitochondrially encoded NADH dehydrogenase 2 [Source:MGI Symbol;Acc:MGI:102500]	GO:0072593	reactive oxygen species metabolic process
mt-Nd2	mitochondrially encoded NADH dehydrogenase 2 [Source:MGI Symbol;Acc:MGI:102500]	GO:1902600	proton transmembrane transport
mt-Nd2	mitochondrially encoded NADH dehydrogenase 2 [Source:MGI Symbol;Acc:MGI:102500]	GO:0016491	oxidoreductase activity
mt-Nd2	mitochondrially encoded NADH dehydrogenase 2 [Source:MGI Symbol;Acc:MGI:102500]	GO:0005743	mitochondrial inner membrane
mt-Nd2	mitochondrially encoded NADH dehydrogenase 2 [Source:MGI Symbol;Acc:MGI:102500]	GO:0019901	protein kinase binding
mt-Nd2	mitochondrially encoded NADH dehydrogenase 2 [Source:MGI Symbol;Acc:MGI:102500]	GO:0032981	mitochondrial respiratory chain complex I assembly
mt-Nd2	mitochondrially encoded NADH dehydrogenase 2 [Source:MGI Symbol;Acc:MGI:102500]	GO:0035255	ionotropic glutamate receptor binding
mt-Nd2	mitochondrially encoded NADH dehydrogenase 2 [Source:MGI Symbol;Acc:MGI:102500]	GO:0009060	aerobic respiration
mt-Nd2	mitochondrially encoded NADH dehydrogenase 2 [Source:MGI Symbol;Acc:MGI:102500]	GO:0042776	proton motive force-driven mitochondrial ATP synthesis
mt-Nd2	mitochondrially encoded NADH dehydrogenase 2 [Source:MGI Symbol;Acc:MGI:102500]	GO:0045271	respiratory chain complex I
Aif1	allograft inflammatory factor 1 [Source:MGI Symbol;Acc:MGI:1343098]
Aif1	allograft inflammatory factor 1 [Source:MGI Symbol;Acc:MGI:1343098]	GO:0005509	calcium ion binding
Aif1	allograft inflammatory factor 1 [Source:MGI Symbol;Acc:MGI:1343098]	GO:0043066	negative regulation of apoptotic process
Aif1	allograft inflammatory factor 1 [Source:MGI Symbol;Acc:MGI:1343098]	GO:0010629	negative regulation of gene expression
Aif1	allograft inflammatory factor 1 [Source:MGI Symbol;Acc:MGI:1343098]	GO:0005515	protein binding
Aif1	allograft inflammatory factor 1 [Source:MGI Symbol;Acc:MGI:1343098]	GO:0005737	cytoplasm
Aif1	allograft inflammatory factor 1 [Source:MGI Symbol;Acc:MGI:1343098]	GO:0005634	nucleus
Aif1	allograft inflammatory factor 1 [Source:MGI Symbol;Acc:MGI:1343098]	GO:0042995	cell projection
Aif1	allograft inflammatory factor 1 [Source:MGI Symbol;Acc:MGI:1343098]	GO:0046872	metal ion binding
Aif1	allograft inflammatory factor 1 [Source:MGI Symbol;Acc:MGI:1343098]	GO:0005886	plasma membrane
Aif1	allograft inflammatory factor 1 [Source:MGI Symbol;Acc:MGI:1343098]	GO:0005829	cytosol
Aif1	allograft inflammatory factor 1 [Source:MGI Symbol;Acc:MGI:1343098]	GO:0005856	cytoskeleton
Aif1	allograft inflammatory factor 1 [Source:MGI Symbol;Acc:MGI:1343098]	GO:0030027	lamellipodium
Aif1	allograft inflammatory factor 1 [Source:MGI Symbol;Acc:MGI:1343098]	GO:0003779	actin binding
Aif1	allograft inflammatory factor 1 [Source:MGI Symbol;Acc:MGI:1343098]	GO:0006954	inflammatory response
Aif1	allograft inflammatory factor 1 [Source:MGI Symbol;Acc:MGI:1343098]	GO:0001934	positive regulation of protein phosphorylation
Aif1	allograft inflammatory factor 1 [Source:MGI Symbol;Acc:MGI:1343098]	GO:0051015	actin filament binding
Aif1	allograft inflammatory factor 1 [Source:MGI Symbol;Acc:MGI:1343098]	GO:0032587	ruffle membrane
Aif1	allograft inflammatory factor 1 [Source:MGI Symbol;Acc:MGI:1343098]	GO:0043204	perikaryon
Aif1	allograft inflammatory factor 1 [Source:MGI Symbol;Acc:MGI:1343098]	GO:0045429	positive regulation of nitric oxide biosynthetic process
Aif1	allograft inflammatory factor 1 [Source:MGI Symbol;Acc:MGI:1343098]	GO:0001726	ruffle
Aif1	allograft inflammatory factor 1 [Source:MGI Symbol;Acc:MGI:1343098]	GO:0001891	phagocytic cup
Aif1	allograft inflammatory factor 1 [Source:MGI Symbol;Acc:MGI:1343098]	GO:0071346	cellular response to type II interferon
Aif1	allograft inflammatory factor 1 [Source:MGI Symbol;Acc:MGI:1343098]	GO:0097386	glial cell projection
Aif1	allograft inflammatory factor 1 [Source:MGI Symbol;Acc:MGI:1343098]	GO:0030335	positive regulation of cell migration
Aif1	allograft inflammatory factor 1 [Source:MGI Symbol;Acc:MGI:1343098]	GO:0051017	actin filament bundle assembly
Aif1	allograft inflammatory factor 1 [Source:MGI Symbol;Acc:MGI:1343098]	GO:0005884	actin filament
Aif1	allograft inflammatory factor 1 [Source:MGI Symbol;Acc:MGI:1343098]	GO:0048661	positive regulation of smooth muscle cell proliferation
Aif1	allograft inflammatory factor 1 [Source:MGI Symbol;Acc:MGI:1343098]	GO:2000406	positive regulation of T cell migration
Aif1	allograft inflammatory factor 1 [Source:MGI Symbol;Acc:MGI:1343098]	GO:0030041	actin filament polymerization
Aif1	allograft inflammatory factor 1 [Source:MGI Symbol;Acc:MGI:1343098]	GO:0001774	microglial cell activation
Aif1	allograft inflammatory factor 1 [Source:MGI Symbol;Acc:MGI:1343098]	GO:0006911	phagocytosis, engulfment
Aif1	allograft inflammatory factor 1 [Source:MGI Symbol;Acc:MGI:1343098]	GO:0014739	positive regulation of muscle hyperplasia
Aif1	allograft inflammatory factor 1 [Source:MGI Symbol;Acc:MGI:1343098]	GO:0016601	Rac protein signal transduction
Aif1	allograft inflammatory factor 1 [Source:MGI Symbol;Acc:MGI:1343098]	GO:0030046	parallel actin filament bundle assembly
Aif1	allograft inflammatory factor 1 [Source:MGI Symbol;Acc:MGI:1343098]	GO:0042102	positive regulation of T cell proliferation
Aif1	allograft inflammatory factor 1 [Source:MGI Symbol;Acc:MGI:1343098]	GO:0051764	actin crosslink formation
Aif1	allograft inflammatory factor 1 [Source:MGI Symbol;Acc:MGI:1343098]	GO:0071673	positive regulation of smooth muscle cell chemotaxis
Aif1	allograft inflammatory factor 1 [Source:MGI Symbol;Acc:MGI:1343098]	GO:0090026	positive regulation of monocyte chemotaxis
Aif1	allograft inflammatory factor 1 [Source:MGI Symbol;Acc:MGI:1343098]	GO:0097178	ruffle assembly
Aif1	allograft inflammatory factor 1 [Source:MGI Symbol;Acc:MGI:1343098]	GO:1900087	positive regulation of G1/S transition of mitotic cell cycle
Aif1	allograft inflammatory factor 1 [Source:MGI Symbol;Acc:MGI:1343098]	GO:0008284	positive regulation of cell population proliferation
Aif1	allograft inflammatory factor 1 [Source:MGI Symbol;Acc:MGI:1343098]	GO:0032722	positive regulation of chemokine production
Aif1	allograft inflammatory factor 1 [Source:MGI Symbol;Acc:MGI:1343098]	GO:0032755	positive regulation of interleukin-6 production
Aif1	allograft inflammatory factor 1 [Source:MGI Symbol;Acc:MGI:1343098]	GO:0034599	cellular response to oxidative stress
Aif1	allograft inflammatory factor 1 [Source:MGI Symbol;Acc:MGI:1343098]	GO:0048662	negative regulation of smooth muscle cell proliferation
Aif1	allograft inflammatory factor 1 [Source:MGI Symbol;Acc:MGI:1343098]	GO:0050921	positive regulation of chemotaxis
Aif1	allograft inflammatory factor 1 [Source:MGI Symbol;Acc:MGI:1343098]	GO:0071672	negative regulation of smooth muscle cell chemotaxis
Aif1	allograft inflammatory factor 1 [Source:MGI Symbol;Acc:MGI:1343098]	GO:0071677	positive regulation of mononuclear cell migration
Aif1	allograft inflammatory factor 1 [Source:MGI Symbol;Acc:MGI:1343098]	GO:0090271	positive regulation of fibroblast growth factor production
Aif1	allograft inflammatory factor 1 [Source:MGI Symbol;Acc:MGI:1343098]	GO:0048471	perinuclear region of cytoplasm
Tph1	tryptophan hydroxylase 1 [Source:MGI Symbol;Acc:MGI:98796]	GO:0004497	monooxygenase activity
Tph1	tryptophan hydroxylase 1 [Source:MGI Symbol;Acc:MGI:98796]	GO:0005506	iron ion binding
Tph1	tryptophan hydroxylase 1 [Source:MGI Symbol;Acc:MGI:98796]	GO:0009072	aromatic amino acid metabolic process
Tph1	tryptophan hydroxylase 1 [Source:MGI Symbol;Acc:MGI:98796]	GO:0004510	tryptophan 5-monooxygenase activity
Tph1	tryptophan hydroxylase 1 [Source:MGI Symbol;Acc:MGI:98796]	GO:0042427	serotonin biosynthetic process
Tph1	tryptophan hydroxylase 1 [Source:MGI Symbol;Acc:MGI:98796]	GO:0016714	oxidoreductase activity, acting on paired donors, with incorporation or reduction of molecular oxygen, reduced pteridine as one donor, and incorporation of one atom of oxygen
Tph1	tryptophan hydroxylase 1 [Source:MGI Symbol;Acc:MGI:98796]	GO:0005737	cytoplasm
Tph1	tryptophan hydroxylase 1 [Source:MGI Symbol;Acc:MGI:98796]	GO:0046872	metal ion binding
Tph1	tryptophan hydroxylase 1 [Source:MGI Symbol;Acc:MGI:98796]	GO:0043005	neuron projection
Tph1	tryptophan hydroxylase 1 [Source:MGI Symbol;Acc:MGI:98796]	GO:0046849	bone remodeling
Tph1	tryptophan hydroxylase 1 [Source:MGI Symbol;Acc:MGI:98796]	GO:0030279	negative regulation of ossification
Tph1	tryptophan hydroxylase 1 [Source:MGI Symbol;Acc:MGI:98796]	GO:0060749	mammary gland alveolus development
Tph1	tryptophan hydroxylase 1 [Source:MGI Symbol;Acc:MGI:98796]	GO:0045600	positive regulation of fat cell differentiation
Tph1	tryptophan hydroxylase 1 [Source:MGI Symbol;Acc:MGI:98796]	GO:0002576	platelet degranulation
Tph1	tryptophan hydroxylase 1 [Source:MGI Symbol;Acc:MGI:98796]	GO:0007623	circadian rhythm
Tph1	tryptophan hydroxylase 1 [Source:MGI Symbol;Acc:MGI:98796]	GO:0035902	response to immobilization stress
Tph1	tryptophan hydroxylase 1 [Source:MGI Symbol;Acc:MGI:98796]	GO:1900046	regulation of hemostasis
Tph1	tryptophan hydroxylase 1 [Source:MGI Symbol;Acc:MGI:98796]
Cck	cholecystokinin [Source:MGI Symbol;Acc:MGI:88297]	GO:0016020	membrane
Cck	cholecystokinin [Source:MGI Symbol;Acc:MGI:88297]	GO:0005576	extracellular region
Cck	cholecystokinin [Source:MGI Symbol;Acc:MGI:88297]	GO:0005179	hormone activity
Cck	cholecystokinin [Source:MGI Symbol;Acc:MGI:88297]	GO:0007586	digestion
Cck	cholecystokinin [Source:MGI Symbol;Acc:MGI:88297]	GO:0005184	neuropeptide hormone activity
Cck	cholecystokinin [Source:MGI Symbol;Acc:MGI:88297]	GO:0007165	signal transduction
Cck	cholecystokinin [Source:MGI Symbol;Acc:MGI:88297]	GO:0005515	protein binding
Cck	cholecystokinin [Source:MGI Symbol;Acc:MGI:88297]	GO:0008284	positive regulation of cell population proliferation
Cck	cholecystokinin [Source:MGI Symbol;Acc:MGI:88297]	GO:0030424	axon
Cck	cholecystokinin [Source:MGI Symbol;Acc:MGI:88297]	GO:0005615	extracellular space
Cck	cholecystokinin [Source:MGI Symbol;Acc:MGI:88297]	GO:0043025	neuronal cell body
Cck	cholecystokinin [Source:MGI Symbol;Acc:MGI:88297]	GO:0048018	receptor ligand activity
Cck	cholecystokinin [Source:MGI Symbol;Acc:MGI:88297]	GO:0030425	dendrite
Cck	cholecystokinin [Source:MGI Symbol;Acc:MGI:88297]	GO:0007613	memory
Cck	cholecystokinin [Source:MGI Symbol;Acc:MGI:88297]	GO:0008542	visual learning
Cck	cholecystokinin [Source:MGI Symbol;Acc:MGI:88297]	GO:0043204	perikaryon
Cck	cholecystokinin [Source:MGI Symbol;Acc:MGI:88297]	GO:0050731	positive regulation of peptidyl-tyrosine phosphorylation
Cck	cholecystokinin [Source:MGI Symbol;Acc:MGI:88297]	GO:0043065	positive regulation of apoptotic process
Cck	cholecystokinin [Source:MGI Symbol;Acc:MGI:88297]	GO:0098982	GABA-ergic synapse
Cck	cholecystokinin [Source:MGI Symbol;Acc:MGI:88297]	GO:0001764	neuron migration
Cck	cholecystokinin [Source:MGI Symbol;Acc:MGI:88297]	GO:0043203	axon hillock
Cck	cholecystokinin [Source:MGI Symbol;Acc:MGI:88297]	GO:0043194	axon initial segment
Cck	cholecystokinin [Source:MGI Symbol;Acc:MGI:88297]	GO:0007409	axonogenesis
Cck	cholecystokinin [Source:MGI Symbol;Acc:MGI:88297]	GO:0043195	terminal bouton
Cck	cholecystokinin [Source:MGI Symbol;Acc:MGI:88297]	GO:0032099	negative regulation of appetite
Cck	cholecystokinin [Source:MGI Symbol;Acc:MGI:88297]	GO:0042755	eating behavior
Cck	cholecystokinin [Source:MGI Symbol;Acc:MGI:88297]	GO:0014049	positive regulation of glutamate secretion
Cck	cholecystokinin [Source:MGI Symbol;Acc:MGI:88297]	GO:0001836	release of cytochrome c from mitochondria
Cck	cholecystokinin [Source:MGI Symbol;Acc:MGI:88297]	GO:0099538	synaptic signaling via neuropeptide
Cck	cholecystokinin [Source:MGI Symbol;Acc:MGI:88297]	GO:0031334	positive regulation of protein-containing complex assembly
Cck	cholecystokinin [Source:MGI Symbol;Acc:MGI:88297]	GO:0038188	cholecystokinin signaling pathway
Cck	cholecystokinin [Source:MGI Symbol;Acc:MGI:88297]	GO:0051901	positive regulation of mitochondrial depolarization
Cck	cholecystokinin [Source:MGI Symbol;Acc:MGI:88297]	GO:1903999	negative regulation of eating behavior
Cck	cholecystokinin [Source:MGI Symbol;Acc:MGI:88297]	GO:2000986	negative regulation of behavioral fear response
Cck	cholecystokinin [Source:MGI Symbol;Acc:MGI:88297]	GO:2000987	positive regulation of behavioral fear response
Mog	myelin oligodendrocyte glycoprotein [Source:MGI Symbol;Acc:MGI:97435]	GO:0016020	membrane
Mog	myelin oligodendrocyte glycoprotein [Source:MGI Symbol;Acc:MGI:97435]	GO:0007155	cell adhesion
Grin3b	glutamate receptor, ionotropic, NMDA3B [Source:MGI Symbol;Acc:MGI:2150393]	GO:0016020	membrane
Grin3b	glutamate receptor, ionotropic, NMDA3B [Source:MGI Symbol;Acc:MGI:2150393]	GO:0006811	monoatomic ion transport
Grin3b	glutamate receptor, ionotropic, NMDA3B [Source:MGI Symbol;Acc:MGI:2150393]	GO:0038023	signaling receptor activity
Grin3b	glutamate receptor, ionotropic, NMDA3B [Source:MGI Symbol;Acc:MGI:2150393]	GO:0015276	ligand-gated monoatomic ion channel activity
Grin3b	glutamate receptor, ionotropic, NMDA3B [Source:MGI Symbol;Acc:MGI:2150393]	GO:0005216	monoatomic ion channel activity
Grin3b	glutamate receptor, ionotropic, NMDA3B [Source:MGI Symbol;Acc:MGI:2150393]	GO:0005886	plasma membrane
Grin3b	glutamate receptor, ionotropic, NMDA3B [Source:MGI Symbol;Acc:MGI:2150393]	GO:0034220	monoatomic ion transmembrane transport
Grin3b	glutamate receptor, ionotropic, NMDA3B [Source:MGI Symbol;Acc:MGI:2150393]	GO:0060078	regulation of postsynaptic membrane potential
Grin3b	glutamate receptor, ionotropic, NMDA3B [Source:MGI Symbol;Acc:MGI:2150393]	GO:0045202	synapse
Grin3b	glutamate receptor, ionotropic, NMDA3B [Source:MGI Symbol;Acc:MGI:2150393]	GO:0045211	postsynaptic membrane
Grin3b	glutamate receptor, ionotropic, NMDA3B [Source:MGI Symbol;Acc:MGI:2150393]	GO:0005262	calcium channel activity
Grin3b	glutamate receptor, ionotropic, NMDA3B [Source:MGI Symbol;Acc:MGI:2150393]	GO:0098655	monoatomic cation transmembrane transport
Grin3b	glutamate receptor, ionotropic, NMDA3B [Source:MGI Symbol;Acc:MGI:2150393]	GO:0070588	calcium ion transmembrane transport
Grin3b	glutamate receptor, ionotropic, NMDA3B [Source:MGI Symbol;Acc:MGI:2150393]	GO:0043025	neuronal cell body
Grin3b	glutamate receptor, ionotropic, NMDA3B [Source:MGI Symbol;Acc:MGI:2150393]	GO:0005789	endoplasmic reticulum membrane
Grin3b	glutamate receptor, ionotropic, NMDA3B [Source:MGI Symbol;Acc:MGI:2150393]	GO:0005261	monoatomic cation channel activity
Grin3b	glutamate receptor, ionotropic, NMDA3B [Source:MGI Symbol;Acc:MGI:2150393]	GO:0098839	postsynaptic density membrane
Grin3b	glutamate receptor, ionotropic, NMDA3B [Source:MGI Symbol;Acc:MGI:2150393]	GO:0017146	NMDA selective glutamate receptor complex
Grin3b	glutamate receptor, ionotropic, NMDA3B [Source:MGI Symbol;Acc:MGI:2150393]	GO:0099505	regulation of presynaptic membrane potential
Grin3b	glutamate receptor, ionotropic, NMDA3B [Source:MGI Symbol;Acc:MGI:2150393]	GO:0008066	glutamate receptor activity
Grin3b	glutamate receptor, ionotropic, NMDA3B [Source:MGI Symbol;Acc:MGI:2150393]	GO:0016594	glycine binding
Grin3b	glutamate receptor, ionotropic, NMDA3B [Source:MGI Symbol;Acc:MGI:2150393]	GO:1904315	transmitter-gated monoatomic ion channel activity involved in regulation of postsynaptic membrane potential
Grin3b	glutamate receptor, ionotropic, NMDA3B [Source:MGI Symbol;Acc:MGI:2150393]	GO:0035235	ionotropic glutamate receptor signaling pathway
Grin3b	glutamate receptor, ionotropic, NMDA3B [Source:MGI Symbol;Acc:MGI:2150393]	GO:0035249	synaptic transmission, glutamatergic
Grin3b	glutamate receptor, ionotropic, NMDA3B [Source:MGI Symbol;Acc:MGI:2150393]	GO:0050804	modulation of chemical synaptic transmission
Grin3b	glutamate receptor, ionotropic, NMDA3B [Source:MGI Symbol;Acc:MGI:2150393]	GO:0048787	presynaptic active zone membrane
Grin3b	glutamate receptor, ionotropic, NMDA3B [Source:MGI Symbol;Acc:MGI:2150393]	GO:0098686	hippocampal mossy fiber to CA3 synapse
Grin3b	glutamate receptor, ionotropic, NMDA3B [Source:MGI Symbol;Acc:MGI:2150393]	GO:0030594	neurotransmitter receptor activity
Grin3b	glutamate receptor, ionotropic, NMDA3B [Source:MGI Symbol;Acc:MGI:2150393]	GO:0004972	NMDA glutamate receptor activity
Grin3b	glutamate receptor, ionotropic, NMDA3B [Source:MGI Symbol;Acc:MGI:2150393]	GO:1905430	cellular response to glycine
Grin3b	glutamate receptor, ionotropic, NMDA3B [Source:MGI Symbol;Acc:MGI:2150393]	GO:0051924	regulation of calcium ion transport
Grin3b	glutamate receptor, ionotropic, NMDA3B [Source:MGI Symbol;Acc:MGI:2150393]	GO:0099507	ligand-gated monoatomic ion channel activity involved in regulation of presynaptic membrane potential
Grin3b	glutamate receptor, ionotropic, NMDA3B [Source:MGI Symbol;Acc:MGI:2150393]	GO:0051205	protein insertion into membrane
Mmp2	matrix metallopeptidase 2 [Source:MGI Symbol;Acc:MGI:97009]	GO:0008270	zinc ion binding
Mmp2	matrix metallopeptidase 2 [Source:MGI Symbol;Acc:MGI:97009]	GO:0006508	proteolysis
Mmp2	matrix metallopeptidase 2 [Source:MGI Symbol;Acc:MGI:97009]	GO:0008237	metallopeptidase activity
Mmp2	matrix metallopeptidase 2 [Source:MGI Symbol;Acc:MGI:97009]	GO:0004222	metalloendopeptidase activity
Mmp2	matrix metallopeptidase 2 [Source:MGI Symbol;Acc:MGI:97009]	GO:0031012	extracellular matrix
Mmp2	matrix metallopeptidase 2 [Source:MGI Symbol;Acc:MGI:97009]	GO:0071230	cellular response to amino acid stimulus
Mmp2	matrix metallopeptidase 2 [Source:MGI Symbol;Acc:MGI:97009]	GO:0048771	tissue remodeling
Mmp2	matrix metallopeptidase 2 [Source:MGI Symbol;Acc:MGI:97009]	GO:0007566	embryo implantation
Mmp2	matrix metallopeptidase 2 [Source:MGI Symbol;Acc:MGI:97009]	GO:0016477	cell migration
Mmp2	matrix metallopeptidase 2 [Source:MGI Symbol;Acc:MGI:97009]	GO:0007507	heart development
Mmp2	matrix metallopeptidase 2 [Source:MGI Symbol;Acc:MGI:97009]	GO:0043627	response to estrogen
Mmp2	matrix metallopeptidase 2 [Source:MGI Symbol;Acc:MGI:97009]	GO:0005634	nucleus
Mmp2	matrix metallopeptidase 2 [Source:MGI Symbol;Acc:MGI:97009]	GO:0005737	cytoplasm
Mmp2	matrix metallopeptidase 2 [Source:MGI Symbol;Acc:MGI:97009]	GO:0016020	membrane
Mmp2	matrix metallopeptidase 2 [Source:MGI Symbol;Acc:MGI:97009]	GO:0046872	metal ion binding
Mmp2	matrix metallopeptidase 2 [Source:MGI Symbol;Acc:MGI:97009]	GO:0005615	extracellular space
Mmp2	matrix metallopeptidase 2 [Source:MGI Symbol;Acc:MGI:97009]	GO:0008233	peptidase activity
Mmp2	matrix metallopeptidase 2 [Source:MGI Symbol;Acc:MGI:97009]	GO:0005739	mitochondrion
Mmp2	matrix metallopeptidase 2 [Source:MGI Symbol;Acc:MGI:97009]	GO:0005576	extracellular region
Mmp2	matrix metallopeptidase 2 [Source:MGI Symbol;Acc:MGI:97009]	GO:0005886	plasma membrane
Mmp2	matrix metallopeptidase 2 [Source:MGI Symbol;Acc:MGI:97009]	GO:0001525	angiogenesis
Mmp2	matrix metallopeptidase 2 [Source:MGI Symbol;Acc:MGI:97009]	GO:0009410	response to xenobiotic stimulus
Mmp2	matrix metallopeptidase 2 [Source:MGI Symbol;Acc:MGI:97009]	GO:0048705	skeletal system morphogenesis
Mmp2	matrix metallopeptidase 2 [Source:MGI Symbol;Acc:MGI:97009]	GO:0060325	face morphogenesis
Mmp2	matrix metallopeptidase 2 [Source:MGI Symbol;Acc:MGI:97009]	GO:0030198	extracellular matrix organization
Mmp2	matrix metallopeptidase 2 [Source:MGI Symbol;Acc:MGI:97009]	GO:0001666	response to hypoxia
Mmp2	matrix metallopeptidase 2 [Source:MGI Symbol;Acc:MGI:97009]	GO:0001541	ovarian follicle development
Mmp2	matrix metallopeptidase 2 [Source:MGI Symbol;Acc:MGI:97009]	GO:0030163	protein catabolic process
Mmp2	matrix metallopeptidase 2 [Source:MGI Symbol;Acc:MGI:97009]	GO:0043065	positive regulation of apoptotic process
Mmp2	matrix metallopeptidase 2 [Source:MGI Symbol;Acc:MGI:97009]	GO:0030017	sarcomere
Mmp2	matrix metallopeptidase 2 [Source:MGI Symbol;Acc:MGI:97009]	GO:0030335	positive regulation of cell migration
Mmp2	matrix metallopeptidase 2 [Source:MGI Symbol;Acc:MGI:97009]	GO:0030574	collagen catabolic process
Mmp2	matrix metallopeptidase 2 [Source:MGI Symbol;Acc:MGI:97009]	GO:0001957	intramembranous ossification
Mmp2	matrix metallopeptidase 2 [Source:MGI Symbol;Acc:MGI:97009]	GO:0048661	positive regulation of smooth muscle cell proliferation
Mmp2	matrix metallopeptidase 2 [Source:MGI Symbol;Acc:MGI:97009]	GO:0006979	response to oxidative stress
Mmp2	matrix metallopeptidase 2 [Source:MGI Symbol;Acc:MGI:97009]	GO:0060740	prostate gland epithelium morphogenesis
Mmp2	matrix metallopeptidase 2 [Source:MGI Symbol;Acc:MGI:97009]	GO:0042542	response to hydrogen peroxide
Mmp2	matrix metallopeptidase 2 [Source:MGI Symbol;Acc:MGI:97009]	GO:0045906	negative regulation of vasoconstriction
Mmp2	matrix metallopeptidase 2 [Source:MGI Symbol;Acc:MGI:97009]	GO:0009612	response to mechanical stimulus
Mmp2	matrix metallopeptidase 2 [Source:MGI Symbol;Acc:MGI:97009]	GO:0001968	fibronectin binding
Mmp2	matrix metallopeptidase 2 [Source:MGI Symbol;Acc:MGI:97009]	GO:0034614	cellular response to reactive oxygen species
Mmp2	matrix metallopeptidase 2 [Source:MGI Symbol;Acc:MGI:97009]	GO:1904645	response to amyloid-beta
Mmp2	matrix metallopeptidase 2 [Source:MGI Symbol;Acc:MGI:97009]	GO:0014012	peripheral nervous system axon regeneration
Mmp2	matrix metallopeptidase 2 [Source:MGI Symbol;Acc:MGI:97009]	GO:0048246	macrophage chemotaxis
Mmp2	matrix metallopeptidase 2 [Source:MGI Symbol;Acc:MGI:97009]	GO:0060346	bone trabecula formation
Mmp2	matrix metallopeptidase 2 [Source:MGI Symbol;Acc:MGI:97009]	GO:0071492	cellular response to UV-A
Mmp2	matrix metallopeptidase 2 [Source:MGI Symbol;Acc:MGI:97009]	GO:0007162	negative regulation of cell adhesion
Mmp2	matrix metallopeptidase 2 [Source:MGI Symbol;Acc:MGI:97009]	GO:0071392	cellular response to estradiol stimulus
Mmp2	matrix metallopeptidase 2 [Source:MGI Symbol;Acc:MGI:97009]	GO:0001955	blood vessel maturation
Mmp2	matrix metallopeptidase 2 [Source:MGI Symbol;Acc:MGI:97009]	GO:0004175	endopeptidase activity
Mmp2	matrix metallopeptidase 2 [Source:MGI Symbol;Acc:MGI:97009]	GO:0001542	ovulation from ovarian follicle
Mmp2	matrix metallopeptidase 2 [Source:MGI Symbol;Acc:MGI:97009]	GO:0001553	luteinization
Mmp2	matrix metallopeptidase 2 [Source:MGI Symbol;Acc:MGI:97009]	GO:0007565	female pregnancy
Mmp2	matrix metallopeptidase 2 [Source:MGI Symbol;Acc:MGI:97009]	GO:0007567	parturition
Mmp2	matrix metallopeptidase 2 [Source:MGI Symbol;Acc:MGI:97009]	GO:0014823	response to activity
Mmp2	matrix metallopeptidase 2 [Source:MGI Symbol;Acc:MGI:97009]	GO:0032526	response to retinoic acid
Mmp2	matrix metallopeptidase 2 [Source:MGI Symbol;Acc:MGI:97009]	GO:0034097	response to cytokine
Mmp2	matrix metallopeptidase 2 [Source:MGI Symbol;Acc:MGI:97009]	GO:0035094	response to nicotine
Mmp2	matrix metallopeptidase 2 [Source:MGI Symbol;Acc:MGI:97009]	GO:0035987	endodermal cell differentiation
Mmp2	matrix metallopeptidase 2 [Source:MGI Symbol;Acc:MGI:97009]	GO:0051602	response to electrical stimulus
Mmp2	matrix metallopeptidase 2 [Source:MGI Symbol;Acc:MGI:97009]	GO:0055093	response to hyperoxia
Mmp2	matrix metallopeptidase 2 [Source:MGI Symbol;Acc:MGI:97009]	GO:0071345	cellular response to cytokine stimulus
Mmp2	matrix metallopeptidase 2 [Source:MGI Symbol;Acc:MGI:97009]	GO:0071347	cellular response to interleukin-1
Mmp2	matrix metallopeptidase 2 [Source:MGI Symbol;Acc:MGI:97009]	GO:0071498	cellular response to fluid shear stress
Mmp2	matrix metallopeptidase 2 [Source:MGI Symbol;Acc:MGI:97009]	GO:1903378	positive regulation of oxidative stress-induced neuron intrinsic apoptotic signaling pathway
Mmp2	matrix metallopeptidase 2 [Source:MGI Symbol;Acc:MGI:97009]	GO:1904707	positive regulation of vascular associated smooth muscle cell proliferation
Mmp2	matrix metallopeptidase 2 [Source:MGI Symbol;Acc:MGI:97009]
Cadps2	Ca2+-dependent activator protein for secretion 2 [Source:MGI Symbol;Acc:MGI:2443963]	GO:0016079	synaptic vesicle exocytosis
Cadps2	Ca2+-dependent activator protein for secretion 2 [Source:MGI Symbol;Acc:MGI:2443963]	GO:1990504	dense core granule exocytosis
Cadps2	Ca2+-dependent activator protein for secretion 2 [Source:MGI Symbol;Acc:MGI:2443963]	GO:0005515	protein binding
Cadps2	Ca2+-dependent activator protein for secretion 2 [Source:MGI Symbol;Acc:MGI:2443963]	GO:0016020	membrane
Cadps2	Ca2+-dependent activator protein for secretion 2 [Source:MGI Symbol;Acc:MGI:2443963]	GO:0046872	metal ion binding
Cadps2	Ca2+-dependent activator protein for secretion 2 [Source:MGI Symbol;Acc:MGI:2443963]	GO:0015031	protein transport
Cadps2	Ca2+-dependent activator protein for secretion 2 [Source:MGI Symbol;Acc:MGI:2443963]	GO:0031410	cytoplasmic vesicle
Cadps2	Ca2+-dependent activator protein for secretion 2 [Source:MGI Symbol;Acc:MGI:2443963]	GO:0045202	synapse
Cadps2	Ca2+-dependent activator protein for secretion 2 [Source:MGI Symbol;Acc:MGI:2443963]	GO:0030659	cytoplasmic vesicle membrane
Cadps2	Ca2+-dependent activator protein for secretion 2 [Source:MGI Symbol;Acc:MGI:2443963]	GO:0098688	parallel fiber to Purkinje cell synapse
Cadps2	Ca2+-dependent activator protein for secretion 2 [Source:MGI Symbol;Acc:MGI:2443963]	GO:0098793	presynapse
Cadps2	Ca2+-dependent activator protein for secretion 2 [Source:MGI Symbol;Acc:MGI:2443963]	GO:0098978	glutamatergic synapse
Cadps2	Ca2+-dependent activator protein for secretion 2 [Source:MGI Symbol;Acc:MGI:2443963]	GO:0008289	lipid binding
Cadps2	Ca2+-dependent activator protein for secretion 2 [Source:MGI Symbol;Acc:MGI:2443963]	GO:0006887	exocytosis
Cadps2	Ca2+-dependent activator protein for secretion 2 [Source:MGI Symbol;Acc:MGI:2443963]	GO:0061484	hematopoietic stem cell homeostasis
Cadps2	Ca2+-dependent activator protein for secretion 2 [Source:MGI Symbol;Acc:MGI:2443963]	GO:0009267	cellular response to starvation
Cadps2	Ca2+-dependent activator protein for secretion 2 [Source:MGI Symbol;Acc:MGI:2443963]	GO:0045211	postsynaptic membrane
Cadps2	Ca2+-dependent activator protein for secretion 2 [Source:MGI Symbol;Acc:MGI:2443963]	GO:0042734	presynaptic membrane
Cadps2	Ca2+-dependent activator protein for secretion 2 [Source:MGI Symbol;Acc:MGI:2443963]	GO:0016082	synaptic vesicle priming
Cadps2	Ca2+-dependent activator protein for secretion 2 [Source:MGI Symbol;Acc:MGI:2443963]	GO:0045921	positive regulation of exocytosis
Cadps2	Ca2+-dependent activator protein for secretion 2 [Source:MGI Symbol;Acc:MGI:2443963]
Cadps2	Ca2+-dependent activator protein for secretion 2 [Source:MGI Symbol;Acc:MGI:2443963]	GO:0005654	nucleoplasm
Cadps2	Ca2+-dependent activator protein for secretion 2 [Source:MGI Symbol;Acc:MGI:2443963]	GO:0043231	intracellular membrane-bounded organelle
Scn10a	sodium channel, voltage-gated, type X, alpha [Source:MGI Symbol;Acc:MGI:108029]	GO:0016020	membrane
Scn10a	sodium channel, voltage-gated, type X, alpha [Source:MGI Symbol;Acc:MGI:108029]	GO:0055085	transmembrane transport
Scn10a	sodium channel, voltage-gated, type X, alpha [Source:MGI Symbol;Acc:MGI:108029]	GO:0006811	monoatomic ion transport
Scn10a	sodium channel, voltage-gated, type X, alpha [Source:MGI Symbol;Acc:MGI:108029]	GO:0006814	sodium ion transport
Scn10a	sodium channel, voltage-gated, type X, alpha [Source:MGI Symbol;Acc:MGI:108029]	GO:0005886	plasma membrane
Scn10a	sodium channel, voltage-gated, type X, alpha [Source:MGI Symbol;Acc:MGI:108029]	GO:0005216	monoatomic ion channel activity
Scn10a	sodium channel, voltage-gated, type X, alpha [Source:MGI Symbol;Acc:MGI:108029]	GO:0005248	voltage-gated sodium channel activity
Scn10a	sodium channel, voltage-gated, type X, alpha [Source:MGI Symbol;Acc:MGI:108029]	GO:0001518	voltage-gated sodium channel complex
Scn10a	sodium channel, voltage-gated, type X, alpha [Source:MGI Symbol;Acc:MGI:108029]	GO:0005261	monoatomic cation channel activity
Scn10a	sodium channel, voltage-gated, type X, alpha [Source:MGI Symbol;Acc:MGI:108029]	GO:0034220	monoatomic ion transmembrane transport
Scn10a	sodium channel, voltage-gated, type X, alpha [Source:MGI Symbol;Acc:MGI:108029]	GO:0034702	monoatomic ion channel complex
Scn10a	sodium channel, voltage-gated, type X, alpha [Source:MGI Symbol;Acc:MGI:108029]	GO:0005272	sodium channel activity
Scn10a	sodium channel, voltage-gated, type X, alpha [Source:MGI Symbol;Acc:MGI:108029]	GO:0099505	regulation of presynaptic membrane potential
Scn10a	sodium channel, voltage-gated, type X, alpha [Source:MGI Symbol;Acc:MGI:108029]	GO:0044325	transmembrane transporter binding
Scn10a	sodium channel, voltage-gated, type X, alpha [Source:MGI Symbol;Acc:MGI:108029]	GO:0099508	voltage-gated monoatomic ion channel activity involved in regulation of presynaptic membrane potential
Scn10a	sodium channel, voltage-gated, type X, alpha [Source:MGI Symbol;Acc:MGI:108029]	GO:0002027	regulation of heart rate
Scn10a	sodium channel, voltage-gated, type X, alpha [Source:MGI Symbol;Acc:MGI:108029]	GO:0034765	regulation of monoatomic ion transmembrane transport
Scn10a	sodium channel, voltage-gated, type X, alpha [Source:MGI Symbol;Acc:MGI:108029]	GO:0035725	sodium ion transmembrane transport
Scn10a	sodium channel, voltage-gated, type X, alpha [Source:MGI Symbol;Acc:MGI:108029]	GO:0042475	odontogenesis of dentin-containing tooth
Scn10a	sodium channel, voltage-gated, type X, alpha [Source:MGI Symbol;Acc:MGI:108029]	GO:0055117	regulation of cardiac muscle contraction
Scn10a	sodium channel, voltage-gated, type X, alpha [Source:MGI Symbol;Acc:MGI:108029]	GO:0060371	regulation of atrial cardiac muscle cell membrane depolarization
Scn10a	sodium channel, voltage-gated, type X, alpha [Source:MGI Symbol;Acc:MGI:108029]	GO:0086010	membrane depolarization during action potential
Scn10a	sodium channel, voltage-gated, type X, alpha [Source:MGI Symbol;Acc:MGI:108029]	GO:0086016	AV node cell action potential
Scn10a	sodium channel, voltage-gated, type X, alpha [Source:MGI Symbol;Acc:MGI:108029]	GO:0086043	bundle of His cell action potential
Scn10a	sodium channel, voltage-gated, type X, alpha [Source:MGI Symbol;Acc:MGI:108029]	GO:0030424	axon
Scn10a	sodium channel, voltage-gated, type X, alpha [Source:MGI Symbol;Acc:MGI:108029]	GO:0042734	presynaptic membrane
Scn10a	sodium channel, voltage-gated, type X, alpha [Source:MGI Symbol;Acc:MGI:108029]	GO:0098978	glutamatergic synapse
Scn10a	sodium channel, voltage-gated, type X, alpha [Source:MGI Symbol;Acc:MGI:108029]	GO:0071439	clathrin complex
Scn10a	sodium channel, voltage-gated, type X, alpha [Source:MGI Symbol;Acc:MGI:108029]	GO:0061337	cardiac conduction
Scn10a	sodium channel, voltage-gated, type X, alpha [Source:MGI Symbol;Acc:MGI:108029]	GO:0051649	establishment of localization in cell
Scn10a	sodium channel, voltage-gated, type X, alpha [Source:MGI Symbol;Acc:MGI:108029]	GO:0050965	detection of temperature stimulus involved in sensory perception of pain
Scn10a	sodium channel, voltage-gated, type X, alpha [Source:MGI Symbol;Acc:MGI:108029]	GO:0007623	circadian rhythm
Scn10a	sodium channel, voltage-gated, type X, alpha [Source:MGI Symbol;Acc:MGI:108029]	GO:0019228	neuronal action potential
Scn10a	sodium channel, voltage-gated, type X, alpha [Source:MGI Symbol;Acc:MGI:108029]	GO:0048266	behavioral response to pain
Scn10a	sodium channel, voltage-gated, type X, alpha [Source:MGI Symbol;Acc:MGI:108029]	GO:0050974	detection of mechanical stimulus involved in sensory perception
Scn10a	sodium channel, voltage-gated, type X, alpha [Source:MGI Symbol;Acc:MGI:108029]	GO:0044299	C-fiber
Scn10a	sodium channel, voltage-gated, type X, alpha [Source:MGI Symbol;Acc:MGI:108029]	GO:0086006	voltage-gated sodium channel activity involved in cardiac muscle cell action potential
Scn10a	sodium channel, voltage-gated, type X, alpha [Source:MGI Symbol;Acc:MGI:108029]	GO:0086012	membrane depolarization during cardiac muscle cell action potential
Scn10a	sodium channel, voltage-gated, type X, alpha [Source:MGI Symbol;Acc:MGI:108029]
Ptn	pleiotrophin [Source:MGI Symbol;Acc:MGI:97804]	GO:0008083	growth factor activity
Ptn	pleiotrophin [Source:MGI Symbol;Acc:MGI:97804]	GO:0001503	ossification
Ptn	pleiotrophin [Source:MGI Symbol;Acc:MGI:97804]	GO:0010976	positive regulation of neuron projection development
Ptn	pleiotrophin [Source:MGI Symbol;Acc:MGI:97804]	GO:0016525	negative regulation of angiogenesis
Ptn	pleiotrophin [Source:MGI Symbol;Acc:MGI:97804]	GO:0050680	negative regulation of epithelial cell proliferation
[truncated: 791 more rows]
