# Supplementary material for: Unraveling the brain expression of BDNF in a mouse model of Anorexia Nervosa
Source: Research Square preprint supplement (doi:10.21203/rs.3.rs-6260210/v1), 2025-04-16
Supplement: Supplementary file 6 [file b49ab87af14b8eb0726953db.xlsx]

## Sheet: Supplementary Table 8
Supplementary Table 8: Functional Annotation of Differentially Expressed Genes in the prefrontal cortex from Supplementary Table 6
external_gene_name	description	go_id	name_1006
Chrdl2	chordin-like 2 [Source:MGI Symbol;Acc:MGI:1916371]
Chrdl2	chordin-like 2 [Source:MGI Symbol;Acc:MGI:1916371]	GO:0005515	protein binding
Chrdl2	chordin-like 2 [Source:MGI Symbol;Acc:MGI:1916371]	GO:0005576	extracellular region
Zbtb48	zinc finger and BTB domain containing 48 [Source:MGI Symbol;Acc:MGI:2140248]	GO:0005515	protein binding
Zbtb48	zinc finger and BTB domain containing 48 [Source:MGI Symbol;Acc:MGI:2140248]	GO:0005634	nucleus
Zbtb48	zinc finger and BTB domain containing 48 [Source:MGI Symbol;Acc:MGI:2140248]	GO:0046872	metal ion binding
Zbtb48	zinc finger and BTB domain containing 48 [Source:MGI Symbol;Acc:MGI:2140248]	GO:0003677	DNA binding
Zbtb48	zinc finger and BTB domain containing 48 [Source:MGI Symbol;Acc:MGI:2140248]	GO:0000981	DNA-binding transcription factor activity, RNA polymerase II-specific
Zbtb48	zinc finger and BTB domain containing 48 [Source:MGI Symbol;Acc:MGI:2140248]	GO:0006357	regulation of transcription by RNA polymerase II
Zbtb48	zinc finger and BTB domain containing 48 [Source:MGI Symbol;Acc:MGI:2140248]	GO:0005694	chromosome
Zbtb48	zinc finger and BTB domain containing 48 [Source:MGI Symbol;Acc:MGI:2140248]	GO:0000781	chromosome, telomeric region
Zbtb48	zinc finger and BTB domain containing 48 [Source:MGI Symbol;Acc:MGI:2140248]	GO:0045893	positive regulation of DNA-templated transcription
Zbtb48	zinc finger and BTB domain containing 48 [Source:MGI Symbol;Acc:MGI:2140248]	GO:0000976	transcription cis-regulatory region binding
Zbtb48	zinc finger and BTB domain containing 48 [Source:MGI Symbol;Acc:MGI:2140248]	GO:0010833	telomere maintenance via telomere lengthening
Zbtb48	zinc finger and BTB domain containing 48 [Source:MGI Symbol;Acc:MGI:2140248]	GO:0043565	sequence-specific DNA binding
Zbtb48	zinc finger and BTB domain containing 48 [Source:MGI Symbol;Acc:MGI:2140248]	GO:0003691	double-stranded telomeric DNA binding
Zbtb48	zinc finger and BTB domain containing 48 [Source:MGI Symbol;Acc:MGI:2140248]	GO:0042802	identical protein binding
Zbtb48	zinc finger and BTB domain containing 48 [Source:MGI Symbol;Acc:MGI:2140248]
Atat1	alpha tubulin acetyltransferase 1 [Source:MGI Symbol;Acc:MGI:1913869]	GO:0005874	microtubule
Atat1	alpha tubulin acetyltransferase 1 [Source:MGI Symbol;Acc:MGI:1913869]	GO:0019799	tubulin N-acetyltransferase activity
Atat1	alpha tubulin acetyltransferase 1 [Source:MGI Symbol;Acc:MGI:1913869]	GO:0071929	alpha-tubulin acetylation
Atat1	alpha tubulin acetyltransferase 1 [Source:MGI Symbol;Acc:MGI:1913869]	GO:0007283	spermatogenesis
Atat1	alpha tubulin acetyltransferase 1 [Source:MGI Symbol;Acc:MGI:1913869]	GO:0045598	regulation of fat cell differentiation
Atat1	alpha tubulin acetyltransferase 1 [Source:MGI Symbol;Acc:MGI:1913869]	GO:0042995	cell projection
Atat1	alpha tubulin acetyltransferase 1 [Source:MGI Symbol;Acc:MGI:1913869]	GO:0005737	cytoplasm
Atat1	alpha tubulin acetyltransferase 1 [Source:MGI Symbol;Acc:MGI:1913869]	GO:0070161	anchoring junction
Atat1	alpha tubulin acetyltransferase 1 [Source:MGI Symbol;Acc:MGI:1913869]	GO:0005856	cytoskeleton
Atat1	alpha tubulin acetyltransferase 1 [Source:MGI Symbol;Acc:MGI:1913869]	GO:0005925	focal adhesion
Atat1	alpha tubulin acetyltransferase 1 [Source:MGI Symbol;Acc:MGI:1913869]	GO:0030424	axon
Atat1	alpha tubulin acetyltransferase 1 [Source:MGI Symbol;Acc:MGI:1913869]	GO:0016020	membrane
Atat1	alpha tubulin acetyltransferase 1 [Source:MGI Symbol;Acc:MGI:1913869]	GO:0016746	acyltransferase activity
Atat1	alpha tubulin acetyltransferase 1 [Source:MGI Symbol;Acc:MGI:1913869]	GO:0005819	spindle
Atat1	alpha tubulin acetyltransferase 1 [Source:MGI Symbol;Acc:MGI:1913869]	GO:0048666	neuron development
Atat1	alpha tubulin acetyltransferase 1 [Source:MGI Symbol;Acc:MGI:1913869]	GO:0000226	microtubule cytoskeleton organization
Atat1	alpha tubulin acetyltransferase 1 [Source:MGI Symbol;Acc:MGI:1913869]	GO:0005905	clathrin-coated pit
Atat1	alpha tubulin acetyltransferase 1 [Source:MGI Symbol;Acc:MGI:1913869]	GO:0072686	mitotic spindle
Atat1	alpha tubulin acetyltransferase 1 [Source:MGI Symbol;Acc:MGI:1913869]	GO:0021542	dentate gyrus development
Atat1	alpha tubulin acetyltransferase 1 [Source:MGI Symbol;Acc:MGI:1913869]	GO:0004468	lysine N-acetyltransferase activity, acting on acetyl phosphate as donor
Atat1	alpha tubulin acetyltransferase 1 [Source:MGI Symbol;Acc:MGI:1913869]	GO:0016407	acetyltransferase activity
Atat1	alpha tubulin acetyltransferase 1 [Source:MGI Symbol;Acc:MGI:1913869]	GO:0070507	regulation of microtubule cytoskeleton organization
Atat1	alpha tubulin acetyltransferase 1 [Source:MGI Symbol;Acc:MGI:1913869]	GO:0009612	response to mechanical stimulus
Atat1	alpha tubulin acetyltransferase 1 [Source:MGI Symbol;Acc:MGI:1913869]	GO:0048265	response to pain
Atat1	alpha tubulin acetyltransferase 1 [Source:MGI Symbol;Acc:MGI:1913869]	GO:0044546	NLRP3 inflammasome complex assembly
Atat1	alpha tubulin acetyltransferase 1 [Source:MGI Symbol;Acc:MGI:1913869]	GO:1900227	positive regulation of NLRP3 inflammasome complex assembly
Atat1	alpha tubulin acetyltransferase 1 [Source:MGI Symbol;Acc:MGI:1913869]	GO:0005794	Golgi apparatus
Atat1	alpha tubulin acetyltransferase 1 [Source:MGI Symbol;Acc:MGI:1913869]	GO:0005829	cytosol
Atat1	alpha tubulin acetyltransferase 1 [Source:MGI Symbol;Acc:MGI:1913869]	GO:0097427	microtubule bundle
Atat1	alpha tubulin acetyltransferase 1 [Source:MGI Symbol;Acc:MGI:1913869]
Tceal5	transcription elongation factor A (SII)-like 5 [Source:MGI Symbol;Acc:MGI:3036236]	GO:0005634	nucleus
Tceal5	transcription elongation factor A (SII)-like 5 [Source:MGI Symbol;Acc:MGI:3036236]	GO:0003746	translation elongation factor activity
Tceal5	transcription elongation factor A (SII)-like 5 [Source:MGI Symbol;Acc:MGI:3036236]	GO:0006414	translational elongation
Tceal5	transcription elongation factor A (SII)-like 5 [Source:MGI Symbol;Acc:MGI:3036236]
Tuba1c	tubulin, alpha 1C [Source:MGI Symbol;Acc:MGI:1095409]	GO:0005525	GTP binding
Tuba1c	tubulin, alpha 1C [Source:MGI Symbol;Acc:MGI:1095409]	GO:0007017	microtubule-based process
Tuba1c	tubulin, alpha 1C [Source:MGI Symbol;Acc:MGI:1095409]	GO:0005874	microtubule
Tuba1c	tubulin, alpha 1C [Source:MGI Symbol;Acc:MGI:1095409]	GO:0005200	structural constituent of cytoskeleton
Tuba1c	tubulin, alpha 1C [Source:MGI Symbol;Acc:MGI:1095409]	GO:0005737	cytoplasm
Tuba1c	tubulin, alpha 1C [Source:MGI Symbol;Acc:MGI:1095409]	GO:0046872	metal ion binding
Tuba1c	tubulin, alpha 1C [Source:MGI Symbol;Acc:MGI:1095409]	GO:0016787	hydrolase activity
Tuba1c	tubulin, alpha 1C [Source:MGI Symbol;Acc:MGI:1095409]	GO:0005856	cytoskeleton
Tuba1c	tubulin, alpha 1C [Source:MGI Symbol;Acc:MGI:1095409]	GO:0000226	microtubule cytoskeleton organization
Tuba1c	tubulin, alpha 1C [Source:MGI Symbol;Acc:MGI:1095409]	GO:0000278	mitotic cell cycle
Tuba1c	tubulin, alpha 1C [Source:MGI Symbol;Acc:MGI:1095409]	GO:0045121	membrane raft
Tuba1c	tubulin, alpha 1C [Source:MGI Symbol;Acc:MGI:1095409]	GO:0005881	cytoplasmic microtubule
Tuba1c	tubulin, alpha 1C [Source:MGI Symbol;Acc:MGI:1095409]	GO:0005634	nucleus
Tuba1c	tubulin, alpha 1C [Source:MGI Symbol;Acc:MGI:1095409]	GO:0015630	microtubule cytoskeleton
Tuba1c	tubulin, alpha 1C [Source:MGI Symbol;Acc:MGI:1095409]
Cyp2s1	cytochrome P450, family 2, subfamily s, polypeptide 1 [Source:MGI Symbol;Acc:MGI:1921384]	GO:0004497	monooxygenase activity
Cyp2s1	cytochrome P450, family 2, subfamily s, polypeptide 1 [Source:MGI Symbol;Acc:MGI:1921384]	GO:0020037	heme binding
Cyp2s1	cytochrome P450, family 2, subfamily s, polypeptide 1 [Source:MGI Symbol;Acc:MGI:1921384]	GO:0005506	iron ion binding
Cyp2s1	cytochrome P450, family 2, subfamily s, polypeptide 1 [Source:MGI Symbol;Acc:MGI:1921384]	GO:0016705	oxidoreductase activity, acting on paired donors, with incorporation or reduction of molecular oxygen
Cyp2s1	cytochrome P450, family 2, subfamily s, polypeptide 1 [Source:MGI Symbol;Acc:MGI:1921384]	GO:0016712	oxidoreductase activity, acting on paired donors, with incorporation or reduction of molecular oxygen, reduced flavin or flavoprotein as one donor, and incorporation of one atom of oxygen
Cyp2s1	cytochrome P450, family 2, subfamily s, polypeptide 1 [Source:MGI Symbol;Acc:MGI:1921384]	GO:0016020	membrane
Cyp2s1	cytochrome P450, family 2, subfamily s, polypeptide 1 [Source:MGI Symbol;Acc:MGI:1921384]	GO:0046872	metal ion binding
Cyp2s1	cytochrome P450, family 2, subfamily s, polypeptide 1 [Source:MGI Symbol;Acc:MGI:1921384]	GO:0005783	endoplasmic reticulum
Cyp2s1	cytochrome P450, family 2, subfamily s, polypeptide 1 [Source:MGI Symbol;Acc:MGI:1921384]	GO:0005789	endoplasmic reticulum membrane
Cyp2s1	cytochrome P450, family 2, subfamily s, polypeptide 1 [Source:MGI Symbol;Acc:MGI:1921384]	GO:0043231	intracellular membrane-bounded organelle
Cyp2s1	cytochrome P450, family 2, subfamily s, polypeptide 1 [Source:MGI Symbol;Acc:MGI:1921384]	GO:0005737	cytoplasm
Cyp2s1	cytochrome P450, family 2, subfamily s, polypeptide 1 [Source:MGI Symbol;Acc:MGI:1921384]	GO:0016829	lyase activity
Cyp2s1	cytochrome P450, family 2, subfamily s, polypeptide 1 [Source:MGI Symbol;Acc:MGI:1921384]	GO:0006631	fatty acid metabolic process
Cyp2s1	cytochrome P450, family 2, subfamily s, polypeptide 1 [Source:MGI Symbol;Acc:MGI:1921384]	GO:0016853	isomerase activity
Cyp2s1	cytochrome P450, family 2, subfamily s, polypeptide 1 [Source:MGI Symbol;Acc:MGI:1921384]	GO:0006805	xenobiotic metabolic process
Cyp2s1	cytochrome P450, family 2, subfamily s, polypeptide 1 [Source:MGI Symbol;Acc:MGI:1921384]	GO:0008392	arachidonic acid epoxygenase activity
Cyp2s1	cytochrome P450, family 2, subfamily s, polypeptide 1 [Source:MGI Symbol;Acc:MGI:1921384]	GO:0019373	epoxygenase P450 pathway
Cyp2s1	cytochrome P450, family 2, subfamily s, polypeptide 1 [Source:MGI Symbol;Acc:MGI:1921384]	GO:0106256	hydroperoxy icosatetraenoate dehydratase activity
Cyp2s1	cytochrome P450, family 2, subfamily s, polypeptide 1 [Source:MGI Symbol;Acc:MGI:1921384]	GO:0004796	thromboxane-A synthase activity
Cyp2s1	cytochrome P450, family 2, subfamily s, polypeptide 1 [Source:MGI Symbol;Acc:MGI:1921384]	GO:0036134	12-hydroxyheptadecatrienoic acid synthase activity
Cyp2s1	cytochrome P450, family 2, subfamily s, polypeptide 1 [Source:MGI Symbol;Acc:MGI:1921384]	GO:0016836	hydro-lyase activity
Cyp2s1	cytochrome P450, family 2, subfamily s, polypeptide 1 [Source:MGI Symbol;Acc:MGI:1921384]	GO:0006690	icosanoid metabolic process
Cyp2s1	cytochrome P450, family 2, subfamily s, polypeptide 1 [Source:MGI Symbol;Acc:MGI:1921384]	GO:0006693	prostaglandin metabolic process
Cyp2s1	cytochrome P450, family 2, subfamily s, polypeptide 1 [Source:MGI Symbol;Acc:MGI:1921384]	GO:0042573	retinoic acid metabolic process
Cyp2s1	cytochrome P450, family 2, subfamily s, polypeptide 1 [Source:MGI Symbol;Acc:MGI:1921384]
Gm2981	predicted gene 2981 [Source:MGI Symbol;Acc:MGI:3781159]
