# Supplementary material for: Unraveling the brain expression of BDNF in a mouse model of Anorexia Nervosa
Source: Research Square preprint supplement (doi:10.21203/rs.3.rs-6260210/v1), 2025-04-16
Supplement: Supplementary file 7 [file da2f0edd23d8fd7a936fb847.xlsx]

## Sheet: Supplementary Table 3
Supplementary Table 3. Functional Annotation of Differentially Expressed Genes in the prefrontal cortex from Table 1
external_gene_name	description	go_id	name_1006
Rskr	ribosomal protein S6 kinase related [Source:MGI Symbol;Acc:MGI:2652869]	GO:0005524	ATP binding
Rskr	ribosomal protein S6 kinase related [Source:MGI Symbol;Acc:MGI:2652869]	GO:0004672	protein kinase activity
Rskr	ribosomal protein S6 kinase related [Source:MGI Symbol;Acc:MGI:2652869]	GO:0006468	protein phosphorylation
Rskr	ribosomal protein S6 kinase related [Source:MGI Symbol;Acc:MGI:2652869]	GO:0005575	cellular_component
Rskr	ribosomal protein S6 kinase related [Source:MGI Symbol;Acc:MGI:2652869]	GO:0004674	protein serine/threonine kinase activity
Rskr	ribosomal protein S6 kinase related [Source:MGI Symbol;Acc:MGI:2652869]	GO:0106310	protein serine kinase activity
Rskr	ribosomal protein S6 kinase related [Source:MGI Symbol;Acc:MGI:2652869]	GO:0016740	transferase activity
Rskr	ribosomal protein S6 kinase related [Source:MGI Symbol;Acc:MGI:2652869]
Igfn1	immunoglobulin-like and fibronectin type III domain containing 1 [Source:MGI Symbol;Acc:MGI:3045352]
Igfn1	immunoglobulin-like and fibronectin type III domain containing 1 [Source:MGI Symbol;Acc:MGI:3045352]	GO:0005515	protein binding
Igfn1	immunoglobulin-like and fibronectin type III domain containing 1 [Source:MGI Symbol;Acc:MGI:3045352]	GO:0003674	molecular_function
Igfn1	immunoglobulin-like and fibronectin type III domain containing 1 [Source:MGI Symbol;Acc:MGI:3045352]	GO:0005634	nucleus
Igfn1	immunoglobulin-like and fibronectin type III domain containing 1 [Source:MGI Symbol;Acc:MGI:3045352]	GO:0005737	cytoplasm
Igfn1	immunoglobulin-like and fibronectin type III domain containing 1 [Source:MGI Symbol;Acc:MGI:3045352]	GO:0043232	intracellular non-membrane-bounded organelle
Igfn1	immunoglobulin-like and fibronectin type III domain containing 1 [Source:MGI Symbol;Acc:MGI:3045352]	GO:0030018	Z disc
Igfn1	immunoglobulin-like and fibronectin type III domain containing 1 [Source:MGI Symbol;Acc:MGI:3045352]	GO:0008150	biological_process
Panx2	pannexin 2 [Source:MGI Symbol;Acc:MGI:1890615]	GO:0015267	channel activity
Panx2	pannexin 2 [Source:MGI Symbol;Acc:MGI:1890615]	GO:0006812	monoatomic cation transport
Panx2	pannexin 2 [Source:MGI Symbol;Acc:MGI:1890615]	GO:0032732	positive regulation of interleukin-1 production
Panx2	pannexin 2 [Source:MGI Symbol;Acc:MGI:1890615]	GO:0002931	response to ischemia
Panx2	pannexin 2 [Source:MGI Symbol;Acc:MGI:1890615]	GO:0044877	protein-containing complex binding
Panx2	pannexin 2 [Source:MGI Symbol;Acc:MGI:1890615]	GO:0005737	cytoplasm
Panx2	pannexin 2 [Source:MGI Symbol;Acc:MGI:1890615]	GO:0000139	Golgi membrane
Panx2	pannexin 2 [Source:MGI Symbol;Acc:MGI:1890615]	GO:0005794	Golgi apparatus
Panx2	pannexin 2 [Source:MGI Symbol;Acc:MGI:1890615]	GO:0005886	plasma membrane
Panx2	pannexin 2 [Source:MGI Symbol;Acc:MGI:1890615]	GO:0005783	endoplasmic reticulum
Panx2	pannexin 2 [Source:MGI Symbol;Acc:MGI:1890615]	GO:0005789	endoplasmic reticulum membrane
Panx2	pannexin 2 [Source:MGI Symbol;Acc:MGI:1890615]	GO:0034220	monoatomic ion transmembrane transport
Panx2	pannexin 2 [Source:MGI Symbol;Acc:MGI:1890615]	GO:0005198	structural molecule activity
Panx2	pannexin 2 [Source:MGI Symbol;Acc:MGI:1890615]	GO:0007267	cell-cell signaling
Panx2	pannexin 2 [Source:MGI Symbol;Acc:MGI:1890615]	GO:0022829	wide pore channel activity
Panx2	pannexin 2 [Source:MGI Symbol;Acc:MGI:1890615]	GO:0005243	gap junction channel activity
Panx2	pannexin 2 [Source:MGI Symbol;Acc:MGI:1890615]
Akt2	thymoma viral proto-oncogene 2 [Source:MGI Symbol;Acc:MGI:104874]	GO:0005524	ATP binding
Akt2	thymoma viral proto-oncogene 2 [Source:MGI Symbol;Acc:MGI:104874]	GO:0004672	protein kinase activity
Akt2	thymoma viral proto-oncogene 2 [Source:MGI Symbol;Acc:MGI:104874]	GO:0006468	protein phosphorylation
Akt2	thymoma viral proto-oncogene 2 [Source:MGI Symbol;Acc:MGI:104874]	GO:0004674	protein serine/threonine kinase activity
Akt2	thymoma viral proto-oncogene 2 [Source:MGI Symbol;Acc:MGI:104874]	GO:0043066	negative regulation of apoptotic process
Akt2	thymoma viral proto-oncogene 2 [Source:MGI Symbol;Acc:MGI:104874]	GO:0010628	positive regulation of gene expression
Akt2	thymoma viral proto-oncogene 2 [Source:MGI Symbol;Acc:MGI:104874]	GO:0045944	positive regulation of transcription by RNA polymerase II
Akt2	thymoma viral proto-oncogene 2 [Source:MGI Symbol;Acc:MGI:104874]	GO:0006006	glucose metabolic process
Akt2	thymoma viral proto-oncogene 2 [Source:MGI Symbol;Acc:MGI:104874]	GO:0032868	response to insulin
Akt2	thymoma viral proto-oncogene 2 [Source:MGI Symbol;Acc:MGI:104874]	GO:0043491	phosphatidylinositol 3-kinase/protein kinase B signal transduction
Akt2	thymoma viral proto-oncogene 2 [Source:MGI Symbol;Acc:MGI:104874]	GO:0005634	nucleus
Akt2	thymoma viral proto-oncogene 2 [Source:MGI Symbol;Acc:MGI:104874]	GO:0005737	cytoplasm
Akt2	thymoma viral proto-oncogene 2 [Source:MGI Symbol;Acc:MGI:104874]	GO:0046872	metal ion binding
Akt2	thymoma viral proto-oncogene 2 [Source:MGI Symbol;Acc:MGI:104874]	GO:0005886	plasma membrane
Akt2	thymoma viral proto-oncogene 2 [Source:MGI Symbol;Acc:MGI:104874]	GO:0005768	endosome
Akt2	thymoma viral proto-oncogene 2 [Source:MGI Symbol;Acc:MGI:104874]	GO:0035556	intracellular signal transduction
Akt2	thymoma viral proto-oncogene 2 [Source:MGI Symbol;Acc:MGI:104874]	GO:0005515	protein binding
Akt2	thymoma viral proto-oncogene 2 [Source:MGI Symbol;Acc:MGI:104874]	GO:0006417	regulation of translation
Akt2	thymoma viral proto-oncogene 2 [Source:MGI Symbol;Acc:MGI:104874]	GO:0006915	apoptotic process
Akt2	thymoma viral proto-oncogene 2 [Source:MGI Symbol;Acc:MGI:104874]	GO:0005938	cell cortex
Akt2	thymoma viral proto-oncogene 2 [Source:MGI Symbol;Acc:MGI:104874]	GO:0005769	early endosome
Akt2	thymoma viral proto-oncogene 2 [Source:MGI Symbol;Acc:MGI:104874]	GO:0001934	positive regulation of protein phosphorylation
Akt2	thymoma viral proto-oncogene 2 [Source:MGI Symbol;Acc:MGI:104874]	GO:0106310	protein serine kinase activity
Akt2	thymoma viral proto-oncogene 2 [Source:MGI Symbol;Acc:MGI:104874]	GO:0005978	glycogen biosynthetic process
Akt2	thymoma viral proto-oncogene 2 [Source:MGI Symbol;Acc:MGI:104874]	GO:0016529	sarcoplasmic reticulum
Akt2	thymoma viral proto-oncogene 2 [Source:MGI Symbol;Acc:MGI:104874]	GO:0032587	ruffle membrane
Akt2	thymoma viral proto-oncogene 2 [Source:MGI Symbol;Acc:MGI:104874]	GO:0050821	protein stabilization
Akt2	thymoma viral proto-oncogene 2 [Source:MGI Symbol;Acc:MGI:104874]	GO:0045429	positive regulation of nitric oxide biosynthetic process
Akt2	thymoma viral proto-oncogene 2 [Source:MGI Symbol;Acc:MGI:104874]	GO:0046326	positive regulation of glucose import
Akt2	thymoma viral proto-oncogene 2 [Source:MGI Symbol;Acc:MGI:104874]	GO:0072659	protein localization to plasma membrane
Akt2	thymoma viral proto-oncogene 2 [Source:MGI Symbol;Acc:MGI:104874]	GO:0010765	positive regulation of sodium ion transport
Akt2	thymoma viral proto-oncogene 2 [Source:MGI Symbol;Acc:MGI:104874]	GO:0071407	cellular response to organic cyclic compound
Akt2	thymoma viral proto-oncogene 2 [Source:MGI Symbol;Acc:MGI:104874]	GO:0030335	positive regulation of cell migration
Akt2	thymoma viral proto-oncogene 2 [Source:MGI Symbol;Acc:MGI:104874]	GO:0090314	positive regulation of protein targeting to membrane
Akt2	thymoma viral proto-oncogene 2 [Source:MGI Symbol;Acc:MGI:104874]	GO:0031982	vesicle
Akt2	thymoma viral proto-oncogene 2 [Source:MGI Symbol;Acc:MGI:104874]	GO:0050927	positive regulation of positive chemotaxis
Akt2	thymoma viral proto-oncogene 2 [Source:MGI Symbol;Acc:MGI:104874]	GO:0033138	positive regulation of peptidyl-serine phosphorylation
Akt2	thymoma viral proto-oncogene 2 [Source:MGI Symbol;Acc:MGI:104874]	GO:0032869	cellular response to insulin stimulus
Akt2	thymoma viral proto-oncogene 2 [Source:MGI Symbol;Acc:MGI:104874]	GO:0005080	protein kinase C binding
Akt2	thymoma viral proto-oncogene 2 [Source:MGI Symbol;Acc:MGI:104874]	GO:0008286	insulin receptor signaling pathway
Akt2	thymoma viral proto-oncogene 2 [Source:MGI Symbol;Acc:MGI:104874]	GO:0032287	peripheral nervous system myelin maintenance
Akt2	thymoma viral proto-oncogene 2 [Source:MGI Symbol;Acc:MGI:104874]	GO:0032593	insulin-responsive compartment
Akt2	thymoma viral proto-oncogene 2 [Source:MGI Symbol;Acc:MGI:104874]	GO:0009967	positive regulation of signal transduction
Akt2	thymoma viral proto-oncogene 2 [Source:MGI Symbol;Acc:MGI:104874]	GO:1903676	positive regulation of cap-dependent translational initiation
Akt2	thymoma viral proto-oncogene 2 [Source:MGI Symbol;Acc:MGI:104874]	GO:0010748	negative regulation of long-chain fatty acid import across plasma membrane
Akt2	thymoma viral proto-oncogene 2 [Source:MGI Symbol;Acc:MGI:104874]	GO:0010907	positive regulation of glucose metabolic process
Akt2	thymoma viral proto-oncogene 2 [Source:MGI Symbol;Acc:MGI:104874]	GO:0032000	positive regulation of fatty acid beta-oxidation
Akt2	thymoma viral proto-oncogene 2 [Source:MGI Symbol;Acc:MGI:104874]	GO:0045725	positive regulation of glycogen biosynthetic process
Akt2	thymoma viral proto-oncogene 2 [Source:MGI Symbol;Acc:MGI:104874]	GO:2000147	positive regulation of cell motility
Akt2	thymoma viral proto-oncogene 2 [Source:MGI Symbol;Acc:MGI:104874]	GO:0005654	nucleoplasm
Akt2	thymoma viral proto-oncogene 2 [Source:MGI Symbol;Acc:MGI:104874]	GO:0005829	cytosol
Akt2	thymoma viral proto-oncogene 2 [Source:MGI Symbol;Acc:MGI:104874]	GO:0043231	intracellular membrane-bounded organelle
Akt2	thymoma viral proto-oncogene 2 [Source:MGI Symbol;Acc:MGI:104874]	GO:0071486	cellular response to high light intensity
Akt2	thymoma viral proto-oncogene 2 [Source:MGI Symbol;Acc:MGI:104874]	GO:0097473	retinal rod cell apoptotic process
Akt2	thymoma viral proto-oncogene 2 [Source:MGI Symbol;Acc:MGI:104874]	GO:0033119	negative regulation of RNA splicing
Colq	collagen like tail subunit of asymmetric acetylcholinesterase [Source:MGI Symbol;Acc:MGI:1338761]	GO:0005515	protein binding
Colq	collagen like tail subunit of asymmetric acetylcholinesterase [Source:MGI Symbol;Acc:MGI:1338761]	GO:0005615	extracellular space
Colq	collagen like tail subunit of asymmetric acetylcholinesterase [Source:MGI Symbol;Acc:MGI:1338761]	GO:0045202	synapse
Colq	collagen like tail subunit of asymmetric acetylcholinesterase [Source:MGI Symbol;Acc:MGI:1338761]	GO:0005581	collagen trimer
Colq	collagen like tail subunit of asymmetric acetylcholinesterase [Source:MGI Symbol;Acc:MGI:1338761]	GO:0062023	collagen-containing extracellular matrix
Colq	collagen like tail subunit of asymmetric acetylcholinesterase [Source:MGI Symbol;Acc:MGI:1338761]	GO:0030198	extracellular matrix organization
Colq	collagen like tail subunit of asymmetric acetylcholinesterase [Source:MGI Symbol;Acc:MGI:1338761]	GO:0031594	neuromuscular junction
Colq	collagen like tail subunit of asymmetric acetylcholinesterase [Source:MGI Symbol;Acc:MGI:1338761]	GO:0008201	heparin binding
Colq	collagen like tail subunit of asymmetric acetylcholinesterase [Source:MGI Symbol;Acc:MGI:1338761]	GO:0030020	extracellular matrix structural constituent conferring tensile strength
Colq	collagen like tail subunit of asymmetric acetylcholinesterase [Source:MGI Symbol;Acc:MGI:1338761]	GO:0005201	extracellular matrix structural constituent
Colq	collagen like tail subunit of asymmetric acetylcholinesterase [Source:MGI Symbol;Acc:MGI:1338761]	GO:0071340	skeletal muscle acetylcholine-gated channel clustering
Colq	collagen like tail subunit of asymmetric acetylcholinesterase [Source:MGI Symbol;Acc:MGI:1338761]	GO:0008582	regulation of synaptic assembly at neuromuscular junction
Colq	collagen like tail subunit of asymmetric acetylcholinesterase [Source:MGI Symbol;Acc:MGI:1338761]	GO:0090150	establishment of protein localization to membrane
Colq	collagen like tail subunit of asymmetric acetylcholinesterase [Source:MGI Symbol;Acc:MGI:1338761]	GO:0005886	plasma membrane
Colq	collagen like tail subunit of asymmetric acetylcholinesterase [Source:MGI Symbol;Acc:MGI:1338761]	GO:0030054	cell junction
Colq	collagen like tail subunit of asymmetric acetylcholinesterase [Source:MGI Symbol;Acc:MGI:1338761]
4930447C04Rik	RIKEN cDNA 4930447C04 gene [Source:MGI Symbol;Acc:MGI:1923051]	GO:0003674	molecular_function
4930447C04Rik	RIKEN cDNA 4930447C04 gene [Source:MGI Symbol;Acc:MGI:1923051]	GO:0030154	cell differentiation
4930447C04Rik	RIKEN cDNA 4930447C04 gene [Source:MGI Symbol;Acc:MGI:1923051]	GO:0005694	chromosome
4930447C04Rik	RIKEN cDNA 4930447C04 gene [Source:MGI Symbol;Acc:MGI:1923051]	GO:0051321	meiotic cell cycle
4930447C04Rik	RIKEN cDNA 4930447C04 gene [Source:MGI Symbol;Acc:MGI:1923051]	GO:0007283	spermatogenesis
4930447C04Rik	RIKEN cDNA 4930447C04 gene [Source:MGI Symbol;Acc:MGI:1923051]	GO:0006310	DNA recombination
4930447C04Rik	RIKEN cDNA 4930447C04 gene [Source:MGI Symbol;Acc:MGI:1923051]	GO:0048477	oogenesis
4930447C04Rik	RIKEN cDNA 4930447C04 gene [Source:MGI Symbol;Acc:MGI:1923051]	GO:0007130	synaptonemal complex assembly
4930447C04Rik	RIKEN cDNA 4930447C04 gene [Source:MGI Symbol;Acc:MGI:1923051]	GO:0000801	central element
4930447C04Rik	RIKEN cDNA 4930447C04 gene [Source:MGI Symbol;Acc:MGI:1923051]	GO:0007129	homologous chromosome pairing at meiosis
4930447C04Rik	RIKEN cDNA 4930447C04 gene [Source:MGI Symbol;Acc:MGI:1923051]	GO:0051090	regulation of DNA-binding transcription factor activity
4930447C04Rik	RIKEN cDNA 4930447C04 gene [Source:MGI Symbol;Acc:MGI:1923051]	GO:0010705	meiotic DNA double-strand break processing involved in reciprocal meiotic recombination
4930447C04Rik	RIKEN cDNA 4930447C04 gene [Source:MGI Symbol;Acc:MGI:1923051]
Gm29674	predicted gene, 29674 [Source:MGI Symbol;Acc:MGI:5588833]
Tmem74b	transmembrane protein 74B [Source:MGI Symbol;Acc:MGI:1918629]	GO:0003674	molecular_function
Tmem74b	transmembrane protein 74B [Source:MGI Symbol;Acc:MGI:1918629]	GO:0008150	biological_process
Tmem74b	transmembrane protein 74B [Source:MGI Symbol;Acc:MGI:1918629]	GO:0005575	cellular_component
Tmem74b	transmembrane protein 74B [Source:MGI Symbol;Acc:MGI:1918629]	GO:0016020	membrane
Gm37728	predicted gene, 37728 [Source:MGI Symbol;Acc:MGI:5610956]
Gm9320	predicted gene 9320 [Source:MGI Symbol;Acc:MGI:3645000]
2900076G11Rik	RIKEN cDNA 2900076G11 gene [Source:MGI Symbol;Acc:MGI:1920302]
Rps27l	ribosomal protein S27-like [Source:MGI Symbol;Acc:MGI:1915191]	GO:0003735	structural constituent of ribosome
Rps27l	ribosomal protein S27-like [Source:MGI Symbol;Acc:MGI:1915191]	GO:0006412	translation
Rps27l	ribosomal protein S27-like [Source:MGI Symbol;Acc:MGI:1915191]	GO:0005840	ribosome
Rps27l	ribosomal protein S27-like [Source:MGI Symbol;Acc:MGI:1915191]	GO:0046872	metal ion binding
Rps27l	ribosomal protein S27-like [Source:MGI Symbol;Acc:MGI:1915191]	GO:0005829	cytosol
Rps27l	ribosomal protein S27-like [Source:MGI Symbol;Acc:MGI:1915191]	GO:1990904	ribonucleoprotein complex
Rps27l	ribosomal protein S27-like [Source:MGI Symbol;Acc:MGI:1915191]	GO:0003723	RNA binding
Rps27l	ribosomal protein S27-like [Source:MGI Symbol;Acc:MGI:1915191]	GO:0022627	cytosolic small ribosomal subunit
Rps27l	ribosomal protein S27-like [Source:MGI Symbol;Acc:MGI:1915191]	GO:0000028	ribosomal small subunit assembly
Rps27l	ribosomal protein S27-like [Source:MGI Symbol;Acc:MGI:1915191]	GO:0008494	translation activator activity
Rps27l	ribosomal protein S27-like [Source:MGI Symbol;Acc:MGI:1915191]	GO:0008656	cysteine-type endopeptidase activator activity involved in apoptotic process
Rps27l	ribosomal protein S27-like [Source:MGI Symbol;Acc:MGI:1915191]	GO:0006978	DNA damage response, signal transduction by p53 class mediator resulting in transcription of p21 class mediator
Rps27l	ribosomal protein S27-like [Source:MGI Symbol;Acc:MGI:1915191]	GO:0031571	mitotic G1 DNA damage checkpoint signaling
Rps27l	ribosomal protein S27-like [Source:MGI Symbol;Acc:MGI:1915191]	GO:0042771	intrinsic apoptotic signaling pathway in response to DNA damage by p53 class mediator
Rps27l	ribosomal protein S27-like [Source:MGI Symbol;Acc:MGI:1915191]	GO:0045727	positive regulation of translation
Rps27l	ribosomal protein S27-like [Source:MGI Symbol;Acc:MGI:1915191]	GO:0005634	nucleus
Rps27l	ribosomal protein S27-like [Source:MGI Symbol;Acc:MGI:1915191]
Pomc	pro-opiomelanocortin-alpha [Source:MGI Symbol;Acc:MGI:97742]	GO:0005576	extracellular region
Pomc	pro-opiomelanocortin-alpha [Source:MGI Symbol;Acc:MGI:97742]	GO:0005179	hormone activity
Pomc	pro-opiomelanocortin-alpha [Source:MGI Symbol;Acc:MGI:97742]	GO:0005515	protein binding
Pomc	pro-opiomelanocortin-alpha [Source:MGI Symbol;Acc:MGI:97742]	GO:0008217	regulation of blood pressure
Pomc	pro-opiomelanocortin-alpha [Source:MGI Symbol;Acc:MGI:97742]	GO:0005737	cytoplasm
Pomc	pro-opiomelanocortin-alpha [Source:MGI Symbol;Acc:MGI:97742]	GO:0045944	positive regulation of transcription by RNA polymerase II
Pomc	pro-opiomelanocortin-alpha [Source:MGI Symbol;Acc:MGI:97742]	GO:0005615	extracellular space
Pomc	pro-opiomelanocortin-alpha [Source:MGI Symbol;Acc:MGI:97742]	GO:0007165	signal transduction
Pomc	pro-opiomelanocortin-alpha [Source:MGI Symbol;Acc:MGI:97742]	GO:0001664	G protein-coupled receptor binding
Pomc	pro-opiomelanocortin-alpha [Source:MGI Symbol;Acc:MGI:97742]	GO:0030141	secretory granule
Pomc	pro-opiomelanocortin-alpha [Source:MGI Symbol;Acc:MGI:97742]	GO:0042593	glucose homeostasis
Pomc	pro-opiomelanocortin-alpha [Source:MGI Symbol;Acc:MGI:97742]	GO:0007267	cell-cell signaling
Pomc	pro-opiomelanocortin-alpha [Source:MGI Symbol;Acc:MGI:97742]	GO:0007218	neuropeptide signaling pathway
Pomc	pro-opiomelanocortin-alpha [Source:MGI Symbol;Acc:MGI:97742]	GO:0006091	generation of precursor metabolites and energy
Pomc	pro-opiomelanocortin-alpha [Source:MGI Symbol;Acc:MGI:97742]	GO:0032720	negative regulation of tumor necrosis factor production
Pomc	pro-opiomelanocortin-alpha [Source:MGI Symbol;Acc:MGI:97742]	GO:0070873	regulation of glycogen metabolic process
Pomc	pro-opiomelanocortin-alpha [Source:MGI Symbol;Acc:MGI:97742]	GO:0019722	calcium-mediated signaling
Pomc	pro-opiomelanocortin-alpha [Source:MGI Symbol;Acc:MGI:97742]	GO:2000852	regulation of corticosterone secretion
Pomc	pro-opiomelanocortin-alpha [Source:MGI Symbol;Acc:MGI:97742]	GO:0005102	signaling receptor binding
Pomc	pro-opiomelanocortin-alpha [Source:MGI Symbol;Acc:MGI:97742]	GO:0031781	type 3 melanocortin receptor binding
Pomc	pro-opiomelanocortin-alpha [Source:MGI Symbol;Acc:MGI:97742]	GO:0031782	type 4 melanocortin receptor binding
Pomc	pro-opiomelanocortin-alpha [Source:MGI Symbol;Acc:MGI:97742]	GO:0070996	type 1 melanocortin receptor binding
Pomc	pro-opiomelanocortin-alpha [Source:MGI Symbol;Acc:MGI:97742]	GO:0032098	regulation of appetite
Pomc	pro-opiomelanocortin-alpha [Source:MGI Symbol;Acc:MGI:97742]	GO:0033059	cellular pigmentation
Pomc	pro-opiomelanocortin-alpha [Source:MGI Symbol;Acc:MGI:97742]	GO:0106071	positive regulation of adenylate cyclase-activating G protein-coupled receptor signaling pathway
Pomc	pro-opiomelanocortin-alpha [Source:MGI Symbol;Acc:MGI:97742]	GO:0140668	positive regulation of oxytocin production
Pomc	pro-opiomelanocortin-alpha [Source:MGI Symbol;Acc:MGI:97742]	GO:1990680	response to melanocyte-stimulating hormone
Pomc	pro-opiomelanocortin-alpha [Source:MGI Symbol;Acc:MGI:97742]
A930035D04Rik
Kif11	kinesin family member 11 [Source:MGI Symbol;Acc:MGI:1098231]	GO:0005524	ATP binding
Kif11	kinesin family member 11 [Source:MGI Symbol;Acc:MGI:1098231]	GO:0003777	microtubule motor activity
Kif11	kinesin family member 11 [Source:MGI Symbol;Acc:MGI:1098231]	GO:0008017	microtubule binding
Kif11	kinesin family member 11 [Source:MGI Symbol;Acc:MGI:1098231]	GO:0007018	microtubule-based movement
Kif11	kinesin family member 11 [Source:MGI Symbol;Acc:MGI:1098231]	GO:0005737	cytoplasm
Kif11	kinesin family member 11 [Source:MGI Symbol;Acc:MGI:1098231]	GO:0005634	nucleus
Kif11	kinesin family member 11 [Source:MGI Symbol;Acc:MGI:1098231]	GO:0005856	cytoskeleton
Kif11	kinesin family member 11 [Source:MGI Symbol;Acc:MGI:1098231]	GO:0005874	microtubule
Kif11	kinesin family member 11 [Source:MGI Symbol;Acc:MGI:1098231]	GO:0051301	cell division
Kif11	kinesin family member 11 [Source:MGI Symbol;Acc:MGI:1098231]	GO:0005819	spindle
Kif11	kinesin family member 11 [Source:MGI Symbol;Acc:MGI:1098231]	GO:0008574	plus-end-directed microtubule motor activity
Kif11	kinesin family member 11 [Source:MGI Symbol;Acc:MGI:1098231]	GO:0000922	spindle pole
Kif11	kinesin family member 11 [Source:MGI Symbol;Acc:MGI:1098231]	GO:0019901	protein kinase binding
Kif11	kinesin family member 11 [Source:MGI Symbol;Acc:MGI:1098231]	GO:0090307	mitotic spindle assembly
Kif11	kinesin family member 11 [Source:MGI Symbol;Acc:MGI:1098231]	GO:0051225	spindle assembly
Kif11	kinesin family member 11 [Source:MGI Symbol;Acc:MGI:1098231]	GO:0072686	mitotic spindle
Kif11	kinesin family member 11 [Source:MGI Symbol;Acc:MGI:1098231]	GO:0005876	spindle microtubule
Kif11	kinesin family member 11 [Source:MGI Symbol;Acc:MGI:1098231]	GO:0046602	regulation of mitotic centrosome separation
Kif11	kinesin family member 11 [Source:MGI Symbol;Acc:MGI:1098231]	GO:0051231	spindle elongation
Kif11	kinesin family member 11 [Source:MGI Symbol;Acc:MGI:1098231]	GO:0007100	mitotic centrosome separation
Kif11	kinesin family member 11 [Source:MGI Symbol;Acc:MGI:1098231]	GO:0007051	spindle organization
Kif11	kinesin family member 11 [Source:MGI Symbol;Acc:MGI:1098231]	GO:0005829	cytosol
Kif11	kinesin family member 11 [Source:MGI Symbol;Acc:MGI:1098231]	GO:0032991	protein-containing complex
Kif11	kinesin family member 11 [Source:MGI Symbol;Acc:MGI:1098231]
Rps15a-ps6	ribosomal protein S15A, pseudogene 6 [Source:MGI Symbol;Acc:MGI:3650298]
Gm4117	predicted gene 4117 [Source:MGI Symbol;Acc:MGI:3782293]	GO:0003674	molecular_function
Gm4117	predicted gene 4117 [Source:MGI Symbol;Acc:MGI:3782293]	GO:0008150	biological_process
Gm4117	predicted gene 4117 [Source:MGI Symbol;Acc:MGI:3782293]	GO:0005575	cellular_component
Gm4117	predicted gene 4117 [Source:MGI Symbol;Acc:MGI:3782293]
Pm20d1	peptidase M20 domain containing 1 [Source:MGI Symbol;Acc:MGI:2442939]	GO:0016787	hydrolase activity
Pm20d1	peptidase M20 domain containing 1 [Source:MGI Symbol;Acc:MGI:2442939]	GO:0006629	lipid metabolic process
Pm20d1	peptidase M20 domain containing 1 [Source:MGI Symbol;Acc:MGI:2442939]	GO:0046872	metal ion binding
Pm20d1	peptidase M20 domain containing 1 [Source:MGI Symbol;Acc:MGI:2442939]	GO:0008233	peptidase activity
Pm20d1	peptidase M20 domain containing 1 [Source:MGI Symbol;Acc:MGI:2442939]	GO:0006508	proteolysis
Pm20d1	peptidase M20 domain containing 1 [Source:MGI Symbol;Acc:MGI:2442939]	GO:0005576	extracellular region
Pm20d1	peptidase M20 domain containing 1 [Source:MGI Symbol;Acc:MGI:2442939]	GO:0005615	extracellular space
Pm20d1	peptidase M20 domain containing 1 [Source:MGI Symbol;Acc:MGI:2442939]	GO:0004046	aminoacylase activity
Pm20d1	peptidase M20 domain containing 1 [Source:MGI Symbol;Acc:MGI:2442939]	GO:0044255	cellular lipid metabolic process
Pm20d1	peptidase M20 domain containing 1 [Source:MGI Symbol;Acc:MGI:2442939]	GO:0016829	lyase activity
Pm20d1	peptidase M20 domain containing 1 [Source:MGI Symbol;Acc:MGI:2442939]	GO:0006631	fatty acid metabolic process
Pm20d1	peptidase M20 domain containing 1 [Source:MGI Symbol;Acc:MGI:2442939]	GO:0016811	hydrolase activity, acting on carbon-nitrogen (but not peptide) bonds, in linear amides
Pm20d1	peptidase M20 domain containing 1 [Source:MGI Symbol;Acc:MGI:2442939]	GO:0006520	amino acid metabolic process
Pm20d1	peptidase M20 domain containing 1 [Source:MGI Symbol;Acc:MGI:2442939]	GO:0097009	energy homeostasis
Pm20d1	peptidase M20 domain containing 1 [Source:MGI Symbol;Acc:MGI:2442939]	GO:1990845	adaptive thermogenesis
Pm20d1	peptidase M20 domain containing 1 [Source:MGI Symbol;Acc:MGI:2442939]	GO:0022904	respiratory electron transport chain
Pm20d1	peptidase M20 domain containing 1 [Source:MGI Symbol;Acc:MGI:2442939]	GO:0043604	amide biosynthetic process
Pm20d1	peptidase M20 domain containing 1 [Source:MGI Symbol;Acc:MGI:2442939]	GO:0043605	amide catabolic process
Pm20d1	peptidase M20 domain containing 1 [Source:MGI Symbol;Acc:MGI:2442939]
